# Supplementary material for: Oral transfer of chemical cues, growth proteins and hormones in social insects
Source: eLife. 2016 Nov 29;5:e20375. doi: 10.7554/eLife.20375 (PMC5153251; doi:10.7554/eLife.20375)
Supplement: Figure 3—source data 1. — C11, 20 ants, 9.5 µL of TF; C12, 38 ants, 20 µL; C13, 34 ants, 11 µL; C14, 26 ants, 11.5 µL; C15, 35 ants, 9 µL. [file elife-20375-fig3-data1.xlsx]

## Sheet: Cuticle
PEAK LIST								PEAK LIST								PEAK LIST								PEAK LIST								PEAK LIST
B-B10a.raw								B-B13.raw								B-B21.raw								B-B34.raw								B-B52.raw
RT: 40.00 - 50.62								RT: 40.00 - 50.62								RT: 40.00 - 50.62								RT: 40.00 - 50.62								RT: 40.00 - 50.62
Number of detected peaks:51								Number of detected peaks: 133								Number of detected peaks: 106								Number of detected peaks: 104								Number of detected peaks: 121
Apex RT	Start RT	End RT	Area	%Area	Height	%Height		Apex RT	Start RT	End RT	Area	%Area	Height	%Height		Apex RT	Start RT	End RT	Area	%Area	Height	%Height		Apex RT	Start RT	End RT	Area	%Area	Height	%Height		Apex RT	Start RT	End RT	Area	%Area	Height	%Height
40.06	40.03	40.08	226573	0.07	100073	0.08		40	39.98	40.01	28042.5	0.01	23974.6	0.02		40.05	39.98	40.16	3.35707e+07	0.16	7.17707e+06	0.11		40.06	39.97	40.15	2.20418e+07	0.13	4.6728e+06	0.1		40.04	40.03	40.05	9490.08	0	11887.4	0.01
40.09	40.08	40.13	159297	0.05	80097.5	0.06		40.08	40.01	40.12	136945	0.04	49748	0.04		40.19	40.16	40.24	777587	0	304425	0		40.21	40.15	40.25	1.11698e+06	0.01	285062	0.01		40.06	40.05	40.07	12708.1	0	13598.2	0.01
40.64	40.62	40.66	89195.2	0.03	61644.7	0.05		40.15	40.14	40.16	11416.8	0	18461	0.02		40.25	40.25	40.26	48181.2	0	84899	0		40.32	40.25	40.34	996298	0.01	301506	0.01		40.09	40.07	40.1	18172.7	0	17983	0.02
40.67	40.66	40.7	113614	0.03	81303	0.07		40.18	40.17	40.2	19194.9	0.01	23348.5	0.02		40.3	40.27	40.37	1.08599e+06	0.01	309453	0		40.39	40.34	40.46	1.74522e+06	0.01	411510	0.01		40.11	40.1	40.12	10733.1	0	11152.9	0.01
41.91	41.83	41.98	6.43757e+06	1.89	1.53853e+06	1.24		40.22	40.2	40.24	29489.9	0.01	35454.7	0.03		40.4	40.37	40.43	314873	0	223217	0		40.49	40.47	40.5	183624	0	156132	0		40.27	40.26	40.28	8846.39	0	14069.2	0.01
42.01	41.98	42.09	1.52817e+06	0.45	437182	0.35		40.27	40.25	40.28	10058.5	0	10176.2	0.01		40.45	40.43	40.46	161705	0	173563	0		40.51	40.5	40.52	44588.4	0	70710.2	0		40.73	40.71	40.75	12919	0	10838	0.01
42.18	42.15	42.21	270861	0.08	117380	0.09		40.3	40.29	40.31	13876.5	0	21064.8	0.02		40.5	40.49	40.51	57863.9	0	94147.7	0		40.62	40.55	40.72	4.39707e+07	0.27	9.48693e+06	0.19		40.91	40.9	40.94	18765.1	0	14936.1	0.01
42.24	42.21	42.26	249745	0.07	118742	0.1		40.34	40.33	40.36	10903.1	0	17587.5	0.02		40.52	40.51	40.54	153484	0	117455	0		40.78	40.72	40.87	2.33649e+07	0.14	5.01249e+06	0.1		41.13	41.12	41.14	6525.44	0	9551.67	0.01
42.48	42.4	42.63	8.85697e+06	2.6	2.39276e+06	1.94		40.38	40.37	40.39	10539.9	0	16428.1	0.01		40.64	40.56	40.71	2.01653e+07	0.1	4.02741e+06	0.06		40.97	40.91	41.01	940877	0.01	259540	0.01		41.36	41.34	41.38	16632.7	0	9874.97	0.01
42.71	42.66	42.81	4.5331e+06	1.33	1.30794e+06	1.06		40.39	40.39	40.4	4631.17	0	7891.79	0.01		40.76	40.71	40.88	1.21756e+07	0.06	2.15656e+06	0.03		41.02	41.01	41.05	333407	0	209039	0		41.57	41.56	41.58	9920.58	0	11274.5	0.01
42.83	42.81	42.85	159329	0.05	109793	0.09		40.42	40.41	40.44	15466.8	0	14871.8	0.01		40.9	40.89	40.91	47941.1	0	73387.3	0		41.08	41.06	41.11	283640	0	153742	0		41.83	41.81	41.86	38512.9	0.01	23691.9	0.02
42.91	42.87	42.99	1.9156e+06	0.56	604931	0.49		40.48	40.47	40.48	5525.49	0	9296.17	0.01		40.95	40.91	40.97	595331	0	254030	0		41.13	41.11	41.17	491204	0	217551	0		41.88	41.86	41.95	241396	0.06	91984	0.09
43.3	43.24	43.41	2.34167e+06	0.69	501385	0.41		40.49	40.48	40.5	7134.52	0	11423.5	0.01		40.99	40.97	41.04	465595	0	169492	0		41.19	41.17	41.2	204220	0	172985	0		42	41.97	42.01	30523.3	0.01	22456.7	0.02
43.52	43.48	43.61	1.01076e+06	0.3	335030	0.27		40.58	40.57	40.59	6359.16	0	11884.8	0.01		41.05	41.04	41.06	71805.9	0	114464	0		41.21	41.2	41.23	108011	0	97069.3	0		42.02	42.01	42.05	38686.7	0.01	30556.9	0.03
43.64	43.61	43.66	181918	0.05	108989	0.09		40.62	40.61	40.69	87502.9	0.03	37240.1	0.03		41.08	41.07	41.09	69473.2	0	133583	0		41.36	41.3	41.52	1.45929e+07	0.09	2.21617e+06	0.05		42.16	42.13	42.18	19417.8	0	11850.1	0.01
43.67	43.66	43.69	97589.8	0.03	100127	0.08		40.69	40.69	40.72	15457.5	0	20638.1	0.02		41.11	41.09	41.12	127900	0	108587	0		41.53	41.52	41.54	62939.3	0	125437	0		42.23	42.2	42.27	48642.5	0.01	23843.7	0.02
43.79	43.76	43.83	504806	0.15	206558	0.17		40.78	40.72	40.8	58667.2	0.02	34290.5	0.03		41.15	41.12	41.19	303707	0	137415	0		41.62	41.55	41.68	2.37029e+06	0.01	682869	0.01		42.32	42.3	42.33	23699.5	0.01	27652.8	0.03
43.89	43.84	44.01	9.44712e+06	2.78	2.24225e+06	1.81		40.82	40.8	40.86	65739.3	0.02	42671.3	0.04		41.21	41.19	41.23	261888	0	236641	0		41.7	41.69	41.71	94897.4	0	119703	0		42.45	42.39	42.5	191379	0.05	72598	0.07
44.1	44.06	44.14	726277	0.21	319631	0.26		40.9	40.86	40.91	11742.4	0	11267.4	0.01		41.25	41.24	41.27	55969.5	0	73868	0		41.74	41.71	41.79	433924	0	224249	0		42.53	42.52	42.54	6279.93	0	12751.2	0.01
44.37	44.28	44.46	1.77041e+07	5.2	3.70993e+06	3		40.96	40.94	40.97	20363.4	0.01	27644	0.02		41.37	41.27	41.55	1.70594e+07	0.08	2.38797e+06	0.04		41.88	41.81	41.97	1.735e+08	1.05	4.59486e+07	0.94		42.7	42.67	42.76	224349	0.06	86717.8	0.08
44.73	44.65	44.77	5.34525e+06	1.57	1.54966e+06	1.25		40.98	40.97	40.99	11951.7	0	10854.8	0.01		41.64	41.55	41.68	1.61752e+06	0.01	427738	0.01		42	41.97	42.07	2.12285e+07	0.13	5.68478e+06	0.12		42.78	42.76	42.81	40862.7	0.01	35510.9	0.03
44.79	44.77	44.82	1.77521e+06	0.52	891544	0.72		41.01	40.99	41.03	21509.8	0.01	17972.3	0.02		41.74	41.68	41.77	708737	0	267531	0		42.24	42.14	42.33	8.11012e+07	0.49	2.06951e+07	0.42		42.85	42.84	42.86	7831.93	0	10849	0.01
44.85	44.83	44.86	209588	0.06	164457	0.13		41.08	41.04	41.11	30407.7	0.01	20918.1	0.02		41.77	41.77	41.78	34164.8	0	66175.5	0		42.37	42.36	42.38	146329	0	233053	0		42.89	42.86	42.93	79784.2	0.02	34617	0.03
44.89	44.86	44.91	476991	0.14	318298	0.26		41.17	41.16	41.2	13401.3	0	9537.98	0.01		41.8	41.78	41.8	67824.9	0	84183.5	0		42.46	42.39	42.57	1.13264e+08	0.69	3.09637e+07	0.63		42.94	42.93	42.97	27370.2	0.01	20921.4	0.02
45.04	44.97	45.13	6.47642e+06	1.9	1.58973e+06	1.29		41.22	41.21	41.23	5338.23	0	7332.63	0.01		41.89	41.82	41.96	1.56316e+08	0.75	4.17438e+07	0.65		42.57	42.57	42.58	56323.7	0	138762	0		42.99	42.97	42.99	9763.67	0	13548.2	0.01
45.21	45.2	45.22	74568.3	0.02	84954.5	0.07		41.24	41.23	41.24	6490.53	0	9838.22	0.01		42	41.96	42.08	4.41407e+07	0.21	1.08015e+07	0.17		42.59	42.59	42.6	76634.5	0	130094	0		43	42.99	43.02	12743.2	0	18723.1	0.02
45.22	45.22	45.25	117241	0.03	98852.2	0.08		41.25	41.24	41.26	7606.26	0	9541	0.01		42.1	42.09	42.11	101969	0	150247	0		42.61	42.61	42.62	76205.7	0	174829	0		43.04	43.02	43.05	24316.7	0.01	22755.1	0.02
45.47	45.38	45.53	1.60186e+06	0.47	414345	0.34		41.27	41.26	41.3	11303.6	0	10206.4	0.01		42.25	42.13	42.33	1.47905e+07	0.07	2.62142e+06	0.04		42.71	42.63	42.82	1.29285e+09	7.84	4.07709e+08	8.3		43.09	43.06	43.12	27153.9	0.01	15747	0.02
45.72	45.56	45.78	4.02887e+06	1.18	546439	0.44		41.31	41.3	41.32	11738.8	0	13609.7	0.01		42.36	42.35	42.37	140397	0	164291	0		42.9	42.84	42.98	2.61792e+07	0.16	7.95399e+06	0.16		43.17	43.16	43.18	13870.3	0	18694.2	0.02
46	45.95	46.06	4.26411e+06	1.25	1.32262e+06	1.07		41.36	41.32	41.39	43565.1	0.01	23581.8	0.02		42.47	42.39	42.57	1.97796e+08	0.95	5.54362e+07	0.87		42.99	42.98	43.02	254239	0	171058	0		43.23	43.18	43.25	67474.4	0.02	39247.6	0.04
46.07	46.06	46.08	409633	0.12	431010	0.35		41.43	41.39	41.45	56310.8	0.02	34403.8	0.03		42.59	42.58	42.63	665978	0	420828	0.01		43.04	43.03	43.05	145082	0	179385	0		43.29	43.25	43.39	190401	0.05	39902.5	0.04
46.18	46.13	46.22	687078	0.2	274609	0.22		41.46	41.45	41.49	22819.7	0.01	15481.4	0.01		42.71	42.63	42.82	3.79154e+08	1.82	1.26968e+08	1.99		43.08	43.05	43.09	310275	0	199979	0		43.41	43.39	43.43	27789.1	0.01	26222.9	0.03
46.23	46.22	46.23	50235.6	0.01	73500	0.06		41.52	41.5	41.53	12039.4	0	12879.9	0.01		42.83	42.82	42.84	169855	0	248681	0		43.1	43.09	43.13	335785	0	215099	0		43.45	43.44	43.45	9036.19	0	14178.7	0.01
46.25	46.23	46.28	139422	0.04	87747.9	0.07		41.57	41.56	41.6	34021.5	0.01	21790.4	0.02		42.91	42.85	43	5.28356e+07	0.25	1.50867e+07	0.24		43.29	43.17	43.33	2.73415e+08	1.66	7.43316e+07	1.51		43.51	43.45	43.58	509547	0.13	148657	0.14
46.31	46.28	46.33	136524	0.04	125501	0.1		41.62	41.6	41.65	47656.2	0.01	41982.2	0.04		43.02	43.01	43.03	91329.9	0	197642	0		43.36	43.33	43.42	1.06829e+08	0.65	3.57081e+07	0.73		43.6	43.58	43.63	114117	0.03	69074.9	0.07
46.39	46.36	46.42	396738	0.12	205139	0.17		41.67	41.65	41.68	15242.2	0	11779.1	0.01		43.06	43.03	43.09	513205	0	285444	0		43.51	43.45	43.58	1.15146e+08	0.7	3.98331e+07	0.81		43.66	43.63	43.7	168899	0.04	67045.8	0.06
46.56	46.51	46.64	3.89578e+06	1.14	1.06219e+06	0.86		41.72	41.71	41.74	12790.9	0	14019.9	0.01		43.1	43.1	43.13	118291	0	96850.1	0		43.68	43.58	43.72	2.44957e+07	0.15	5.67264e+06	0.12		43.71	43.7	43.72	11853.6	0	20081.3	0.02
46.67	46.64	46.69	563548	0.17	310019	0.25		41.76	41.74	41.77	11771.7	0	11655.9	0.01		43.3	43.19	43.33	1.42662e+08	0.69	3.9727e+07	0.62		43.78	43.73	43.83	4.45991e+07	0.27	1.64751e+07	0.34		43.78	43.73	43.84	285619	0.07	89899.7	0.09
46.74	46.71	46.82	1.00941e+06	0.3	338385	0.27		41.78	41.77	41.79	9701.91	0	12933.2	0.01		43.37	43.33	43.43	9.59458e+07	0.46	3.06519e+07	0.48		43.9	43.83	43.99	1.46068e+09	8.86	4.45097e+08	9.06		43.89	43.84	43.99	4.60493e+06	1.15	1.19862e+06	1.15
46.94	46.91	46.99	213911	0.06	104364	0.08		41.81	41.81	41.82	5566.47	0	11290	0.01		43.51	43.46	43.59	8.91546e+07	0.43	3.00384e+07	0.47		44.11	44.05	44.21	5.8277e+07	0.35	1.88268e+07	0.38		44	43.99	44.01	18875	0	29741.1	0.03
47.14	47.12	47.17	380968	0.11	191193	0.15		41.9	41.83	41.97	1.14284e+06	0.36	363143	0.32		43.64	43.59	43.73	1.18868e+07	0.06	2.32367e+06	0.04		44.38	44.26	44.45	2.97549e+09	18.04	9.065e+08	18.45		44.1	44.02	44.19	399707	0.1	83582.6	0.08
47.32	47.25	47.34	831000	0.24	323692	0.26		42	41.97	42.09	642700	0.2	185061	0.16		43.78	43.73	43.83	4.04357e+07	0.19	1.46922e+07	0.23		44.49	44.47	44.51	234224	0	236834	0		44.2	44.19	44.21	7870.73	0	12327.3	0.01
47.54	47.51	47.55	170092	0.05	142281	0.12		42.11	42.1	42.12	17046.8	0.01	25252.3	0.02		43.89	43.84	43.93	5.07742e+08	2.44	1.83504e+08	2.87		44.58	44.57	44.59	72512.5	0	126664	0		44.38	44.26	44.5	4.52218e+06	1.13	995552	0.96
47.58	47.55	47.64	451133	0.13	237292	0.19		42.18	42.12	42.23	128020	0.04	48916.5	0.04		43.96	43.93	44.01	3.87337e+08	1.86	1.40851e+08	2.21		44.61	44.59	44.63	788880	0	706096	0.01		44.51	44.5	44.52	14963.8	0	20122.4	0.02
47.89	47.8	47.9	547621	0.16	153612	0.12		42.24	42.23	42.29	86809.3	0.03	40062.3	0.04		44.11	44.04	44.2	4.35803e+07	0.21	1.26967e+07	0.2		44.72	44.64	44.82	4.88243e+08	2.96	1.29896e+08	2.64		44.54	44.53	44.57	40882.1	0.01	24486.1	0.02
48.04	48.03	48.07	477233	0.14	244310	0.2		42.32	42.29	42.33	29001.5	0.01	29481	0.03		44.22	44.21	44.23	96128.1	0	134192	0		44.86	44.83	44.92	1.45196e+07	0.09	6.12531e+06	0.12		44.58	44.58	44.6	12640	0	17991.3	0.02
48.14	48.07	48.17	7.75668e+06	2.28	2.59953e+06	2.1		42.34	42.33	42.35	16045.5	0.01	27278.1	0.02		44.4	44.28	44.47	4.78435e+09	23.02	1.45811e+09	22.84		45.05	44.95	45.13	1.20369e+09	7.3	3.71832e+08	7.57		44.61	44.6	44.62	17351.9	0	23495.8	0.02
48.48	48.42	48.5	452161	0.13	161054	0.13		42.38	42.35	42.39	44742.4	0.01	28696.7	0.03		44.5	44.48	44.51	232204	0	343730	0.01		45.21	45.18	45.25	1.08823e+07	0.07	4.67017e+06	0.1		44.72	44.62	44.81	1.75354e+06	0.44	355659	0.34
48.53	48.51	48.55	134367	0.04	86826.4	0.07		42.46	42.42	42.53	292350	0.09	87822.6	0.08		44.52	44.51	44.53	131515	0	265332	0		45.3	45.25	45.33	4.88456e+07	0.3	2.19387e+07	0.45		44.84	44.82	44.85	41237.6	0.01	40248	0.04
50.28	50.27	50.3	74612.3	0.02	109867	0.09		42.57	42.55	42.59	43375.7	0.01	25513.7	0.02		44.61	44.6	44.63	536876	0	485541	0.01		45.43	45.34	45.52	1.58665e+09	9.62	4.82584e+08	9.82		44.87	44.86	44.91	50545.8	0.01	33237.4	0.03
50.33	50.3	50.35	2.59905e+06	0.76	2.55452e+06	2.07		42.6	42.59	42.64	34614	0.01	31993.2	0.03		44.73	44.65	44.82	9.44921e+08	4.55	2.68054e+08	4.2		45.58	45.53	45.66	6.29877e+08	3.82	2.47007e+08	5.03		44.92	44.91	44.94	31365	0.01	34607.1	0.03
								42.71	42.64	42.8	1.16106e+06	0.36	331572	0.29		44.87	44.84	44.92	1.65767e+07	0.08	7.50841e+06	0.12		45.7	45.66	45.76	1.32327e+08	0.8	3.95447e+07	0.8		45.05	44.96	45.12	3.17643e+06	0.79	901929	0.87
								42.82	42.81	42.83	18440	0.01	23816.8	0.02		45.06	44.96	45.14	1.81023e+09	8.71	5.63726e+08	8.83		45.8	45.79	45.81	72768.7	0	173455	0		45.14	45.13	45.18	72991.3	0.02	48736.9	0.05
								42.91	42.83	43.04	750811	0.24	171989	0.15		45.22	45.18	45.28	4.26466e+07	0.21	1.59429e+07	0.25		45.86	45.82	45.89	1.52175e+06	0.01	808004	0.02		45.2	45.18	45.23	42765.3	0.01	30216.4	0.03
								43.05	43.04	43.07	25596.7	0.01	35955.7	0.03		45.3	45.28	45.34	8.03542e+06	0.04	3.86502e+06	0.06		46	45.93	46.11	9.46858e+08	5.74	2.71946e+08	5.53		45.3	45.23	45.32	145400	0.04	49500.6	0.05
								43.13	43.09	43.16	89888.9	0.03	55363	0.05		45.45	45.35	45.53	3.86294e+09	18.59	1.26468e+09	19.81		46.18	46.13	46.27	1.25187e+08	0.76	4.27728e+07	0.87		45.35	45.33	45.36	31902.5	0.01	29673.5	0.03
								43.17	43.16	43.18	12444.8	0	24480	0.02		45.59	45.55	45.63	1.10566e+08	0.53	4.51547e+07	0.71		46.32	46.27	46.34	1.26951e+07	0.08	4.55363e+06	0.09		45.45	45.36	45.51	3.78399e+06	0.95	931850	0.9
								43.2	43.18	43.21	39773.6	0.01	50013.3	0.04		45.71	45.63	45.79	2.92106e+08	1.41	6.96459e+07	1.09		46.39	46.34	46.45	4.97939e+07	0.3	1.7484e+07	0.36		45.56	45.55	45.57	15226.7	0	20542.8	0.02
								43.29	43.21	43.33	1.39502e+06	0.44	364970	0.32		45.86	45.83	45.89	2.02893e+06	0.01	1.00267e+06	0.02		46.55	46.46	46.63	8.18139e+08	4.96	1.93229e+08	3.93		45.59	45.57	45.61	249042	0.06	146050	0.14
								43.38	43.33	43.41	1.17008e+06	0.37	436440	0.38		46	45.94	46.11	1.72131e+09	8.28	5.68027e+08	8.9		46.68	46.63	46.78	2.83464e+08	1.72	1.01022e+08	2.06		45.67	45.61	45.72	1.16935e+06	0.29	348587	0.33
								43.42	43.41	43.43	15273.7	0	26294.8	0.02		46.19	46.14	46.27	8.12947e+07	0.39	2.84062e+07	0.44		46.95	46.82	47.04	7.01676e+08	4.25	1.85318e+08	3.77		45.76	45.72	45.79	99060.2	0.02	49212.2	0.05
								43.45	43.43	43.46	14138	0	19683.4	0.02		46.4	46.28	46.46	6.41533e+07	0.31	1.97753e+07	0.31		47.14	47.08	47.22	3.09231e+08	1.87	9.31379e+07	1.9		45.85	45.83	45.85	16481.3	0	15969.8	0.02
								43.53	43.46	43.59	1.02312e+06	0.32	328476	0.29		46.56	46.47	46.64	9.72919e+08	4.68	2.8755e+08	4.5		47.28	47.22	47.38	1.1131e+08	0.67	2.77581e+07	0.56		45.91	45.9	45.91	6053.31	0	12331.1	0.01
								43.64	43.59	43.66	385273	0.12	170851	0.15		46.68	46.64	46.79	1.93969e+08	0.93	5.14649e+07	0.81		47.4	47.39	47.4	63601.4	0	129991	0		46	45.95	46.05	4.75958e+06	1.19	1.29749e+06	1.25
								43.78	43.7	43.83	756369	0.24	248511	0.22		46.96	46.83	47.04	1.05398e+09	5.07	3.03357e+08	4.75		47.45	47.41	47.46	929440	0.01	460194	0.01		46.07	46.05	46.12	1.50891e+06	0.38	817058	0.78
								43.89	43.84	44	8.51414e+06	2.67	2.28525e+06	2		47.07	47.06	47.08	61385.3	0	154445	0		47.47	47.46	47.48	97189.1	0	199262	0		46.13	46.12	46.15	107403	0.03	113037	0.11
								44.02	44	44.05	59908.7	0.02	46522.1	0.04		47.15	47.09	47.23	3.55984e+08	1.71	1.12636e+08	1.76		47.56	47.49	47.68	4.11245e+08	2.49	8.58825e+07	1.75		46.19	46.16	46.32	2.69596e+06	0.67	723560	0.7
								44.11	44.06	44.2	858513	0.27	186977	0.16		47.29	47.23	47.39	2.03018e+08	0.98	5.475e+07	0.86		47.84	47.77	47.93	3.19966e+07	0.19	8.44332e+06	0.17		46.33	46.32	46.35	19226.7	0	21744.2	0.02
								44.22	44.2	44.23	50625.8	0.02	56433.8	0.05		47.4	47.39	47.41	76575.1	0	194609	0		48.01	47.95	48.06	1.25191e+08	0.76	3.42277e+07	0.7		46.4	46.36	46.45	1.54771e+06	0.39	612737	0.59
								44.25	44.23	44.26	28290.4	0.01	28232.1	0.02		47.47	47.41	47.48	1.3359e+06	0.01	632646	0.01		48.08	48.06	48.12	5.13704e+07	0.31	1.71143e+07	0.35		46.57	46.45	46.65	9.01215e+06	2.26	1.62311e+06	1.56
								44.38	44.27	44.47	7.42822e+06	2.33	1.41809e+06	1.24		47.58	47.5	47.68	4.62473e+08	2.23	1.04229e+08	1.63		48.14	48.12	48.2	4.91377e+07	0.3	1.41222e+07	0.29		46.71	46.65	46.81	1.90246e+06	0.48	421535	0.4
								44.48	44.47	44.52	204015	0.06	140293	0.12		47.73	47.72	47.74	100691	0	181162	0		48.21	48.21	48.22	55665.4	0	116370	0		46.86	46.81	46.88	483278	0.12	214806	0.21
								44.54	44.52	44.57	66929.6	0.02	32116.4	0.03		47.77	47.76	47.78	88495.8	0	214399	0		48.31	48.24	48.33	3.18683e+06	0.02	1.06306e+06	0.02		46.95	46.88	46.97	1.62706e+06	0.41	641042	0.62
								44.59	44.58	44.61	19572.8	0.01	24968.2	0.02		47.85	47.79	47.95	6.26145e+07	0.3	1.28508e+07	0.2		48.34	48.33	48.34	92467.9	0	157827	0		46.99	46.98	47.07	821502	0.21	272524	0.26
								44.73	44.62	44.83	4.94671e+06	1.55	1.01384e+06	0.89		47.97	47.96	47.97	98085.6	0	271539	0		48.35	48.35	48.36	124256	0	260884	0.01		47.15	47.07	47.21	1.64334e+06	0.41	489303	0.47
								44.83	44.83	44.85	23682.9	0.01	36881.2	0.03		48.02	47.97	48.05	5.2955e+07	0.25	1.73254e+07	0.27		48.47	48.36	48.55	2.92577e+07	0.18	6.03446e+06	0.12		47.29	47.21	47.32	732471	0.18	268102	0.26
								44.88	44.85	44.91	225717	0.07	97090	0.08		48.09	48.05	48.22	1.39828e+08	0.67	2.17682e+07	0.34		48.59	48.55	48.63	2.22704e+06	0.01	824016	0.02		47.35	47.32	47.4	111306	0.03	55847	0.05
								44.93	44.92	44.94	12309.3	0	22200.4	0.02		48.26	48.25	48.27	67549.5	0	103788	0		48.65	48.64	48.66	65775.9	0	146407	0		47.43	47.42	47.45	18023.3	0	17158.5	0.02
								44.95	44.94	44.96	16564.6	0.01	31708	0.03		48.29	48.28	48.32	961564	0	692799	0.01		48.67	48.66	48.68	103410	0	180406	0		47.48	47.46	47.52	51976.7	0.01	29293.2	0.03
								45.04	44.96	45.13	6.17287e+06	1.94	1.61687e+06	1.42		48.35	48.34	48.35	71786.9	0	173503	0		48.76	48.69	48.86	1.95088e+08	1.18	4.84528e+07	0.99		47.66	47.55	47.73	845378	0.21	188613	0.18
								45.15	45.13	45.19	155594	0.05	113619	0.1		48.47	48.36	48.6	2.77946e+07	0.13	5.16524e+06	0.08		48.9	48.86	48.95	2.08019e+06	0.01	921448	0.02		47.75	47.73	47.76	30922.6	0.01	28548.2	0.03
								45.21	45.19	45.26	585993	0.18	291892	0.26		48.61	48.6	48.62	117740	0	195550	0		48.96	48.95	48.97	83658.5	0	99251.2	0		47.77	47.76	47.79	25407	0.01	26154.5	0.03
								45.31	45.26	45.34	242319	0.08	143987	0.13		48.63	48.62	48.65	251962	0	261443	0		48.99	48.98	48.99	71371.9	0	163915	0		47.85	47.79	47.88	600662	0.15	180294	0.17
								45.44	45.35	45.54	1.40624e+07	4.41	3.17499e+06	2.78		48.66	48.65	48.68	89678	0	103260	0		49.06	49	49.18	8.94604e+06	0.05	1.58695e+06	0.03		47.9	47.88	47.94	214128	0.05	115339	0.11
								45.59	45.54	45.64	1.54552e+06	0.49	842288	0.74		48.78	48.71	48.88	2.50309e+08	1.2	6.19049e+07	0.97		49.21	49.18	49.23	961638	0.01	572000	0.01		47.96	47.94	47.97	119756	0.03	111302	0.11
								45.72	45.65	45.84	2.41312e+06	0.76	540617	0.47		48.91	48.89	48.94	1.36363e+06	0.01	819424	0.01		49.31	49.25	49.43	2.03149e+07	0.12	4.09823e+06	0.08		48.02	47.97	48.06	880929	0.22	317344	0.3
								45.89	45.85	45.92	127680	0.04	43612.9	0.04		48.95	48.94	48.96	50340	0	117564	0		49.45	49.44	49.46	246667	0	401026	0.01		48.14	48.06	48.2	1.73992e+06	0.44	333640	0.32
								45.93	45.92	45.94	8136.6	0	20667.8	0.02		48.97	48.96	48.98	44125	0	63767.8	0		49.54	49.47	49.61	6.16347e+07	0.37	1.35096e+07	0.27		48.21	48.2	48.26	216507	0.05	135756	0.13
								46	45.94	46.05	6.94964e+06	2.18	2.17459e+06	1.9		49.01	49	49.02	129508	0	245428	0		49.68	49.61	49.78	7.86663e+07	0.48	1.69979e+07	0.35		48.28	48.27	48.29	7442.01	0	14545.9	0.01
								46.07	46.05	46.15	1.69262e+06	0.53	603884	0.53		49.09	49.02	49.21	5.86569e+06	0.03	1.11342e+06	0.02		49.81	49.78	49.82	382884	0	331036	0.01		48.31	48.29	48.33	51930.8	0.01	43085.3	0.04
								46.2	46.15	46.29	2.50255e+06	0.79	764232	0.67		49.22	49.21	49.25	741016	0	538328	0.01		49.83	49.82	49.84	61374.4	0	114045	0		48.45	48.4	48.47	245084	0.06	91479.9	0.09
								46.31	46.29	46.35	213476	0.07	128580	0.11		49.32	49.25	49.41	1.33537e+07	0.06	3.0204e+06	0.05		49.84	49.84	49.85	57639.6	0	129021	0		48.5	48.47	48.57	248931	0.06	81740.1	0.08
								46.4	46.35	46.45	655771	0.21	220166	0.19		49.43	49.41	49.45	387778	0	328653	0.01		49.86	49.85	49.86	62958.3	0	152452	0		48.6	48.58	48.61	22238.4	0.01	20230	0.02
								46.58	46.49	46.61	8.65025e+06	2.72	2.50773e+06	2.19		49.46	49.46	49.47	61605.7	0	135094	0		49.94	49.86	49.99	4.86031e+06	0.03	1.10921e+06	0.02		48.62	48.61	48.66	23801.3	0.01	24812.8	0.02
								46.69	46.61	46.82	9.82912e+06	3.09	1.54693e+06	1.35		49.55	49.47	49.61	2.5229e+07	0.12	5.28111e+06	0.08		50.04	49.99	50.12	4.01995e+06	0.02	835851	0.02		48.67	48.66	48.7	18072.4	0	18949.3	0.02
								46.96	46.83	47.08	9.37303e+06	2.94	2.02047e+06	1.77		49.69	49.61	49.79	2.7491e+07	0.13	5.17494e+06	0.08		50.14	50.12	50.15	84114.6	0	136178	0		48.71	48.7	48.72	9853.23	0	13757.2	0.01
								47.14	47.09	47.22	3.72368e+06	1.17	936960	0.82		49.8	49.79	49.81	148472	0	223881	0		50.17	50.15	50.18	201188	0	230686	0		48.77	48.73	48.84	794950	0.2	355963	0.34
								47.26	47.22	47.31	1.58971e+06	0.5	437161	0.38		49.82	49.81	49.83	222383	0	250765	0		50.29	50.19	50.4	7.53819e+07	0.46	1.5492e+07	0.32		48.97	48.85	49.01	628368	0.16	132249	0.13
								47.35	47.31	47.49	1.92344e+06	0.6	420144	0.37		49.85	49.83	49.86	290933	0	281079	0		50.42	50.41	50.44	354514	0	367964	0.01		49.08	49.03	49.1	110923	0.03	87567.6	0.08
								47.57	47.5	47.66	9.56913e+06	3	2.21647e+06	1.94		49.95	49.86	50.03	6.02459e+06	0.03	1.20878e+06	0.02		50.45	50.44	50.46	222367	0	243440	0		49.12	49.11	49.14	21084.5	0.01	27470	0.03
								47.67	47.66	47.67	9626.74	0	20415.3	0.02		50.07	50.03	50.19	4.68879e+06	0.02	1.03431e+06	0.02		50.48	50.46	50.5	556265	0	419903	0.01		49.17	49.16	49.2	66984.7	0.02	42231.1	0.04
								47.68	47.67	47.69	26933.7	0.01	41922.7	0.04		50.2	50.19	50.21	217467	0	332130	0.01		50.52	50.5	50.53	387860	0	354508	0.01		49.21	49.2	49.23	18396.6	0	20088	0.02
								47.71	47.7	47.72	21905.8	0.01	31597.9	0.03		50.3	50.21	50.41	5.6244e+07	0.27	1.17856e+07	0.18		50.55	50.53	50.57	532739	0	289340	0.01		49.32	49.25	49.37	301515	0.08	88094.6	0.08
								47.75	47.73	47.77	154831	0.05	121208	0.11		50.42	50.41	50.42	64542	0	101327	0		50.59	50.57	50.61	495546	0	331233	0.01		49.38	49.37	49.39	49993.3	0.01	59172.5	0.06
								47.85	47.77	47.91	2.4475e+06	0.77	591067	0.52		50.44	50.42	50.44	129853	0	188712	0										49.42	49.39	49.47	222034	0.06	64239.4	0.06
								47.93	47.91	47.98	708311	0.22	322890	0.28		50.52	50.45	50.59	2.52708e+06	0.01	724960	0.01										49.48	49.47	49.49	18379.9	0	21883.7	0.02
								48.03	47.98	48.04	681238	0.21	255701	0.22																		49.55	49.5	49.63	822407	0.21	206733	0.2
								48.07	48.04	48.09	602362	0.19	334946	0.29																		49.67	49.63	49.71	287079	0.07	123161	0.12
								48.1	48.09	48.11	11538.6	0	22111.4	0.02																		49.72	49.71	49.73	16419.3	0	29228.7	0.03
								48.14	48.11	48.16	564807	0.18	256259	0.22																		49.79	49.77	49.84	40559.1	0.01	21230.2	0.02
								48.18	48.16	48.22	514128	0.16	253304	0.22																		49.89	49.88	49.9	12771.2	0	20588.9	0.02
								48.24	48.22	48.26	324731	0.1	157329	0.14																		49.94	49.9	49.96	100106	0.03	62379.9	0.06
								48.29	48.26	48.37	950458	0.3	229367	0.2																		49.99	49.96	50	55999.1	0.01	33771.5	0.03
								48.38	48.37	48.4	293102	0.09	179190	0.16																		50.08	50	50.1	153083	0.04	47922.6	0.05
								48.44	48.4	48.47	481679	0.15	178229	0.16																		50.11	50.1	50.13	20442.9	0.01	23853.6	0.02
								48.64	48.61	48.66	105724	0.03	57091.5	0.05																		50.28	50.14	50.34	1.09653e+06	0.27	268019	0.26
								48.81	48.8	48.83	12730.8	0	12656.9	0.01																		50.35	50.34	50.36	9317.93	0	16840.3	0.02
								48.84	48.83	48.85	11808.5	0	18305.4	0.02																		50.38	50.37	50.39	11070.7	0	13667.5	0.01
								49.18	49.16	49.2	28048	0.01	25963.8	0.02																		50.41	50.39	50.43	91004.4	0.02	57782.6	0.06
								49.28	49.27	49.29	14434	0	17016.3	0.01																		50.46	50.43	50.51	188547	0.05	61804.6	0.06
								49.37	49.36	49.38	8263.39	0	12777.1	0.01																		50.55	50.51	50.58	130355	0.03	57587.4	0.06
								49.78	49.7	49.8	108369	0.03	41589.8	0.04
								49.83	49.8	49.84	81763.4	0.03	51434.6	0.05
								49.89	49.84	49.9	125039	0.04	66575.5	0.06
								49.92	49.92	49.95	23083.7	0.01	16827.8	0.01
								49.97	49.95	49.98	6364.6	0	6810.32	0.01
								50.09	50.07	50.1	12277.4	0	16298.6	0.01
								50.15	50.12	50.16	14766.2	0	11573.8	0.01
								50.26	50.19	50.29	337756	0.11	145460	0.13
								50.32	50.29	50.35	96832.1	0.03	65281.8	0.06
								50.49	50.46	50.5	67544.4	0.02	49393	0.04
								50.53	50.5	50.54	38211.5	0.01	35089.6	0.03
								50.57	50.54	50.59	55639.8	0.02	32457.5	0.03

## Sheet: Trophallactic Fluid
PEAK LIST								PEAK LIST								PEAK LIST								PEAK LIST								PEAK LIST
tfb10a.raw								tfb13.raw								tfb21.raw								TF334.raw								tfb52.raw
RT: 40.00 - 50.63								RT: 40.00 - 50.63								RT: 40.00 - 50.63								RT: 40.00 - 50.63								RT: 40.00 - 50.60
Number of detected peaks: 125								Number of detected peaks: 89								Number of detected peaks: 111								Number of detected peaks: 57								Number of detected peaks: 58
Apex RT	Start RT	End RT	Area	%Area	Height	%Height		Apex RT	Start RT	End RT	Area	%Area	Height	%Height		Apex RT	Start RT	End RT	Area	%Area	Height	%Height		Apex RT	Start RT	End RT	Area	%Area	Height	%Height		Apex RT	Start RT	End RT	Area	%Area	Height	%Height
40.05	39.98	40.12	8.09959e+06	0.21	1.72646e+06	0.15		40.05	39.96	40.13	2.32294e+08	0.16	6.22418e+07	0.17		40.05	39.96	40.13	1.57733e+08	0.24	3.60527e+07	0.21		40.05	39.97	40.13	7.44754e+07	0.18	1.72436e+07	0.15		40.04	39.97	40.11	1.90797e+07	0.08	4.41299e+06	0.06
40.18	40.12	40.28	5.28712e+06	0.14	1.30033e+06	0.12		40.19	40.18	40.22	689921	0	431129	0		40.15	40.14	40.16	230982	0	325072	0		40.29	40.26	40.35	2.19565e+06	0.01	579478	0		40.61	40.55	40.68	2.00401e+07	0.09	4.49635e+06	0.06
40.29	40.28	40.31	151135	0	193997	0.02		40.3	40.24	40.41	1.61584e+07	0.01	3.69004e+06	0.01		40.17	40.16	40.18	99893	0	166939	0		40.38	40.35	40.42	1.64079e+06	0	640430	0.01		40.76	40.68	40.84	3.50801e+07	0.15	7.51673e+06	0.1
40.39	40.31	40.46	2.23824e+06	0.06	538904	0.05		40.5	40.42	40.53	2.91392e+06	0	940485	0		40.2	40.18	40.21	199771	0	216488	0		40.63	40.57	40.69	2.30621e+07	0.06	4.33292e+06	0.04		41.34	41.27	41.43	2.49394e+07	0.11	5.70178e+06	0.08
40.47	40.47	40.49	65568.1	0	89930.1	0.01		40.62	40.55	40.68	2.51148e+07	0.02	6.91154e+06	0.02		40.3	40.23	40.44	7.1663e+06	0.01	1.27628e+06	0.01		40.77	40.69	40.84	3.88605e+07	0.09	7.31572e+06	0.06		41.54	41.5	41.61	9.55464e+06	0.04	2.79096e+06	0.04
40.5	40.49	40.52	67841.3	0	55995.9	0		40.77	40.69	40.86	1.39958e+08	0.09	3.52351e+07	0.1		40.47	40.46	40.48	109555	0	162978	0		41.13	41.08	41.19	4.98988e+06	0.01	1.40842e+06	0.01		41.87	41.82	41.91	4.92566e+07	0.22	1.40889e+07	0.2
40.63	40.55	40.71	2.80159e+07	0.72	6.63622e+06	0.59		40.87	40.86	40.88	140583	0	231717	0		40.49	40.48	40.51	135378	0	156249	0		41.36	41.28	41.49	5.55334e+07	0.14	8.52449e+06	0.07		41.98	41.91	42.06	1.7039e+08	0.75	4.42532e+07	0.62
40.77	40.71	40.83	1.63284e+06	0.04	510943	0.05		40.91	40.89	41	2.89263e+06	0	569055	0		40.53	40.52	40.53	49030.1	0	76042.8	0		41.55	41.49	41.66	4.94621e+07	0.12	1.05741e+07	0.09		42.23	42.12	42.29	2.90492e+07	0.13	7.17645e+06	0.1
40.84	40.83	40.86	70924.2	0	93392.1	0.01		41.02	41.01	41.03	173905	0	209777	0		40.62	40.55	40.71	3.90498e+07	0.06	6.16613e+06	0.04		41.88	41.81	41.95	2.09432e+08	0.51	5.92721e+07	0.51		42.45	42.33	42.54	1.54236e+08	0.68	4.43508e+07	0.62
40.87	40.86	40.88	42465.5	0	68522.4	0.01		41.12	41.05	41.22	4.67046e+07	0.03	1.1555e+07	0.03		40.75	40.71	40.86	4.85528e+07	0.07	1.02472e+07	0.06		41.99	41.95	42.06	4.37779e+07	0.11	1.11423e+07	0.1		42.69	42.63	42.76	6.75017e+07	0.3	2.09383e+07	0.29
40.95	40.88	40.98	839361	0.02	265776	0.02		41.36	41.28	41.5	1.34444e+08	0.09	2.79195e+07	0.08		40.92	40.88	40.98	1.20432e+06	0	370308	0		42.23	42.13	42.32	1.47702e+08	0.36	3.92222e+07	0.34		42.79	42.76	42.81	3.51299e+06	0.02	1.52343e+06	0.02
40.99	40.98	41.01	391058	0.01	360027	0.03		41.56	41.51	41.67	2.26417e+07	0.02	4.92254e+06	0.01		40.99	40.98	41.01	224923	0	194733	0		42.47	42.38	42.55	3.48982e+08	0.85	1.07286e+08	0.92		42.89	42.83	42.97	5.19388e+07	0.23	1.48677e+07	0.21
41.03	41.01	41.04	101997	0	110857	0.01		41.68	41.67	41.7	712859	0	535622	0		41.05	41.03	41.06	135365	0	174699	0		42.7	42.64	42.83	1.38001e+08	0.34	4.16674e+07	0.36		43.28	43.11	43.32	1.38006e+08	0.61	2.54069e+07	0.35
41.06	41.05	41.06	82219	0	121206	0.01		41.77	41.7	41.8	5.23565e+06	0	1.50638e+06	0		41.13	41.06	41.2	5.56376e+06	0.01	1.32803e+06	0.01		42.9	42.84	42.99	7.66978e+07	0.19	2.30443e+07	0.2		43.35	43.32	43.41	4.39032e+07	0.19	1.43446e+07	0.2
41.07	41.06	41.09	283049	0.01	248190	0.02		41.89	41.82	41.94	5.51585e+08	0.37	1.54446e+08	0.43		41.25	41.23	41.26	169517	0	167199	0		43.29	43.17	43.34	5.58953e+08	1.36	1.38651e+08	1.19		43.5	43.45	43.57	2.05949e+07	0.09	6.55921e+06	0.09
41.14	41.09	41.18	1.24009e+06	0.03	380072	0.03		41.99	41.94	42.06	9.99896e+08	0.67	2.72881e+08	0.75		41.27	41.26	41.28	59875.7	0	133248	0		43.36	43.34	43.4	1.20837e+08	0.29	4.8634e+07	0.42		43.62	43.57	43.69	6.92481e+06	0.03	1.57767e+06	0.02
41.19	41.18	41.2	127407	0	214394	0.02		42.09	42.08	42.1	205358	0	426200	0		41.35	41.28	41.5	5.34545e+07	0.08	1.0468e+07	0.06		43.51	43.45	43.56	7.21631e+07	0.18	2.46723e+07	0.21		43.77	43.72	43.82	5.3253e+07	0.23	1.81522e+07	0.25
41.21	41.2	41.21	35619.5	0	82750.6	0.01		42.24	42.12	42.33	1.92318e+08	0.13	4.26842e+07	0.12		41.54	41.5	41.67	7.56598e+06	0.01	1.56413e+06	0.01		43.68	43.6	43.73	2.94718e+07	0.07	8.03636e+06	0.07		43.88	43.83	43.9	1.06373e+08	0.47	4.40235e+07	0.61
41.24	41.22	41.26	310683	0.01	194186	0.02		42.38	42.36	42.39	886014	0	1.12011e+06	0		41.69	41.67	41.7	248813	0	273959	0		43.78	43.73	43.84	1.25197e+08	0.31	4.43799e+07	0.38		43.94	43.9	44	1.82238e+08	0.8	6.61535e+07	0.92
41.35	41.26	41.46	6.54259e+06	0.17	1.28554e+06	0.11		42.48	42.39	42.56	1.95708e+09	1.31	5.75802e+08	1.59		41.71	41.7	41.72	106994	0	166744	0		43.9	43.85	43.92	3.81048e+08	0.93	1.45565e+08	1.25		44.09	44.04	44.18	4.61627e+07	0.2	1.34647e+07	0.19
41.49	41.48	41.52	257078	0.01	212525	0.02		42.58	42.56	42.6	711207	0	513598	0		41.76	41.74	41.78	315052	0	313732	0		43.96	43.92	44.01	4.93062e+08	1.2	1.72143e+08	1.47		44.38	44.27	44.45	2.90556e+09	12.74	8.9932e+08	12.54
41.54	41.52	41.62	1.15089e+06	0.03	393588	0.03		42.71	42.64	42.77	5.88262e+08	0.39	2.04666e+08	0.57		41.79	41.78	41.8	100496	0	154005	0		44.12	44.06	44.21	1.82624e+08	0.45	5.84243e+07	0.5		44.48	44.46	44.51	2.55782e+06	0.01	1.53975e+06	0.02
41.64	41.63	41.67	161419	0	122643	0.01		42.8	42.77	42.83	4.03014e+07	0.03	1.23347e+07	0.03		41.88	41.81	41.93	3.08339e+08	0.47	9.54104e+07	0.54		44.42	44.29	44.48	6.43929e+09	15.71	1.8852e+09	16.13		44.71	44.64	44.82	9.49435e+08	4.16	2.83005e+08	3.95
41.68	41.67	41.69	43046	0	81930	0.01		42.91	42.83	42.98	6.98911e+08	0.47	2.19581e+08	0.61		41.98	41.93	42.06	3.14135e+08	0.47	8.79779e+07	0.5		44.52	44.5	44.53	1.66249e+06	0	1.45642e+06	0.01		44.87	44.84	44.89	2.20799e+06	0.01	1.28357e+06	0.02
41.71	41.69	41.75	354493	0.01	209668	0.02		43	42.99	43.01	148672	0	276430	0		42.07	42.06	42.08	153422	0	298070	0		44.63	44.6	44.65	5.90382e+06	0.01	4.0386e+06	0.03		45.03	44.94	45.12	9.4237e+08	4.13	2.17824e+08	3.04
41.76	41.75	41.77	166938	0	203132	0.02		43.06	43.04	43.1	2.06694e+06	0	1.18399e+06	0		42.11	42.1	42.12	159976	0	226690	0		44.74	44.66	44.83	1.63785e+09	4	4.62618e+08	3.96		45.21	45.17	45.25	2.25827e+07	0.1	9.98047e+06	0.14
41.87	41.78	41.93	2.65282e+07	0.68	5.90344e+06	0.52		43.15	43.14	43.17	668107	0	1.04796e+06	0		42.16	42.12	42.19	1.61659e+07	0.02	5.56276e+06	0.03		44.88	44.86	44.9	6.06553e+06	0.01	3.70766e+06	0.03		45.29	45.26	45.32	1.22939e+07	0.05	6.65505e+06	0.09
41.99	41.93	42.09	1.49255e+07	0.38	2.93431e+06	0.26		43.3	43.17	43.34	1.05119e+09	0.71	3.04509e+08	0.84		42.23	42.19	42.32	3.67488e+07	0.06	8.61142e+06	0.05		45.02	44.95	45.13	1.62723e+09	3.97	3.72619e+08	3.19		45.43	45.37	45.46	2.43618e+09	10.68	8.84776e+08	12.34
42.1	42.09	42.11	121146	0	160065	0.01		43.37	43.34	43.42	4.21882e+08	0.28	1.63571e+08	0.45		42.35	42.35	42.36	137084	0	294307	0		45.22	45.18	45.26	3.52541e+07	0.09	1.63256e+07	0.14		45.5	45.46	45.54	4.60007e+09	20.17	1.66717e+09	23.25
42.13	42.12	42.14	184465	0	211906	0.02		43.51	43.44	43.58	2.01035e+08	0.13	6.23063e+07	0.17		42.37	42.36	42.38	81560.2	0	169872	0		45.3	45.26	45.34	7.24375e+07	0.18	3.38378e+07	0.29		45.58	45.57	45.59	2.58532e+06	0.01	3.80805e+06	0.05
42.16	42.14	42.2	1.11016e+06	0.03	509695	0.05		43.68	43.58	43.73	8.41581e+07	0.06	1.59813e+07	0.04		42.47	42.38	42.55	8.72745e+08	1.32	2.59042e+08	1.48		45.45	45.37	45.47	4.24925e+09	10.37	1.38423e+09	11.84		45.7	45.61	45.77	3.27291e+08	1.43	9.95944e+07	1.39
42.25	42.2	42.32	1.81404e+06	0.05	532296	0.05		43.79	43.73	43.85	5.66691e+08	0.38	2.09081e+08	0.58		42.59	42.56	42.62	2.48756e+06	0	1.08364e+06	0.01		45.54	45.47	45.59	1.0001e+10	24.4	2.60035e+09	22.25		45.83	45.82	45.85	1.08477e+06	0	976091	0.01
42.33	42.32	42.34	75937	0	137354	0.01		43.9	43.86	43.93	9.44439e+08	0.63	3.37408e+08	0.93		42.7	42.63	42.76	1.34647e+08	0.2	4.45323e+07	0.25		45.7	45.63	45.79	4.69281e+08	1.14	1.63712e+08	1.4		45.86	45.85	45.88	1.3562e+06	0.01	957600	0.01
42.36	42.35	42.37	77256.9	0	95199.6	0.01		43.97	43.93	44.02	2.14851e+09	1.44	7.76384e+08	2.15		42.79	42.76	42.83	7.14731e+06	0.01	2.83239e+06	0.02		45.85	45.83	45.88	3.90899e+06	0.01	2.2675e+06	0.02		45.99	45.92	46.09	1.91993e+09	8.42	6.48511e+08	9.04
42.46	42.37	42.63	4.66263e+07	1.19	1.14513e+07	1.02		44.12	44.05	44.2	4.79429e+08	0.32	1.5675e+08	0.43		42.9	42.83	42.99	2.2451e+08	0.34	6.48073e+07	0.37		46	45.93	46.1	3.1093e+09	7.59	1.01174e+09	8.66		46.18	46.13	46.25	3.69627e+07	0.16	9.5358e+06	0.13
42.7	42.64	42.77	9.30945e+06	0.24	2.76942e+06	0.25		44.33	44.32	44.33	417624	0	1.25248e+06	0		43.02	43.01	43.03	116819	0	200299	0		46.19	46.15	46.26	5.53624e+07	0.14	1.6145e+07	0.14		46.28	46.25	46.32	8.51912e+06	0.04	2.86715e+06	0.04
42.79	42.77	42.83	823285	0.02	430634	0.04		44.47	44.35	44.51	1.81565e+10	12.18	3.95482e+09	10.93		43.06	43.03	43.07	299816	0	279668	0		46.31	46.27	46.34	2.02346e+07	0.05	8.05847e+06	0.07		46.38	46.33	46.44	5.93682e+07	0.26	2.175e+07	0.3
42.9	42.83	42.99	1.56594e+07	0.4	4.08112e+06	0.36		44.53	44.51	44.56	1.08491e+08	0.07	7.79798e+07	0.22		43.09	43.08	43.1	210675	0	285289	0		46.39	46.34	46.45	1.27614e+08	0.31	4.31526e+07	0.37		46.54	46.46	46.62	7.32642e+08	3.21	2.30961e+08	3.22
43	42.99	43.02	145917	0	180054	0.02		44.78	44.69	44.86	1.11366e+10	7.47	2.53347e+09	7		43.15	43.14	43.16	112857	0	217817	0		46.56	46.48	46.63	1.44954e+09	3.54	3.55381e+08	3.04		46.67	46.62	46.78	3.51423e+08	1.54	9.77255e+07	1.36
43.04	43.03	43.05	95620.8	0	158928	0.01		44.89	44.87	44.93	2.47547e+07	0.02	1.45931e+07	0.04		43.29	43.17	43.33	4.95603e+08	0.75	1.46113e+08	0.83		46.69	46.63	46.78	1.24861e+09	3.05	4.11388e+08	3.52		46.94	46.81	47.01	7.16649e+08	3.14	1.81597e+08	2.53
43.07	43.05	43.08	163606	0	228360	0.02		45.05	44.98	45.15	8.56994e+09	5.75	1.78732e+09	4.94		43.36	43.33	43.41	1.51087e+08	0.23	5.15683e+07	0.29		46.96	46.82	47.02	1.16381e+09	2.84	2.67934e+08	2.29		47.13	47.07	47.21	5.57491e+08	2.44	1.8998e+08	2.65
43.11	43.09	43.12	240375	0.01	263369	0.02		45.24	45.19	45.28	4.10217e+08	0.28	1.85066e+08	0.51		43.43	43.42	43.44	67424.2	0	137882	0		47.15	47.08	47.23	1.43283e+09	3.5	4.88943e+08	4.18		47.27	47.21	47.37	2.49238e+08	1.09	6.39169e+07	0.89
43.16	43.13	43.23	1.98408e+06	0.05	752587	0.07		45.32	45.28	45.35	1.14357e+08	0.08	5.49685e+07	0.15		43.51	43.44	43.58	1.12895e+08	0.17	3.65651e+07	0.21		47.28	47.23	47.38	3.01814e+08	0.74	8.20247e+07	0.7		47.57	47.48	47.66	1.18295e+09	5.19	2.94827e+08	4.11
43.29	43.23	43.41	3.21036e+07	0.82	7.23527e+06	0.64		45.51	45.41	45.59	2.61009e+10	17.51	5.10517e+09	14.11		43.69	43.59	43.72	2.25198e+07	0.03	5.93133e+06	0.03		47.58	47.49	47.67	1.63752e+09	3.99	4.08079e+08	3.49		47.71	47.69	47.73	1.56047e+06	0.01	829168	0.01
43.43	43.42	43.44	191461	0	274838	0.02		45.61	45.6	45.63	3.80864e+07	0.03	3.10353e+07	0.09		43.78	43.72	43.83	1.83045e+08	0.28	6.20201e+07	0.35		47.83	47.78	47.93	6.38237e+07	0.16	1.67183e+07	0.14		47.82	47.76	47.93	8.78957e+07	0.39	2.05602e+07	0.29
43.5	43.46	43.6	1.2713e+07	0.33	2.72195e+06	0.24		45.74	45.64	45.82	4.85862e+09	3.26	1.33742e+09	3.7		43.89	43.85	43.91	3.06004e+08	0.46	1.31623e+08	0.75		48.01	47.95	48.11	4.09476e+08	1	9.87039e+07	0.84		48	47.95	48.04	1.19222e+08	0.52	3.42285e+07	0.48
43.6	43.6	43.69	4.51957e+06	0.12	1.31127e+06	0.12		45.88	45.84	45.91	1.76787e+07	0.01	8.84154e+06	0.02		43.96	43.91	44.01	1.3473e+09	2.03	4.82088e+08	2.75		48.16	48.11	48.26	2.21886e+08	0.54	3.88465e+07	0.33		48.07	48.04	48.16	1.72214e+08	0.75	3.13132e+07	0.44
43.77	43.72	43.83	1.06042e+07	0.27	3.73103e+06	0.33		45.91	45.91	45.92	141083	0	373721	0		44.11	44.04	44.21	1.94985e+08	0.29	5.91145e+07	0.34		48.47	48.38	48.56	7.96804e+07	0.19	1.85974e+07	0.16		48.19	48.16	48.25	7.16212e+07	0.31	2.02194e+07	0.28
43.94	43.84	44.03	7.70736e+07	1.97	2.02502e+07	1.8		46.06	45.96	46.13	1.41297e+10	9.48	3.55626e+09	9.83		44.23	44.23	44.24	62253.4	0	134938	0		48.77	48.69	48.87	6.47969e+08	1.58	1.77277e+08	1.52		48.45	48.37	48.54	3.62402e+07	0.16	7.52338e+06	0.1
44.1	44.04	44.2	1.72613e+07	0.44	4.01743e+06	0.36		46.21	46.16	46.28	4.33342e+08	0.29	1.27921e+08	0.35		44.29	44.28	44.29	112778	0	297747	0		49.06	49.01	49.18	3.07045e+07	0.07	6.60129e+06	0.06		48.76	48.69	48.86	6.01828e+08	2.64	1.68366e+08	2.35
44.22	44.21	44.22	59571.4	0	138753	0.01		46.31	46.28	46.36	1.45575e+08	0.1	5.19979e+07	0.14		44.42	44.3	44.48	1.04742e+10	15.8	2.71829e+09	15.52		49.31	49.25	49.43	3.37029e+07	0.08	7.20685e+06	0.06		49.05	48.99	49.15	2.11162e+07	0.09	4.95737e+06	0.07
44.36	44.25	44.44	5.71731e+08	14.62	1.70245e+08	15.1		46.41	46.36	46.47	6.76209e+08	0.45	2.47993e+08	0.69		44.5	44.49	44.53	6.79759e+06	0.01	5.10194e+06	0.03		49.54	49.47	49.61	1.15722e+08	0.28	2.49737e+07	0.21		49.3	49.24	49.4	2.61219e+07	0.11	6.3026e+06	0.09
44.48	44.46	44.51	1.50918e+06	0.04	687319	0.06		46.6	46.5	46.66	6.16609e+09	4.14	1.64352e+09	4.54		44.61	44.59	44.63	1.15888e+06	0	878859	0.01		49.67	49.61	49.77	1.78155e+08	0.43	3.70946e+07	0.32		49.52	49.46	49.59	4.48249e+07	0.2	9.4141e+06	0.13
44.53	44.52	44.54	146556	0	146992	0.01		46.71	46.66	46.82	2.7836e+09	1.87	7.14405e+08	1.97		44.74	44.65	44.83	4.13835e+09	6.24	1.09497e+09	6.25		49.93	49.88	49.98	4.84808e+06	0.01	1.08346e+06	0.01		49.66	49.59	49.77	7.54335e+07	0.33	1.54663e+07	0.22
44.56	44.55	44.57	117944	0	219897	0.02		46.98	46.84	47.05	5.27139e+09	3.54	1.14633e+09	3.17		44.87	44.85	44.91	1.50238e+07	0.02	8.62878e+06	0.05		50.04	49.98	50.09	5.436e+06	0.01	1.21837e+06	0.01		49.88	49.87	49.9	1.01406e+06	0	904688	0.01
44.59	44.57	44.63	639690	0.02	471755	0.04		47.09	47.06	47.1	1.99936e+07	0.01	1.37963e+07	0.04		45.02	44.95	45.13	3.92833e+09	5.93	8.47896e+08	4.84		50.28	50.2	50.38	2.13859e+08	0.52	5.92889e+07	0.51		49.97	49.9	50.07	1.02547e+07	0.04	1.48392e+06	0.02
44.71	44.63	44.82	1.88889e+08	4.83	4.98503e+07	4.42		47.18	47.11	47.25	4.57408e+09	3.07	1.39052e+09	3.84		45.22	45.17	45.27	1.51179e+08	0.23	6.06586e+07	0.35										50.27	50.19	50.37	1.86781e+08	0.82	4.34103e+07	0.61
44.86	44.84	44.92	1.1457e+06	0.03	492889	0.04		47.31	47.25	47.4	2.63113e+09	1.76	7.40381e+08	2.05		45.3	45.27	45.33	2.45569e+07	0.04	1.15074e+07	0.07
44.93	44.92	44.93	57734.6	0	126067	0.01		47.41	47.41	47.42	289104	0	688604	0		45.47	45.38	45.55	1.39302e+10	21.02	3.00053e+09	17.13
45	44.94	45.1	1.34853e+08	3.45	3.23024e+07	2.86		47.47	47.44	47.49	3.67098e+06	0	2.10997e+06	0.01		45.58	45.57	45.59	3.07802e+06	0	4.43931e+06	0.03
45.13	45.12	45.14	117386	0	191653	0.02		47.62	47.52	47.71	8.06466e+09	5.41	1.75166e+09	4.84		45.71	45.62	45.79	1.53797e+09	2.32	4.47472e+08	2.55
45.2	45.16	45.26	9.95401e+06	0.25	3.87941e+06	0.34		47.75	47.73	47.78	4.42859e+06	0	3.81859e+06	0.01		45.8	45.8	45.81	270824	0	519708	0
45.29	45.26	45.32	2.26541e+06	0.06	1.05241e+06	0.09		47.86	47.8	47.97	9.17126e+08	0.62	2.08115e+08	0.58		45.86	45.82	45.89	1.02337e+07	0.02	4.87809e+06	0.03
45.42	45.35	45.53	6.20782e+08	15.87	1.40449e+08	12.46		48.04	47.99	48.07	5.69387e+08	0.38	1.74881e+08	0.48		46.02	45.94	46.1	7.44987e+09	11.24	2.22967e+09	12.73
45.56	45.55	45.57	120533	0	285498	0.03		48.11	48.07	48.22	1.62126e+09	1.09	2.91008e+08	0.8		46.19	46.15	46.27	9.02757e+07	0.14	3.01085e+07	0.17
45.69	45.57	45.76	9.24955e+07	2.36	1.64549e+07	1.46		48.24	48.22	48.29	2.72683e+08	0.18	1.01087e+08	0.28		46.39	46.28	46.46	2.81757e+08	0.43	8.33713e+07	0.48
45.78	45.77	45.79	171582	0	257159	0.02		48.32	48.31	48.32	124423	0	269914	0		46.57	46.48	46.63	2.46947e+09	3.73	7.79516e+08	4.45
45.8	45.79	45.81	265576	0.01	476387	0.04		48.36	48.34	48.36	422139	0	423651	0		46.68	46.63	46.79	9.30145e+08	1.4	2.95637e+08	1.69
45.85	45.81	45.9	1.64511e+06	0.04	622219	0.06		48.48	48.38	48.56	2.47012e+08	0.17	4.70992e+07	0.13		46.96	46.82	47.03	2.55873e+09	3.86	6.30524e+08	3.6
45.98	45.91	46.08	3.207e+08	8.2	1.17045e+08	10.38		48.6	48.57	48.66	5.81467e+06	0	1.88653e+06	0.01		47.06	47.04	47.07	716112	0	754652	0
46.09	46.09	46.1	97275.4	0	226460	0.02		48.81	48.72	48.89	4.23662e+09	2.84	1.04634e+09	2.89		47.16	47.08	47.23	2.53126e+09	3.82	8.38622e+08	4.79
46.12	46.11	46.13	129124	0	198193	0.02		48.91	48.9	48.92	1.31675e+06	0	1.89298e+06	0.01		47.29	47.23	47.38	1.00293e+09	1.51	2.98239e+08	1.7
46.18	46.14	46.25	3.76879e+06	0.1	1.15715e+06	0.1		48.97	48.96	48.98	535443	0	610298	0		47.4	47.39	47.41	133105	0	308899	0
46.26	46.25	46.27	169184	0	277104	0.02		49.09	49.02	49.2	1.32947e+08	0.09	2.77224e+07	0.08		47.43	47.42	47.44	209868	0	399561	0
46.28	46.27	46.29	170668	0	295114	0.03		49.22	49.2	49.23	244163	0	294870	0		47.44	47.44	47.45	179807	0	352257	0
46.3	46.29	46.32	293630	0.01	264458	0.02		49.33	49.25	49.43	1.35679e+08	0.09	3.46048e+07	0.1		47.47	47.45	47.47	137202	0	207493	0
46.39	46.32	46.45	1.13819e+07	0.29	3.19914e+06	0.28		49.44	49.44	49.46	137992	0	218617	0		47.59	47.5	47.67	3.19045e+09	4.81	7.42457e+08	4.24
46.46	46.45	46.47	112282	0	114683	0.01		49.55	49.47	49.61	2.31264e+08	0.16	5.4268e+07	0.15		47.71	47.7	47.72	467690	0	924660	0.01
46.55	46.48	46.62	7.82907e+07	2	2.29069e+07	2.03		49.68	49.61	49.77	2.62881e+08	0.18	5.51945e+07	0.15		47.73	47.73	47.75	160725	0	273292	0
46.67	46.62	46.78	3.43249e+07	0.88	7.1537e+06	0.63		49.8	49.79	49.82	181800	0	216020	0		47.77	47.76	47.77	147125	0	217134	0
46.85	46.8	46.88	2.2339e+07	0.57	6.62679e+06	0.59		49.83	49.82	49.84	92724.4	0	161440	0		47.83	47.78	47.95	2.06895e+08	0.31	3.93494e+07	0.22
46.94	46.88	47.04	6.22811e+07	1.59	1.48367e+07	1.32		49.85	49.84	49.86	159565	0	230565	0		48.02	47.96	48.05	2.88576e+08	0.44	9.24815e+07	0.53
47.04	47.04	47.05	85991.3	0	220179	0.02		49.93	49.86	50.02	2.11182e+07	0.01	3.57187e+06	0.01		48.09	48.05	48.11	1.94733e+08	0.29	6.32839e+07	0.36
47.07	47.06	47.07	83791.5	0	167619	0.01		50.04	50.02	50.13	1.10155e+07	0.01	2.54691e+06	0.01		48.15	48.11	48.25	3.20896e+08	0.48	8.27382e+07	0.47
47.14	47.08	47.22	8.09289e+07	2.07	2.29153e+07	2.03		50.14	50.13	50.15	103637	0	232249	0		48.26	48.26	48.27	136402	0	241600	0
47.27	47.22	47.38	3.89363e+07	1	9.14096e+06	0.81		50.16	50.16	50.17	71117.9	0	161433	0		48.31	48.3	48.32	356281	0	498558	0
47.41	47.39	47.42	519188	0.01	475424	0.04		50.3	50.21	50.39	8.11764e+08	0.54	2.09693e+08	0.58		48.34	48.32	48.35	424280	0	596151	0
47.43	47.42	47.45	426199	0.01	423139	0.04		50.4	50.39	50.41	206985	0	384864	0		48.47	48.37	48.57	1.08067e+08	0.16	2.43235e+07	0.14
47.47	47.46	47.48	100426	0	163829	0.01		50.52	50.44	50.6	1.55315e+07	0.01	4.05256e+06	0.01		48.59	48.57	48.64	1.35988e+06	0	717069	0
47.56	47.48	47.65	9.2363e+07	2.36	2.02335e+07	1.79										48.78	48.7	48.87	1.55485e+09	2.35	4.07471e+08	2.33
47.67	47.67	47.69	285044	0.01	403646	0.04										48.91	48.91	48.93	381295	0	615671	0
47.71	47.7	47.72	532013	0.01	567916	0.05										48.95	48.94	48.96	91094.3	0	143996	0
47.75	47.73	47.76	409792	0.01	409737	0.04										48.97	48.96	48.98	121463	0	246495	0
47.77	47.76	47.78	280454	0.01	416406	0.04										49.07	48.99	49.17	3.90889e+07	0.06	7.94971e+06	0.05
47.83	47.79	47.85	3.55548e+06	0.09	1.40057e+06	0.12										49.21	49.17	49.25	2.07676e+06	0	864912	0
47.88	47.85	47.94	4.09094e+06	0.1	1.46182e+06	0.13										49.31	49.25	49.41	3.38827e+07	0.05	8.40645e+06	0.05
48	47.94	48.1	1.68977e+07	0.43	3.16703e+06	0.28										49.41	49.41	49.43	254274	0	366760	0
48.15	48.1	48.26	1.37727e+07	0.35	2.66442e+06	0.24										49.54	49.45	49.6	8.90537e+07	0.13	1.89561e+07	0.11
48.31	48.26	48.33	602431	0.02	267906	0.02										49.67	49.6	49.78	1.2396e+08	0.19	2.49725e+07	0.14
48.34	48.33	48.35	164395	0	237772	0.02										49.79	49.78	49.81	314927	0	322265	0
48.38	48.37	48.38	94599.2	0	161742	0.01										49.82	49.81	49.83	139549	0	250501	0
48.47	48.38	48.61	1.02683e+07	0.26	1.96107e+06	0.17										49.84	49.83	49.85	89661.3	0	144975	0
48.66	48.61	48.67	640683	0.02	347513	0.03										49.94	49.85	49.99	1.07946e+07	0.02	2.09217e+06	0.01
48.76	48.69	48.88	5.23091e+07	1.34	1.11001e+07	0.98										50.01	49.99	50.11	8.15869e+06	0.01	1.63922e+06	0.01
48.89	48.88	48.9	279059	0.01	351293	0.03										50.12	50.11	50.13	128365	0	164124	0
48.93	48.9	48.97	824677	0.02	352153	0.03										50.16	50.13	50.17	568484	0	420260	0
48.98	48.97	48.99	145107	0	252053	0.02										50.27	50.2	50.38	3.2029e+08	0.48	8.08328e+07	0.46
49.04	48.99	49.07	1.75158e+06	0.04	622825	0.06										50.41	50.41	50.42	58277.4	0	121847	0
49.13	49.07	49.23	4.77365e+06	0.12	891945	0.08										50.43	50.43	50.44	51427.7	0	102841	0
49.32	49.24	49.41	2.56778e+06	0.07	483187	0.04										50.51	50.44	50.57	4.72426e+06	0.01	1.23977e+06	0.01
49.43	49.41	49.44	101433	0	115531	0.01										50.58	50.57	50.61	177457	0	198631	0
49.47	49.45	49.47	98026.1	0	170597	0.02
49.52	49.49	49.59	3.06561e+06	0.08	644668	0.06
49.68	49.59	49.79	5.30694e+06	0.14	948983	0.08
49.8	49.79	49.81	107286	0	199467	0.02
49.83	49.81	49.84	261052	0.01	236370	0.02
49.95	49.85	50.05	7.33772e+06	0.19	1.14046e+06	0.1
50.08	50.05	50.12	1.07991e+06	0.03	331947	0.03
50.15	50.12	50.18	730197	0.02	356065	0.03
50.2	50.19	50.2	75836.4	0	167651	0.01
50.29	50.2	50.4	1.16807e+07	0.3	2.20282e+06	0.2
50.41	50.4	50.42	171635	0	259783	0.02
50.45	50.42	50.46	596551	0.02	351754	0.03
50.49	50.46	50.54	971845	0.02	358290	0.03
50.56	50.54	50.57	478449	0.01	324573	0.03
