# Supplementary material for: Oral transfer of chemical cues, growth proteins and hormones in social insects
Source: eLife. 2016 Nov 29;5:e20375. doi: 10.7554/eLife.20375 (PMC5153251; doi:10.7554/eLife.20375)
Supplement: Figure 3—source data 2. [file elife-20375-fig3-data2.xlsx]

## Sheet: Sheet1
	tf10	tf13	tf21	tf34	tf52	b10	b13	b21	b34	b52
tf10	1	0.884522	0.929975	0.786844	0.828652	0.632965	0.749598	0.913077	0.810589	0.617726
tf13	0.884522	1	0.969065	0.828058	0.836826	0.524749	0.761063	0.818715	0.700888	0.607712
tf21	0.929975	0.969065	1	0.810189	0.828727	0.542056	0.749045	0.89441	0.757221	0.606478
tf34	0.786844	0.828058	0.810189	1	0.952837	0.429964	0.610865	0.684016	0.606182	0.447647
tf52	0.828652	0.836826	0.828727	0.952837	1	0.419496	0.637215	0.696215	0.604664	0.46748
b10	0.632965	0.524749	0.542056	0.429964	0.419496	1	0.527085	0.633639	0.737292	0.555959
b13	0.749598	0.761063	0.749045	0.610865	0.637215	0.527085	1	0.707824	0.728029	0.778827
b21	0.913077	0.818715	0.89441	0.684016	0.696215	0.633639	0.707824	1	0.897407	0.618162
b34	0.810589	0.700888	0.757221	0.606182	0.604664	0.737292	0.728029	0.897407	1	0.67474
b52	0.617726	0.607712	0.606478	0.447647	0.46748	0.555959	0.778827	0.618162	0.67474	1
