# Supplementary material for: Oral transfer of chemical cues, growth proteins and hormones in social insects
Source: eLife. 2016 Nov 29;5:e20375. doi: 10.7554/eLife.20375 (PMC5153251; doi:10.7554/eLife.20375)
Supplement: Figure 5—source data 1. — A complete orthology across the four species can be found in Supplementary file 3. [file elife-20375-fig5-data1.xlsx]

## Sheet: Orthology TF
Protein - as in manuscript	Additional Name Information	Putative Function	Dmel Ortholog	Secretion Signal				UNIPROT Camponotus floridanus	NCBI Camponotus floridanus	IDs Apis mellifera
				Dmel	Cflo	Sinv	Amel				IDs Solenosis invicta	IDs Camponotus fellah	Trophallactic Fluid NSAF Camponotus floridanus	Trophallactic Fluid NSAF Camponotus fellah	Trophallactic Fluid NSAF Solenopsis invicta	Trophallactic Fluid NSAF Apis mellifera	Dmel GO cellular component
JHE/Est-6 1	Esterase FE4	JH regulation	CG6414	1	1			E2AJL8	XP_011259280.1			GFBD01021653	0.108985	0.0488173			cell surface [GO:0009986]; integral component of plasma membrane [GO:0005887]; synapse [GO:0045202]
GMC Glucose dehydrogenase 1	Glucose dehydrogenase	Sugar Metabolism	Gld	0	0	0	0	E2AC27	XP_011255282.1	A0A088A031 / NP_001011574.1	XP_011170785.1 / E9IBI7	GFBD01026497	0.0925076	0.070404	0.0287822	0.0302058	extracellular region [GO:0005576]
Cathepsin D 2	Lysosomal aspartic protease	Defense; Apoptosis	cathD	1	0			E2AZ61	XP_011266632.1			GFBD01057497	0.0799182	0.0333076			extracellular region [GO:0005576]; extracellular space [GO:0005615]; lysosome [GO:0005764]; microtubule associated complex [GO:0005875]
SMP30/Regucalcin 1	Regucalcin	Ca2+ binding; Growth	smp-30/Regucalcin	0	0	0	0	E2AGQ0	XP_011257802.1	A0A087ZSJ2	E9IDS8 / XP_011175815.1	GFBD01036263	0.0712737	0.0695592	0.0225438		extracellular region [GO:0005576]; extracellular space [GO:0005615]; lipid particle [GO:0005811]
CREG1 1	CREG1	Growth	CREG	1	1	1	1	E2A6T2	XP_011252500.1	A0A088AKM4	E9ILZ0 / XP_011159642.1	GFBD01051573	0.07041	0.0191497	0.000695935		n/a
Ant specific	Uncharacterized protein	Unknown	n/a	n/a	1	1		E2AY28	XP_011266069.1		XP_011156091.1		0.069698		0.0393754		n/a
Sugar Processing MAL 1	Maltase 1	Sugar Metabolism	Mal-B1	1	1	1	1	E2B003	XP_011267047.1	Q25BT8	E9IJ02 / XP_011157503.1	GFBD01064586	0.0620901	0.0850927	0.0623208		n/a
Cathepsin D 1	Lysosomal aspartic protease	Defense; Apoptosis	cathD	1	1	0	1	E2AZ59	XP_011266628.1	A0A087ZY53	E9IL23 / XP_011158971.1	GFBD01024031	0.0520867	0.0306214	0.0754888		extracellular region [GO:0005576]; extracellular space [GO:0005615]; lysosome [GO:0005764]; microtubule associated complex [GO:0005875]
Chromatin-assembly factor	Chromatin assembly factor 1 subunit FAS2	Chromatin	Caf1-105	0	0	0	1	E2A631	XP_011252211.1	A0A088AN65	E9IUX5 / XP_011163668.1	GFBD01032353	0.0503208	0.018165	0.0117254		nucleus [GO:0005634]; CAF-1 complex [GO:0033186]
Serine Protease 1-v	Vitellogenic carboxypeptidase	Proteolysis; RNA transport	CG4572	1	1	1	1	E2AY02	XP_011266010.1	A0A087ZN44 / C9WMM5	E9IJU5 / XP_011158000.1	GFBD01064617	0.0480104	0.016371	0.00122712	0.000268991	n/a
Cathepsin D 4	Lysosomal aspartic protease	Defense; Apoptosis	cathD	1	1			E2AZ60	XP_011266630.1				0.0359177	0.00859942			extracellular region [GO:0005576]; extracellular space [GO:0005615]; lysosome [GO:0005764]; microtubule associated complex [GO:0005875]
DNase	Deoxyribonuclease-2-alpha	Unknown	Q9VED8	1	1	1	1	E2A8P0	XP_011253495.1	A0A088A5G0	XP_011163299.1	GFBD01042106	0.0331111	0.0103982	0.00769902		intracellular [GO:0005622]
JHE/Est-6 2	Esterase FE4	JH regulation	CG6414	1	0	0		E2AJM0	XP_011259278.1		XP_011158276.1	GFBD01014995	0.0328693	0.110282			cell surface [GO:0009986]; integral component of plasma membrane [GO:0005887]; synapse [GO:0045202]
Serpin 1	Serine protease inhibitor 3/4	Regulation of Proteolysis	Spn42Da	1	0	0	0	E2ALG2	XP_011260361.1	A0A088ABM1 / XP_016772722.1	E9I8G3 / XP_011175238.1	GFBD01037481	0.0231256	0.0176301	0.00204361	0.000161458	extracellular space [GO:0005615]
Npc2 1	Protein NPC2-like protein	Sterol- and Lipid-binding/transport	Npc2a	1	0			E2ATD2	XP_011263680.1			GFBD01066367	0.0119914	0.0188937			extracellular space [GO:0005615]
Sugar Processing MAL 2	Maltase 1	Sugar Metabolism	Mal-B1	1	1	1	1	E2AIX5/E2A8S6	XP_011258883.1	Q25BT8	E9IJ02 / XP_006560869.1	GFBD01064587	0.0109002	0.0093136	0.0623208		n/a
Glucosylceramidase 2	Glucosylceramidase	Metabolism	Gba1b	1	1	1	1		XP_011267131.1	A0A088APM5 / XP_006570610.1	XP_011166831.1	GFBD01028196	0.01006			0.00480207	cell [GO:0005623]
Phosphatase 1	Lysosomal acid phosphatase	Phagocytosis	CG9449	1	0	0		E2AZX4	XP_011267011.1		E9ISK7 / XP_011162430.1		0.00991007				extracellular exosome [GO:0070062]; integral component of membrane [GO:0016021]; nucleus [GO:0005634]
Glucosylceramidase 1	Glucosylceramidase	Metabolism	Gba1b	1	1	1	1	E1ZYU8	XP_011267131.1	A0A088APM4	XP_011166830.1	GFBD01028195	0.00908519	0.00231561	0.00273647	0.00848349	cell [GO:0005623]
Porin	Voltage-dependent anion-selective channel	Channel (lipid-particle associated(	porin	0	0	0	0	E2ARX6	XP_011262974.1	A0A088ACZ3	E9IT23 / XP_011162712.1	GFBD01009065	0.00688354	0.000446135	0.00240919		lipid particle [GO:0005811]; microtubule associated complex [GO:0005875]; mitochondrial outer membrane [GO:0005741]; mitochondrion [GO:0005739]; Nebenkern [GO:0016006]; pore complex [GO:0046930]
Phospholipase A2	Phospholipase A2	Lipid metabolism	CG30503	1	1	1		E2ARH9	XP_011262712.1		E9J9T2 / XP_011171476.1		0.00673558		0.000911846		extracellular region [GO:0005576]
Sugar Processing Trehalase	Trehalase	Sugar Metabolism	Treh	1	1	1	1	E2A4X8	XP_011251688.1	A0A087ZXG0 / XP_393963.3	XP_011170317.1 / E9J7N1	GFBD01012552	0.00667521	0.0103138	0.0125749		n/a
JHE/Est-6 3	Esterase FE4	JH regulation	CG6414	1	1			E2AI90	XP_011258534.1				0.0064099	0.00431911			cell surface [GO:0009986]; integral component of plasma membrane [GO:0005887]; synapse [GO:0045202]
Hexosaminidase 1	Beta-hexosaminidase	Metabolism	Hexo1	1	1	1	1	E2AC60	XP_011255300.1	A0A087ZVE1	E9JAB2 / XP_011171734.1	GFBD01012137	0.0048168	0.000486266	0.00766945		plasma membrane [GO:0005886]
FAM151B	Protein FAM151A	Unknown	CG7231	1	1	1	1	E2B0D3	XP_011267179.1	A0A088AN34	E9IYM2 / XP_011165604.1	GFBD01022321	0.00471936	0.00347157			n/a
GMC Glucose dehydrogenase 2	Glucose dehydrogenase	Sugar Metabolism	Gld	0	0	0	0	E2AC28	XP_011255281.1	A0A088A030 / XP_623443.2	XP_011170774.1	GFBD01066116	0.00469374	0.00866115	0.0213325	0.00467401	extracellular region [GO:0005576]
Hexosaminidase 2	Beta-hexosaminidase	Metabolism	Hexo1	1	1	1	1	E2ARG4	XP_011262697.1	A0A087ZUU5 / XP_006561863.1	E9J970 / XP_011171063.1	GFBD01012731	0.00462791		0.000802712	0.000174306	plasma membrane [GO:0005886]
Tetraspanin	23 kDa integral membrane protein	Unknown/Membrane	Tsp42Ea	0	0	0	0	E2B227	XP_011267964.1	A0A087ZPN3 / NP_001011592.1	XP_011171449.1	GFBD01009639	0.00434864	0.0045316			integral component of membrane [GO:0016021]
Unknown 2	Putative uncharacterized protein	Unknown	n/a	n/a	1			E2APG1	XP_011261706.1			GFBD01036863	0.00432927	0.00842134			n/a
Sugar Processing MAL 5	Maltase 1	Sugar Metabolism	Mal-B1	1	0			E2ASA4	XP_011263134.1			GFBD01064584	0.00375246	0.0114708			n/a
Apolipophorins	Apolipophorins	Growth; Lipid transport/storage	RfaBp	1	1	1	1	E2A7K7	XP_011252932.1	A0A088AS56 / XP_016768851.1	XP_011166991.1 / E9J0Z7	GFBD01029234	0.00371393	0.000815578	0.0492198	0.00460829	basal part of cell [GO:0045178]; endocytic vesicle [GO:0030139]; extracellular region [GO:0005576]; extracellular space [GO:0005615]; lipid particle [GO:0005811]; microtubule associated complex [GO:0005875]
JHE/Est-6 4	Esterase FE4	JH regulation	CG6414	1	1			E2ANU0	XP_011261403.1				0.00328846				cell surface [GO:0009986]; integral component of plasma membrane [GO:0005887]; synapse [GO:0045202]
Serine Protease 3	Mite allergen Der f 3	Proteolysis	CG8299	1	1	0	1	E2A5W9	XP_011252134.1	A0A088AKU3	XP_011164057.1	GFBD01065990	0.0031008	0.0140295	0.00807267		cytoplasm [GO:0005737]
Phospholipase B1	Phospholipase B1, membrane-associated	Lipid metabolism	CG11029	1	1	1	1	E2AGG0	XP_011257663.1	A0A087ZUF5	E9IQ09 / XP_011161176.1	GFBD01042657	0.00308483	0.0164188			n/a
Actin5c	Actin related protein	Structure	Actin5c	0	0	0	0	E2AFQ5	XP_011257342.1	A0A087ZZF3 / NP_001172074.1	E9I8G6 / XP_011173672.1		0.00290207			0.00132546	cytoplasm [GO:0005737];lipid particle [GO:0005811]; cytoskeleton [GO:0005856]; microtubule associated complex [GO:0005875]; actin filament [GO:0005884]; Ino80 complex [GO:0031011]; brahma complex [GO:0035060];
Sugar Processing AMY 3	Alpha-amylase	Sugar Metabolism	Amy-p	1	1			E2AS67	XP_016770320.1				0.00278983				extracellular region [GO:0005576]
Aminopeptidase	Aminopeptidase N	Metabolism	CG14516	0	1	1	1	E2ALS8	XP_011260516.1	A0A087ZUB3	XP_011172939.1 / E9JC19	GFBD01042421	0.00277168	0.00487143	0.00223994		cytoplasm [GO:0005737]; integral component of membrane [GO:0016021]; plasma membrane [GO:0005886]
Cathepsin L	Cathepsin L	Proteolysis	CG8947	1	1	1		E2AE51	XP_011256478.1		E9J0U7 / XP_011166850.1	GFBD01044064	0.00272701	0.00315032	0.000713407		extracellular space [GO:0005615]; lipid particle [GO:0005811]; lysosome [GO:0005764]; microtubule associated complex [GO:0005875]
Hexamerin 1	Arylphorin subunit alpha	Growth; Nutrient storage/transport	Lsp2	1	1	1	1	E1ZXZ5	XP_011263006.1	A0A088AJI5 / NP_001104234.1	E9IF51 / XP_011155484.1		0.00265705		0.0224809	0.00266426	larval serum protein complex [GO:0005616]; lipid particle [GO:0005811]
Phosphatase 4	venom acid phosphatase Acph-1-like	Unknown	CG9451	1	1				XP_011251615.1				0.00263488				extracellular exosome [GO:0070062]; nucleus [GO:0005634]
Vacuolar H+ ATPase	Vacuolar ATP synthase catalytic subunit A	ATP Metabolism	Vha68-2	0	0	0	0	E2A6I4	XP_011252356.1	A0A088ANZ0 / XP_623495.1	E9IUV8 / XP_011163633.1	GFBD01012351	0.00240492	0.00151935		0.000110574	plasma membrane [GO:0005886]; plasma membrane proton-transporting V-type ATPase complex [GO:0033181]; vacuolar proton-transporting V-type ATPase, V1 domain [GO:0000221]
Hexamerin 3	Pseudohemocyanin-1/ Hexamerin 110	Growth; Nutrient storage/transport	Lsp2	1	1	1	1	E2AW15	XP_011265096.1	XP_006566318.1 / A0A088A1A1 / NP_001094493.1	E9JAJ6 / XP_011171862.1		0.00223882		0.00363824	4.49525e-05	larval serum protein complex [GO:0005616]; lipid particle [GO:0005811]
Guanine deaminase	Guanine deaminase	Metabolism	DhpD	0	0	0	0	E2APK5	XP_011261771.1	A0A087ZWZ2	E9IJI7 / XP_011157822.1	GFBD01065706	0.00217852				n/a
Glycoside hydrolase	Uncharacterized family 31 glucosidase KIAA1161-like	Metabolism	Tobi	1	1	1			XP_011266472.1		XP_011157772.1	GFBD01063298	0.00201935		0.0014691		n/a
Carboxypeptidase 2	Carboxypeptidase Q-like	Proteolysis	n/a	n/a	1	1	1	E2ALP2	XP_011260424.1	A0A088AJR6 / XP_393632.2	XP_011167765.1	GFBD01008517	0.00183703	0.00622957	0.00127743	0.00336456	n/a
Arginine kinase	Arginine kinase	Biosynthesis	Argk	0	0	0	0	E2ATE8	XP_011263666.1	A0A088ARZ8	E9ILH3 / XP_011159208.1	GFBD01065986	0.00171531	0.000378308	0.0060633		cytoplasm [GO:0005737]; cytosol [GO:0005829]; extracellular region [GO:0005576]; plasma membrane [GO:0005886]
Allantoinase	Allantoinase, mitochondrial	Metabolism	CG6106	0	0	0		E2AKK9	XP_011259872.1		XP_011159795.1	GFBD01008510	0.00153801				n/a
Carboxypeptidase 1	Zinc carboxypeptidase-like	Proteolysis; Neurogenesis	CG17633	1	1	1	1	E1ZXR7	XP_011262056.1	A0A088A4S2 / XP_623922.2	XP_011160937.1 / E9IPL1	GFBD01066121	0.000931344	0.00217998	0.0245525		extracellular space [GO:0005615]
JHE/Est-6 5	Carboxylic ester hydrolase	JH regulation	CG6414	1	1			E2AJL9	XP_011259279.1			Present but not annotated well	0.000898879	0.00805059			cell surface [GO:0009986]; integral component of plasma membrane [GO:0005887]; synapse [GO:0045202]
MRJP/yellow 12	Yellow	Growth; Nutrient storage/transport	n/a	n/a	1	1	1	E2AXN0	XP_011265873.1	XP_006559006.1 / A0A088AU16	XP_011164453.1 / E9IAC5	Present but not annotated well	0.000873617	0.000895972			n/a
Sugar Processing MAL 3	Maltase 1 like	Sugar Metabolism	Mal-B1	1	1				XP_011258887.1			GFBD01064590	0.000860018	0.0143805			n/a
Stomatin	Band 7 protein / erlin	Unknown/Membrane	CG42540	0	0	0	0	E2A6U3	XP_011252508.1	XP_006565712.1 / A0A087ZS70	XP_011160873.1 / E9IPG1	GFBD01030943	0.000664864	0.00617056			integral component of membrane [GO:0016021]
Imaginal disc growth factor 4	Chitinase LOC724987 idg4	Growth; Metabolism	Idgf4	1	1	1	1	E2AJT8	XP_011259390.1	A0A088AMK2 / XP_001120887.3	E9IDV6 / XP_011175868.1	GFBD01008807	0.000444329		0.0125412	0.00272105	extracellular region [GO:0005576]
Glutathione peroxidase	Glutathione peroxidase	Oxidative stress	PHGPx	0	1	1	1	E2A4H5	XP_011251451.1	A0A088AB47 / XP_006564802.1	E9I832 / XP_011156834.1		0.000414158		0.00669692	0.000547344	endomembrane system [GO:0012505]; Golgi apparatus [GO:0005794]
Hexamerin 2	Hexamerin-like	Growth; Nutrient storage/transport	Lsp2	1	1	1	1	E1ZXZ4		Q6J4Q1 / NP_001011600.1	XP_011155508.1 / E9IF52		0.000342394		0.0103533	0.000184089	larval serum protein complex [GO:0005616]; lipid particle [GO:0005811]
JHE/Est-6 6	Carboxylic ester hydrolase	JH regulation	CG6414	1	1	1	1	E2A4N5	XP_011251529.1	Q76LA5 / XP_006563937.1	E9IIB7 / XP_011157167.1	Present but not annotated well	7.86672e-05	0.00504001			cell surface [GO:0009986]; integral component of plasma membrane [GO:0005887]; synapse [GO:0045202]
Chitinase	Chitinase-3-like protein 1	Metabolism	Cht8	1	1	1	1	E2A5G4	XP_011251922.1	A0A087ZUC1 / XP_003250667.1	XP_011172552.1 / E9JBG4	GFBD01066040	7.49091e-05		0.0105399		extracellular region [GO:0005576]
Sugar Processing AMY 1	Alpha-amylase	Sugar Metabolism	Amyrel	1	1	1	1	E2AS66	XP_011263078.1	A0A088AEG8 / NP_001011598.1	E9ITJ4 / XP_011162987.1	GFBD01014512	3.144e-05	0.0413071	0.0249208	0.0188853	extracellular region [GO:0005576]
Adenosine deaminase growth factor	Adenosine deaminase CECR1-like	Growth	Adgf-A	1	1	1	1	E2A040	XP_011268640.1	A0A088AQC8 / XP_006562812.1	E9J2X5 / XP_011167998.1	GFBD01036117			0.00439883		extracellular space [GO:0005615]
Aldehyde oxidase	Xanthine dehydrogenase	Metabolism	AOX3	0	0	0	0	E2ANE4	XP_011261213.1	A0A087ZYD0 / XM_016913397.1	XP_011165884.1	GFBD01023163			0.000395762	0.00134544	cytosol [GO:0005829]
Carboxyesterase	Carboxylic ester hydrolase	Metabolism	CG10175	1			1			A0A088A5D7						0.0235539	cell surface [GO:0009986]; integral component of plasma membrane [GO:0005887]; synapse [GO:0045202]
Cathepsin D 3	Lysosomal aspartic protease	Defense; Apoptosis	n/a	n/a								GFBD01057495		0.0517648			n/a
Cathepsin D 5	LAP - Cathepsin D	Defense; Apoptosis	cathD	1	0			E2AR30	XP_011262509.1			GFBD01057482		0.0394359			extracellular region [GO:0005576]; extracellular space [GO:0005615]; lysosome [GO:0005764]; microtubule associated complex [GO:0005875]
Cathepsin D 6	LAP-Cathepsin D	Defense; Apoptosis	cathD	1	0			E1ZVF8	XP_011262847.1			GFBD01057484		0.0113014			extracellular region [GO:0005576]; extracellular space [GO:0005615]; lysosome [GO:0005764]; microtubule associated complex [GO:0005875]
Cathepsin D 7	LAP Fragment	Defense; Apoptosis	cathD	1	0			E2AA63				GFBD01057492		0.00539849			extracellular region [GO:0005576]; extracellular space [GO:0005615]; lysosome [GO:0005764]; microtubule associated complex [GO:0005875]
CREG1 2	CREG1	Growth	CREG	1								GFBD01037197		0.0693528			n/a
CRISP 1	Venom allergen 3	Unknown	CG8483	1	0	1	1	E2ABL4		A0A087ZSR7	E9IAI6 / XP_011165207.1	GFBD01015743			0.0368399		extracellular region [GO:0005576]
CRISP 2	Venom allergen 3-like	Unknown	CG8483	1		1					XP_011165202.1				0.00797685		extracellular region [GO:0005576]
CRISP 3	Phospholipase A1 /venom allergen 3	Unknown	CG8483	1	0	0		E2ABL5			E9IAI3 / XP_011173760.1				0.005771		extracellular region [GO:0005576]
DNA-ligase	Cingulin-like	Unknown	n/a	n/a	1	1		E2AAH6	XP_011254474.1		XP_011165402.1	GFBD01009115			0.0118096		n/a
Esterase B1	Esterase B1-like	Unknown	CG10175	1		1	1			XP_016770320.1	XP_011171836.1					0.0107092	cell surface [GO:0009986]; integral component of plasma membrane [GO:0005887]; synapse [GO:0045202]
Ferritin	Ferritin subunit	Iron storage/transport	Fer1HCH	1	1	1		E2AZU0	XP_011266939.1		XP_011160667.1 / E9IP36	GFBD01008841			0.010848		extracellular region [GO:0005576]; fusome [GO:0045169]; Golgi apparatus [GO:0005794]; intracellular ferritin complex [GO:0008043]; microtubule associated complex [GO:0005875]
GAPDH	Glyceraldehyde-3-phosphate dehydrogenase 2	Metabolism	Gadph-1	0	0	0	0		XP_011255085.1	XP_393605.1	XP_011160545.1	GFBD01009020			0.00434821	0.000485018	lipid particle [GO:0005811]; M band [GO:0031430]; Z disc [GO:0030018]
Glucosylceramidase 3	Glucosylceramidase-like	Metabolism	Gba1b	1	1	0			XP_011252431.1		XP_011158240.1 / E9IK44	GFBD01025734		0.00543922	0.000181115		cell [GO:0005623]
Glutathione S-transferase	Glutathione S-transferase	Metabolism/oxidative stress	GstD4	0	0	0	0	E2AMG4	XP_011260793.1	A0A088AFL5 / XP_006563394.1	E9J624 / XP_011175842.1	GFBD01014438			0.00515725		cytoplasm [GO:0005737]
GMC Glucose dehydrogenase 3	Glucose dehydrogenase-like	Sugar Metabolism	Gld	0			0			XP_001123076.2 / A0A088AIU4						0.0225344	extracellular region [GO:0005576]
GMC Glucose dehydrogenase 4	Glucose dehydrogenase	Sugar Metabolism	Gld	0			0			A0A087ZVX4 / XP_394210.4						0.000747896	extracellular region [GO:0005576]
GMC oxidoreductase 1	Glucose dehydrogenase	Metabolism	RE11240p	0	0	0	0	E2ACY0	XP_011255768.1	A0A087ZVX2 / XP_394209.2	E9IHX9 / XP_011156959.1	GFBD01066124				0.0131199	integral component of membrane [GO:0016021]
GMC oxidoreductase 2	Glucose dehydrogenase	Ecdysteroid metabolism	CG9514	0			1			XP_392145.2 / A0A087ZVX3						0.000679134	integral component of membrane [GO:0016021]
Histone 2A	Histone H2A	Chromatin	His2A	0	0	0	0	E2AUU1	XP_011268841.1	A0A088A826 / XP_001120186.1	E9IU71 / XP_011163198.1	GFBD01003536			0.00695864		chromosome [GO:0005694]; lipid particle [GO:0005811]; nuclear chromatin [GO:0000790]; nuclear nucleosome [GO:0000788]; nucleosome [GO:0000786]; nucleus [GO:0005634]; polytene chromosome [GO:0005700]; polytene chromosome band [GO:0005704]
Histone 2B	Histone H2B	Chromatin	His2B:CG17949	0	0	0	0	E2A0I7	XP_011268843.1	A0A088A824 / XP_003251626.1	XP_011166349.1 / E9IGQ6	GFBD01026779			0.0079143		lipid particle [GO:0005811]; nuclear nucleosome [GO:0000788]; nucleosome [GO:0000786]
Histone4	Histone H4	Chromatin	His4:CG33869	0	0	0	0	E2A0J1	XP_011265836.1	P91849 / XP_006570863.1	XP_011156268.1 / E9IU67	GFBD01068271			0.0174626		chromosome [GO:0005694]; lipid particle [GO:0005811]; nuclear chromosome [GO:0000228]; nucleosome [GO:0000786]; RCAF complex [GO:0035059]
Icarapin	Icarapin-like	Unknown	n/a	n/a		1	1			ICA / Q5BLY4 / NP_001012431.1	XP_011166768.1				0.00241404	0.00093278	n/a
Inositol polyphosphate phosphatase 4	Inositol polyphosphate 1-phosphatase-like	Multiple	Ipp	0			1			XP_016770797.1						0.00975188	cytoplasm [GO:0005737]
JHBP	Hemolymph JHBP LOC105202373	Growth; JH storage/transport	CG7916	1		1	1			XP_006570404.1	XP_011169150.1				0.0583026		n/a
Laccase2	Laccase-1	Cuticle development	Laccase2	0			1			A0A087ZR10 / XP_625189.2						0.00212069	n/a
Lectin	Beta-1,3-glucan-binding protein-like	Carbohydrate binding/metabolism	GNBP3	1	1	1	1	E2AVH4	XP_011264688.1	A0A087ZV12 / NP_001157186.1	XP_011166243.1 / E9IZR6				0.00772918	9.86414e-05	cell surface [GO:0009986]; extracellular region [GO:0005576]
Lipase 1	Lipase	Lipid Metabolism	CG17292	0	1	0	1	E2AIM4	XP_011258702.1	A0A087ZXA0	E9IDK8 / XP_011175763.1	GFBD01036924				0.0168116	cytosol [GO:0005829]; extracellular region [GO:0005576]
Lipase 2	Lipase 3-like	Metabolism; Growth	CG31871	0	1	1	1	E2A1A9	XP_011269284.1	A0A087ZSH4	E9IG14 / XP_011155926.1	GFBD01028426			0.0113311		n/a
Lipase 3	Pancreatic triacylglycerol lipase-like	Lipid Metabolism	CG17292	0			1			A0A087ZXA2 / XP_623663.1						0.00265227	cytosol [GO:0005829]; extracellular region [GO:0005576]
Metal protease	Dipeptidase	Metal binding/Metabolism	CG6154	0	1	0	0	E1ZYQ1	XP_011266637.1	A0A087ZQA2 / XP_006562821.2	E9J0Q9 / XP_011166791.1	GFBD01022489			0.00594002	0.000300813	anchored component of membrane [GO:0031225]
MRJP/yellow 1	Major royal jelly protein 1	Growth; Nutrient storage/transport	n/a	n/a			1			MRJP1 / O18330 / NP_001011579.1						0.317047	n/a
MRJP/yellow 10	Uncharacterized protein	Growth; Nutrient storage/transport	n/a	n/a		1	1			A0A088AU27 / NP_001014429.1	XP_011158891.1					0.0415606	n/a
MRJP/yellow 11	protein yellow-like isoform X1 y-e3	Growth; Nutrient storage/transport	n/a	n/a	0	0	1	E2AXM8	XP_011265872.1	A0A088AU18 / NP_001091698.1	XP_011164475.1 / E9IAC7	GFBD01025637		0.00365399	0.00879912		n/a
MRJP/yellow 2a	Major royal jelly protein 2	Growth; Nutrient storage/transport	n/a	n/a			1			MRJP2 / O77061 / NP_001011580.1						0.00200311	n/a
MRJP/yellow 2b	MRJP2-like	Growth; Nutrient storage/transport	n/a	n/a			1			A0A088AU26 / XP_016770162.1						0.00090596	n/a
MRJP/yellow 3a	Major royal jelly protein 3 precursor	Growth; Nutrient storage/transport	n/a	n/a			1			Q17060 / NP_001011601.1						0.0604006	n/a
MRJP/yellow 3b	MRJP3-like	Growth; Nutrient storage/transport	n/a	n/a			0			A0A088A3F4 / XP_016773212.1						0.00422572	n/a
MRJP/yellow 4a	MRJP4	Growth; Nutrient storage/transport	n/a	n/a			1			A0A088AU20						0.00299531	n/a
MRJP/yellow 4b	Major royal jelly protein 4	Growth; Nutrient storage/transport	n/a	n/a			1			MRJP4 / Q17061 / NP_001011610.1						0.00754239	n/a
MRJP/yellow 5	Major royal jelly protein 5	Growth; Nutrient storage/transport	n/a	n/a			1			MRJP5 / NP_001011599.1 / A0A088AU22						0.0140781	n/a
MRJP/yellow 6	MRJP6	Growth; Nutrient storage/transport	n/a	n/a		1	1			A0A088AU21 / NP_001011622.1	751211253				0.00879313	0.0202101	n/a
MRJP/yellow 7	Major royal jelly protein	Growth; Nutrient storage/transport	n/a	n/a			1			D3Y5T0 / NP_001011601.1						0.0648744	n/a
MRJP/yellow 8	Major royal jelly protein 8	Growth; Nutrient storage/transport	n/a	n/a			1			Q6TGR0 / XP_006558989.1						0.00182972	n/a
MRJP/yellow 9	Major royal jelly protein 9	Growth; Nutrient storage/transport	n/a	n/a	1		1	E2AXM7	XP_011265869.1	Q4ZJX1 / NP_001019868.1		GFBD01003930				0.00249608	n/a
Notchless	notchless protein homolog 1	Notch signaling	Notchless	0	0	0	0	E2ACA7	XP_011255358.1	XP_006570052.2 / A0A087ZVU1	E9ILD0 / XP_011159131.1	GFBD01067347				0.000929228	nucleus [GO:0005634]
Npc2 2	epididymal secretory protein E1-like	Sterol- and Lipid-binding/transport	Npc2e	1	1	1	1	E2AIZ6	XP_011258918.1	A0A087ZTA5 / XP_001120220.1	XP_011159463.1	GFBD01009031		0.00616956		0.000318589	extracellular space [GO:0005615]
OBP Gp9 1	pheromone-binding protein Gp-9	Unknown	n/a	n/a		1					XP_011157711.1 / D1LYX5				0.0220903		n/a
OBP Gp9 2	pheromone-binding protein Gp-9-like	Unknown	n/a	n/a		0					XP_011169816.1 / D1LZ17				0.00929071		n/a
Phosphatase 2	Venom acid phosphatase Acph-1-like	Unknown	CG9451	1			1			A0A087ZRB6 / XP_006569958.1 / XP_006569959.1						0.00181222	extracellular exosome [GO:0070062]; nucleus [GO:0005634]
Phosphatase 3	Venom acid phosphatase Acph-1-like	Unknown	CG9451	1			1			A0A087ZRC8 / XP_006569973.1 / XP_001122458.1						0.00175409	extracellular exosome [GO:0070062]; nucleus [GO:0005634]
Phospholipase A1 1	phospholipase A1-like	Lipid metabolism	CG4582	0		1					XP_011173579.1 / Q68KK0				0.0143823		extracellular region [GO:0005576]
Phospholipase A1 2	phospholipase A1	Lipid metabolism	CG4582			1					XP_011173569.1 / PA1	GFBD01014639			0.0103023		extracellular region [GO:0005576]
Phospholipase A1 3	Phospholipase A1/venom	Lipid metabolism	CG5162	1		0					E9ITM3 / XP_011163016.1				0.00489994		extracellular space [GO:0005615]
Phospholipase A1 4	Venom phospholipase A1	Lipid metabolism	CG5162	1		0					E9ITM2 / XP_011163016.1				0.00592209		extracellular space [GO:0005615]
Prophenoloxidase	phenoloxidase 2	Defense	PPO2	0	0	0	0	E1ZXJ7	XP_011260780.1	Q86MV4 / NP_001011627.1	XP_011162616.1	GFBD01024340			0.0090699	0.00199577	extracellular region [GO:0005576]; extracellular space [GO:0005615]
Serine Protease 2	chymotrypsin-1-like	Proteolysis	CG17477	1	1	1			XP_011256502.1		XP_011164378.1	GFBD01037562			0.0153049		n/a
Serine Protease 4	chymotrypsin-1-like	Proteolysis	CG31269	1	1	1	1		XP_011252862.1	A0A087ZQP8	XP_011156956.1				0.00999621		n/a
Serine Protease 5	chymotrypsin-1-like	Proteolysis	CG9676	1		1	1			XP_001121121.2 / XP_624680.3	XP_011164376.1				0.00903609		n/a
Serine Protease 6	Venom protease	Proteolysis	CG1299	1	1	1	1		XP_011264155.1	A0A088ADM5 / XP_006560620.1	E9J1L2 / XP_011167330.1	GFBD01059384				0.00249906	n/a
Serine Protease 7	venom serine protease 34 isoform X2	Proteolysis	CG30375	1	0	0	0	E2AVR6	XP_011264834.1	XP_392669.1 / A0A087ZYX8	XP_011173694.1 / E9JDE1					0.000529873	n/a
Serpin 2	Serpin-5	Regulation of Proteolysis; Growth	Spn88Ea	1	0	1	1		XP_011250693.1	A0A088ASF2 / XP_006562425.1	XP_011165016.1	GFBD01027234				0.00266277	extracellular region [GO:0005576]; extracellular space [GO:0005615]
SMP30/Regucalcin 2	Regucalcin-like LOC413627	Ca2+ binding; Growth	smp-30/Regucalcin	0			1			A0A087ZSJ1 / XP_001121327.1 / XP_016768806.1						0.0181056	extracellular region [GO:0005576]; extracellular space [GO:0005615]; lipid particle [GO:0005811]
SMP30/Regucalcin 3	Regucalcin	Ca2+ binding; Growth	smp-30/Regucalcin	0			1			A0A087ZSJ0 / XP_016768806.1						0.0130117	extracellular region [GO:0005576]; extracellular space [GO:0005615]; lipid particle [GO:0005811]
Sugar Processing AGLU 1	alpha-glucosidase-like	Sugar Metabolism	Mal-B1	1	1	1	1	E2A8S5	XP_011253559.1	Q17058 / XP_006560870.1	E9IA43 / XP_011163449.1	GFBD01014992			0.0105975	0.102585	n/a
Sugar Processing AGLU 2	Alpha glucosidase	Sugar Metabolism	Mal-B1	1	1		1		XP_011253560.1	A0A087ZWK4 / XP_006560869.1						0.101987	n/a
Sugar Processing AMY 2	alpha-amylase A-like	Sugar Metabolism	Amy-p	1		1					E9ITJ5 / XP_011260424.1	GFBD01014475		0.0118531	0.00993826		extracellular region [GO:0005576]
Sugar Processing MAL 4	Maltase 1	Sugar Metabolism	CG14934	0	0			E2AIX4				GFBD01064588		0.0133986			n/a
Transferrin	transferrin	Defense	Tsf1	1	1	1	1	E2AVJ5	XP_011264740.1	A0A088AFH7 / NP_001011572.1	E9I8L1 / XP_011175285.1	GFBD01022865			0.0178712	0.00280633	extracellular region [GO:0005576]; plasma membrane [GO:0005886]
Ubiquitin processing	Tether containing UBX domain for GLUT4	Ubiquitin processing	CG33722	0	0	0	0	E2A732	XP_011252693.1	NP_001229363.1	XP_011176007.1	GFBD01023656				0.000543111	n/a
Unknown 1	comp54473_c0_seq1_1472_1624	Unknown	n/a	n/a	1			E1ZZ64				GFBD01022852		0.0301467			n/a
Unknown 3	Venom allergen 4	Unknown	CG1662	0	0	0	0		XP_011257100.1	A0A088A5A0	VA4 / XP_011163902.1				0.0130995		integral component of membrane [GO:0016021]
Unknown 4	Queen venom protein Sol i IV	Unknown	n/a	n/a		1					B1WA78 / XP_011172701.1				0.0102802		n/a
Unknown 5	Venom allergen 2 isoform X2	Unknown	n/a	n/a		1					XP_011156057.1				0.00976678		n/a
Unknown 6	Leucine-rich toll-like	Growth; Unknown	fish-lips	1	1	1	1		XP_011257736.1	XP_001122057.2 / XP_016767569.1	E9IB55 / XP_011168955.1				0.00469473		integral component of membrane [GO:0016021]
Venom Transcription Factor	Transcription factor venom allergen 2	DNA binding	doublesex-Mab related 99B	0		0	0			A0A088A598	VA2 / XP_011163959.1 / E9IVA2				0.0224147		nucleus [GO:0005634]
Vhdl, vitellogenin-like	Uncharacterized protein LOC105197040	Growth; Nutrient storage/transport	crossveinless d	1	1	1	1	E2A9P3	XP_011254034.1	A0A088AGQ0 / NP_001318046.1	XP_011161539.1 / E9IQQ0				0.0111434	0.000246502	extracellular space [GO:0005615]
Vitellogenin 1	Uncharacterized protein LOC105205865	Growth; Nutrient storage/transport	n/a	n/a		1					XP_011173700.1				0.00908842		n/a
