# Supplementary material for: Oral transfer of chemical cues, growth proteins and hormones in social insects
Source: eLife journal article supplement (doi:10.7554/elife.20375), 2016-11-28
Supplement: supp [file elife_poa_e20375_Figure_2_source_data_1.xlsx]

## Sheet: Sheet1
microRNAs	Sequence	Scaffolds	Start genomic orientation	End genomic orientation	Abundance with Dmel reads	Abundance without Dmel reads
miR-750	ccagaucuaacucuuccagcuca	NW_011882536.1	65873	65950	1733	1733
miR-A	ucagucuuuuucucucuccuau	NW_011883941.1	677886	677948	1474	493
miR-B	aggcaagaugucggcauagcuga	NW_011883649.1	367594	367654	760	459
miR-C	acccguagauccgaacuugugg	NW_011882012.1	184618	184681	452	407
miR-92b	aauugcaccagucccggccuga	NW_011883588.1	54746	54814	391	341
miR-92b		NW_011878817.1	246186	246245
miR-92b		NW_011883588.1	54518	54580
miR-12	agaguauugcaucagguacu	NW_011885320.1	1328261	1328322	283	279
miR-D	ucgagacuacaugcugauuuuca	NW_011877311.1	1050949	1051038	268	266
miR-E	ucucacuaucuugucuuucaug	NW_011879028.1	882137	882198	258	258
miR-317	ugaacacagcuggugguaucu	NW_011882028.1	158309	158367	799	261
miR-279a	ugacuagauacauacucuucu	NW_011887025.1	10537	10597	341	252
miR-279a		NW_011880635.1	50855	50911
miR-279a		NW_011887025.1	10211	10267
miR-279a		NW_011879304.1	58212	58274
miR-2796	guaggccggcggaaacuacuugc	NW_011882074.1	465316	465375	240	240
miR-3785	uacccuguaacguccugggacu	NW_011881898.1	192801	192864	182	182
miR-275	ucagguaccugaaguagcgcgcg	NW_011880646.1	89638	89704	462	170
miR-275		NW_011880025.1	791302	791362
miR-2	uaucacagccagcuuugaugag	NW_011879028.1	883691	883749	312	101
miR-2		NW_011879028.1	883135	883198
miR-2		NW_011879028.1	882705	882759
miR-2		NW_011881551.1	249852	249916
miR-2		NW_011879028.1	883321	883378
miR-87	augagcaaaguuucaggugugu	NW_011880235.1	232599	232660	73	70
miR-87		NW_011880235.1	232781	232863
miR-F	aagagagcuauccaucgacagu	NW_011879604.1	460930	460991	582	55
miR-G	uggugagugccaacgugugcgc	NW_011883941.1	3953	4010	57	53
bantam	ugagaucauugugaaagcugauu	NW_011887060.1	1214355	1214415	485	44
miR-263b	cuuggcacuggaagaauucacag	NW_011879232.1	138099	138161	65	36
miR-H	cggcaccuguuggagcgcaauuc	NW_011880646.1	89422	89482	78	32
miR-J	ucacagccagcuuugaugauc	NW_011879028.1	882507	882561	91	24
miR-375	uuuguucguucggcucgaguua	NW_011880137.1	176855	176915	23	23
miR-3477	uaaucucaugcgguaacuguga	NW_011885320.1	1327758	1327822	22	22
miR-K	ucgguaaacagaguguaagaacuu	NW_011877913.1	86044	86107	17	17
miR-1175	ugagauucaacuccuccaacuuau	NW_011882536.1	65705	65759	17	15
miR-318	ucacuggguaauauuugucucu	NW_011883688.1	92621	92680	14	14
miR-318		NW_011883688.1	87098	87157
miR-184	uggacggagaacugauaagggc	NW_011879658.1	26523	26585	4626	10
miR-190	agauauguuugauuuucuugguc	NW_011881650.1	80460	80520	11	9
miR-L	aagcauaacauuggacugguua	NW_011883256.1	94987	95043	9	9
miR-M	aagcauaacauuggacugguua	NW_011883256.1	94985	95041	9	9
miR-6039	gaucgaacgcgugaguuuacg	NW_011882475.1	156957	157016	8	8
miR-N	uuuagaauuccuacgcuuuacc	NW_011877016.1	220132	220190	41	8
miR-993	gaagcucgacucuacagguaucu	NW_011880863.1	95955	96017	18	8
miR-O	aucccggacgagcuccca	NW_011886600.1	28938	28987	10	7
miR-3791	ucaccgggugaugauugcauc	NW_011883688.1	87980	88035	7	7
miR-3791		NW_011883688.1	93503	93558
miR-P	cuuugguaauacagcucuauga	NW_011880025.1	791108	791166	8	7
miR-2788	caaugcccuuggaaaucccaaa	NW_011886387.1	103414	103477	5	5
miR-29b	uagcaccauuagaaaucaguacu	NW_011885120.1	59576	59639	5	5
miR-927a	uuuuagaauuuguacgcucugu	NW_011883884.1	94682	94744	5	5
miR-980	cagcugccuuuugaagggcaac	NW_011882540.1	23538	23595	5	5
miR-1	uggaauguaaagaaguauggag	NW_011877733.1	2598075	2598133	28	4
miR-7	uggaagacuagugauuuuguuguu	NW_011878817.1	338364	338424	41	4
miR-9a	ucuuugguuaucuagcuguauga	NW_011879667.1	15936	15997	93	4
miR-9a		NW_011883911.1	209404	209465
miR-9a		NW_011880675.1	732837	732898
miR-6001-3p	uucucuuugguuguuaccacu	NW_011880025.1	518639	518702	3	3
miR-307	ucacaaccuuuuugagugagcga	NW_011881423.1	537946	538021	2	2
miR-316	ugucuuuuuccgcuuugcugccg	NW_011884546.1	764318	764378	2	2
miR-278	ucggugggacuuucguccguu	NW_011881423.1	404521	404583	33	1
miR-283	aaauaucagcugguaauucug	NW_011885320.1	1326786	1326846	66	1
miR-315	uuuugauuguugcucagaaagcc	NW_011879023.1	14004	14065	36	1
miR-34	uggcagugugguuagcugguu	NW_011882028.1	181236	181300	181	1
