# Supplementary material for: Oral transfer of chemical cues, growth proteins and hormones in social insects
Source: eLife. 2016 Nov 29;5:e20375. doi: 10.7554/eLife.20375 (PMC5153251; doi:10.7554/eLife.20375)
Supplement: Supplementary file 1. [file elife-20375-supp1.xlsx]

## Sheet: Sheet1
Identifier	Genome Name
emb|HF677570.1|	Acetobacter pasteurianus 386B, complete genome
gb|KM005161.1|	Acetobacter pomorum strain L19SY15 16S ribosomal RNA gene, partial sequence
gb|CP003801.1|	Alpha proteobacterium HIMB59, complete genome
ref|NR_075010.1|	Candidatus Blochmannia floridanus 16S ribosomal RNA, complete sequence
gb|KF907455.1|	Cryptomonas tetrapyrenoidosa strain Yeongildong111310B 23S large subunit ribosomal RNA gene, partial sequence; plastid
gb|KM198929.1|	Cyanophora paradoxa strain NIES-763 cyanelle, partial genome
gb|CP004373.1|	Gluconobacter oxydans DSM 3504, complete genome
gb|CP003926.1|	Gluconobacter oxydans H24, complete genome
gb|CP003183.1|	Granulibacter bethesdensis CGDNIH2, complete genome
ref|NR_122001.1|	Komagataeibacter xylinus strain E25 23S ribosomal RNA gene, complete sequence
dbj|AP012167.1|	Lactobacillus brevis KB290 DNA, complete genome
gb|EU161617.1|	Lactobacillus hilgardii strain ATCC 8290 16S-23S ribosomal RNA intergenic spacer and 23S ribosomal RNA gene, partial sequence
ref|NR_076798.1|	Rhodomicrobium vannielii strain ATCC 17100 23S ribosomal RNA gene, complete sequence
gb|CP000031.2|	Ruegeria pomeroyi DSS-3, complete genome
gb|AY869021.1|	Uncultured alpha proteobacterium clone I50-0134 16S ribosomal RNA gene, partial sequence
gb|GU474910.1|	Uncultured alpha proteobacterium HF0070_34A12 genomic sequence
gb|KJ424420.1|	Uncultured bacterium clone 4C1-187 16S ribosomal RNA gene, partial sequence
gb|JN846916.1|	Uncultured bacterium clone BB039G11 16S ribosomal RNA gene, partial sequence
gb|GU925125.1|	Uncultured bacterium clone F5K2Q4C04JR31D 23S ribosomal RNA gene, partial sequence
gb|GU925732.1|	Uncultured bacterium clone F5K2Q4C04JYKSI 23S ribosomal RNA gene, partial sequence
gb|JN846901.1|	Uncultured bacterium clone FF019B7 16S ribosomal RNA gene, partial sequence
