# Supplementary material for: Oral transfer of chemical cues, growth proteins and hormones in social insects
Source: eLife. 2016 Nov 29;5:e20375. doi: 10.7554/eLife.20375 (PMC5153251; doi:10.7554/eLife.20375)
Supplement: Supplementary file 2. [file elife-20375-supp2.xlsx]

## Sheet: Sample list
Date	Experiment	Species	Origin	Internal #	Colony	Sample name	Fractions	MS Instrument	HPLC column	Method	Database
16-02-2012	Fluid Comparison	Camponotus floridanus	trophallactic fluid - voluntary	4996	Mix	Stolen - 17.02	2	LTQ-OT XL	PepMap 25cm	FTMS_10ITMSMS-CID-125min-Cplxe-LC-Dionex	UniProt_ID 2015_12
21-02-2012	Fluid Comparison	Camponotus floridanus	trophallactic fluid - voluntary	5011	Mix	Stolen	2	LTQ-OT XL	PepMap 25cm	FTMS_10ITMSMS-CID-125min-Cplxe-LC-Dionex	UniProt_ID 2015_12
19-07-2013	Fluid Comparison	Camponotus floridanus	nurses hemolymph	6076	A23	A23	3	LTQ-OT XL	Nikkyo 15cm	FTMS_10ITMSMS-CID-125min-Cplxe-LC-Dionex-packed-col-new	UniProt_ID 2015_12
19-07-2013	Fluid Comparison	Camponotus floridanus	foragers hemolymph	6077	A23	A23	3	LTQ-OT XL	Nikkyo 15cm	FTMS_10ITMSMS-CID-125min-Cplxe-LC-Dionex-packed-col-new	UniProt_ID 2015_12
19-07-2013	Fluid Comparison	Camponotus floridanus	nurses hemolymph	6078	A4	A4	3	LTQ-OT XL	Nikkyo 15cm	FTMS_10ITMSMS-CID-125min-Cplxe-LC-Dionex-packed-col-new	UniProt_ID 2015_12
19-07-2013	Fluid Comparison	Camponotus floridanus	foragers hemolymph	6079	A4	A4	3	LTQ-OT XL	Nikkyo 15cm	FTMS_10ITMSMS-CID-125min-Cplxe-LC-Dionex-packed-col-new	UniProt_ID 2015_12
19-07-2013	Fluid Comparison	Camponotus floridanus	nurses hemolymph	6080	A16	A16	3	LTQ-OT XL	Nikkyo 15cm	FTMS_10ITMSMS-CID-125min-Cplxe-LC-Dionex-packed-col-new	UniProt_ID 2015_12
19-07-2013	Fluid Comparison	Camponotus floridanus	foragers hemolymph	6081	A16	A16	3	LTQ-OT XL	Nikkyo 15cm	FTMS_10ITMSMS-CID-125min-Cplxe-LC-Dionex-packed-col-new	UniProt_ID 2015_12
24-10-2014	Orthology	Apis mellifera	trophallactic fluid	7083	Mont Blanc	MB-F	2	Velos	PepMap 25cm	Top20_enhanced_95min_lock_load_7ul	Apis_mellifera_NCBI_02-2016/UniProtKB_Apis-mellifera 20150901
24-10-2014	Orthology	Apis mellifera	trophallactic fluid	7084	Dent d'Oche	DO-F	2	Velos	PepMap 25cm	Top20_enhanced_95min_lock_load_7ul	Apis_mellifera_NCBI_02-2016/UniProtKB_Apis-mellifera 20150901
24-10-2014	Orthology	Apis mellifera	trophallactic fluid	7085	Tete C	TC-N	2	Velos	PepMap 25cm	Top20_enhanced_95min_lock_load_7ul	Apis_mellifera_NCBI_02-2016/UniProtKB_Apis-mellifera 20150901
24-10-2014	Orthology	Apis mellifera	trophallactic fluid	7086	Tete C	TC-F	2	Velos	PepMap 25cm	Top20_enhanced_95min_lock_load_7ul	Apis_mellifera_NCBI_02-2016/UniProtKB_Apis-mellifera 20150901
24-10-2014	Orthology	Apis mellifera	trophallactic fluid	7087	Korea	Korea-N	2	Velos	PepMap 25cm	Top20_enhanced_95min_lock_load_7ul	Apis_mellifera_NCBI_02-2016/UniProtKB_Apis-mellifera 20150901
24-10-2014	Orthology	Apis mellifera	trophallactic fluid	7088	Korea	Korea-F	2	Velos	PepMap 25cm	Top20_enhanced_95min_lock_load_7ul	Apis_mellifera_NCBI_02-2016/UniProtKB_Apis-mellifera 20150901
24-10-2014	Orthology	Camponotus fellah	nurse trophallactic fluid	7101	Cfel-N5	Cfel-N5	3	QExactive Plus	EasySpray 25cm	Top10_ID_65min_100ms_lock_load_7ul	Camponotus_fellah_LeBoeuf 031114 + UniProt_ID 2015_12
24-10-2014	Orthology	Camponotus fellah	forager trophallactic fluid	7102	Cfel-F5	Cfel-F5	3	QExactive Plus	EasySpray 25cm	Top10_ID_65min_100ms_lock_load_7ul	Camponotus_fellah_LeBoeuf 031114 + UniProt_ID 2015_12
24-10-2014	Orthology	Camponotus fellah	nurse trophallactic fluid	7103	Cfel-N28	Cfel-N28	3	QExactive Plus	EasySpray 25cm	Top10_ID_65min_100ms_lock_load_7ul	Camponotus_fellah_LeBoeuf 031114 + UniProt_ID 2015_12
24-10-2014	Orthology	Camponotus fellah	forager trophallactic fluid	7104	Cfel-F28	Cfel-F28	3	QExactive Plus	EasySpray 25cm	Top10_ID_65min_100ms_lock_load_7ul	Camponotus_fellah_LeBoeuf 031114 + UniProt_ID 2015_12
24-10-2014	Orthology	Camponotus fellah	nurse trophallactic fluid	7105	Cfel-N33	Cfel-N33	3	QExactive Plus	EasySpray 25cm	Top10_ID_65min_100ms_lock_load_7ul	Camponotus_fellah_LeBoeuf 031114 + UniProt_ID 2015_12
24-10-2014	Orthology	Camponotus fellah	forager trophallactic fluid	7106	Cfel-F33	Cfel-F33	3	QExactive Plus	EasySpray 25cm	Top10_ID_65min_100ms_lock_load_7ul	Camponotus_fellah_LeBoeuf 031114 + UniProt_ID 2015_12
02-12-2014	Fluid Comparison	Camponotus floridanus	midgut	7167	Mix	Midgut 1	3	QExactive Plus	EasySpray 25cm	Top10_ID_65min_250ms_lock_load_7ul	UniProt_ID 2014_08
02-12-2014	Fluid Comparison	Camponotus floridanus	midgut	7168	Mix	Midgut 2	3	QExactive Plus	EasySpray 25cm	Top10_ID_65min_250ms_lock_load_7ul	UniProt_ID 2014_08
02-12-2014	Fluid Comparison	Camponotus floridanus	midgut	7169	Mix	Midgut 3	3	QExactive Plus	EasySpray 25cm	Top10_ID_65min_250ms_lock_load_7ul	UniProt_ID 2014_08
01-12-2014	Fluid Comparison	Camponotus floridanus	trophallactic fluid - voluntary	7171	Mix	Stolen	3	QExactive Plus	EasySpray 25cm	Top10_ID_65min_250ms_lock_load_7ul	UniProt_ID 2014_08
01-12-2014	Fluid Comparison	Camponotus floridanus	trophallactic fluid - voluntary	7172	Mix	Stolen	3	QExactive Plus	EasySpray 25cm	Top10_ID_65min_250ms_lock_load_7ul	UniProt_ID 2014_08
19-02-2015	Orthology	Solenopsis invicta	trophallactic fluid	7289	PW12	FBb	4	QExactive Plus	EasySpray 25cm	Top10_ID_65min_250ms_lock_load_7ul	Solenopsis-invicta-NCBI-01-2015/UniProt_ID 2014_08
19-02-2015	Orthology	Solenopsis invicta	trophallactic fluid	7292	PW14	FBb	4	QExactive Plus	EasySpray 25cm	Top10_ID_65min_250ms_lock_load_7ul	Solenopsis-invicta-NCBI-01-2015/UniProt_ID 2014_08
19-02-2015	Orthology	Solenopsis invicta	trophallactic fluid	7294	MC2	FBB	4	QExactive Plus	EasySpray 25cm	Top10_ID_65min_250ms_lock_load_7ul	Solenopsis-invicta-NCBI-01-2015/UniProt_ID 2014_08
19-06-2015	Isolation/Fluid Comparision	Camponotus floridanus	trophallactic fluid	7588	A24	G-d0-A24	2	QExactive Plus	EasySpray 50cm	Top10_ID_65min_250ms_lock_load_7ul_grd-50cm	Cfloridanus_NCBI_23july2015/UniProt_ID 2014_08
19-06-2015	Isolation/Fluid Comparision	Camponotus floridanus	trophallactic fluid	7589	A16	G-d0-A16	2	QExactive Plus	EasySpray 50cm	Top10_ID_65min_250ms_lock_load_7ul_grd-50cm	Cfloridanus_NCBI_23july2015/UniProt_ID 2014_08
19-06-2015	Isolation/Fluid Comparision	Camponotus floridanus	trophallactic fluid	7590	A17	G-d0-A17	2	QExactive Plus	EasySpray 50cm	Top10_ID_65min_250ms_lock_load_7ul_grd-50cm	Cfloridanus_NCBI_23july2015/UniProt_ID 2014_08
19-06-2015	Isolation/Fluid Comparision	Camponotus floridanus	trophallactic fluid	7591	A18	G-d0-A18	2	QExactive Plus	EasySpray 50cm	Top10_ID_65min_250ms_lock_load_7ul_grd-50cm	Cfloridanus_NCBI_23july2015/UniProt_ID 2014_08
19-06-2015	Isolation/Fluid Comparision	Camponotus floridanus	trophallactic fluid	7592	A6	G-d0-A6	2	QExactive Plus	EasySpray 50cm	Top10_ID_65min_250ms_lock_load_7ul_grd-50cm	Cfloridanus_NCBI_23july2015/UniProt_ID 2014_08
19-06-2015	Isolation/Fluid Comparision	Camponotus floridanus	trophallactic fluid	7593	A9	G-d0-A9	2	QExactive Plus	EasySpray 50cm	Top10_ID_65min_250ms_lock_load_7ul_grd-50cm	Cfloridanus_NCBI_23july2015/UniProt_ID 2014_08
19-06-2015	Fluid Comparision	Camponotus floridanus	trophallactic fluid	7594	A24	I-d0-A24	2	QExactive Plus	EasySpray 50cm	Top10_ID_65min_250ms_lock_load_7ul_grd-50cm	Cfloridanus_NCBI_23july2015/UniProt_ID 2014_08
19-06-2015	Fluid Comparision	Camponotus floridanus	trophallactic fluid	7595	A16	I-d0-A16	2	QExactive Plus	EasySpray 50cm	Top10_ID_65min_250ms_lock_load_7ul_grd-50cm	Cfloridanus_NCBI_23july2015/UniProt_ID 2014_08
19-06-2015	Fluid Comparision	Camponotus floridanus	trophallactic fluid	7596	A17	I-d0-A17	2	QExactive Plus	EasySpray 50cm	Top10_ID_65min_250ms_lock_load_7ul_grd-50cm	Cfloridanus_NCBI_23july2015/UniProt_ID 2014_08
19-06-2015	Isolation Experiment	Camponotus floridanus	trophallactic fluid	7606	A24	G-d14-A24	2	QExactive Plus	EasySpray 50cm	Top10_ID_65min_250ms_lock_load_7ul_grd-50cm	Cfloridanus_NCBI_23july2015/UniProt_ID 2014_08
19-06-2015	Isolation Experiment	Camponotus floridanus	trophallactic fluid	7607	A16	G-d14-A16	2	QExactive Plus	EasySpray 50cm	Top10_ID_65min_250ms_lock_load_7ul_grd-50cm	Cfloridanus_NCBI_23july2015/UniProt_ID 2014_08
19-06-2015	Isolation Experiment	Camponotus floridanus	trophallactic fluid	7608	A17	G-d14-A17	2	QExactive Plus	EasySpray 50cm	Top10_ID_65min_250ms_lock_load_7ul_grd-50cm	Cfloridanus_NCBI_23july2015/UniProt_ID 2014_08
19-06-2015	Isolation Experiment	Camponotus floridanus	trophallactic fluid	7609	A18	G-d14-A18	2	QExactive Plus	EasySpray 50cm	Top10_ID_65min_250ms_lock_load_7ul_grd-50cm	Cfloridanus_NCBI_23july2015/UniProt_ID 2014_08
19-06-2015	Isolation Experiment	Camponotus floridanus	trophallactic fluid	7610	A6	G-d14-A6	2	QExactive Plus	EasySpray 50cm	Top10_ID_65min_250ms_lock_load_7ul_grd-50cm	Cfloridanus_NCBI_23july2015/UniProt_ID 2014_08
19-06-2015	Isolation Experiment	Camponotus floridanus	trophallactic fluid	7611	A9	G-d14-A9	2	QExactive Plus	EasySpray 50cm	Top10_ID_65min_250ms_lock_load_7ul_grd-50cm	Cfloridanus_NCBI_23july2015/UniProt_ID 2014_08
