# Supplementary material for: Oral transfer of chemical cues, growth proteins and hormones in social insects
Source: eLife. 2016 Nov 29;5:e20375. doi: 10.7554/eLife.20375 (PMC5153251; doi:10.7554/eLife.20375)
Supplement: Supplementary file 3. [file elife-20375-supp3.xlsx]

## Sheet: OrthologousGroups.txt
OMA13424	Amelprot:gi|110763414|ref|XP_392080.3| PREDICTED: anionic trypsin-2 [Apis mellifera]	Cfelprot80:comp32993_c0_seq1_91_832	Cfloprot:gi|752864213|ref|XP_011268501.1| PREDICTED: trypsin-like [Camponotus floridanus]	Sinvprot:gi|751198574|ref|XP_011175738.1| PREDICTED: anionic trypsin-2-like [Solenopsis invicta]	uniprot-apis3AUP000005203:tr|A0A088A984|A0A088A984_APIME Uncharacterized protein OS=Apis mellifera GN=SP44 PE=3 SV=1	uniprot-cflo3AUP000000311:tr|E1ZZV4|E1ZZV4_CAMFO Putative trypsin-6 OS=Camponotus floridanus GN=EAG_16344 PE=3 SV=1	uniprot-sinv3AUP000006539:tr|E9I849|E9I849_SOLIN Putative uncharacterized protein (Fragment) OS=Solenopsis invicta GN=SINV_15253 PE=3 SV=1
OMA00222	Amelprot:gi|328785413|ref|XP_624665.2| PREDICTED: acetyl-CoA carboxylase-like isoformX2 [Apis mellifera]	Cfelprot80:comp45860_c0_seq1_1_5766	Cfloprot:gi|752883057|ref|XP_011259212.1| PREDICTED: acetyl-CoA carboxylase isoform X2 [Camponotus floridanus]	Sinvprot:gi|751198602|ref|XP_011156206.1| PREDICTED: acetyl-CoA carboxylase [Solenopsis invicta]	uniprot-apis3AUP000005203:tr|A0A088AD15|A0A088AD15_APIME Uncharacterized protein OS=Apis mellifera GN=LOC552286 PE=4 SV=1	uniprot-cflo3AUP000000311:tr|E2AJI5|E2AJI5_CAMFO Acetyl-CoA carboxylase OS=Camponotus floridanus GN=EAG_07738 PE=4 SV=1	uniprot-sinv3AUP000006539:tr|E9I854|E9I854_SOLIN Putative uncharacterized protein (Fragment) OS=Solenopsis invicta GN=SINV_15956 PE=4 SV=1
OMA00757	Amelprot:gi|571564738|ref|XP_006565247.1| PREDICTED: rho GTPase-activating protein 32-like isoform X2 [Apis mellifera]	Cfelprot80:comp60428_c0_seq1_1_2989	Cfloprot:gi|752883041|ref|XP_011259204.1| PREDICTED: rho GTPase-activating protein 32 [Camponotus floridanus]	Sinvprot:gi|751198604|ref|XP_011156323.1| PREDICTED: GTPase-activating protein CdGAPr [Solenopsis invicta]	uniprot-apis3AUP000005203:tr|A0A088AD52|A0A088AD52_APIME Uncharacterized protein OS=Apis mellifera GN=LOC552265 PE=4 SV=1	uniprot-cflo3AUP000000311:tr|E2AJI4|E2AJI4_CAMFO Rho/Cdc42/Rac GTPase-activating protein RICS OS=Camponotus floridanus GN=EAG_07737 PE=4 SV=1	uniprot-sinv3AUP000006539:tr|E9I856|E9I856_SOLIN Putative uncharacterized protein (Fragment) OS=Solenopsis invicta GN=SINV_80213 PE=4 SV=1
OMA08547	Amelprot:gi|328785416|ref|XP_001120669.2| PREDICTED: leucine-rich repeat neuronal protein 1-like [Apis mellifera]	Cfelprot80:comp61544_c1_seq1_3757_4116	Cfloprot:gi|752883037|ref|XP_011259202.1| PREDICTED: slit homolog 1 protein-like [Camponotus floridanus]	Sinvprot:gi|751198617|ref|XP_011157014.1| PREDICTED: protein slit-like [Solenopsis invicta]	uniprot-apis3AUP000005203:tr|A0A088AD10|A0A088AD10_APIME Uncharacterized protein OS=Apis mellifera GN=LOC724772 PE=4 SV=1	uniprot-cflo3AUP000000311:tr|E2AJI2|E2AJI2_CAMFO Leucine-rich repeat neuronal protein 1 OS=Camponotus floridanus GN=EAG_07735 PE=4 SV=1	uniprot-sinv3AUP000006539:tr|E9I858|E9I858_SOLIN Putative uncharacterized protein (Fragment) OS=Solenopsis invicta GN=SINV_09448 PE=4 SV=1
OMA08837	Amelprot:gi|571564792|ref|XP_006565258.1| PREDICTED: homeobox protein PKNOX2-like isoform X3 [Apis mellifera]	Cfelprot80:comp60345_c0_seq1_1931_2368	Cfloprot:gi|752883033|ref|XP_011259200.1| PREDICTED: homeobox protein PKNOX2-like [Camponotus floridanus]	Sinvprot:gi|751198619|ref|XP_011157118.1| PREDICTED: homeobox protein PKNOX2-like [Solenopsis invicta]	uniprot-apis3AUP000005203:tr|A0A088AD53|A0A088AD53_APIME Uncharacterized protein OS=Apis mellifera GN=LOC724727 PE=4 SV=1	uniprot-cflo3AUP000000311:tr|E2AJI1|E2AJI1_CAMFO Homeobox protein homothorax OS=Camponotus floridanus GN=EAG_07734 PE=4 SV=1	uniprot-sinv3AUP000006539:tr|E9I859|E9I859_SOLIN Putative uncharacterized protein (Fragment) OS=Solenopsis invicta GN=SINV_08451 PE=4 SV=1
OMA05762	Amelprot:gi|328785419|ref|XP_624559.3| PREDICTED: nicastrin isoform X2 [Apis mellifera]	Cfelprot80:comp46762_c0_seq2_446_2248	Cfloprot:gi|752883030|ref|XP_011259199.1| PREDICTED: nicastrin [Camponotus floridanus]	Sinvprot:gi|751198625|ref|XP_011157387.1| PREDICTED: nicastrin [Solenopsis invicta]	uniprot-apis3AUP000005203:tr|A0A088AD09|A0A088AD09_APIME Uncharacterized protein OS=Apis mellifera GN=nct PE=4 SV=1	uniprot-cflo3AUP000000311:tr|E2AJI0|E2AJI0_CAMFO Nicastrin OS=Camponotus floridanus GN=EAG_07733 PE=4 SV=1	uniprot-sinv3AUP000006539:tr|E9I860|E9I860_SOLIN Putative uncharacterized protein (Fragment) OS=Solenopsis invicta GN=SINV_14168 PE=4 SV=1
OMA07809	Amelprot:gi|571531704|ref|XP_006570251.1| PREDICTED: protein aurora borealis [Apis mellifera]	Cfelprot80:comp66085_c0_seq1_233_1673	Cfloprot:gi|752883117|ref|XP_011259246.1| PREDICTED: protein aurora borealis [Camponotus floridanus]	Sinvprot:gi|751198627|ref|XP_011157495.1| PREDICTED: protein aurora borealis [Solenopsis invicta]	uniprot-apis3AUP000005203:tr|A0A088A333|A0A088A333_APIME Uncharacterized protein OS=Apis mellifera GN=bora PE=4 SV=1	uniprot-cflo3AUP000000311:tr|E2AJK2|E2AJK2_CAMFO Protein aurora borealis OS=Camponotus floridanus GN=EAG_07755 PE=4 SV=1	uniprot-sinv3AUP000006539:tr|E9I861|E9I861_SOLIN Putative uncharacterized protein (Fragment) OS=Solenopsis invicta GN=SINV_12125 PE=4 SV=1
OMA07455	Amelprot:gi|571562038|ref|XP_006566805.1| PREDICTED: forkhead box protein N3-like [Apis mellifera]	Cfelprot80:comp60901_c0_seq4_118_1531	Cfloprot:gi|752883115|ref|XP_011259245.1| PREDICTED: LOW QUALITY PROTEIN: forkhead box protein N3-like [Camponotus floridanus]	Sinvprot:gi|751198629|ref|XP_011157605.1| PREDICTED: forkhead box protein N3-like isoform X1 [Solenopsis invicta]	uniprot-apis3AUP000005203:tr|A0A088A236|A0A088A236_APIME Uncharacterized protein OS=Apis mellifera GN=LOC552820 PE=4 SV=1	uniprot-cflo3AUP000000311:tr|E2AJK1|E2AJK1_CAMFO Forkhead box protein N3 OS=Camponotus floridanus GN=EAG_07754 PE=4 SV=1	uniprot-sinv3AUP000006539:tr|E9I862|E9I862_SOLIN Putative uncharacterized protein (Fragment) OS=Solenopsis invicta GN=SINV_10077 PE=4 SV=1
OMA06144	Amelprot:gi|571562031|ref|XP_006566804.1| PREDICTED: rab GTPase-binding effector protein 1-like isoform X2 [Apis mellifera]	Cfelprot80:comp46107_c0_seq1_494_2330	Cfloprot:gi|752883109|ref|XP_011259242.1| PREDICTED: rab GTPase-binding effector protein 1 isoform X2 [Camponotus floridanus]	Sinvprot:gi|751198641|ref|XP_011158154.1| PREDICTED: rab GTPase-binding effector protein 1 isoform X2 [Solenopsis invicta]	uniprot-apis3AUP000005203:tr|A0A088A0Y0|A0A088A0Y0_APIME Uncharacterized protein OS=Apis mellifera GN=LOC726432 PE=4 SV=1	uniprot-cflo3AUP000000311:tr|E2AJJ9|E2AJJ9_CAMFO Rab GTPase-binding effector protein 1 OS=Camponotus floridanus GN=EAG_07752 PE=4 SV=1	uniprot-sinv3AUP000006539:tr|E9I863|E9I863_SOLIN Putative uncharacterized protein (Fragment) OS=Solenopsis invicta GN=SINV_04179 PE=4 SV=1
OMA06800	Amelprot:gi|328787185|ref|XP_395464.3| PREDICTED: amyloid protein-binding protein 2 [Apis mellifera]	Cfelprot80:comp55396_c0_seq1_71_1812	Cfloprot:gi|752883105|ref|XP_011259240.1| PREDICTED: amyloid protein-binding protein 2 [Camponotus floridanus]	Sinvprot:gi|751198643|ref|XP_011158266.1| PREDICTED: amyloid protein-binding protein 2 [Solenopsis invicta]	uniprot-apis3AUP000005203:tr|A0A088A234|A0A088A234_APIME Uncharacterized protein OS=Apis mellifera GN=Pat1 PE=4 SV=1	uniprot-cflo3AUP000000311:tr|E2AJJ8|E2AJJ8_CAMFO Amyloid protein-binding protein 2 OS=Camponotus floridanus GN=EAG_07751 PE=4 SV=1	uniprot-sinv3AUP000006539:tr|E9I864|E9I864_SOLIN Putative uncharacterized protein (Fragment) OS=Solenopsis invicta GN=SINV_04037 PE=4 SV=1
OMA17110	Amelprot:gi|48103887|ref|XP_392903.1| PREDICTED: ras-related protein Rab-18-B [Apis mellifera]	Cfelprot80:comp65444_c3_seq1_2026_2614	Cfloprot:gi|752862844|ref|XP_011264986.1| PREDICTED: ras-related protein Rab-18-B [Camponotus floridanus]	Sinvprot:gi|751198645|ref|XP_011158376.1| PREDICTED: ras-related protein Rab-18-B [Solenopsis invicta]	uniprot-apis3AUP000005203:tr|A0A088AW65|A0A088AW65_APIME Uncharacterized protein OS=Apis mellifera GN=Rab-RP4 PE=4 SV=1	uniprot-cflo3AUP000000311:tr|E1ZYD5|E1ZYD5_CAMFO Ras-related protein Rab-18 OS=Camponotus floridanus GN=EAG_06476 PE=3 SV=1	uniprot-sinv3AUP000006539:tr|E9I865|E9I865_SOLIN Putative uncharacterized protein (Fragment) OS=Solenopsis invicta GN=SINV_08216 PE=3 SV=1
OMA08769	Amelprot:gi|66562328|ref|XP_392946.2| PREDICTED: protein RCC2 homolog [Apis mellifera]	Cfelprot80:comp60775_c0_seq1_1675_1830	Cfloprot:gi|752862842|ref|XP_011264973.1| PREDICTED: protein RCC2 homolog [Camponotus floridanus]	Sinvprot:gi|751198647|ref|XP_011158499.1| PREDICTED: protein RCC2 homolog [Solenopsis invicta]	uniprot-apis3AUP000005203:tr|A0A088AW62|A0A088AW62_APIME Uncharacterized protein OS=Apis mellifera GN=LOC409433 PE=4 SV=1	uniprot-cflo3AUP000000311:tr|E1ZYD4|E1ZYD4_CAMFO Protein RCC2-like protein OS=Camponotus floridanus GN=EAG_06475 PE=4 SV=1	uniprot-sinv3AUP000006539:tr|E9I867|E9I867_SOLIN Putative uncharacterized protein (Fragment) OS=Solenopsis invicta GN=SINV_03602 PE=4 SV=1
OMA00082	Amelprot:gi|571578416|ref|XP_006572390.1| PREDICTED: protein SZT2-like isoform X1 [Apis mellifera]	Cfelprot80:comp58317_c1_seq3_9187_9266	Cfloprot:gi|752884682|ref|XP_011260093.1| PREDICTED: protein SZT2-like [Camponotus floridanus]	Sinvprot:gi|751198912|ref|XP_011171627.1| PREDICTED: protein SZT2-like [Solenopsis invicta]	uniprot-apis3AUP000005203:tr|A0A088AG91|A0A088AG91_APIME Uncharacterized protein OS=Apis mellifera GN=LOC100578661 PE=4 SV=1	uniprot-cflo3AUP000000311:tr|E2AL18|E2AL18_CAMFO Uncharacterized protein KIAA0467 OS=Camponotus floridanus GN=EAG_06988 PE=4 SV=1	uniprot-sinv3AUP000006539:tr|E9I890|E9I890_SOLIN Putative uncharacterized protein (Fragment) OS=Solenopsis invicta GN=SINV_11339 PE=4 SV=1
OMA07746	Amelprot:gi|66565732|ref|XP_624475.1| PREDICTED: 5-aminolevulinate synthase, erythroid-specific, mitochondrial-like [Apis mellifera]	Cfelprot80:comp38619_c0_seq1_229_1795	Cfloprot:gi|752884684|ref|XP_011260094.1| PREDICTED: 5-aminolevulinate synthase, erythroid-specific, mitochondrial isoform X1 [Camponotus floridanus]	Sinvprot:gi|751198916|ref|XP_011171793.1| PREDICTED: 5-aminolevulinate synthase, erythroid-specific, mitochondrial [Solenopsis invicta]	uniprot-apis3AUP000005203:tr|A0A088A7V3|A0A088A7V3_APIME 5-aminolevulinate synthase OS=Apis mellifera GN=LOC413228 PE=3 SV=1	uniprot-cflo3AUP000000311:tr|E2AL19|E2AL19_CAMFO 5-aminolevulinate synthase OS=Camponotus floridanus GN=EAG_06989 PE=3 SV=1	uniprot-sinv3AUP000006539:tr|E9I891|E9I891_SOLIN 5-aminolevulinate synthase (Fragment) OS=Solenopsis invicta GN=SINV_14504 PE=3 SV=1
OMA13164	Amelprot:gi|571507866|ref|XP_006571227.1| PREDICTED: beta-1,4-N-acetylgalactosaminyltransferase bre-4 isoform X3 [Apis mellifera]	Cfelprot80:comp46256_c0_seq1_138_1039	Cfloprot:gi|752884688|ref|XP_011260096.1| PREDICTED: beta-1,4-galactosyltransferase 4 [Camponotus floridanus]	Sinvprot:gi|751198918|ref|XP_011171884.1| PREDICTED: beta-1,4-N-acetylgalactosaminyltransferase bre-4-like [Solenopsis invicta]	uniprot-apis3AUP000005203:tr|A0A087ZTS7|A0A087ZTS7_APIME Uncharacterized protein OS=Apis mellifera PE=4 SV=1	uniprot-cflo3AUP000000311:tr|E2AL20|E2AL20_CAMFO Beta-1,4-N-acetylgalactosaminyltransferase bre-4 OS=Camponotus floridanus GN=EAG_06990 PE=4 SV=1	uniprot-sinv3AUP000006539:tr|E9I892|E9I892_SOLIN Putative uncharacterized protein (Fragment) OS=Solenopsis invicta GN=SINV_03838 PE=4 SV=1
OMA02958	Amelprot:gi|571507863|ref|XP_006571226.1| PREDICTED: RNA-binding protein 5-like [Apis mellifera]	Cfelprot80:comp57508_c0_seq3_1775_3771	Cfloprot:gi|752884690|ref|XP_011260097.1| PREDICTED: RNA-binding protein 5-like [Camponotus floridanus]	Sinvprot:gi|751198920|ref|XP_011171993.1| PREDICTED: RNA-binding protein 5-like [Solenopsis invicta]	uniprot-apis3AUP000005203:tr|A0A087ZTQ7|A0A087ZTQ7_APIME Uncharacterized protein OS=Apis mellifera GN=LOC410688 PE=4 SV=1	uniprot-cflo3AUP000000311:tr|E2AL21|E2AL21_CAMFO RNA-binding protein 10 OS=Camponotus floridanus GN=EAG_06991 PE=4 SV=1	uniprot-sinv3AUP000006539:tr|E9I893|E9I893_SOLIN Putative uncharacterized protein (Fragment) OS=Solenopsis invicta GN=SINV_03072 PE=4 SV=1
OMA09015	Amelprot:gi|66500205|ref|XP_393509.2| PREDICTED: mitochondrial-processing peptidase subunit beta-like [Apis mellifera]	Cfelprot80:comp66802_c0_seq1_1339_1528	Cfloprot:gi|752884692|ref|XP_011260098.1| PREDICTED: mitochondrial-processing peptidase subunit beta [Camponotus floridanus]	Sinvprot:gi|751198922|ref|XP_011172112.1| PREDICTED: mitochondrial-processing peptidase subunit beta [Solenopsis invicta]	uniprot-apis3AUP000005203:tr|A0A088A820|A0A088A820_APIME Uncharacterized protein OS=Apis mellifera GN=LOC410022 PE=3 SV=1	uniprot-cflo3AUP000000311:tr|E2AL22|E2AL22_CAMFO Mitochondrial-processing peptidase subunit beta OS=Camponotus floridanus GN=EAG_06992 PE=3 SV=1	uniprot-sinv3AUP000006539:tr|E9I894|E9I894_SOLIN Putative uncharacterized protein (Fragment) OS=Solenopsis invicta GN=SINV_10420 PE=3 SV=1
OMA07830	Amelprot:gi|328792541|ref|XP_001120991.2| PREDICTED: UDP-glucuronosyltransferase 1-8-like [Apis mellifera]	Cfelprot80:comp57133_c0_seq1_250_1628	Cfloprot:gi|752892217|ref|XP_011264183.1| PREDICTED: UDP-glucuronosyltransferase 2B33-like [Camponotus floridanus]	Sinvprot:gi|751198926|ref|XP_011172293.1| PREDICTED: UDP-glucuronosyltransferase 2B23-like isoform X2 [Solenopsis invicta]	uniprot-apis3AUP000005203:tr|A0A088AVU5|A0A088AVU5_APIME UDP-glucuronosyltransferase OS=Apis mellifera GN=LOC725106 PE=3 SV=1	uniprot-cflo3AUP000000311:tr|E2AUH8|E2AUH8_CAMFO UDP-glucuronosyltransferase OS=Camponotus floridanus GN=EAG_15830 PE=3 SV=1	uniprot-sinv3AUP000006539:tr|E9I897|E9I897_SOLIN UDP-glucuronosyltransferase (Fragment) OS=Solenopsis invicta GN=SINV_08363 PE=3 SV=1
OMA06862	Amelprot:gi|66526281|ref|XP_396852.2| PREDICTED: scavenger receptor class B member 1 [Apis mellifera]	Cfelprot80:comp65372_c0_seq1_415_2077	Cfloprot:gi|752861462|ref|XP_011257564.1| PREDICTED: scavenger receptor class B member 1 [Camponotus floridanus]	Sinvprot:gi|751198684|ref|XP_011160939.1| PREDICTED: scavenger receptor class B member 1 [Solenopsis invicta]	uniprot-apis3AUP000005203:tr|A0A088A3Y7|A0A088A3Y7_APIME Uncharacterized protein OS=Apis mellifera GN=SCR-B2 PE=4 SV=1	uniprot-cflo3AUP000000311:tr|E1ZWV9|E1ZWV9_CAMFO Scavenger receptor class B member 1 (Fragment) OS=Camponotus floridanus GN=EAG_08562 PE=4 SV=1	uniprot-sinv3AUP000006539:tr|E9I899|E9I899_SOLIN Putative uncharacterized protein (Fragment) OS=Solenopsis invicta GN=SINV_14716 PE=4 SV=1
OMA09407	Amelprot:gi|571565279|ref|XP_006566915.1| PREDICTED: blood vessel epicardial substance-like isoform X2 [Apis mellifera]	Cfelprot80:comp65088_c0_seq1_2642_2764	Cfloprot:gi|752861371|ref|XP_011257106.1| PREDICTED: blood vessel epicardial substance-like [Camponotus floridanus]	Sinvprot:gi|751198707|ref|XP_011162049.1| PREDICTED: blood vessel epicardial substance-like [Solenopsis invicta]	uniprot-apis3AUP000005203:tr|A0A088AKF2|A0A088AKF2_APIME Uncharacterized protein OS=Apis mellifera GN=LOC726152 PE=4 SV=1	uniprot-cflo3AUP000000311:tr|E1ZWW9|E1ZWW9_CAMFO Popeye domain-containing protein 2 OS=Camponotus floridanus GN=EAG_08572 PE=4 SV=1	uniprot-sinv3AUP000006539:tr|E9I8A5|E9I8A5_SOLIN Putative uncharacterized protein (Fragment) OS=Solenopsis invicta GN=SINV_14253 PE=4 SV=1
OMA16591	Amelprot:gi|571543990|ref|XP_006563826.1| PREDICTED: INO80 complex subunit E-like [Apis mellifera]	Cfelprot80:comp59582_c0_seq1_763_994	Cfloprot:gi|752861377|ref|XP_011257138.1| PREDICTED: uncharacterized protein LOC105251807 [Camponotus floridanus]	Sinvprot:gi|751198715|ref|XP_011162428.1| PREDICTED: uncharacterized protein LOC105197580 [Solenopsis invicta]	uniprot-apis3AUP000005203:tr|A0A087ZY85|A0A087ZY85_APIME Uncharacterized protein OS=Apis mellifera GN=LOC409994 PE=4 SV=1	uniprot-cflo3AUP000000311:tr|E1ZWX2|E1ZWX2_CAMFO Coiled-coil domain-containing protein 95 OS=Camponotus floridanus GN=EAG_08575 PE=4 SV=1	uniprot-sinv3AUP000006539:tr|E9I8A6|E9I8A6_SOLIN Putative uncharacterized protein (Fragment) OS=Solenopsis invicta GN=SINV_04933 PE=4 SV=1
OMA12279	Amelprot:gi|66514467|ref|XP_394753.2| PREDICTED: GTP-binding protein 128up-like isoform 1 [Apis mellifera]	Cfelprot80:comp46714_c0_seq1_165_1253	Cfloprot:gi|752861425|ref|XP_011257360.1| PREDICTED: GTP-binding protein 128up [Camponotus floridanus]	Sinvprot:gi|751198733|ref|XP_011163228.1| PREDICTED: GTP-binding protein 128up [Solenopsis invicta]	uniprot-apis3AUP000005203:tr|A0A087ZSV5|A0A087ZSV5_APIME Uncharacterized protein OS=Apis mellifera GN=LOC411280 PE=4 SV=1	uniprot-cflo3AUP000000311:tr|E1ZWX8|E1ZWX8_CAMFO GTP-binding protein 128up OS=Camponotus floridanus GN=EAG_08581 PE=4 SV=1	uniprot-sinv3AUP000006539:tr|E9I8B0|E9I8B0_SOLIN Putative uncharacterized protein (Fragment) OS=Solenopsis invicta GN=SINV_08023 PE=4 SV=1
OMA14056	Amelprot:gi|66514502|ref|XP_624085.1| PREDICTED: protein phosphatase PTC7 homolog [Apis mellifera]	Cfelprot80:comp67338_c0_seq1_334_1225	Cfloprot:gi|752861427|ref|XP_011257375.1| PREDICTED: protein phosphatase PTC7 homolog [Camponotus floridanus]	Sinvprot:gi|751198737|ref|XP_011163442.1| PREDICTED: protein phosphatase PTC7 homolog [Solenopsis invicta]	uniprot-apis3AUP000005203:tr|A0A087ZSV9|A0A087ZSV9_APIME Uncharacterized protein OS=Apis mellifera GN=LOC551694 PE=4 SV=1	uniprot-cflo3AUP000000311:tr|E1ZWX9|E1ZWX9_CAMFO Protein phosphatase PTC7-like protein OS=Camponotus floridanus GN=EAG_08582 PE=4 SV=1	uniprot-sinv3AUP000006539:tr|E9I8B2|E9I8B2_SOLIN Putative uncharacterized protein (Fragment) OS=Solenopsis invicta GN=SINV_03687 PE=4 SV=1
OMA14507	Amelprot:gi|66532731|ref|XP_396720.2| PREDICTED: cytoplasmic phosphatidylinositol transfer protein 1 [Apis mellifera]	Cfelprot80:comp69336_c0_seq1_551_1404	Cfloprot:gi|752861429|ref|XP_011257388.1| PREDICTED: cytoplasmic phosphatidylinositol transfer protein 1 [Camponotus floridanus]	Sinvprot:gi|751198749|ref|XP_011164158.1| PREDICTED: cytoplasmic phosphatidylinositol transfer protein 1 [Solenopsis invicta]	uniprot-apis3AUP000005203:tr|A0A087ZP11|A0A087ZP11_APIME Uncharacterized protein OS=Apis mellifera GN=rdgBbeta PE=4 SV=1	uniprot-cflo3AUP000000311:tr|E1ZWY1|E1ZWY1_CAMFO Cytoplasmic phosphatidylinositol transfer protein 1 OS=Camponotus floridanus GN=EAG_08584 PE=4 SV=1	uniprot-sinv3AUP000006539:tr|E9I8B4|E9I8B4_SOLIN Putative uncharacterized protein (Fragment) OS=Solenopsis invicta GN=SINV_00782 PE=4 SV=1
OMA09206	Amelprot:gi|48106725|ref|XP_393076.1| PREDICTED: Golgi reassembly-stacking protein 2-like [Apis mellifera]	Cfelprot80:comp67256_c0_seq1_154_1416	Cfloprot:gi|752861450|ref|XP_011257493.1| PREDICTED: Golgi reassembly-stacking protein 2 [Camponotus floridanus]	Sinvprot:gi|751198755|ref|XP_011164501.1| PREDICTED: Golgi reassembly-stacking protein 2 [Solenopsis invicta]	uniprot-apis3AUP000005203:tr|A0A088A5B9|A0A088A5B9_APIME Uncharacterized protein OS=Apis mellifera GN=LOC409571 PE=4 SV=1	uniprot-cflo3AUP000000311:tr|E1ZWY5|E1ZWY5_CAMFO Golgi reassembly-stacking protein 2 OS=Camponotus floridanus GN=EAG_08588 PE=4 SV=1	uniprot-sinv3AUP000006539:tr|E9I8B7|E9I8B7_SOLIN Putative uncharacterized protein (Fragment) OS=Solenopsis invicta GN=SINV_12073 PE=4 SV=1
OMA05385	Amelprot:gi|328792067|ref|XP_624833.2| PREDICTED: transmembrane 9 superfamily member 2-like isoformX1 [Apis mellifera]	Cfelprot80:comp45836_c0_seq1_238_1886	Cfloprot:gi|752861458|ref|XP_011257538.1| PREDICTED: LOW QUALITY PROTEIN: transmembrane 9 superfamily member 2 [Camponotus floridanus]	Sinvprot:gi|751198938|ref|XP_011172851.1| PREDICTED: transmembrane 9 superfamily member 2 [Solenopsis invicta]	uniprot-apis3AUP000005203:tr|A0A088A292|A0A088A292_APIME Uncharacterized protein OS=Apis mellifera GN=LOC552455 PE=4 SV=1	uniprot-cflo3AUP000000311:tr|E1ZWY8|E1ZWY8_CAMFO Transmembrane 9 superfamily member 2 OS=Camponotus floridanus GN=EAG_08591 PE=4 SV=1	uniprot-sinv3AUP000006539:tr|E9I8C0|E9I8C0_SOLIN Putative uncharacterized protein (Fragment) OS=Solenopsis invicta GN=SINV_07042 PE=4 SV=1
OMA17755	Amelprot:gi|66504921|ref|XP_394359.2| PREDICTED: charged multivesicular body protein 6-like [Apis mellifera]	Cfelprot80:comp68212_c0_seq1_148_742	Cfloprot:gi|752870545|ref|XP_011252430.1| PREDICTED: charged multivesicular body protein 6 [Camponotus floridanus]	Sinvprot:gi|751198765|ref|XP_011164954.1| PREDICTED: charged multivesicular body protein 6-A [Solenopsis invicta]	uniprot-apis3AUP000005203:tr|A0A088ABW5|A0A088ABW5_APIME Uncharacterized protein OS=Apis mellifera GN=LOC410883 PE=4 SV=1	uniprot-cflo3AUP000000311:tr|E2A6N5|E2A6N5_CAMFO Charged multivesicular body protein 6 OS=Camponotus floridanus GN=EAG_00577 PE=4 SV=1	uniprot-sinv3AUP000006539:tr|E9I8C7|E9I8C7_SOLIN Putative uncharacterized protein (Fragment) OS=Solenopsis invicta GN=SINV_13200 PE=4 SV=1
OMA19190	Amelprot:gi|571512320|ref|XP_006563807.1| PREDICTED: uncharacterized protein LOC100577268 isoform X1 [Apis mellifera]	Cfelprot80:comp46703_c0_seq2_149_657	Cfloprot:gi|752861283|ref|XP_011256635.1| PREDICTED: uncharacterized protein LOC105251478 isoform X1 [Camponotus floridanus]	Sinvprot:gi|751198767|ref|XP_011165061.1| PREDICTED: uncharacterized protein LOC105199569 isoform X1 [Solenopsis invicta]	uniprot-apis3AUP000005203:tr|A0A088ABW6|A0A088ABW6_APIME Uncharacterized protein OS=Apis mellifera GN=LOC100577268 PE=4 SV=1	uniprot-cflo3AUP000000311:tr|E1ZWS4|E1ZWS4_CAMFO Putative uncharacterized protein OS=Camponotus floridanus GN=EAG_03323 PE=4 SV=1	uniprot-sinv3AUP000006539:tr|E9I8C8|E9I8C8_SOLIN Putative uncharacterized protein (Fragment) OS=Solenopsis invicta GN=SINV_10942 PE=4 SV=1
OMA08535	Amelprot:gi|571512353|ref|XP_006564290.1| PREDICTED: membrane-bound transcription factor site-2 protease-like [Apis mellifera]	Cfelprot80:comp55331_c0_seq1_707_1850	Cfloprot:gi|752861268|ref|XP_011256557.1| PREDICTED: membrane-bound transcription factor site-2 protease [Camponotus floridanus]	Sinvprot:gi|751198775|ref|XP_011165425.1| PREDICTED: membrane-bound transcription factor site-2 protease [Solenopsis invicta]	uniprot-apis3AUP000005203:tr|A0A087ZWY1|A0A087ZWY1_APIME Uncharacterized protein OS=Apis mellifera GN=LOC724553 PE=4 SV=1	uniprot-cflo3AUP000000311:tr|E1ZWR7|E1ZWR7_CAMFO Membrane-bound transcription factor site-2 protease OS=Camponotus floridanus GN=EAG_03316 PE=4 SV=1	uniprot-sinv3AUP000006539:tr|E9I8D3|E9I8D3_SOLIN Putative uncharacterized protein (Fragment) OS=Solenopsis invicta GN=SINV_05718 PE=4 SV=1
OMA13568	Amelprot:gi|328784367|ref|XP_397372.4| PREDICTED: 8-oxo-dGDP phosphatase NUDT18-like [Apis mellifera]	Cfelprot80:comp43744_c0_seq1_247_1214	Cfloprot:gi|752892980|ref|XP_011264603.1| PREDICTED: 8-oxo-dGDP phosphatase NUDT18 [Camponotus floridanus]	Sinvprot:gi|751198773|ref|XP_011165309.1| PREDICTED: 8-oxo-dGDP phosphatase NUDT18 [Solenopsis invicta]	uniprot-apis3AUP000005203:tr|A0A087ZWY9|A0A087ZWY9_APIME Uncharacterized protein OS=Apis mellifera GN=LOC413933 PE=3 SV=1	uniprot-cflo3AUP000000311:tr|E2AVB6|E2AVB6_CAMFO Nucleoside diphosphate-linked moiety X motif 18 OS=Camponotus floridanus GN=EAG_08632 PE=3 SV=1	uniprot-sinv3AUP000006539:tr|E9I8D4|E9I8D4_SOLIN Putative uncharacterized protein (Fragment) OS=Solenopsis invicta GN=SINV_04969 PE=3 SV=1
OMA00194	Amelprot:gi|571516901|ref|XP_006558458.1| PREDICTED: spectrin alpha chain-like [Apis mellifera]	Cfelprot80:comp44860_c0_seq1_68_5848	Cfloprot:gi|752894847|ref|XP_011265618.1| PREDICTED: spectrin alpha chain [Camponotus floridanus]	Sinvprot:gi|751198785|ref|XP_011165967.1| PREDICTED: spectrin alpha chain [Solenopsis invicta]	uniprot-apis3AUP000005203:tr|A0A088ACE3|A0A088ACE3_APIME Uncharacterized protein OS=Apis mellifera GN=LOC551291 PE=4 SV=1	uniprot-cflo3AUP000000311:tr|E2AX44|E2AX44_CAMFO Spectrin alpha chain OS=Camponotus floridanus GN=EAG_01747 PE=4 SV=1	uniprot-sinv3AUP000006539:tr|E9I8D6|E9I8D6_SOLIN Putative uncharacterized protein (Fragment) OS=Solenopsis invicta GN=SINV_80128 PE=4 SV=1
OMA20393	Amelprot:gi|328777210|ref|XP_001120820.2| PREDICTED: anaphase-promoting complex subunit 15-like [Apis mellifera]	Cfelprot80:comp33678_c0_seq1_852_1043	Cfloprot:gi|752894830|ref|XP_011265609.1| PREDICTED: anaphase-promoting complex subunit 15-like [Camponotus floridanus]	Sinvprot:gi|751198789|ref|XP_011166184.1| PREDICTED: anaphase-promoting complex subunit 15-like [Solenopsis invicta]	uniprot-apis3AUP000005203:tr|A0A088ACD9|A0A088ACD9_APIME Uncharacterized protein OS=Apis mellifera GN=LOC724920 PE=4 SV=1	uniprot-cflo3AUP000000311:tr|E2AX39|E2AX39_CAMFO Putative uncharacterized protein OS=Camponotus floridanus GN=EAG_01742 PE=4 SV=1	uniprot-sinv3AUP000006539:tr|E9I8E0|E9I8E0_SOLIN Putative uncharacterized protein (Fragment) OS=Solenopsis invicta GN=SINV_05512 PE=4 SV=1
OMA16190	Amelprot:gi|571516852|ref|XP_006558450.1| PREDICTED: high affinity copper uptake protein 1-like isoform X4 [Apis mellifera]	Cfelprot80:comp46100_c0_seq1_525_969	Cfloprot:gi|752893610|ref|XP_011264952.1| PREDICTED: high affinity copper uptake protein 1 isoform X1 [Camponotus floridanus]	Sinvprot:gi|751198791|ref|XP_011166417.1| PREDICTED: high affinity copper uptake protein 1 isoform X1 [Solenopsis invicta]	uniprot-apis3AUP000005203:tr|A0A088ACD2|A0A088ACD2_APIME Uncharacterized protein OS=Apis mellifera GN=LOC551217 PE=4 SV=1	uniprot-cflo3AUP000000311:tr|E2AVX5|E2AVX5_CAMFO High affinity copper uptake protein 1 OS=Camponotus floridanus GN=EAG_01587 PE=4 SV=1	uniprot-sinv3AUP000006539:tr|E9I8E1|E9I8E1_SOLIN Putative uncharacterized protein (Fragment) OS=Solenopsis invicta GN=SINV_06670 PE=4 SV=1
OMA04327	Amelprot:gi|328789173|ref|XP_624144.2| PREDICTED: phosphorylated CTD-interacting factor 1-like [Apis mellifera]	Cfelprot80:comp29161_c0_seq1_90_2335	Cfloprot:gi|752873426|ref|XP_011253992.1| PREDICTED: phosphorylated CTD-interacting factor 1 [Camponotus floridanus]	Sinvprot:gi|751198804|ref|XP_011167024.1| PREDICTED: phosphorylated CTD-interacting factor 1 [Solenopsis invicta]	uniprot-apis3AUP000005203:tr|A0A087ZT31|A0A087ZT31_APIME Uncharacterized protein OS=Apis mellifera GN=LOC551754 PE=4 SV=1	uniprot-cflo3AUP000000311:tr|E2A9L9|E2A9L9_CAMFO Phosphorylated CTD-interacting factor 1 OS=Camponotus floridanus GN=EAG_11439 PE=4 SV=1	uniprot-sinv3AUP000006539:tr|E9I8E3|E9I8E3_SOLIN Putative uncharacterized protein (Fragment) OS=Solenopsis invicta GN=SINV_04150 PE=4 SV=1
OMA10187	Amelprot:gi|328789207|ref|XP_395655.4| PREDICTED: jmjC domain-containing protein 4-like isoform 1 [Apis mellifera]	Cfelprot80:comp56239_c0_seq1_268_1466	Cfloprot:gi|752873422|ref|XP_011253990.1| PREDICTED: jmjC domain-containing protein 4 isoform X1 [Camponotus floridanus]	Sinvprot:gi|751198806|ref|XP_011167124.1| PREDICTED: jmjC domain-containing protein 4 [Solenopsis invicta]	uniprot-apis3AUP000005203:tr|A0A087ZT37|A0A087ZT37_APIME Uncharacterized protein OS=Apis mellifera GN=LOC412192 PE=4 SV=1	uniprot-cflo3AUP000000311:tr|E2A9L8|E2A9L8_CAMFO JmjC domain-containing protein 4 OS=Camponotus floridanus GN=EAG_11438 PE=4 SV=1	uniprot-sinv3AUP000006539:tr|E9I8E4|E9I8E4_SOLIN Putative uncharacterized protein (Fragment) OS=Solenopsis invicta GN=SINV_05930 PE=4 SV=1
OMA12301	Amelprot:gi|66500960|ref|XP_395396.2| PREDICTED: monoacylglycerol lipase ABHD12-like isoform X2 [Apis mellifera]	Cfelprot80:comp60216_c0_seq1_710_1552	Cfloprot:gi|752871376|ref|XP_011252884.1| PREDICTED: LOW QUALITY PROTEIN: monoacylglycerol lipase ABHD12 [Camponotus floridanus]	Sinvprot:gi|751198808|ref|XP_011167237.1| PREDICTED: monoacylglycerol lipase ABHD12 isoform X1 [Solenopsis invicta]	uniprot-apis3AUP000005203:tr|A0A088AJ98|A0A088AJ98_APIME Uncharacterized protein OS=Apis mellifera GN=LOC411927 PE=4 SV=1	uniprot-cflo3AUP000000311:tr|E2A7B9|E2A7B9_CAMFO Abhydrolase domain-containing protein 12 (Fragment) OS=Camponotus floridanus GN=EAG_03805 PE=4 SV=1	uniprot-sinv3AUP000006539:tr|E9I8E5|E9I8E5_SOLIN Putative uncharacterized protein (Fragment) OS=Solenopsis invicta GN=SINV_00212 PE=4 SV=1
OMA06209	Amelprot:gi|571506577|ref|XP_006570857.1| PREDICTED: putative glycerol kinase 3-like isoform X6 [Apis mellifera]	Cfelprot80:comp60666_c0_seq2_511_2249	Cfloprot:gi|752871268|ref|XP_011252827.1| PREDICTED: glycerol kinase [Camponotus floridanus]	Sinvprot:gi|751198830|ref|XP_011168086.1| PREDICTED: glycerol kinase [Solenopsis invicta]	uniprot-apis3AUP000005203:tr|A0A088A7T5|A0A088A7T5_APIME Uncharacterized protein OS=Apis mellifera GN=LOC409261 PE=3 SV=1	uniprot-cflo3AUP000000311:tr|E2A7C0|E2A7C0_CAMFO Putative glycerol kinase 3 OS=Camponotus floridanus GN=EAG_03806 PE=3 SV=1	uniprot-sinv3AUP000006539:tr|E9I8E6|E9I8E6_SOLIN Putative uncharacterized protein (Fragment) OS=Solenopsis invicta GN=SINV_04309 PE=3 SV=1
OMA13767	Amelprot:gi|328791571|ref|XP_624095.2| PREDICTED: clavesin-2-like isoform 1 [Apis mellifera]	Cfelprot80:comp31925_c0_seq1_246_1098	Cfloprot:gi|752884367|ref|XP_011259922.1| PREDICTED: clavesin-1 [Camponotus floridanus]	Sinvprot:gi|751198898|ref|XP_011170939.1| PREDICTED: clavesin-1 [Solenopsis invicta]	uniprot-apis3AUP000005203:tr|A0A088AU83|A0A088AU83_APIME Uncharacterized protein OS=Apis mellifera GN=LOC551703 PE=4 SV=1	uniprot-cflo3AUP000000311:tr|E2AKP8|E2AKP8_CAMFO Retinaldehyde-binding protein 1-like protein 1 OS=Camponotus floridanus GN=EAG_03122 PE=4 SV=1	uniprot-sinv3AUP000006539:tr|E9I8F2|E9I8F2_SOLIN Putative uncharacterized protein (Fragment) OS=Solenopsis invicta GN=SINV_08298 PE=4 SV=1
OMA05453	Amelprot:gi|571578115|ref|XP_006572285.1| PREDICTED: phospholipase D3-like isoform X6 [Apis mellifera]	Cfelprot80:comp61885_c0_seq1_348_2137	Cfloprot:gi|752884387|ref|XP_011259933.1| PREDICTED: phospholipase D3-like [Camponotus floridanus]	Sinvprot:gi|751198882|ref|XP_011170291.1| PREDICTED: phospholipase D3-like [Solenopsis invicta]	uniprot-apis3AUP000005203:tr|A0A088AGL5|A0A088AGL5_APIME Uncharacterized protein OS=Apis mellifera GN=LOC411715 PE=4 SV=1	uniprot-cflo3AUP000000311:tr|E2AKQ2|E2AKQ2_CAMFO Phospholipase D3 OS=Camponotus floridanus GN=EAG_03126 PE=4 SV=1	uniprot-sinv3AUP000006539:tr|E9I8G1|E9I8G1_SOLIN Putative uncharacterized protein (Fragment) OS=Solenopsis invicta GN=SINV_01774 PE=4 SV=1
OMA07493	Amelprot:gi|300116409|ref|NP_001177849.1| uncharacterized protein LOC411983 [Apis mellifera]	Cfelprot80:comp62555_c0_seq1_307_1926	Cfloprot:gi|752884397|ref|XP_011259939.1| PREDICTED: putative fatty acyl-CoA reductase CG5065 [Camponotus floridanus]	Sinvprot:gi|751198880|ref|XP_011170208.1| PREDICTED: putative fatty acyl-CoA reductase CG5065 [Solenopsis invicta]	uniprot-apis3AUP000005203:tr|D9MX52|D9MX52_APIME Putative fatty acyl-CoA reductase OS=Apis mellifera GN=LOC411983 PE=2 SV=1	uniprot-cflo3AUP000000311:tr|E2AKQ3|E2AKQ3_CAMFO Fatty acyl-CoA reductase 1 OS=Camponotus floridanus GN=EAG_03127 PE=4 SV=1	uniprot-sinv3AUP000006539:tr|E9I8G2|E9I8G2_SOLIN Putative uncharacterized protein (Fragment) OS=Solenopsis invicta GN=SINV_00151 PE=4 SV=1
OMA02687	Amelprot:gi|66523254|ref|XP_392044.2| PREDICTED: serine/threonine-protein kinase/endoribonuclease IRE1 isoform X3 [Apis mellifera]	Cfelprot80:comp68299_c0_seq1_523_3122	Cfloprot:gi|752875596|ref|XP_011255157.1| PREDICTED: serine/threonine-protein kinase/endoribonuclease IRE1 isoform X1 [Camponotus floridanus]	Sinvprot:gi|751198962|ref|XP_011174123.1| PREDICTED: serine/threonine-protein kinase/endoribonuclease IRE1 [Solenopsis invicta]	uniprot-apis3AUP000005203:tr|A0A087ZS85|A0A087ZS85_APIME Uncharacterized protein OS=Apis mellifera GN=ire-1 PE=4 SV=1	uniprot-cflo3AUP000000311:tr|E2ABW3|E2ABW3_CAMFO Serine/threonine-protein kinase/endoribonuclease ire-1 (Fragment) OS=Camponotus floridanus GN=EAG_02821 PE=4 SV=1	uniprot-sinv3AUP000006539:tr|E9I8H9|E9I8H9_SOLIN Putative uncharacterized protein (Fragment) OS=Solenopsis invicta GN=SINV_07475 PE=4 SV=1
OMA00385	Amelprot:gi|571538377|ref|XP_006560194.1| PREDICTED: lysine-specific demethylase 3B-like isoform X2 [Apis mellifera]	Cfelprot80:comp62519_c0_seq1_1_5874	Cfloprot:gi|752893191|ref|XP_011264723.1| PREDICTED: lysine-specific demethylase 3B isoform X5 [Camponotus floridanus]	Sinvprot:gi|751198984|ref|XP_011175105.1| PREDICTED: lysine-specific demethylase 3B-like isoform X2 [Solenopsis invicta]	uniprot-apis3AUP000005203:tr|A0A088AQ70|A0A088AQ70_APIME Uncharacterized protein OS=Apis mellifera GN=LOC408944 PE=4 SV=1	uniprot-cflo3AUP000000311:tr|E2AVL8|E2AVL8_CAMFO JmjC domain-containing histone demethylation protein 2B OS=Camponotus floridanus GN=EAG_13849 PE=4 SV=1	uniprot-sinv3AUP000006539:tr|E9I8J3|E9I8J3_SOLIN Putative uncharacterized protein (Fragment) OS=Solenopsis invicta GN=SINV_04362 PE=4 SV=1
OMA05592	Amelprot:gi|110758020|ref|XP_394701.3| PREDICTED: tyrosine-protein phosphatase non-receptor type 9-like isoform 1 [Apis mellifera]	Cfelprot80:comp59932_c0_seq2_279_2167	Cfloprot:gi|752893193|ref|XP_011264724.1| PREDICTED: tyrosine-protein phosphatase non-receptor type 9 [Camponotus floridanus]	Sinvprot:gi|751198988|ref|XP_011175125.1| PREDICTED: tyrosine-protein phosphatase non-receptor type 9 [Solenopsis invicta]	uniprot-apis3AUP000005203:tr|A0A088AQ71|A0A088AQ71_APIME Protein-tyrosine-phosphatase OS=Apis mellifera GN=LOC411227 PE=4 SV=1	uniprot-cflo3AUP000000311:tr|E2AVI4|E2AVI4_CAMFO Protein-tyrosine-phosphatase OS=Camponotus floridanus GN=EAG_13850 PE=4 SV=1	uniprot-sinv3AUP000006539:tr|E9I8J5|E9I8J5_SOLIN Putative uncharacterized protein (Fragment) OS=Solenopsis invicta GN=SINV_02788 PE=4 SV=1
OMA05546	Amelprot:gi|571522164|ref|XP_623316.3| PREDICTED: cell division cycle protein 16 homolog isoform X2 [Apis mellifera]	Cfelprot80:comp54400_c0_seq1_441_2332	Cfloprot:gi|752893195|ref|XP_011264725.1| PREDICTED: cell division cycle protein 16 homolog [Camponotus floridanus]	Sinvprot:gi|751198990|ref|XP_011175137.1| PREDICTED: cell division cycle protein 16 homolog [Solenopsis invicta]	uniprot-apis3AUP000005203:tr|A0A088ANG0|A0A088ANG0_APIME Uncharacterized protein OS=Apis mellifera GN=LOC550920 PE=4 SV=1	uniprot-cflo3AUP000000311:tr|E2AVI5|E2AVI5_CAMFO Cell division cycle protein 16-like protein OS=Camponotus floridanus GN=EAG_13851 PE=4 SV=1	uniprot-sinv3AUP000006539:tr|E9I8J9|E9I8J9_SOLIN Putative uncharacterized protein (Fragment) OS=Solenopsis invicta GN=SINV_09657 PE=4 SV=1
OMA08935	Amelprot:gi|328780124|ref|XP_394700.4| PREDICTED: tubulin epsilon chain [Apis mellifera]	Cfelprot80:comp65597_c0_seq1_340_1361	Cfloprot:gi|752893213|ref|XP_011264735.1| PREDICTED: tubulin epsilon chain-like isoform X1 [Camponotus floridanus]	Sinvprot:gi|751198998|ref|XP_011175179.1| PREDICTED: tubulin epsilon chain-like [Solenopsis invicta]	uniprot-apis3AUP000005203:tr|A0A088ACR2|A0A088ACR2_APIME Uncharacterized protein OS=Apis mellifera GN=orb2 PE=3 SV=1	uniprot-cflo3AUP000000311:tr|E2AVJ3|E2AVJ3_CAMFO Tubulin epsilon chain OS=Camponotus floridanus GN=EAG_13859 PE=3 SV=1	uniprot-sinv3AUP000006539:tr|E9I8K3|E9I8K3_SOLIN Putative uncharacterized protein (Fragment) OS=Solenopsis invicta GN=SINV_00350 PE=3 SV=1
OMA12612	Amelprot:gi|66519588|ref|XP_625093.1| PREDICTED: U5 small nuclear ribonucleoprotein 40 kDa protein-like isoform X2 [Apis mellifera]	Cfelprot80:comp58479_c0_seq1_130_1105	Cfloprot:gi|752883103|ref|XP_011259238.1| PREDICTED: U5 small nuclear ribonucleoprotein 40 kDa protein [Camponotus floridanus]	Sinvprot:gi|751199050|ref|XP_011175481.1| PREDICTED: U5 small nuclear ribonucleoprotein 40 kDa protein [Solenopsis invicta]	uniprot-apis3AUP000005203:tr|A0A088A190|A0A088A190_APIME Uncharacterized protein OS=Apis mellifera GN=LOC552715 PE=4 SV=1	uniprot-cflo3AUP000000311:tr|E2AJJ7|E2AJJ7_CAMFO WD repeat-containing protein 57 OS=Camponotus floridanus GN=EAG_07750 PE=4 SV=1	uniprot-sinv3AUP000006539:tr|E9I8L8|E9I8L8_SOLIN Putative uncharacterized protein (Fragment) OS=Solenopsis invicta GN=SINV_04082 PE=4 SV=1
OMA13016	Amelprot:gi|571546096|ref|XP_006568325.1| PREDICTED: UPF0160 protein MYG1, mitochondrial-like isoform X1 [Apis mellifera]	Cfelprot80:comp60883_c0_seq1_261_1263	Cfloprot:gi|752862898|ref|XP_011265269.1| PREDICTED: UPF0160 protein MYG1, mitochondrial isoform X2 [Camponotus floridanus]	Sinvprot:gi|751199093|ref|XP_011175710.1| PREDICTED: UPF0160 protein MYG1, mitochondrial [Solenopsis invicta]	uniprot-apis3AUP000005203:tr|A0A088ABQ9|A0A088ABQ9_APIME Uncharacterized protein OS=Apis mellifera GN=LOC551296 PE=4 SV=1	uniprot-cflo3AUP000000311:tr|E1ZYF7|E1ZYF7_CAMFO UPF0160 protein MYG1 OS=Camponotus floridanus GN=EAG_06498 PE=4 SV=1	uniprot-sinv3AUP000006539:tr|E9I8N9|E9I8N9_SOLIN Putative uncharacterized protein (Fragment) OS=Solenopsis invicta GN=SINV_09604 PE=4 SV=1
OMA01994	Amelprot:gi|328781566|ref|XP_623755.3| PREDICTED: integrator complex subunit 2 [Apis mellifera]	Cfelprot80:comp70398_c0_seq1_186_3380	Cfloprot:gi|752895399|ref|XP_011265920.1| PREDICTED: integrator complex subunit 2 isoform X1 [Camponotus floridanus]	Sinvprot:gi|751199147|ref|XP_011176070.1| PREDICTED: integrator complex subunit 2 [Solenopsis invicta]	uniprot-apis3AUP000005203:tr|A0A088AVZ3|A0A088AVZ3_APIME Uncharacterized protein OS=Apis mellifera GN=INTS2 PE=4 SV=1	uniprot-cflo3AUP000000311:tr|E2AXQ5|E2AXQ5_CAMFO Integrator complex subunit 2 OS=Camponotus floridanus GN=EAG_15445 PE=4 SV=1	uniprot-sinv3AUP000006539:tr|E9I8Q0|E9I8Q0_SOLIN Putative uncharacterized protein (Fragment) OS=Solenopsis invicta GN=SINV_80916 PE=4 SV=1
OMA13298	Amelprot:gi|571575235|ref|XP_006563740.1| PREDICTED: trans-1,2-dihydrobenzene-1,2-diol dehydrogenase-like isoform X3 [Apis mellifera]	Cfelprot80:comp66896_c0_seq1_362_1345	Cfloprot:gi|752895397|ref|XP_011265919.1| PREDICTED: trans-1,2-dihydrobenzene-1,2-diol dehydrogenase-like [Camponotus floridanus]	Sinvprot:gi|751199149|ref|XP_011176093.1| PREDICTED: trans-1,2-dihydrobenzene-1,2-diol dehydrogenase-like [Solenopsis invicta]	uniprot-apis3AUP000005203:tr|H9K9P8|H9K9P8_APIME Uncharacterized protein OS=Apis mellifera GN=LOC412231 PE=4 SV=1	uniprot-cflo3AUP000000311:tr|E2AXQ4|E2AXQ4_CAMFO Trans-1,2-dihydrobenzene-1,2-diol dehydrogenase OS=Camponotus floridanus GN=EAG_15444 PE=4 SV=1	uniprot-sinv3AUP000006539:tr|E9I8Q2|E9I8Q2_SOLIN Putative uncharacterized protein (Fragment) OS=Solenopsis invicta GN=SINV_04686 PE=4 SV=1
OMA02287	Amelprot:gi|571542648|ref|XP_006559566.1| PREDICTED: reticulocyte-binding protein PFD0110w isoform X1 [Apis mellifera]	Cfelprot80:comp45800_c0_seq5_281_3355	Cfloprot:gi|752865655|ref|XP_011269283.1| PREDICTED: formin-binding protein 4-like [Camponotus floridanus]	Sinvprot:gi|751199167|ref|XP_011176192.1| PREDICTED: formin-binding protein 4-like [Solenopsis invicta]	uniprot-apis3AUP000005203:tr|A0A087ZNW3|A0A087ZNW3_APIME Uncharacterized protein OS=Apis mellifera GN=LOC409325 PE=4 SV=1	uniprot-cflo3AUP000000311:tr|E2A1A8|E2A1A8_CAMFO Formin-binding protein 4 OS=Camponotus floridanus GN=EAG_05012 PE=4 SV=1	uniprot-sinv3AUP000006539:tr|E9I8Q4|E9I8Q4_SOLIN Putative uncharacterized protein (Fragment) OS=Solenopsis invicta GN=SINV_15277 PE=4 SV=1
OMA10165	Amelprot:gi|328784749|ref|XP_394827.3| PREDICTED: lipase 3-like [Apis mellifera]	Cfelprot80:comp58241_c0_seq1_429_564	Cfloprot:gi|752865657|ref|XP_011269284.1| PREDICTED: lipase 3-like [Camponotus floridanus]	Sinvprot:gi|751199162|ref|XP_011176163.1| PREDICTED: lipase 3-like [Solenopsis invicta]	uniprot-apis3AUP000005203:tr|A0A087ZSH4|A0A087ZSH4_APIME Lipase OS=Apis mellifera GN=LOC411353 PE=3 SV=1	uniprot-cflo3AUP000000311:tr|E2A1A9|E2A1A9_CAMFO Lipase OS=Camponotus floridanus GN=EAG_05013 PE=3 SV=1	uniprot-sinv3AUP000006539:tr|E9I8R3|E9I8R3_SOLIN Putative uncharacterized protein (Fragment) OS=Solenopsis invicta GN=SINV_05870 PE=4 SV=1
OMA03437	Amelprot:gi|571523594|ref|XP_006562689.1| PREDICTED: PHD finger protein rhinoceros-like isoform X1 [Apis mellifera]	Cfelprot80:comp66003_c0_seq1_3793_4245	Cfloprot:gi|752869030|ref|XP_011251613.1| PREDICTED: uncharacterized protein LOC105248496 [Camponotus floridanus]	Sinvprot:gi|751199180|ref|XP_011176260.1| PREDICTED: uncharacterized protein LOC105208164 isoform X2 [Solenopsis invicta]	uniprot-apis3AUP000005203:tr|A0A088AG27|A0A088AG27_APIME Uncharacterized protein OS=Apis mellifera GN=LOC724830 PE=4 SV=1	uniprot-cflo3AUP000000311:tr|E2A4T8|E2A4T8_CAMFO Proton-coupled amino acid transporter 1 OS=Camponotus floridanus GN=EAG_14244 PE=4 SV=1	uniprot-sinv3AUP000006539:tr|E9I8R6|E9I8R6_SOLIN Putative uncharacterized protein (Fragment) OS=Solenopsis invicta GN=SINV_07732 PE=4 SV=1
OMA11058	Amelprot:gi|571523660|ref|XP_006562705.1| PREDICTED: progestin and adipoQ receptor family member 3-like isoform X3 [Apis mellifera]	Cfelprot80:comp61996_c1_seq2_423_1416	Cfloprot:gi|752869035|ref|XP_011251616.1| PREDICTED: progestin and adipoQ receptor family member 3 [Camponotus floridanus]	Sinvprot:gi|751199188|ref|XP_011176295.1| PREDICTED: progestin and adipoQ receptor family member 3 [Solenopsis invicta]	uniprot-apis3AUP000005203:tr|A0A088AG52|A0A088AG52_APIME Uncharacterized protein OS=Apis mellifera GN=LOC408805 PE=4 SV=1	uniprot-cflo3AUP000000311:tr|E2A4U1|E2A4U1_CAMFO Progestin and adipoQ receptor family member 3 OS=Camponotus floridanus GN=EAG_14247 PE=4 SV=1	uniprot-sinv3AUP000006539:tr|E9I8R7|E9I8R7_SOLIN Putative uncharacterized protein (Fragment) OS=Solenopsis invicta GN=SINV_00392 PE=4 SV=1
OMA12365	Amelprot:gi|328787763|ref|XP_003251000.1| PREDICTED: CCAAT/enhancer-binding protein [Apis mellifera]	Cfelprot80:comp59001_c0_seq1_532_1566	Cfloprot:gi|752898096|ref|XP_011267387.1| PREDICTED: CCAAT/enhancer-binding protein [Camponotus floridanus]	Sinvprot:gi|751199194|ref|XP_011176329.1| PREDICTED: CCAAT/enhancer-binding protein [Solenopsis invicta]	uniprot-apis3AUP000005203:tr|A0A087ZZ61|A0A087ZZ61_APIME Uncharacterized protein OS=Apis mellifera GN=slbo PE=4 SV=1	uniprot-cflo3AUP000000311:tr|E2B0S3|E2B0S3_CAMFO CCAAT/enhancer-binding protein OS=Camponotus floridanus GN=EAG_09384 PE=4 SV=1	uniprot-sinv3AUP000006539:tr|E9I8R9|E9I8R9_SOLIN Putative uncharacterized protein (Fragment) OS=Solenopsis invicta GN=SINV_03281 PE=4 SV=1
OMA20765	Amelprot:gi|110756044|ref|XP_001120198.1| PREDICTED: longitudinals lacking protein-like [Apis mellifera]	Cfelprot80:comp65798_c0_seq18_601_922	Cfloprot:gi|752898099|ref|XP_011267388.1| PREDICTED: longitudinals lacking protein-like isoform X1 [Camponotus floridanus]	Sinvprot:gi|751199200|ref|XP_011176361.1| PREDICTED: longitudinals lacking protein-like [Solenopsis invicta]	uniprot-apis3AUP000005203:tr|A0A087ZYN1|A0A087ZYN1_APIME Uncharacterized protein OS=Apis mellifera GN=LOC725311 PE=4 SV=1	uniprot-cflo3AUP000000311:tr|E2B0S2|E2B0S2_CAMFO Longitudinals lacking protein-like OS=Camponotus floridanus GN=EAG_09383 PE=4 SV=1	uniprot-sinv3AUP000006539:tr|E9I8S0|E9I8S0_SOLIN Putative uncharacterized protein (Fragment) OS=Solenopsis invicta GN=SINV_10955 PE=4 SV=1
OMA06139	Amelprot:gi|571525572|ref|XP_006567329.1| PREDICTED: long-chain fatty acid transport protein 4-like [Apis mellifera]	Cfelprot80:comp66853_c0_seq1_468_2080	Cfloprot:gi|752898079|ref|XP_011267378.1| PREDICTED: long-chain fatty acid transport protein 4 [Camponotus floridanus]	Sinvprot:gi|751199214|ref|XP_011155322.1| PREDICTED: long-chain fatty acid transport protein 4 isoform X1 [Solenopsis invicta]	uniprot-apis3AUP000005203:tr|A0A087ZYN5|A0A087ZYN5_APIME Uncharacterized protein OS=Apis mellifera GN=LOC408920 PE=4 SV=1	uniprot-cflo3AUP000000311:tr|E2B0R7|E2B0R7_CAMFO Long-chain fatty acid transport protein 4 OS=Camponotus floridanus GN=EAG_09378 PE=4 SV=1	uniprot-sinv3AUP000006539:tr|E9I8S2|E9I8S2_SOLIN Putative uncharacterized protein (Fragment) OS=Solenopsis invicta GN=SINV_09456 PE=4 SV=1
OMA14288	Amelprot:gi|328782232|ref|XP_003250109.1| PREDICTED: heart- and neural crest derivatives-expressed protein 1-like isoform X1 [Apis mellifera]	Cfelprot80:comp62305_c0_seq2_707_1539	Cfloprot:gi|752879403|ref|XP_011257227.1| PREDICTED: heart- and neural crest derivatives-expressed protein 1-like [Camponotus floridanus]	Sinvprot:gi|751199244|ref|XP_011155476.1| PREDICTED: heart- and neural crest derivatives-expressed protein 2 [Solenopsis invicta]	uniprot-apis3AUP000005203:tr|A0A088A452|A0A088A452_APIME Uncharacterized protein OS=Apis mellifera GN=LOC100576222 PE=4 SV=1	uniprot-cflo3AUP000000311:tr|E2AFK8|E2AFK8_CAMFO Heart-and neural crest derivatives-expressed protein 2 OS=Camponotus floridanus GN=EAG_02706 PE=4 SV=1	uniprot-sinv3AUP000006539:tr|E9I8T6|E9I8T6_SOLIN Putative uncharacterized protein (Fragment) OS=Solenopsis invicta GN=SINV_10287 PE=4 SV=1
OMA12073	Amelprot:gi|571503972|ref|XP_006568687.1| PREDICTED: putative E3 ubiquitin-protein ligase UBR7-like isoform X2 [Apis mellifera]	Cfelprot80:comp57452_c0_seq1_554_1424	Cfloprot:gi|752894579|ref|XP_011265473.1| PREDICTED: putative E3 ubiquitin-protein ligase UBR7 [Camponotus floridanus]	Sinvprot:gi|751199250|ref|XP_011155517.1| PREDICTED: putative E3 ubiquitin-protein ligase UBR7 [Solenopsis invicta]	uniprot-apis3AUP000005203:tr|A0A088A3H2|A0A088A3H2_APIME Uncharacterized protein OS=Apis mellifera GN=LOC410726 PE=4 SV=1	uniprot-cflo3AUP000000311:tr|E2AWX9|E2AWX9_CAMFO Putative E3 ubiquitin-protein ligase UBR7 OS=Camponotus floridanus GN=EAG_04233 PE=4 SV=1	uniprot-sinv3AUP000006539:tr|E9I8U1|E9I8U1_SOLIN Putative uncharacterized protein (Fragment) OS=Solenopsis invicta GN=SINV_15108 PE=4 SV=1
OMA06370	Amelprot:gi|66540209|ref|XP_624722.1| PREDICTED: electron transfer flavoprotein-ubiquinone oxidoreductase, mitochondrial isoformX1 [Apis mellifera]	Cfelprot80:comp56358_c0_seq1_106_1919	Cfloprot:gi|752868143|ref|XP_011251133.1| PREDICTED: electron transfer flavoprotein-ubiquinone oxidoreductase, mitochondrial [Camponotus floridanus]	Sinvprot:gi|751199258|ref|XP_011155568.1| PREDICTED: electron transfer flavoprotein-ubiquinone oxidoreductase, mitochondrial [Solenopsis invicta]	uniprot-apis3AUP000005203:tr|A0A0B4J2M5|A0A0B4J2M5_APIME Uncharacterized protein OS=Apis mellifera GN=Etfdh PE=4 SV=1	uniprot-cflo3AUP000000311:tr|E2A3X9|E2A3X9_CAMFO Electron transfer flavoprotein-ubiquinone oxidoreductase, mitochondrial OS=Camponotus floridanus GN=EAG_13656 PE=4 SV=1	uniprot-sinv3AUP000006539:tr|E9I8U4|E9I8U4_SOLIN Putative uncharacterized protein (Fragment) OS=Solenopsis invicta GN=SINV_12757 PE=4 SV=1
OMA20036	Amelprot:gi|571577605|ref|XP_006572121.1| PREDICTED: uncharacterized protein LOC726292 isoform X1 [Apis mellifera]	Cfelprot80:comp57257_c0_seq1_319_744	Cfloprot:gi|752891488|ref|XP_011263785.1| PREDICTED: uncharacterized protein LOC105255934 [Camponotus floridanus]	Sinvprot:gi|751199302|ref|XP_011155828.1| PREDICTED: uncharacterized protein LOC105193166 [Solenopsis invicta]	uniprot-apis3AUP000005203:tr|A0A088AA70|A0A088AA70_APIME Uncharacterized protein OS=Apis mellifera GN=LOC726292 PE=4 SV=1	uniprot-cflo3AUP000000311:tr|E2ATR5|E2ATR5_CAMFO Putative uncharacterized protein OS=Camponotus floridanus GN=EAG_12887 PE=4 SV=1	uniprot-sinv3AUP000006539:tr|E9I8W6|E9I8W6_SOLIN Putative uncharacterized protein (Fragment) OS=Solenopsis invicta GN=SINV_08095 PE=4 SV=1
OMA12794	Amelprot:gi|328788137|ref|XP_394765.2| PREDICTED: leucine-rich repeat-containing protein 58-like [Apis mellifera]	Cfelprot80:comp65533_c0_seq4_311_1346	Cfloprot:gi|752871785|ref|XP_011253105.1| PREDICTED: leucine-rich repeat-containing protein 58 isoform X2 [Camponotus floridanus]	Sinvprot:gi|751199320|ref|XP_011155922.1| PREDICTED: leucine-rich repeat-containing protein 58 isoform X2 [Solenopsis invicta]	uniprot-apis3AUP000005203:tr|A0A088AP30|A0A088AP30_APIME Uncharacterized protein OS=Apis mellifera GN=LOC411291 PE=4 SV=1	uniprot-cflo3AUP000000311:tr|E2A7W2|E2A7W2_CAMFO Leucine-rich repeat-containing protein 58 OS=Camponotus floridanus GN=EAG_03882 PE=4 SV=1	uniprot-sinv3AUP000006539:tr|E9I8X1|E9I8X1_SOLIN Putative uncharacterized protein (Fragment) OS=Solenopsis invicta GN=SINV_03581 PE=4 SV=1
OMA07053	Amelprot:gi|571550165|ref|XP_006567430.1| PREDICTED: kinesin light chain-like isoform X3 [Apis mellifera]	Cfelprot80:comp61295_c0_seq5_581_2277	Cfloprot:gi|752895833|ref|XP_011266155.1| PREDICTED: kinesin light chain isoform X2 [Camponotus floridanus]	Sinvprot:gi|751199330|ref|XP_011155966.1| PREDICTED: kinesin light chain isoform X3 [Solenopsis invicta]	uniprot-apis3AUP000005203:tr|A0A088AP22|A0A088AP22_APIME Uncharacterized protein OS=Apis mellifera GN=LOC726991 PE=4 SV=1	uniprot-cflo3AUP000000311:tr|E2AY94|E2AY94_CAMFO Kinesin light chain OS=Camponotus floridanus GN=EAG_00692 PE=4 SV=1	uniprot-sinv3AUP000006539:tr|E9I8X3|E9I8X3_SOLIN Putative uncharacterized protein (Fragment) OS=Solenopsis invicta GN=SINV_12960 PE=4 SV=1
OMA06905	Amelprot:gi|328792129|ref|XP_397001.3| PREDICTED: transcription factor SPT20 homolog isoform X2 [Apis mellifera]	Cfelprot80:comp64265_c0_seq1_251_1830	Cfloprot:gi|752895097|ref|XP_011265753.1| PREDICTED: histone-lysine N-methyltransferase trithorax isoform X1 [Camponotus floridanus]	Sinvprot:gi|751199338|ref|XP_011156009.1| PREDICTED: probable basic-leucine zipper transcription factor Q isoform X1 [Solenopsis invicta]	uniprot-apis3AUP000005203:tr|A0A088AE51|A0A088AE51_APIME Uncharacterized protein OS=Apis mellifera GN=mtg PE=4 SV=1	uniprot-cflo3AUP000000311:tr|E2AXH3|E2AXH3_CAMFO Putative uncharacterized protein OS=Camponotus floridanus GN=EAG_13447 PE=4 SV=1	uniprot-sinv3AUP000006539:tr|E9I8X8|E9I8X8_SOLIN Putative uncharacterized protein (Fragment) OS=Solenopsis invicta GN=SINV_11280 PE=4 SV=1
OMA11742	Amelprot:gi|328792131|ref|XP_001120030.2| PREDICTED: prostaglandin E2 receptor EP4 subtype-like isoform X1 [Apis mellifera]	Cfelprot80:comp56151_c0_seq1_508_1680	Cfloprot:gi|752869381|ref|XP_011251802.1| PREDICTED: prostaglandin E2 receptor EP3 subtype isoform X1 [Camponotus floridanus]	Sinvprot:gi|751199398|ref|XP_011156359.1| PREDICTED: prostaglandin E2 receptor EP3 subtype [Solenopsis invicta]	uniprot-apis3AUP000005203:tr|A0A088AE45|A0A088AE45_APIME Uncharacterized protein OS=Apis mellifera GN=LOC724237 PE=3 SV=1	uniprot-cflo3AUP000000311:tr|E2A564|E2A564_CAMFO Prostaglandin E2 receptor EP4 subtype OS=Camponotus floridanus GN=EAG_14774 PE=3 SV=1	uniprot-sinv3AUP000006539:tr|E9I8X9|E9I8X9_SOLIN Putative uncharacterized protein (Fragment) OS=Solenopsis invicta GN=SINV_00672 PE=3 SV=1
OMA14649	Amelprot:gi|66547599|ref|XP_623499.1| PREDICTED: selection and upkeep of intraepithelial T-cells protein 2-like [Apis mellifera]	Cfelprot80:comp59830_c0_seq2_192_1001	Cfloprot:gi|752874208|ref|XP_011254415.1| PREDICTED: uncharacterized protein LOC105250151 [Camponotus floridanus]	Sinvprot:gi|751199412|ref|XP_011156439.1| PREDICTED: uncharacterized protein LOC105193607 [Solenopsis invicta]	uniprot-apis3AUP000005203:tr|A0A088A267|A0A088A267_APIME Uncharacterized protein OS=Apis mellifera GN=LOC551098 PE=4 SV=1	uniprot-cflo3AUP000000311:tr|E2AAD5|E2AAD5_CAMFO Putative uncharacterized protein OS=Camponotus floridanus GN=EAG_15836 PE=4 SV=1	uniprot-sinv3AUP000006539:tr|E9I8Y9|E9I8Y9_SOLIN Putative uncharacterized protein (Fragment) OS=Solenopsis invicta GN=SINV_03541 PE=4 SV=1
OMA03767	Amelprot:gi|66547591|ref|XP_623283.1| PREDICTED: vacuolar protein sorting-associated protein 53 homolog [Apis mellifera]	Cfelprot80:comp32805_c0_seq1_1_215	Cfloprot:gi|752874210|ref|XP_011254416.1| PREDICTED: vacuolar protein sorting-associated protein 53 homolog [Camponotus floridanus]	Sinvprot:gi|751199414|ref|XP_011156446.1| PREDICTED: vacuolar protein sorting-associated protein 53 homolog [Solenopsis invicta]	uniprot-apis3AUP000005203:tr|A0A088A2I1|A0A088A2I1_APIME Uncharacterized protein OS=Apis mellifera GN=LOC550700 PE=4 SV=1	uniprot-cflo3AUP000000311:tr|E2AAD6|E2AAD6_CAMFO Vacuolar protein sorting-associated protein 53-like protein OS=Camponotus floridanus GN=EAG_15837 PE=4 SV=1	uniprot-sinv3AUP000006539:tr|E9I8Z0|E9I8Z0_SOLIN Putative uncharacterized protein (Fragment) OS=Solenopsis invicta GN=SINV_08119 PE=4 SV=1
OMA15696	Amelprot:gi|48105889|ref|XP_393034.1| PREDICTED: 60S ribosomal protein L7a [Apis mellifera]	Cfelprot80:comp66631_c0_seq1_151_960	Cfloprot:gi|752874212|ref|XP_011254417.1| PREDICTED: 60S ribosomal protein L7a [Camponotus floridanus]	Sinvprot:gi|751199416|ref|XP_011156456.1| PREDICTED: 60S ribosomal protein L7a [Solenopsis invicta]	uniprot-apis3AUP000005203:tr|A0A088A266|A0A088A266_APIME Uncharacterized protein OS=Apis mellifera GN=LOC727506 PE=4 SV=1	uniprot-cflo3AUP000000311:tr|E2AAD7|E2AAD7_CAMFO 60S ribosomal protein L7a OS=Camponotus floridanus GN=EAG_15838 PE=4 SV=1	uniprot-sinv3AUP000006539:tr|E9I8Z1|E9I8Z1_SOLIN Putative uncharacterized protein (Fragment) OS=Solenopsis invicta GN=SINV_04293 PE=4 SV=1
OMA12458	Amelprot:gi|328780741|ref|XP_003249852.1| PREDICTED: NADH dehydrogenase [ubiquinone] 1 alpha subcomplex assembly factor 5-like isoform 1 [Apis mellifera]	Cfelprot80:comp55889_c0_seq2_1713_1796	Cfloprot:gi|752874214|ref|XP_011254418.1| PREDICTED: NADH dehydrogenase [ubiquinone] 1 alpha subcomplex assembly factor 5 [Camponotus floridanus]	Sinvprot:gi|751199422|ref|XP_011156484.1| PREDICTED: NADH dehydrogenase [ubiquinone] 1 alpha subcomplex assembly factor 5 [Solenopsis invicta]	uniprot-apis3AUP000005203:tr|A0A088A895|A0A088A895_APIME Uncharacterized protein OS=Apis mellifera GN=LOC100576544 PE=4 SV=1	uniprot-cflo3AUP000000311:tr|E2AAD8|E2AAD8_CAMFO Probable methyltransferase C20orf7-like protein OS=Camponotus floridanus GN=EAG_15839 PE=4 SV=1	uniprot-sinv3AUP000006539:tr|E9I8Z2|E9I8Z2_SOLIN Putative uncharacterized protein (Fragment) OS=Solenopsis invicta GN=SINV_04491 PE=4 SV=1
OMA16939	Amelprot:gi|571564329|ref|XP_006562314.1| PREDICTED: metalloproteinase inhibitor 3-like isoform X3 [Apis mellifera]	Cfelprot80:comp62037_c0_seq2_1_819	Cfloprot:gi|752884403|ref|XP_011259942.1| PREDICTED: metalloproteinase inhibitor 3 isoform X1 [Camponotus floridanus]	Sinvprot:gi|751199436|ref|XP_011156559.1| PREDICTED: LOW QUALITY PROTEIN: tissue inhibitor of metalloproteases [Solenopsis invicta]	uniprot-apis3AUP000005203:tr|A0A087ZPM5|A0A087ZPM5_APIME Uncharacterized protein OS=Apis mellifera GN=LOC100576956 PE=4 SV=1	uniprot-cflo3AUP000000311:tr|E2AKR7|E2AKR7_CAMFO Metalloproteinase inhibitor 3 OS=Camponotus floridanus GN=EAG_12870 PE=4 SV=1	uniprot-sinv3AUP000006539:tr|E9I906|E9I906_SOLIN Putative uncharacterized protein (Fragment) OS=Solenopsis invicta GN=SINV_10709 PE=4 SV=1
OMA09820	Amelprot:gi|571564339|ref|XP_006562316.1| PREDICTED: uncharacterized protein LOC551765 [Apis mellifera]	Cfelprot80:comp58624_c0_seq1_439_1739	Cfloprot:gi|752884426|ref|XP_011259953.1| PREDICTED: uncharacterized protein LOC105253544 isoform X1 [Camponotus floridanus]	Sinvprot:gi|751199444|ref|XP_011156607.1| PREDICTED: uncharacterized protein LOC105193736 isoform X1 [Solenopsis invicta]	uniprot-apis3AUP000005203:tr|A0A087ZPM6|A0A087ZPM6_APIME Uncharacterized protein OS=Apis mellifera GN=LOC551765 PE=4 SV=1	uniprot-cflo3AUP000000311:tr|E2AKR9|E2AKR9_CAMFO Putative uncharacterized protein (Fragment) OS=Camponotus floridanus GN=EAG_12872 PE=4 SV=1	uniprot-sinv3AUP000006539:tr|E9I907|E9I907_SOLIN Putative uncharacterized protein (Fragment) OS=Solenopsis invicta GN=SINV_10578 PE=4 SV=1
OMA04888	Amelprot:gi|571564346|ref|XP_006562317.1| PREDICTED: laccase-1 [Apis mellifera]	Cfelprot80:comp56383_c0_seq1_1_1907	Cfloprot:gi|752884430|ref|XP_011259955.1| PREDICTED: laccase-5 [Camponotus floridanus]	Sinvprot:gi|751199448|ref|XP_011156625.1| PREDICTED: laccase-5-like [Solenopsis invicta]	uniprot-apis3AUP000005203:tr|A0A087ZPF2|A0A087ZPF2_APIME Uncharacterized protein OS=Apis mellifera GN=Lac2 PE=4 SV=1	uniprot-cflo3AUP000000311:tr|E2AKS0|E2AKS0_CAMFO Laccase-4 OS=Camponotus floridanus GN=EAG_12873 PE=4 SV=1	uniprot-sinv3AUP000006539:tr|E9I908|E9I908_SOLIN Putative uncharacterized protein (Fragment) OS=Solenopsis invicta GN=SINV_01510 PE=4 SV=1
OMA07570	Amelprot:gi|328785451|ref|XP_623432.3| PREDICTED: poly(A)-specific ribonuclease PARN-like domain-containing protein 1-like isoform X1 [Apis mellifera]	Cfelprot80:comp63640_c0_seq10_1958_2241	Cfloprot:gi|752886924|ref|XP_011261311.1| PREDICTED: poly(A)-specific ribonuclease PARN-like domain-containing protein 1 [Camponotus floridanus]	Sinvprot:gi|751199477|ref|XP_011156770.1| PREDICTED: poly(A)-specific ribonuclease PARN-like domain-containing protein 1 [Solenopsis invicta]	uniprot-apis3AUP000005203:tr|A0A088ACZ8|A0A088ACZ8_APIME Uncharacterized protein OS=Apis mellifera GN=LOC551033 PE=4 SV=1	uniprot-cflo3AUP000000311:tr|E2ANM1|E2ANM1_CAMFO Poly(A)-specific ribonuclease PARN-like domain-containing protein 1 OS=Camponotus floridanus GN=EAG_14442 PE=4 SV=1	uniprot-sinv3AUP000006539:tr|E9I915|E9I915_SOLIN Putative uncharacterized protein (Fragment) OS=Solenopsis invicta GN=SINV_00082 PE=4 SV=1
OMA07116	Amelprot:gi|571578372|ref|XP_006572375.1| PREDICTED: forkhead box protein K1-like isoform X2 [Apis mellifera]	Cfelprot80:comp33403_c0_seq1_105_1767	Cfloprot:gi|752859955|ref|XP_011268713.1| PREDICTED: forkhead box protein K1 isoform X2 [Camponotus floridanus]	Sinvprot:gi|751199492|ref|XP_011156854.1| PREDICTED: forkhead box protein K1 isoform X2 [Solenopsis invicta]	uniprot-apis3AUP000005203:tr|A0A088AM63|A0A088AM63_APIME Uncharacterized protein OS=Apis mellifera GN=LOC551340 PE=4 SV=1	uniprot-cflo3AUP000000311:tr|E1ZV95|E1ZV95_CAMFO Forkhead box protein K2 OS=Camponotus floridanus GN=EAG_04093 PE=4 SV=1	uniprot-sinv3AUP000006539:tr|E9I926|E9I926_SOLIN Putative uncharacterized protein (Fragment) OS=Solenopsis invicta GN=SINV_00202 PE=4 SV=1
OMA14668	Amelprot:gi|110774231|ref|XP_397266.3| PREDICTED: ras-related protein Rab-40C-like isoform 2 [Apis mellifera]	Cfelprot80:comp44989_c0_seq1_1_194	Cfloprot:gi|752860606|ref|XP_011252785.1| PREDICTED: ras-related protein Rab-40C [Camponotus floridanus]	Sinvprot:gi|751199500|ref|XP_011156894.1| PREDICTED: ras-related protein Rab-40B [Solenopsis invicta]	uniprot-apis3AUP000005203:tr|A0A088AQW8|A0A088AQW8_APIME Uncharacterized protein OS=Apis mellifera GN=LOC413827 PE=4 SV=1	uniprot-cflo3AUP000000311:tr|E1ZW03|E1ZW03_CAMFO Ras-related protein Rab-40C OS=Camponotus floridanus GN=EAG_02196 PE=3 SV=1	uniprot-sinv3AUP000006539:tr|E9I927|E9I927_SOLIN Putative uncharacterized protein (Fragment) OS=Solenopsis invicta GN=SINV_10382 PE=4 SV=1
OMA16828	Amelprot:gi|571558042|ref|XP_624856.2| PREDICTED: BTB/POZ domain-containing protein KCTD5-like, partial [Apis mellifera]	Cfelprot80:comp59276_c0_seq2_333_1000	Cfloprot:gi|752884465|ref|XP_011259974.1| PREDICTED: BTB/POZ domain-containing protein KCTD5 isoform X1 [Camponotus floridanus]	Sinvprot:gi|751199504|ref|XP_011156907.1| PREDICTED: BTB/POZ domain-containing protein KCTD5 isoform X1 [Solenopsis invicta]	uniprot-apis3AUP000005203:tr|A0A088AQX0|A0A088AQX0_APIME Uncharacterized protein OS=Apis mellifera GN=LOC552480 PE=4 SV=1	uniprot-cflo3AUP000000311:tr|E2AKU2|E2AKU2_CAMFO BTB/POZ domain-containing protein KCTD5 OS=Camponotus floridanus GN=EAG_09425 PE=4 SV=1	uniprot-sinv3AUP000006539:tr|E9I929|E9I929_SOLIN Putative uncharacterized protein (Fragment) OS=Solenopsis invicta GN=SINV_04935 PE=4 SV=1
OMA10228	Amelprot:gi|66505812|ref|XP_397097.2| PREDICTED: 3-oxoacyl-[acyl-carrier-protein] synthase, mitochondrial-like [Apis mellifera]	Cfelprot80:comp59938_c0_seq3_416_1639	Cfloprot:gi|752890106|ref|XP_011263033.1| PREDICTED: 3-oxoacyl-[acyl-carrier-protein] synthase, mitochondrial [Camponotus floridanus]	Sinvprot:gi|751199518|ref|XP_011156979.1| PREDICTED: 3-oxoacyl-[acyl-carrier-protein] synthase, mitochondrial [Solenopsis invicta]	uniprot-apis3AUP000005203:tr|A0A088AQA3|A0A088AQA3_APIME 3-oxoacyl-[acyl-carrier-protein] synthase OS=Apis mellifera GN=LOC413655 PE=3 SV=1	uniprot-cflo3AUP000000311:tr|E2AS13|E2AS13_CAMFO 3-oxoacyl-[acyl-carrier-protein] synthase OS=Camponotus floridanus GN=EAG_10124 PE=3 SV=1	uniprot-sinv3AUP000006539:tr|E9I932|E9I932_SOLIN Putative uncharacterized protein (Fragment) OS=Solenopsis invicta GN=SINV_00733 PE=4 SV=1
OMA05022	Amelprot:gi|571519766|ref|XP_006566843.1| PREDICTED: gametogenetin-binding protein 2-like isoform X3 [Apis mellifera]	Cfelprot80:comp34279_c0_seq1_532_2563	Cfloprot:gi|752890104|ref|XP_011263032.1| PREDICTED: gametogenetin-binding protein 2-like [Camponotus floridanus]	Sinvprot:gi|751199520|ref|XP_011156989.1| PREDICTED: gametogenetin-binding protein 2-like isoform X1 [Solenopsis invicta]	uniprot-apis3AUP000005203:tr|A0A088AQA0|A0A088AQA0_APIME Uncharacterized protein OS=Apis mellifera GN=LOC724214 PE=4 SV=1	uniprot-cflo3AUP000000311:tr|E2AS12|E2AS12_CAMFO Gametogenetin-binding protein 2-like OS=Camponotus floridanus GN=EAG_10123 PE=4 SV=1	uniprot-sinv3AUP000006539:tr|E9I933|E9I933_SOLIN Putative uncharacterized protein (Fragment) OS=Solenopsis invicta GN=SINV_07343 PE=4 SV=1
OMA15112	Amelprot:gi|571519757|ref|XP_006566840.1| PREDICTED: neuferricin-like [Apis mellifera]	Cfelprot80:comp53808_c0_seq3_129_849	Cfloprot:gi|752890090|ref|XP_011263024.1| PREDICTED: neuferricin [Camponotus floridanus]	Sinvprot:gi|751199526|ref|XP_011157017.1| PREDICTED: neuferricin [Solenopsis invicta]	uniprot-apis3AUP000005203:tr|A0A088AQA4|A0A088AQA4_APIME Uncharacterized protein OS=Apis mellifera GN=LOC724256 PE=4 SV=1	uniprot-cflo3AUP000000311:tr|E2AS10|E2AS10_CAMFO Cytochrome b5 domain-containing protein 2 OS=Camponotus floridanus GN=EAG_10121 PE=4 SV=1	uniprot-sinv3AUP000006539:tr|E9I935|E9I935_SOLIN Putative uncharacterized protein (Fragment) OS=Solenopsis invicta GN=SINV_01173 PE=4 SV=1
OMA19673	Amelprot:gi|328786450|ref|XP_003250792.1| PREDICTED: ATP synthase subunit delta, mitochondrial isoform 1 [Apis mellifera]	Cfelprot80:comp66850_c0_seq1_109_580	Cfloprot:gi|752873372|ref|XP_011253966.1| PREDICTED: ATP synthase subunit delta, mitochondrial [Camponotus floridanus]	Sinvprot:gi|751199542|ref|XP_011157092.1| PREDICTED: ATP synthase subunit delta, mitochondrial [Solenopsis invicta]	uniprot-apis3AUP000005203:tr|A0A088AHV3|A0A088AHV3_APIME Uncharacterized protein OS=Apis mellifera GN=Atp5d PE=3 SV=1	uniprot-cflo3AUP000000311:tr|E2A9J2|E2A9J2_CAMFO ATP synthase subunit delta, mitochondrial (Fragment) OS=Camponotus floridanus GN=EAG_10844 PE=3 SV=1	uniprot-sinv3AUP000006539:tr|E9I937|E9I937_SOLIN Putative uncharacterized protein (Fragment) OS=Solenopsis invicta GN=SINV_15147 PE=3 SV=1
OMA06502	Amelprot:gi|66517323|ref|XP_393685.2| PREDICTED: radial spoke head protein 3 homolog isoform X2 [Apis mellifera]	Cfelprot80:comp65834_c0_seq11_219_1968	Cfloprot:gi|752873382|ref|XP_011253971.1| PREDICTED: radial spoke head protein 3 homolog B isoform X2 [Camponotus floridanus]	Sinvprot:gi|751199545|ref|XP_011157105.1| PREDICTED: radial spoke head protein 3 homolog [Solenopsis invicta]	uniprot-apis3AUP000005203:tr|A0A088AHV1|A0A088AHV1_APIME Uncharacterized protein OS=Apis mellifera GN=LOC410202 PE=4 SV=1	uniprot-cflo3AUP000000311:tr|E2A9J4|E2A9J4_CAMFO Radial spoke head protein 3-like protein OS=Camponotus floridanus GN=EAG_10846 PE=4 SV=1	uniprot-sinv3AUP000006539:tr|E9I939|E9I939_SOLIN Putative uncharacterized protein (Fragment) OS=Solenopsis invicta GN=SINV_06801 PE=4 SV=1
OMA14717	Amelprot:gi|571499776|ref|XP_006558638.1| PREDICTED: uncharacterized protein LOC102654789 [Apis mellifera]	Cfelprot80:comp45469_c0_seq1_369_1186	Cfloprot:gi|752894585|ref|XP_011265476.1| PREDICTED: uncharacterized protein LOC105256895 isoform X1 [Camponotus floridanus]	Sinvprot:gi|751199567|ref|XP_011157226.1| PREDICTED: uncharacterized protein LOC105194158 [Solenopsis invicta]	uniprot-apis3AUP000005203:tr|A0A088A8N3|A0A088A8N3_APIME Uncharacterized protein OS=Apis mellifera GN=LOC102654789 PE=4 SV=1	uniprot-cflo3AUP000000311:tr|E2AWY2|E2AWY2_CAMFO Putative uncharacterized protein OS=Camponotus floridanus GN=EAG_04236 PE=4 SV=1	uniprot-sinv3AUP000006539:tr|E9I951|E9I951_SOLIN Putative uncharacterized protein (Fragment) OS=Solenopsis invicta GN=SINV_10674 PE=4 SV=1
OMA07545	Amelprot:gi|66560172|ref|XP_392660.2| PREDICTED: T-complex protein 1 subunit alpha-like isoform 1 [Apis mellifera]	Cfelprot80:comp36107_c0_seq1_88_1705	Cfloprot:gi|752883229|ref|XP_011259307.1| PREDICTED: T-complex protein 1 subunit alpha [Camponotus floridanus]	Sinvprot:gi|751199585|ref|XP_011157462.1| PREDICTED: T-complex protein 1 subunit alpha, partial [Solenopsis invicta]	uniprot-apis3AUP000005203:tr|A0A088AVZ9|A0A088AVZ9_APIME Uncharacterized protein OS=Apis mellifera GN=LOC409134 PE=3 SV=1	uniprot-cflo3AUP000000311:tr|E2AJN5|E2AJN5_CAMFO T-complex protein 1 subunit alpha (Fragment) OS=Camponotus floridanus GN=EAG_03441 PE=3 SV=1	uniprot-sinv3AUP000006539:tr|E9I962|E9I962_SOLIN T-complex protein 1 subunit alpha (Fragment) OS=Solenopsis invicta GN=SINV_11997 PE=3 SV=1
OMA00884	Amelprot:gi|571575495|ref|XP_006557759.1| PREDICTED: uncharacterized protein DDB_G0274915-like isoform X2 [Apis mellifera]	Cfelprot80:comp44620_c0_seq1_1_4451	Cfloprot:gi|752871616|ref|XP_011253013.1| PREDICTED: nuclear pore complex protein DDB_G0274915 homolog [Camponotus floridanus]	Sinvprot:gi|751199599|ref|XP_011157532.1| PREDICTED: mucin-17-like isoform X1 [Solenopsis invicta]	uniprot-apis3AUP000005203:tr|A0A088ARR4|A0A088ARR4_APIME Uncharacterized protein OS=Apis mellifera GN=LOC726354 PE=4 SV=1	uniprot-cflo3AUP000000311:tr|E2A7Q4|E2A7Q4_CAMFO Putative uncharacterized protein OS=Camponotus floridanus GN=EAG_01230 PE=4 SV=1	uniprot-sinv3AUP000006539:tr|E9I966|E9I966_SOLIN Putative uncharacterized protein (Fragment) OS=Solenopsis invicta GN=SINV_00681 PE=4 SV=1
OMA13039	Amelprot:gi|66501511|ref|XP_624123.1| PREDICTED: protein farnesyltransferase/geranylgeranyltransferase type-1 subunit alpha-like isoform X2 [Apis mellifera]	Cfelprot80:comp66254_c1_seq4_682_1437	Cfloprot:gi|752874967|ref|XP_011254823.1| PREDICTED: protein farnesyltransferase/geranylgeranyltransferase type-1 subunit alpha [Camponotus floridanus]	Sinvprot:gi|751199699|ref|XP_011158029.1| PREDICTED: protein farnesyltransferase/geranylgeranyltransferase type-1 subunit alpha [Solenopsis invicta]	uniprot-apis3AUP000005203:tr|A0A087ZTY8|A0A087ZTY8_APIME Uncharacterized protein OS=Apis mellifera GN=LOC551732 PE=4 SV=1	uniprot-cflo3AUP000000311:tr|E2AB86|E2AB86_CAMFO Protein farnesyltransferase/geranylgeranyltransferase type-1 subunit alpha OS=Camponotus floridanus GN=EAG_01102 PE=4 SV=1	uniprot-sinv3AUP000006539:tr|E9I986|E9I986_SOLIN Putative uncharacterized protein (Fragment) OS=Solenopsis invicta GN=SINV_09819 PE=4 SV=1
OMA11331	Amelprot:gi|328792875|ref|XP_001120896.2| PREDICTED: probable tyrosine-protein phosphatase F54C8.4-like [Apis mellifera]	Cfelprot80:comp43428_c0_seq2_309_1543	Cfloprot:gi|752874939|ref|XP_011254808.1| PREDICTED: RNA/RNP complex-1-interacting phosphatase [Camponotus floridanus]	Sinvprot:gi|751199725|ref|XP_011158158.1| PREDICTED: RNA/RNP complex-1-interacting phosphatase [Solenopsis invicta]	uniprot-apis3AUP000005203:tr|A0A087ZU20|A0A087ZU20_APIME Uncharacterized protein OS=Apis mellifera GN=LOC724994 PE=4 SV=1	uniprot-cflo3AUP000000311:tr|E2AB72|E2AB72_CAMFO Probable tyrosine-protein phosphatase F54C8.4 OS=Camponotus floridanus GN=EAG_01088 PE=4 SV=1	uniprot-sinv3AUP000006539:tr|E9I996|E9I996_SOLIN Putative uncharacterized protein (Fragment) OS=Solenopsis invicta GN=SINV_03128 PE=4 SV=1
OMA06197	Amelprot:gi|328792143|ref|XP_393202.3| PREDICTED: poly(A) polymerase alpha isoform X2 [Apis mellifera]	Cfelprot80:comp63572_c0_seq2_134_1522	Cfloprot:gi|752872258|ref|XP_011253358.1| PREDICTED: poly(A) polymerase type 3 isoform X2 [Camponotus floridanus]	Sinvprot:gi|751199779|ref|XP_011158513.1| PREDICTED: poly(A) polymerase type 3 [Solenopsis invicta]	uniprot-apis3AUP000005203:tr|A0A088AK58|A0A088AK58_APIME Uncharacterized protein OS=Apis mellifera GN=hrg PE=4 SV=1	uniprot-cflo3AUP000000311:tr|E2A8E1|E2A8E1_CAMFO Poly(A) polymerase gamma OS=Camponotus floridanus GN=EAG_05508 PE=4 SV=1	uniprot-sinv3AUP000006539:tr|E9I9A8|E9I9A8_SOLIN Putative uncharacterized protein (Fragment) OS=Solenopsis invicta GN=SINV_14294 PE=4 SV=1
OMA06597	Amelprot:gi|328792621|ref|XP_001121935.2| PREDICTED: hrp65 protein-like isoform X1 [Apis mellifera]	Cfelprot80:comp61962_c2_seq2_1_1633	Cfloprot:gi|752869355|ref|XP_011251789.1| PREDICTED: hrp65 protein-like [Camponotus floridanus]	Sinvprot:gi|751199787|ref|XP_011158554.1| PREDICTED: protein no-on-transient A-like [Solenopsis invicta]	uniprot-apis3AUP000005203:tr|A0A088ATG4|A0A088ATG4_APIME Uncharacterized protein OS=Apis mellifera GN=LOC726178 PE=4 SV=1	uniprot-cflo3AUP000000311:tr|E2A569|E2A569_CAMFO Hrp65 protein OS=Camponotus floridanus GN=EAG_14755 PE=4 SV=1	uniprot-sinv3AUP000006539:tr|E9I9B4|E9I9B4_SOLIN Putative uncharacterized protein (Fragment) OS=Solenopsis invicta GN=SINV_09391 PE=4 SV=1
OMA13113	Amelprot:gi|571506965|ref|XP_006570921.1| PREDICTED: protein tipE-like isoform X2 [Apis mellifera]	Cfelprot80:comp63415_c2_seq1_1551_1630	Cfloprot:gi|752869367|ref|XP_011251795.1| PREDICTED: protein tipE [Camponotus floridanus]	Sinvprot:gi|751199796|ref|XP_011158607.1| PREDICTED: protein tipE [Solenopsis invicta]	uniprot-apis3AUP000005203:tr|A0A088A7P9|A0A088A7P9_APIME Uncharacterized protein OS=Apis mellifera GN=LOC550899 PE=4 SV=1	uniprot-cflo3AUP000000311:tr|E2A570|E2A570_CAMFO Protein tipE OS=Camponotus floridanus GN=EAG_14756 PE=4 SV=1	uniprot-sinv3AUP000006539:tr|E9I9B6|E9I9B6_SOLIN Putative uncharacterized protein (Fragment) OS=Solenopsis invicta GN=SINV_11441 PE=4 SV=1
OMA16049	Amelprot:gi|571506950|ref|XP_006570918.1| PREDICTED: protein tipE-like isoform X1 [Apis mellifera]	Cfelprot80:comp64578_c0_seq1_905_1599	Cfloprot:gi|752869363|ref|XP_011251792.1| PREDICTED: protein tipE [Camponotus floridanus]	Sinvprot:gi|751199792|ref|XP_011158584.1| PREDICTED: protein tipE [Solenopsis invicta]	uniprot-apis3AUP000005203:tr|A0A088A836|A0A088A836_APIME Uncharacterized protein OS=Apis mellifera GN=LOC102654970 PE=4 SV=1	uniprot-cflo3AUP000000311:tr|E2A572|E2A572_CAMFO Protein tipE OS=Camponotus floridanus GN=EAG_14758 PE=4 SV=1	uniprot-sinv3AUP000006539:tr|E9I9B8|E9I9B8_SOLIN Putative uncharacterized protein (Fragment) OS=Solenopsis invicta GN=SINV_04320 PE=4 SV=1
OMA10353	Amelprot:gi|328778128|ref|XP_395474.3| PREDICTED: sprouty-related, EVH1 domain-containing protein 2 isoformX2 [Apis mellifera]	Cfelprot80:comp64327_c0_seq5_141_1327	Cfloprot:gi|752880671|ref|XP_011257913.1| PREDICTED: sprouty-related, EVH1 domain-containing protein 2 isoform X1 [Camponotus floridanus]	Sinvprot:gi|751199827|ref|XP_011158863.1| PREDICTED: sprouty-related, EVH1 domain-containing protein 2 isoform X1 [Solenopsis invicta]	uniprot-apis3AUP000005203:tr|A0A087ZX21|A0A087ZX21_APIME Uncharacterized protein OS=Apis mellifera GN=Spred PE=4 SV=1	uniprot-cflo3AUP000000311:tr|E2AH03|E2AH03_CAMFO Sprouty-related, EVH1 domain-containing protein 2 OS=Camponotus floridanus GN=EAG_06212 PE=4 SV=1	uniprot-sinv3AUP000006539:tr|E9I9E2|E9I9E2_SOLIN Putative uncharacterized protein (Fragment) OS=Solenopsis invicta GN=SINV_08767 PE=4 SV=1
OMA03090	Amelprot:gi|328778764|ref|XP_001122102.2| PREDICTED: protein SMG8-like [Apis mellifera]	Cfelprot80:comp63028_c0_seq2_407_3142	Cfloprot:gi|752896091|ref|XP_011266292.1| PREDICTED: protein SMG8 isoform X1 [Camponotus floridanus]	Sinvprot:gi|751199839|ref|XP_011158945.1| PREDICTED: protein SMG8 [Solenopsis invicta]	uniprot-apis3AUP000005203:tr|A0A087ZNV5|A0A087ZNV5_APIME Uncharacterized protein OS=Apis mellifera GN=LOC726359 PE=4 SV=1	uniprot-cflo3AUP000000311:tr|E2AYJ9|E2AYJ9_CAMFO UPF0487 protein C17orf71-like protein OS=Camponotus floridanus GN=EAG_15969 PE=4 SV=1	uniprot-sinv3AUP000006539:tr|E9I9E8|E9I9E8_SOLIN Putative uncharacterized protein (Fragment) OS=Solenopsis invicta GN=SINV_02437 PE=4 SV=1
OMA17319	Amelprot:gi|215598871|ref|NP_001135933.1| transmembrane protein 98 [Apis mellifera]	Cfelprot80:comp58206_c0_seq1_374_1095	Cfloprot:gi|752878979|ref|XP_011256998.1| PREDICTED: transmembrane protein 98-like isoform X2 [Camponotus floridanus]	Sinvprot:gi|751199853|ref|XP_011159016.1| PREDICTED: transmembrane protein 98-like [Solenopsis invicta]	uniprot-apis3AUP000005203:tr|A0A087ZNV8|A0A087ZNV8_APIME Uncharacterized protein OS=Apis mellifera GN=Tmem98 PE=4 SV=1	uniprot-cflo3AUP000000311:tr|E2AF37|E2AF37_CAMFO Transmembrane protein 98 OS=Camponotus floridanus GN=EAG_10530 PE=4 SV=1	uniprot-sinv3AUP000006539:tr|E9I9F2|E9I9F2_SOLIN Putative uncharacterized protein (Fragment) OS=Solenopsis invicta GN=SINV_08528 PE=4 SV=1
OMA05932	Amelprot:gi|571542551|ref|XP_006559544.1| PREDICTED: ATP-binding cassette sub-family F member 2-like isoform X2 [Apis mellifera]	Cfelprot80:comp56221_c0_seq1_221_2001	Cfloprot:gi|752878975|ref|XP_011256996.1| PREDICTED: ATP-binding cassette sub-family F member 2 [Camponotus floridanus]	Sinvprot:gi|751199849|ref|XP_011158998.1| PREDICTED: ATP-binding cassette sub-family F member 2 [Solenopsis invicta]	uniprot-apis3AUP000005203:tr|A0A087ZP04|A0A087ZP04_APIME Uncharacterized protein OS=Apis mellifera GN=LOC102656322 PE=3 SV=1	uniprot-cflo3AUP000000311:tr|E2AF36|E2AF36_CAMFO ATP-binding cassette sub-family F member 2 OS=Camponotus floridanus GN=EAG_10529 PE=3 SV=1	uniprot-sinv3AUP000006539:tr|E9I9F3|E9I9F3_SOLIN Putative uncharacterized protein (Fragment) OS=Solenopsis invicta GN=SINV_08137 PE=3 SV=1
OMA08239	Amelprot:gi|328784831|ref|XP_393060.4| PREDICTED: pancreatic triacylglycerol lipase-like isoform X2 [Apis mellifera]	Cfelprot80:comp60359_c0_seq1_162_1525	Cfloprot:gi|752878972|ref|XP_011256995.1| PREDICTED: pancreatic lipase-related protein 2-like [Camponotus floridanus]	Sinvprot:gi|751199857|ref|XP_011159038.1| PREDICTED: pancreatic lipase-related protein 2-like [Solenopsis invicta]	uniprot-apis3AUP000005203:tr|A0A087ZSW2|A0A087ZSW2_APIME Uncharacterized protein OS=Apis mellifera GN=LOC409553 PE=3 SV=1	uniprot-cflo3AUP000000311:tr|E2AF33|E2AF33_CAMFO Pancreatic triacylglycerol lipase OS=Camponotus floridanus GN=EAG_10526 PE=3 SV=1	uniprot-sinv3AUP000006539:tr|E9I9F5|E9I9F5_SOLIN Putative uncharacterized protein (Fragment) OS=Solenopsis invicta GN=SINV_01673 PE=3 SV=1
OMA12856	Amelprot:gi|571511762|ref|XP_006561164.1| PREDICTED: L-galactose dehydrogenase-like isoform X5 [Apis mellifera]	Cfelprot80:comp62692_c0_seq1_447_1484	Cfloprot:gi|752878954|ref|XP_011256986.1| PREDICTED: L-galactose dehydrogenase-like [Camponotus floridanus]	Sinvprot:gi|751199859|ref|XP_011159048.1| PREDICTED: L-galactose dehydrogenase-like isoform X1 [Solenopsis invicta]	uniprot-apis3AUP000005203:tr|A0A088AGZ3|A0A088AGZ3_APIME Uncharacterized protein OS=Apis mellifera GN=LOC551849 PE=4 SV=1	uniprot-cflo3AUP000000311:tr|E2AF32|E2AF32_CAMFO D-arabinose 1-dehydrogenase OS=Camponotus floridanus GN=EAG_10525 PE=4 SV=1	uniprot-sinv3AUP000006539:tr|E9I9F6|E9I9F6_SOLIN Putative uncharacterized protein (Fragment) OS=Solenopsis invicta GN=SINV_06655 PE=4 SV=1
OMA04298	Amelprot:gi|66513990|ref|XP_394735.2| PREDICTED: leucine-zipper-like transcription regulator 1 isoform X2 [Apis mellifera]	Cfelprot80:comp61908_c0_seq1_314_2571	Cfloprot:gi|752878935|ref|XP_011256976.1| PREDICTED: leucine-zipper-like transcriptional regulator 1 [Camponotus floridanus]	Sinvprot:gi|751199873|ref|XP_011159106.1| PREDICTED: leucine-zipper-like transcriptional regulator 1 [Solenopsis invicta]	uniprot-apis3AUP000005203:tr|A0A088ASA1|A0A088ASA1_APIME Uncharacterized protein OS=Apis mellifera GN=LZTR1 PE=4 SV=1	uniprot-cflo3AUP000000311:tr|E2AF29|E2AF29_CAMFO Leucine-zipper-like transcriptional regulator 1 OS=Camponotus floridanus GN=EAG_10522 PE=4 SV=1	uniprot-sinv3AUP000006539:tr|E9I9G1|E9I9G1_SOLIN Putative uncharacterized protein (Fragment) OS=Solenopsis invicta GN=SINV_80476 PE=4 SV=1
OMA12071	Amelprot:gi|328777838|ref|XP_395493.4| PREDICTED: histone-lysine N-methyltransferase pr-set7 [Apis mellifera]	Cfelprot80:comp53923_c0_seq1_703_1465	Cfloprot:gi|752878933|ref|XP_011256975.1| PREDICTED: histone-lysine N-methyltransferase pr-set7 [Camponotus floridanus]	Sinvprot:gi|751199875|ref|XP_011159118.1| PREDICTED: histone-lysine N-methyltransferase pr-set7 [Solenopsis invicta]	uniprot-apis3AUP000005203:tr|A0A087ZQT8|A0A087ZQT8_APIME Uncharacterized protein OS=Apis mellifera GN=pr-set7 PE=4 SV=1	uniprot-cflo3AUP000000311:tr|E2AF28|E2AF28_CAMFO Histone-lysine N-methyltransferase pr-set7 (Fragment) OS=Camponotus floridanus GN=EAG_10521 PE=4 SV=1	uniprot-sinv3AUP000006539:tr|E9I9G2|E9I9G2_SOLIN Putative uncharacterized protein (Fragment) OS=Solenopsis invicta GN=SINV_02694 PE=4 SV=1
OMA01254	Amelprot:gi|571542239|ref|XP_006558984.1| PREDICTED: protein strawberry notch-like [Apis mellifera]	Cfelprot80:comp66552_c0_seq25_1_2559	Cfloprot:gi|752878925|ref|XP_011256971.1| PREDICTED: protein strawberry notch-like [Camponotus floridanus]	Sinvprot:gi|751199877|ref|XP_011159128.1| PREDICTED: protein strawberry notch [Solenopsis invicta]	uniprot-apis3AUP000005203:tr|A0A087ZQX5|A0A087ZQX5_APIME Uncharacterized protein OS=Apis mellifera GN=LOC100578826 PE=4 SV=1	uniprot-cflo3AUP000000311:tr|E2AF27|E2AF27_CAMFO Protein strawberry notch OS=Camponotus floridanus GN=EAG_10520 PE=4 SV=1	uniprot-sinv3AUP000006539:tr|E9I9G3|E9I9G3_SOLIN Putative uncharacterized protein (Fragment) OS=Solenopsis invicta GN=SINV_05385 PE=4 SV=1
OMA06082	Amelprot:gi|66525391|ref|XP_394094.2| PREDICTED: xaa-Pro aminopeptidase 1-like isoform X3 [Apis mellifera]	Cfelprot80:comp66175_c0_seq11_387_2004	Cfloprot:gi|752878919|ref|XP_011256968.1| PREDICTED: xaa-Pro aminopeptidase 1 [Camponotus floridanus]	Sinvprot:gi|751199887|ref|XP_011159178.1| PREDICTED: xaa-Pro aminopeptidase 1 [Solenopsis invicta]	uniprot-apis3AUP000005203:tr|A0A088AF99|A0A088AF99_APIME Uncharacterized protein OS=Apis mellifera GN=LOC410616 PE=3 SV=1	uniprot-cflo3AUP000000311:tr|E2AF24|E2AF24_CAMFO Xaa-Pro aminopeptidase 1 OS=Camponotus floridanus GN=EAG_10517 PE=3 SV=1	uniprot-sinv3AUP000006539:tr|E9I9G8|E9I9G8_SOLIN Putative uncharacterized protein (Fragment) OS=Solenopsis invicta GN=SINV_07192 PE=3 SV=1
OMA16132	Amelprot:gi|571574553|ref|XP_006563488.1| PREDICTED: nuclear receptor-binding factor 2-like [Apis mellifera]	Cfelprot80:comp67306_c0_seq1_35_649	Cfloprot:gi|752878913|ref|XP_011256963.1| PREDICTED: nuclear receptor-binding factor 2-like [Camponotus floridanus]	Sinvprot:gi|751199889|ref|XP_011159191.1| PREDICTED: nuclear receptor-binding factor 2-like [Solenopsis invicta]	uniprot-apis3AUP000005203:tr|A0A088AFA0|A0A088AFA0_APIME Uncharacterized protein OS=Apis mellifera GN=LOC102656905 PE=4 SV=1	uniprot-cflo3AUP000000311:tr|E2AF21|E2AF21_CAMFO Nuclear receptor-binding factor 2 (Fragment) OS=Camponotus floridanus GN=EAG_10514 PE=4 SV=1	uniprot-sinv3AUP000006539:tr|E9I9H0|E9I9H0_SOLIN Putative uncharacterized protein (Fragment) OS=Solenopsis invicta GN=SINV_13339 PE=4 SV=1
OMA11923	Amelprot:gi|571527928|ref|XP_006564221.1| PREDICTED: estradiol 17-beta-dehydrogenase 2 [Apis mellifera]	Cfelprot80:comp59545_c0_seq4_1040_2052	Cfloprot:gi|752882525|ref|XP_011258919.1| PREDICTED: retinol dehydrogenase 7 isoform X1 [Camponotus floridanus]	Sinvprot:gi|751199934|ref|XP_011159479.1| PREDICTED: D-beta-hydroxybutyrate dehydrogenase, mitochondrial [Solenopsis invicta]	uniprot-apis3AUP000005203:tr|A0A087ZTA4|A0A087ZTA4_APIME Uncharacterized protein OS=Apis mellifera GN=shroud PE=4 SV=1	uniprot-cflo3AUP000000311:tr|E2AIZ7|E2AIZ7_CAMFO Estradiol 17-beta-dehydrogenase 2 OS=Camponotus floridanus GN=EAG_15584 PE=4 SV=1	uniprot-sinv3AUP000006539:tr|E9I9H5|E9I9H5_SOLIN Putative uncharacterized protein (Fragment) OS=Solenopsis invicta GN=SINV_02942 PE=4 SV=1
OMA04725	Amelprot:gi|66513610|ref|XP_394713.2| PREDICTED: conserved oligomeric Golgi complex subunit 7 [Apis mellifera]	Cfelprot80:comp65798_c1_seq3_1041_3119	Cfloprot:gi|752893151|ref|XP_011264701.1| PREDICTED: conserved oligomeric Golgi complex subunit 7 isoform X2 [Camponotus floridanus]	Sinvprot:gi|751199944|ref|XP_011159533.1| PREDICTED: conserved oligomeric Golgi complex subunit 7 [Solenopsis invicta]	uniprot-apis3AUP000005203:tr|A0A088ALX6|A0A088ALX6_APIME Uncharacterized protein OS=Apis mellifera GN=Cog7 PE=4 SV=1	uniprot-cflo3AUP000000311:tr|E2AVL0|E2AVL0_CAMFO Conserved oligomeric Golgi complex subunit 7 OS=Camponotus floridanus GN=EAG_13841 PE=4 SV=1	uniprot-sinv3AUP000006539:tr|E9I9I1|E9I9I1_SOLIN Putative uncharacterized protein (Fragment) OS=Solenopsis invicta GN=SINV_01051 PE=4 SV=1
OMA04685	Amelprot:gi|328776802|ref|XP_624007.3| PREDICTED: ATP-dependent RNA helicase SUV3 homolog, mitochondrial-like [Apis mellifera]	Cfelprot80:comp45383_c0_seq1_1964_2266	Cfloprot:gi|752868982|ref|XP_011251586.1| PREDICTED: ATP-dependent RNA helicase SUV3 homolog, mitochondrial [Camponotus floridanus]	Sinvprot:gi|751199971|ref|XP_011159689.1| PREDICTED: ATP-dependent RNA helicase SUV3 homolog, mitochondrial [Solenopsis invicta]	uniprot-apis3AUP000005203:tr|A0A088AE23|A0A088AE23_APIME Uncharacterized protein OS=Apis mellifera GN=LOC551613 PE=4 SV=1	uniprot-cflo3AUP000000311:tr|E2A4R8|E2A4R8_CAMFO ATP-dependent RNA helicase SUV3-like protein, mitochondrial OS=Camponotus floridanus GN=EAG_14870 PE=4 SV=1	uniprot-sinv3AUP000006539:tr|E9I9I9|E9I9I9_SOLIN Putative uncharacterized protein (Fragment) OS=Solenopsis invicta GN=SINV_08177 PE=4 SV=1
OMA12935	Amelprot:gi|66550989|ref|XP_625179.1| PREDICTED: mitoferrin-1 isoformX2 [Apis mellifera]	Cfelprot80:comp60769_c0_seq3_653_1664	Cfloprot:gi|752868978|ref|XP_011251584.1| PREDICTED: mitoferrin-1 isoform X1 [Camponotus floridanus]	Sinvprot:gi|751199958|ref|XP_011159621.1| PREDICTED: mitoferrin-1 isoform X1 [Solenopsis invicta]	uniprot-apis3AUP000005203:tr|A0A088AE21|A0A088AE21_APIME Uncharacterized protein OS=Apis mellifera GN=mfrn PE=3 SV=1	uniprot-cflo3AUP000000311:tr|E2A4R6|E2A4R6_CAMFO Mitoferrin-2 OS=Camponotus floridanus GN=EAG_14868 PE=3 SV=1	uniprot-sinv3AUP000006539:tr|E9I9J3|E9I9J3_SOLIN Putative uncharacterized protein (Fragment) OS=Solenopsis invicta GN=SINV_07719 PE=3 SV=1
OMA03432	Amelprot:gi|571574424|ref|XP_006563438.1| PREDICTED: glycerol-3-phosphate acyltransferase 1, mitochondrial-like isoform X2 [Apis mellifera]	Cfelprot80:comp55027_c0_seq3_2_2254	Cfloprot:gi|752868966|ref|XP_011251577.1| PREDICTED: glycerol-3-phosphate acyltransferase 1, mitochondrial isoform X1 [Camponotus floridanus]	Sinvprot:gi|751199975|ref|XP_011159710.1| PREDICTED: glycerol-3-phosphate acyltransferase 1, mitochondrial isoform X1 [Solenopsis invicta]	uniprot-apis3AUP000005203:tr|A0A088AF61|A0A088AF61_APIME Uncharacterized protein OS=Apis mellifera GN=LOC411724 PE=4 SV=1	uniprot-cflo3AUP000000311:tr|E2A4R3|E2A4R3_CAMFO Glycerol-3-phosphate acyltransferase, mitochondrial OS=Camponotus floridanus GN=EAG_14865 PE=4 SV=1	uniprot-sinv3AUP000006539:tr|E9I9J5|E9I9J5_SOLIN Putative uncharacterized protein (Fragment) OS=Solenopsis invicta GN=SINV_13626 PE=4 SV=1
OMA06418	Amelprot:gi|328789468|ref|XP_394316.3| PREDICTED: GRB2-associated-binding protein 2 [Apis mellifera]	Cfelprot80:comp63547_c0_seq2_155_1944	Cfloprot:gi|752889014|ref|XP_011262436.1| PREDICTED: protein daughter of sevenless [Camponotus floridanus]	Sinvprot:gi|751199996|ref|XP_011159852.1| PREDICTED: GRB2-associated-binding protein 1 [Solenopsis invicta]	uniprot-apis3AUP000005203:tr|A0A088AV30|A0A088AV30_APIME Uncharacterized protein OS=Apis mellifera GN=dos PE=4 SV=1	uniprot-cflo3AUP000000311:tr|E2AQY7|E2AQY7_CAMFO Protein daughter of sevenless OS=Camponotus floridanus GN=EAG_08234 PE=4 SV=1	uniprot-sinv3AUP000006539:tr|E9I9K2|E9I9K2_SOLIN Putative uncharacterized protein (Fragment) OS=Solenopsis invicta GN=SINV_14672 PE=4 SV=1
OMA06019	Amelprot:gi|328793097|ref|XP_623581.2| PREDICTED: GTP-binding protein 1-like isoform X2 [Apis mellifera]	Cfelprot80:comp66097_c0_seq13_395_2271	Cfloprot:gi|752891000|ref|XP_011263519.1| PREDICTED: GTP-binding protein 1 [Camponotus floridanus]	Sinvprot:gi|751200006|ref|XP_011159907.1| PREDICTED: GTP-binding protein 1 [Solenopsis invicta]	uniprot-apis3AUP000005203:tr|A0A087ZQ35|A0A087ZQ35_APIME Uncharacterized protein OS=Apis mellifera GN=LOC551185 PE=4 SV=1	uniprot-cflo3AUP000000311:tr|E2AT39|E2AT39_CAMFO GTP-binding protein 1 OS=Camponotus floridanus GN=EAG_05219 PE=4 SV=1	uniprot-sinv3AUP000006539:tr|E9I9K4|E9I9K4_SOLIN Putative uncharacterized protein (Fragment) OS=Solenopsis invicta GN=SINV_08756 PE=4 SV=1
OMA15825	Amelprot:gi|571523338|ref|XP_006562063.1| PREDICTED: ribosome biogenesis protein NSA2 homolog isoform X1 [Apis mellifera]	Cfelprot80:comp56458_c0_seq2_256_1029	Cfloprot:gi|752889718|ref|XP_011262822.1| PREDICTED: ribosome biogenesis protein NSA2 homolog [Camponotus floridanus]	Sinvprot:gi|751200020|ref|XP_011159981.1| PREDICTED: ribosome biogenesis protein NSA2 homolog [Solenopsis invicta]	uniprot-apis3AUP000005203:tr|A0A088AVY0|A0A088AVY0_APIME Uncharacterized protein OS=Apis mellifera GN=RpS27A PE=4 SV=1	uniprot-cflo3AUP000000311:tr|E2ARN5|E2ARN5_CAMFO Ribosome biogenesis protein NSA2-like protein OS=Camponotus floridanus GN=EAG_14983 PE=4 SV=1	uniprot-sinv3AUP000006539:tr|E9I9K7|E9I9K7_SOLIN Putative uncharacterized protein (Fragment) OS=Solenopsis invicta GN=SINV_00582 PE=4 SV=1
OMA21333	Amelprot:gi|66543659|ref|XP_394854.2| PREDICTED: 60S ribosomal protein L30 isoform 1 [Apis mellifera]	Cfelprot80:comp66723_c0_seq1_84_424	Cfloprot:gi|752889714|ref|XP_011262820.1| PREDICTED: 60S ribosomal protein L30 [Camponotus floridanus]	Sinvprot:gi|751200024|ref|XP_011160005.1| PREDICTED: 60S ribosomal protein L30 [Solenopsis invicta]	uniprot-apis3AUP000005203:tr|A0A088AHA4|A0A088AHA4_APIME Uncharacterized protein OS=Apis mellifera GN=RpL30 PE=3 SV=1	uniprot-cflo3AUP000000311:tr|E2ARN3|E2ARN3_CAMFO 60S ribosomal protein L30 OS=Camponotus floridanus GN=EAG_14981 PE=3 SV=1	uniprot-sinv3AUP000006539:tr|E9I9K9|E9I9K9_SOLIN Putative uncharacterized protein (Fragment) OS=Solenopsis invicta GN=SINV_12574 PE=3 SV=1
OMA11072	Amelprot:gi|571578495|ref|XP_006572419.1| PREDICTED: mannose-6-phosphate isomerase-like isoform X2 [Apis mellifera]	Cfelprot80:comp65081_c0_seq1_253_1353	Cfloprot:gi|752889710|ref|XP_011262818.1| PREDICTED: mannose-6-phosphate isomerase [Camponotus floridanus]	Sinvprot:gi|751200030|ref|XP_011160040.1| PREDICTED: mannose-6-phosphate isomerase isoform X1 [Solenopsis invicta]	uniprot-apis3AUP000005203:tr|A0A088AHA0|A0A088AHA0_APIME Uncharacterized protein OS=Apis mellifera GN=LOC551447 PE=3 SV=1	uniprot-cflo3AUP000000311:tr|E2ARN2|E2ARN2_CAMFO Mannose-6-phosphate isomerase OS=Camponotus floridanus GN=EAG_14980 PE=3 SV=1	uniprot-sinv3AUP000006539:tr|E9I9L0|E9I9L0_SOLIN Mannose-6-phosphate isomerase (Fragment) OS=Solenopsis invicta GN=SINV_15264 PE=3 SV=1
OMA03129	Amelprot:gi|110768799|ref|XP_624513.2| PREDICTED: alpha-aminoadipic semialdehyde synthase, mitochondrial [Apis mellifera]	Cfelprot80:comp64581_c2_seq4_150_2927	Cfloprot:gi|752874428|ref|XP_011254533.1| PREDICTED: alpha-aminoadipic semialdehyde synthase, mitochondrial [Camponotus floridanus]	Sinvprot:gi|751200064|ref|XP_011160201.1| PREDICTED: alpha-aminoadipic semialdehyde synthase, mitochondrial [Solenopsis invicta]	uniprot-apis3AUP000005203:tr|A0A088A9B9|A0A088A9B9_APIME Uncharacterized protein OS=Apis mellifera GN=LKR PE=4 SV=1	uniprot-cflo3AUP000000311:tr|E2AAL3|E2AAL3_CAMFO Alpha-aminoadipic semialdehyde synthase, mitochondrial OS=Camponotus floridanus GN=EAG_08811 PE=4 SV=1	uniprot-sinv3AUP000006539:tr|E9I9L9|E9I9L9_SOLIN Putative uncharacterized protein (Fragment) OS=Solenopsis invicta GN=SINV_80443 PE=4 SV=1
OMA03910	Amelprot:gi|110749420|ref|XP_624548.2| PREDICTED: AFG3-like protein 2-like [Apis mellifera]	Cfelprot80:comp46559_c0_seq1_202_2641	Cfloprot:gi|752874436|ref|XP_011254537.1| PREDICTED: AFG3-like protein 2 isoform X1 [Camponotus floridanus]	Sinvprot:gi|751200068|ref|XP_011160223.1| PREDICTED: AFG3-like protein 2 isoform X1 [Solenopsis invicta]	uniprot-apis3AUP000005203:tr|A0A088A5D5|A0A088A5D5_APIME Uncharacterized protein OS=Apis mellifera GN=LOC552166 PE=3 SV=1	uniprot-cflo3AUP000000311:tr|E2AAL5|E2AAL5_CAMFO AFG3-like protein 2 OS=Camponotus floridanus GN=EAG_08813 PE=3 SV=1	uniprot-sinv3AUP000006539:tr|E9I9M1|E9I9M1_SOLIN Putative uncharacterized protein (Fragment) OS=Solenopsis invicta GN=SINV_06415 PE=3 SV=1
OMA05070	Amelprot:gi|571505500|ref|XP_006570176.1| PREDICTED: solute carrier family 26 member 6-like isoform X1 [Apis mellifera]	Cfelprot80:comp64127_c0_seq3_1628_2706	Cfloprot:gi|752874442|ref|XP_011254541.1| PREDICTED: solute carrier family 26 member 10-like isoform X1 [Camponotus floridanus]	Sinvprot:gi|751200086|ref|XP_011160308.1| PREDICTED: solute carrier family 26 member 6 isoform X3 [Solenopsis invicta]	uniprot-apis3AUP000005203:tr|A0A088A5D9|A0A088A5D9_APIME Uncharacterized protein OS=Apis mellifera GN=LOC100576446 PE=3 SV=1	uniprot-cflo3AUP000000311:tr|E2AAM0|E2AAM0_CAMFO Prestin OS=Camponotus floridanus GN=EAG_08818 PE=3 SV=1	uniprot-sinv3AUP000006539:tr|E9I9M5|E9I9M5_SOLIN Putative uncharacterized protein (Fragment) OS=Solenopsis invicta GN=SINV_08403 PE=3 SV=1
OMA11995	Amelprot:gi|66500087|ref|XP_396685.2| PREDICTED: vacuolar protein sorting-associated protein 26B [Apis mellifera]	Cfelprot80:comp46415_c0_seq1_149_1346	Cfloprot:gi|752875222|ref|XP_011254955.1| PREDICTED: vacuolar protein sorting-associated protein 26B-like [Camponotus floridanus]	Sinvprot:gi|751200106|ref|XP_011160405.1| PREDICTED: vacuolar protein sorting-associated protein 26B-like isoform X1 [Solenopsis invicta]	uniprot-apis3AUP000005203:tr|A0A088A5E3|A0A088A5E3_APIME Uncharacterized protein OS=Apis mellifera GN=Vps26 PE=4 SV=1	uniprot-cflo3AUP000000311:tr|E2ABG1|E2ABG1_CAMFO Vacuolar protein sorting-associated protein 26 OS=Camponotus floridanus GN=EAG_12371 PE=4 SV=1	uniprot-sinv3AUP000006539:tr|E9I9N4|E9I9N4_SOLIN Putative uncharacterized protein (Fragment) OS=Solenopsis invicta GN=SINV_02964 PE=4 SV=1
OMA20358	Amelprot:gi|571505333|ref|XP_006570155.1| PREDICTED: uncharacterized protein KIAA1143 homolog [Apis mellifera]	Cfelprot80:comp55425_c0_seq1_29_445	Cfloprot:gi|752875220|ref|XP_011254954.1| PREDICTED: uncharacterized protein KIAA1143 homolog [Camponotus floridanus]	Sinvprot:gi|751200110|ref|XP_011160423.1| PREDICTED: uncharacterized protein KIAA1143 homolog [Solenopsis invicta]	uniprot-apis3AUP000005203:tr|A0A088A5D1|A0A088A5D1_APIME Uncharacterized protein OS=Apis mellifera GN=LOC100577765 PE=4 SV=1	uniprot-cflo3AUP000000311:tr|E2ABG0|E2ABG0_CAMFO Uncharacterized protein KIAA1143-like protein OS=Camponotus floridanus GN=EAG_12370 PE=4 SV=1	uniprot-sinv3AUP000006539:tr|E9I9N5|E9I9N5_SOLIN Putative uncharacterized protein (Fragment) OS=Solenopsis invicta GN=SINV_08500 PE=4 SV=1
OMA13455	Amelprot:gi|571505416|ref|XP_006570172.1| PREDICTED: eukaryotic translation initiation factor 3 subunit I isoform X1 [Apis mellifera]	Cfelprot80:comp54388_c0_seq1_86_310	Cfloprot:gi|752875204|ref|XP_011254946.1| PREDICTED: eukaryotic translation initiation factor 3 subunit I [Camponotus floridanus]	Sinvprot:gi|751200114|ref|XP_011160448.1| PREDICTED: eukaryotic translation initiation factor 3 subunit I [Solenopsis invicta]	uniprot-apis3AUP000005203:tr|A0A088A549|A0A088A549_APIME Eukaryotic translation initiation factor 3 subunit I OS=Apis mellifera GN=Trip1 PE=3 SV=1	uniprot-cflo3AUP000000311:tr|E2ABF7|E2ABF7_CAMFO Eukaryotic translation initiation factor 3 subunit I OS=Camponotus floridanus GN=EAG_12367 PE=3 SV=1	uniprot-sinv3AUP000006539:tr|E9I9N8|E9I9N8_SOLIN Eukaryotic translation initiation factor 3 subunit I (Fragment) OS=Solenopsis invicta GN=SINV_00160 PE=3 SV=1
OMA04736	Amelprot:gi|66535555|ref|XP_624292.1| PREDICTED: DNA replication licensing factor Mcm5 isoform X3 [Apis mellifera]	Cfelprot80:comp46157_c0_seq1_1927_2378	Cfloprot:gi|752871588|ref|XP_011252998.1| PREDICTED: DNA replication licensing factor Mcm5 [Camponotus floridanus]	Sinvprot:gi|751200116|ref|XP_011160464.1| PREDICTED: DNA replication licensing factor Mcm5 [Solenopsis invicta]	uniprot-apis3AUP000005203:tr|A0A088A0G3|A0A088A0G3_APIME DNA helicase OS=Apis mellifera GN=Mcm5 PE=3 SV=1	uniprot-cflo3AUP000000311:tr|E2A7N9|E2A7N9_CAMFO DNA helicase OS=Camponotus floridanus GN=EAG_08178 PE=3 SV=1	uniprot-sinv3AUP000006539:tr|E9I9N9|E9I9N9_SOLIN Putative uncharacterized protein (Fragment) OS=Solenopsis invicta GN=SINV_14260 PE=3 SV=1
OMA08285	Amelprot:gi|328787768|ref|XP_394678.3| PREDICTED: WD repeat-containing protein 37-like isoform X4 [Apis mellifera]	Cfelprot80:comp62002_c0_seq1_489_1910	Cfloprot:gi|752871570|ref|XP_011252989.1| PREDICTED: WD repeat-containing protein 37 [Camponotus floridanus]	Sinvprot:gi|751200128|ref|XP_011160539.1| PREDICTED: WD repeat-containing protein 37 [Solenopsis invicta]	uniprot-apis3AUP000005203:tr|A0A087ZZ65|A0A087ZZ65_APIME Uncharacterized protein OS=Apis mellifera GN=LOC411204 PE=4 SV=1	uniprot-cflo3AUP000000311:tr|E2A7N8|E2A7N8_CAMFO WD repeat-containing protein 37 OS=Camponotus floridanus GN=EAG_08177 PE=4 SV=1	uniprot-sinv3AUP000006539:tr|E9I9P0|E9I9P0_SOLIN Putative uncharacterized protein (Fragment) OS=Solenopsis invicta GN=SINV_12250 PE=4 SV=1
OMA13642	Amelprot:gi|66506853|ref|XP_394676.2| PREDICTED: aldose reductase-like [Apis mellifera]	Cfelprot80:comp67018_c0_seq1_394_1267	Cfloprot:gi|752871584|ref|XP_011252996.1| PREDICTED: alcohol dehydrogenase [NADP(+)]-like [Camponotus floridanus]	Sinvprot:gi|751200124|ref|XP_011160513.1| PREDICTED: 1,5-anhydro-D-fructose reductase [Solenopsis invicta]	uniprot-apis3AUP000005203:tr|A0A087ZZ66|A0A087ZZ66_APIME Uncharacterized protein OS=Apis mellifera GN=LOC411202 PE=4 SV=1	uniprot-cflo3AUP000000311:tr|E2A7N6|E2A7N6_CAMFO Alcohol dehydrogenase [NADP+] OS=Camponotus floridanus GN=EAG_08175 PE=4 SV=1	uniprot-sinv3AUP000006539:tr|E9I9P2|E9I9P2_SOLIN Putative uncharacterized protein (Fragment) OS=Solenopsis invicta GN=SINV_08905 PE=4 SV=1
OMA09951	Amelprot:gi|66524128|ref|XP_392818.2| PREDICTED: adenylosuccinate synthetase-like [Apis mellifera]	Cfelprot80:comp35753_c0_seq1_1_1421	Cfloprot:gi|752871566|ref|XP_011252987.1| PREDICTED: adenylosuccinate synthetase [Camponotus floridanus]	Sinvprot:gi|751200130|ref|XP_011160549.1| PREDICTED: adenylosuccinate synthetase [Solenopsis invicta]	uniprot-apis3AUP000005203:tr|A0A087ZXT6|A0A087ZXT6_APIME Adenylosuccinate synthetase OS=Apis mellifera GN=LOC409299 PE=3 SV=1	uniprot-cflo3AUP000000311:tr|E2A7N5|E2A7N5_CAMFO Adenylosuccinate synthetase OS=Camponotus floridanus GN=EAG_08174 PE=3 SV=1	uniprot-sinv3AUP000006539:tr|E9I9P3|E9I9P3_SOLIN Adenylosuccinate synthetase (Fragment) OS=Solenopsis invicta GN=SINV_00191 PE=3 SV=1
OMA08904	Amelprot:gi|571577487|ref|XP_006572082.1| PREDICTED: acidic mammalian chitinase isoform X1 [Apis mellifera]	Cfelprot80:comp60500_c0_seq1_478_1861	Cfloprot:gi|752871558|ref|XP_011252982.1| PREDICTED: chitinase-3-like protein 2 [Camponotus floridanus]	Sinvprot:gi|751200136|ref|XP_011160586.1| PREDICTED: chitinase-3-like protein 2 [Solenopsis invicta]	uniprot-apis3AUP000005203:tr|A0A088A858|A0A088A858_APIME Uncharacterized protein OS=Apis mellifera GN=Cht11 PE=3 SV=1	uniprot-cflo3AUP000000311:tr|E2A7N2|E2A7N2_CAMFO Acidic mammalian chitinase OS=Camponotus floridanus GN=EAG_08171 PE=3 SV=1	uniprot-sinv3AUP000006539:tr|E9I9P7|E9I9P7_SOLIN Putative uncharacterized protein (Fragment) OS=Solenopsis invicta GN=SINV_08968 PE=3 SV=1
OMA00984	Amelprot:gi|571577152|ref|XP_006571962.1| PREDICTED: trafficking protein particle complex subunit 8-like isoform X1 [Apis mellifera]	Cfelprot80:comp66093_c0_seq5_191_4496	Cfloprot:gi|752881398|ref|XP_011258304.1| PREDICTED: trafficking protein particle complex subunit 8 isoform X1 [Camponotus floridanus]	Sinvprot:gi|751200147|ref|XP_011160638.1| PREDICTED: trafficking protein particle complex subunit 8 isoform X2 [Solenopsis invicta]	uniprot-apis3AUP000005203:tr|A0A087ZQ54|A0A087ZQ54_APIME Uncharacterized protein OS=Apis mellifera GN=LOC412104 PE=4 SV=1	uniprot-cflo3AUP000000311:tr|E2AHV2|E2AHV2_CAMFO Protein TRS85-like protein OS=Camponotus floridanus GN=EAG_15622 PE=4 SV=1	uniprot-sinv3AUP000006539:tr|E9I9P9|E9I9P9_SOLIN Putative uncharacterized protein (Fragment) OS=Solenopsis invicta GN=SINV_15297 PE=4 SV=1
OMA17240	Amelprot:gi|571577143|ref|XP_006571958.1| PREDICTED: 60S ribosomal protein L10 isoform X1 [Apis mellifera]	Cfelprot80:comp66649_c0_seq1_165_806	Cfloprot:gi|752881402|ref|XP_011258306.1| PREDICTED: 60S ribosomal protein L10 [Camponotus floridanus]	Sinvprot:gi|751200151|ref|XP_011160655.1| PREDICTED: 60S ribosomal protein L10 [Solenopsis invicta]	uniprot-apis3AUP000005203:tr|A0A087ZQ36|A0A087ZQ36_APIME Uncharacterized protein OS=Apis mellifera GN=RpL10 PE=4 SV=1	uniprot-cflo3AUP000000311:tr|E2AHV3|E2AHV3_CAMFO 60S ribosomal protein L10 OS=Camponotus floridanus GN=EAG_15623 PE=4 SV=1	uniprot-sinv3AUP000006539:tr|E9I9Q0|E9I9Q0_SOLIN Putative uncharacterized protein (Fragment) OS=Solenopsis invicta GN=SINV_12478 PE=4 SV=1
OMA07203	Amelprot:gi|571577139|ref|XP_006571957.1| PREDICTED: RING finger protein 157-like isoform X2 [Apis mellifera]	Cfelprot80:comp64850_c0_seq1_824_2267	Cfloprot:gi|752881404|ref|XP_011258307.1| PREDICTED: RING finger protein 157 [Camponotus floridanus]	Sinvprot:gi|751200153|ref|XP_011160665.1| PREDICTED: RING finger protein 157 [Solenopsis invicta]	uniprot-apis3AUP000005203:tr|A0A087ZQ52|A0A087ZQ52_APIME Uncharacterized protein OS=Apis mellifera GN=LOC552182 PE=4 SV=1	uniprot-cflo3AUP000000311:tr|E2AHV4|E2AHV4_CAMFO RING finger protein 157 OS=Camponotus floridanus GN=EAG_15624 PE=4 SV=1	uniprot-sinv3AUP000006539:tr|E9I9Q1|E9I9Q1_SOLIN Putative uncharacterized protein (Fragment) OS=Solenopsis invicta GN=SINV_12589 PE=4 SV=1
OMA02313	Amelprot:gi|571552520|ref|XP_006562428.1| PREDICTED: gamma-tubulin complex component 5-like, partial [Apis mellifera]	Cfelprot80:comp64837_c1_seq2_700_3628	Cfloprot:gi|752887610|ref|XP_011261684.1| PREDICTED: gamma-tubulin complex component 5 isoform X1 [Camponotus floridanus]	Sinvprot:gi|751200155|ref|XP_011160676.1| PREDICTED: gamma-tubulin complex component 5 [Solenopsis invicta]	uniprot-apis3AUP000005203:tr|A0A088ASE4|A0A088ASE4_APIME Uncharacterized protein OS=Apis mellifera GN=LOC725685 PE=4 SV=1	uniprot-cflo3AUP000000311:tr|E2APE3|E2APE3_CAMFO Gamma-tubulin complex component 5 (Fragment) OS=Camponotus floridanus GN=EAG_09668 PE=4 SV=1	uniprot-sinv3AUP000006539:tr|E9I9Q2|E9I9Q2_SOLIN Putative uncharacterized protein (Fragment) OS=Solenopsis invicta GN=SINV_14859 PE=4 SV=1
OMA11090	Amelprot:gi|571552476|ref|XP_006562421.1| PREDICTED: ras-related GTP-binding protein D-like isoform X2 [Apis mellifera]	Cfelprot80:comp43321_c0_seq1_204_1377	Cfloprot:gi|752887606|ref|XP_011261682.1| PREDICTED: ras-related GTP-binding protein C [Camponotus floridanus]	Sinvprot:gi|751200157|ref|XP_011160708.1| PREDICTED: ras-related GTP-binding protein C [Solenopsis invicta]	uniprot-apis3AUP000005203:tr|A0A088ASD0|A0A088ASD0_APIME Uncharacterized protein OS=Apis mellifera GN=LOC551980 PE=4 SV=1	uniprot-cflo3AUP000000311:tr|E2APE4|E2APE4_CAMFO Ras-related GTP-binding protein D OS=Camponotus floridanus GN=EAG_09669 PE=4 SV=1	uniprot-sinv3AUP000006539:tr|E9I9Q3|E9I9Q3_SOLIN Putative uncharacterized protein (Fragment) OS=Solenopsis invicta GN=SINV_10843 PE=4 SV=1
OMA04596	Amelprot:gi|328782716|ref|XP_623216.3| PREDICTED: striatin-3 isoformX2 [Apis mellifera]	Cfelprot80:comp67168_c0_seq1_694_2885	Cfloprot:gi|752887840|ref|XP_011261812.1| PREDICTED: striatin-3 [Camponotus floridanus]	Sinvprot:gi|751200181|ref|XP_011160828.1| PREDICTED: striatin-3 isoform X1 [Solenopsis invicta]	uniprot-apis3AUP000005203:tr|A0A088AAE5|A0A088AAE5_APIME Uncharacterized protein OS=Apis mellifera GN=Cka PE=4 SV=1	uniprot-cflo3AUP000000311:tr|E2APP1|E2APP1_CAMFO Striatin-3 OS=Camponotus floridanus GN=EAG_13101 PE=4 SV=1	uniprot-sinv3AUP000006539:tr|E9I9R1|E9I9R1_SOLIN Putative uncharacterized protein (Fragment) OS=Solenopsis invicta GN=SINV_06980 PE=4 SV=1
OMA09202	Amelprot:gi|571552883|ref|XP_006562891.1| PREDICTED: probable E3 ubiquitin-protein ligase RNF144A-like isoform X1 [Apis mellifera]	Cfelprot80:comp53671_c0_seq1_712_1918	Cfloprot:gi|752887850|ref|XP_011261818.1| PREDICTED: probable E3 ubiquitin-protein ligase RNF144A [Camponotus floridanus]	Sinvprot:gi|751200199|ref|XP_011160910.1| PREDICTED: probable E3 ubiquitin-protein ligase RNF144A [Solenopsis invicta]	uniprot-apis3AUP000005203:tr|A0A088AAJ4|A0A088AAJ4_APIME Uncharacterized protein OS=Apis mellifera GN=LOC410225 PE=4 SV=1	uniprot-cflo3AUP000000311:tr|E2APP3|E2APP3_CAMFO Probable E3 ubiquitin-protein ligase RNF144A OS=Camponotus floridanus GN=EAG_13103 PE=4 SV=1	uniprot-sinv3AUP000006539:tr|E9I9R3|E9I9R3_SOLIN Putative uncharacterized protein (Fragment) OS=Solenopsis invicta GN=SINV_12101 PE=4 SV=1
OMA13300	Amelprot:gi|328782724|ref|XP_393711.3| PREDICTED: protein kinase DC2 isoform X2 [Apis mellifera]	Cfelprot80:comp67554_c0_seq1_1146_2046	Cfloprot:gi|752887869|ref|XP_011261827.1| PREDICTED: cAMP-dependent protein kinase catalytic subunit PRKX [Camponotus floridanus]	Sinvprot:gi|751200208|ref|XP_011160961.1| PREDICTED: cAMP-dependent protein kinase catalytic subunit PRKX [Solenopsis invicta]	uniprot-apis3AUP000005203:tr|A0A088AAE1|A0A088AAE1_APIME Uncharacterized protein OS=Apis mellifera GN=Pka-C3 PE=4 SV=1	uniprot-cflo3AUP000000311:tr|E2APP8|E2APP8_CAMFO Protein kinase DC2 OS=Camponotus floridanus GN=EAG_13108 PE=4 SV=1	uniprot-sinv3AUP000006539:tr|E9I9R9|E9I9R9_SOLIN Putative uncharacterized protein (Fragment) OS=Solenopsis invicta GN=SINV_00534 PE=4 SV=1
OMA02508	Amelprot:gi|571551317|ref|XP_006558290.1| PREDICTED: netrin receptor UNC5C isoform X1 [Apis mellifera]	Cfelprot80:comp65751_c1_seq2_629_3570	Cfloprot:gi|752887871|ref|XP_011261828.1| PREDICTED: netrin receptor UNC5C-like isoform X1 [Camponotus floridanus]	Sinvprot:gi|751200211|ref|XP_011160977.1| PREDICTED: netrin receptor UNC5C-like [Solenopsis invicta]	uniprot-apis3AUP000005203:tr|A0A088A971|A0A088A971_APIME Uncharacterized protein OS=Apis mellifera GN=unc5-1 PE=4 SV=1	uniprot-cflo3AUP000000311:tr|E2APQ2|E2APQ2_CAMFO Netrin receptor UNC5C OS=Camponotus floridanus GN=EAG_13112 PE=4 SV=1	uniprot-sinv3AUP000006539:tr|E9I9S1|E9I9S1_SOLIN Putative uncharacterized protein (Fragment) OS=Solenopsis invicta GN=SINV_16042 PE=4 SV=1
OMA08241	Amelprot:gi|328776500|ref|XP_393727.2| PREDICTED: prothrombin [Apis mellifera]	Cfelprot80:comp62643_c1_seq1_2102_3447	Cfloprot:gi|752867298|ref|XP_011250670.1| PREDICTED: coagulation factor VII [Camponotus floridanus]	Sinvprot:gi|751200225|ref|XP_011161039.1| PREDICTED: prothrombin isoform X2 [Solenopsis invicta]	uniprot-apis3AUP000005203:tr|A0A088AWA3|A0A088AWA3_APIME Uncharacterized protein OS=Apis mellifera GN=SP38 PE=3 SV=1	uniprot-cflo3AUP000000311:tr|E2A336|E2A336_CAMFO Coagulation factor X OS=Camponotus floridanus GN=EAG_15980 PE=3 SV=1	uniprot-sinv3AUP000006539:tr|E9I9S7|E9I9S7_SOLIN Putative uncharacterized protein (Fragment) OS=Solenopsis invicta GN=SINV_12968 PE=3 SV=1
OMA11009	Amelprot:gi|571551308|ref|XP_006557859.1| PREDICTED: uncharacterized protein LOC724498 isoform X2 [Apis mellifera]	Cfelprot80:comp59471_c1_seq1_1066_2291	Cfloprot:gi|752867302|ref|XP_011250673.1| PREDICTED: uncharacterized protein LOC105247911 isoform X1 [Camponotus floridanus]	Sinvprot:gi|751200235|ref|XP_011161105.1| PREDICTED: uncharacterized protein LOC105196725 [Solenopsis invicta]	uniprot-apis3AUP000005203:tr|A0A088AWA1|A0A088AWA1_APIME Uncharacterized protein OS=Apis mellifera GN=LOC724498 PE=4 SV=1	uniprot-cflo3AUP000000311:tr|E2A339|E2A339_CAMFO Putative uncharacterized protein OS=Camponotus floridanus GN=EAG_15983 PE=4 SV=1	uniprot-sinv3AUP000006539:tr|E9I9S8|E9I9S8_SOLIN Putative uncharacterized protein (Fragment) OS=Solenopsis invicta GN=SINV_08436 PE=4 SV=1
OMA03314	Amelprot:gi|571551261|ref|XP_006557327.1| PREDICTED: bifunctional heparan sulfate N-deacetylase/N-sulfotransferase-like isoform X3 [Apis mellifera]	Cfelprot80:comp63505_c0_seq2_1790_4444	Cfloprot:gi|752867308|ref|XP_011250676.1| PREDICTED: bifunctional heparan sulfate N-deacetylase/N-sulfotransferase [Camponotus floridanus]	Sinvprot:gi|751200248|ref|XP_011161215.1| PREDICTED: bifunctional heparan sulfate N-deacetylase/N-sulfotransferase [Solenopsis invicta]	uniprot-apis3AUP000005203:tr|A0A087ZWU1|A0A087ZWU1_APIME Uncharacterized protein OS=Apis mellifera GN=LOC413242 PE=4 SV=1	uniprot-cflo3AUP000000311:tr|E2A347|E2A347_CAMFO Bifunctional heparan sulfate N-deacetylase/N-sulfotransferase (Fragment) OS=Camponotus floridanus GN=EAG_15991 PE=4 SV=1	uniprot-sinv3AUP000006539:tr|E9I9T1|E9I9T1_SOLIN Putative uncharacterized protein (Fragment) OS=Solenopsis invicta GN=SINV_13671 PE=4 SV=1
OMA12442	Amelprot:gi|571577628|ref|XP_006572130.1| PREDICTED: calcium uniporter protein, mitochondrial-like isoform X3 [Apis mellifera]	Cfelprot80:comp64632_c0_seq1_748_1422	Cfloprot:gi|752867316|ref|XP_011250680.1| PREDICTED: calcium uniporter protein, mitochondrial [Camponotus floridanus]	Sinvprot:gi|751200250|ref|XP_011161228.1| PREDICTED: calcium uniporter protein, mitochondrial [Solenopsis invicta]	uniprot-apis3AUP000005203:tr|A0A088AW52|A0A088AW52_APIME Uncharacterized protein OS=Apis mellifera GN=LOC725974 PE=4 SV=1	uniprot-cflo3AUP000000311:tr|E2A350|E2A350_CAMFO Coiled-coil domain-containing protein 109A OS=Camponotus floridanus GN=EAG_15994 PE=4 SV=1	uniprot-sinv3AUP000006539:tr|E9I9T4|E9I9T4_SOLIN Putative uncharacterized protein (Fragment) OS=Solenopsis invicta GN=SINV_14624 PE=4 SV=1
OMA14135	Amelprot:gi|571552942|ref|XP_006562903.1| PREDICTED: leukocyte receptor cluster member 1-like isoform X2 [Apis mellifera]	Cfelprot80:comp32485_c0_seq1_166_933	Cfloprot:gi|752867322|ref|XP_011250683.1| PREDICTED: leukocyte receptor cluster member 1 homolog [Camponotus floridanus]	Sinvprot:gi|751200256|ref|XP_011161263.1| PREDICTED: leukocyte receptor cluster member 1 homolog [Solenopsis invicta]	uniprot-apis3AUP000005203:tr|A0A088AAD8|A0A088AAD8_APIME Uncharacterized protein OS=Apis mellifera GN=LOC410238 PE=4 SV=1	uniprot-cflo3AUP000000311:tr|E2A353|E2A353_CAMFO Leukocyte receptor cluster member 1 OS=Camponotus floridanus GN=EAG_15997 PE=4 SV=1	uniprot-sinv3AUP000006539:tr|E9I9T6|E9I9T6_SOLIN Putative uncharacterized protein (Fragment) OS=Solenopsis invicta GN=SINV_07421 PE=4 SV=1
OMA04982	Amelprot:gi|328782580|ref|XP_001121833.2| PREDICTED: zinc finger protein 454-like [Apis mellifera]	Cfelprot80:comp46274_c0_seq1_144_2192	Cfloprot:gi|752890899|ref|XP_011263463.1| PREDICTED: zinc finger protein 572-like [Camponotus floridanus]	Sinvprot:gi|751200262|ref|XP_011161289.1| PREDICTED: zinc finger protein 569-like isoform X1 [Solenopsis invicta]	uniprot-apis3AUP000005203:tr|A0A088AAD9|A0A088AAD9_APIME Uncharacterized protein OS=Apis mellifera GN=LOC726063 PE=4 SV=1	uniprot-cflo3AUP000000311:tr|E2ASZ0|E2ASZ0_CAMFO Zinc finger protein 112-like protein (Fragment) OS=Camponotus floridanus GN=EAG_04880 PE=4 SV=1	uniprot-sinv3AUP000006539:tr|E9I9T7|E9I9T7_SOLIN Putative uncharacterized protein (Fragment) OS=Solenopsis invicta GN=SINV_04694 PE=4 SV=1
OMA01772	Amelprot:gi|571552949|ref|XP_006562904.1| PREDICTED: trimethylguanosine synthase-like isoform X1 [Apis mellifera]	Cfelprot80:comp45467_c0_seq1_303_3340	Cfloprot:gi|752890903|ref|XP_011263465.1| PREDICTED: trimethylguanosine synthase [Camponotus floridanus]	Sinvprot:gi|751200274|ref|XP_011161342.1| PREDICTED: trimethylguanosine synthase [Solenopsis invicta]	uniprot-apis3AUP000005203:tr|A0A088AAJ7|A0A088AAJ7_APIME Uncharacterized protein OS=Apis mellifera GN=LOC410239 PE=4 SV=1	uniprot-cflo3AUP000000311:tr|E2ASZ1|E2ASZ1_CAMFO Trimethylguanosine synthase-like protein OS=Camponotus floridanus GN=EAG_04881 PE=4 SV=1	uniprot-sinv3AUP000006539:tr|E9I9T8|E9I9T8_SOLIN Putative uncharacterized protein (Fragment) OS=Solenopsis invicta GN=SINV_12301 PE=4 SV=1
OMA09974	Amelprot:gi|571551364|ref|XP_006558409.1| PREDICTED: nuclear receptor subfamily 1 group D member 2 isoform X1 [Apis mellifera]	Cfelprot80:comp65168_c0_seq1_1739_2140	Cfloprot:gi|752890905|ref|XP_011263466.1| PREDICTED: zygotic gap protein knirps-like [Camponotus floridanus]	Sinvprot:gi|751200272|ref|XP_011161334.1| PREDICTED: uncharacterized protein LOC105196879 [Solenopsis invicta]	uniprot-apis3AUP000005203:tr|A0A088AL81|A0A088AL81_APIME Uncharacterized protein OS=Apis mellifera PE=3 SV=1	uniprot-cflo3AUP000000311:tr|E2ASZ2|E2ASZ2_CAMFO Protein embryonic gonad OS=Camponotus floridanus GN=EAG_04882 PE=3 SV=1	uniprot-sinv3AUP000006539:tr|E9I9T9|E9I9T9_SOLIN Putative uncharacterized protein (Fragment) OS=Solenopsis invicta GN=SINV_02652 PE=3 SV=1
OMA08372	Amelprot:gi|571551529|ref|XP_006559126.1| PREDICTED: uncharacterized protein LOC412476 isoform X1 [Apis mellifera]	Cfelprot80:comp63738_c1_seq1_638_1226	Cfloprot:gi|752890921|ref|XP_011263475.1| PREDICTED: uncharacterized protein LOC105255720 isoform X1 [Camponotus floridanus]	Sinvprot:gi|751200288|ref|XP_011161431.1| PREDICTED: uncharacterized protein LOC105196960 isoform X1 [Solenopsis invicta]	uniprot-apis3AUP000005203:tr|A0A088ABD3|A0A088ABD3_APIME Uncharacterized protein OS=Apis mellifera GN=LOC412476 PE=4 SV=1	uniprot-cflo3AUP000000311:tr|E2ASZ7|E2ASZ7_CAMFO BTB/POZ domain-containing protein 9 OS=Camponotus floridanus GN=EAG_04887 PE=4 SV=1	uniprot-sinv3AUP000006539:tr|E9I9U3|E9I9U3_SOLIN Putative uncharacterized protein (Fragment) OS=Solenopsis invicta GN=SINV_02639 PE=4 SV=1
OMA02014	Amelprot:gi|571551614|ref|XP_006559285.1| PREDICTED: SNF-related serine/threonine-protein kinase-like [Apis mellifera]	Cfelprot80:comp62346_c1_seq2_429_3689	Cfloprot:gi|752890931|ref|XP_011263480.1| PREDICTED: probable serine/threonine-protein kinase DDB_G0277165 [Camponotus floridanus]	Sinvprot:gi|751200298|ref|XP_011161486.1| PREDICTED: serine/threonine-protein kinase par-1 isoform X1 [Solenopsis invicta]	uniprot-apis3AUP000005203:tr|A0A088APN8|A0A088APN8_APIME Uncharacterized protein OS=Apis mellifera GN=LOC413510 PE=4 SV=1	uniprot-cflo3AUP000000311:tr|E2AT02|E2AT02_CAMFO SNF-related serine/threonine-protein kinase OS=Camponotus floridanus GN=EAG_04892 PE=4 SV=1	uniprot-sinv3AUP000006539:tr|E9I9U8|E9I9U8_SOLIN Putative uncharacterized protein (Fragment) OS=Solenopsis invicta GN=SINV_03097 PE=4 SV=1
OMA02279	Amelprot:gi|328779129|ref|XP_391857.3| PREDICTED: sodium/hydrogen exchanger 3 isoform X2 [Apis mellifera]	Cfelprot80:comp65930_c0_seq3_1416_4272	Cfloprot:gi|752890959|ref|XP_011263496.1| PREDICTED: sodium/hydrogen exchanger 3 isoform X2 [Camponotus floridanus]	Sinvprot:gi|751200312|ref|XP_011161548.1| PREDICTED: probable Na(+)/H(+) antiporter nhx-9 isoform X1 [Solenopsis invicta]	uniprot-apis3AUP000005203:tr|A0A087ZVR0|A0A087ZVR0_APIME Sodium/hydrogen exchanger OS=Apis mellifera GN=Nhe2 PE=3 SV=1	uniprot-cflo3AUP000000311:tr|E2AT05|E2AT05_CAMFO Sodium/hydrogen exchanger OS=Camponotus floridanus GN=EAG_04895 PE=3 SV=1	uniprot-sinv3AUP000006539:tr|E9I9V3|E9I9V3_SOLIN Sodium/hydrogen exchanger (Fragment) OS=Solenopsis invicta GN=SINV_10800 PE=3 SV=1
OMA07368	Amelprot:gi|66518332|ref|XP_391856.2| PREDICTED: uridine-cytidine kinase-like 1-like isoform 1 [Apis mellifera]	Cfelprot80:comp57574_c0_seq2_924_2528	Cfloprot:gi|752890949|ref|XP_011263490.1| PREDICTED: uridine-cytidine kinase-like 1 isoform X1 [Camponotus floridanus]	Sinvprot:gi|751200327|ref|XP_011161612.1| PREDICTED: uridine-cytidine kinase-like 1 [Solenopsis invicta]	uniprot-apis3AUP000005203:tr|A0A087ZVQ9|A0A087ZVQ9_APIME Uridine kinase OS=Apis mellifera PE=3 SV=1	uniprot-cflo3AUP000000311:tr|E2AT07|E2AT07_CAMFO Uridine kinase OS=Camponotus floridanus GN=EAG_04897 PE=3 SV=1	uniprot-sinv3AUP000006539:tr|E9I9V6|E9I9V6_SOLIN Uridine kinase (Fragment) OS=Solenopsis invicta GN=SINV_06216 PE=3 SV=1
OMA13434	Amelprot:gi|48097206|ref|XP_391854.1| PREDICTED: protein lifeguard 1-like isoformX1 [Apis mellifera]	Cfelprot80:comp58989_c0_seq4_927_1782	Cfloprot:gi|752890971|ref|XP_011263503.1| PREDICTED: protein lifeguard 3 isoform X1 [Camponotus floridanus]	Sinvprot:gi|751200333|ref|XP_011161649.1| PREDICTED: protein lifeguard 1 isoform X1 [Solenopsis invicta]	uniprot-apis3AUP000005203:tr|A0A087ZVQ8|A0A087ZVQ8_APIME Uncharacterized protein OS=Apis mellifera GN=LOC408303 PE=4 SV=1	uniprot-cflo3AUP000000311:tr|E2AT09|E2AT09_CAMFO Glutamate [NMDA] receptor-associated protein 1 OS=Camponotus floridanus GN=EAG_04899 PE=4 SV=1	uniprot-sinv3AUP000006539:tr|E9I9V8|E9I9V8_SOLIN Putative uncharacterized protein (Fragment) OS=Solenopsis invicta GN=SINV_04200 PE=4 SV=1
OMA05158	Amelprot:gi|328779134|ref|XP_003249595.1| PREDICTED: cirhin-like [Apis mellifera]	Cfelprot80:comp59334_c0_seq1_345_2366	Cfloprot:gi|752890965|ref|XP_011263499.1| PREDICTED: cirhin [Camponotus floridanus]	Sinvprot:gi|751200345|ref|XP_011161695.1| PREDICTED: cirhin [Solenopsis invicta]	uniprot-apis3AUP000005203:tr|A0A087ZVR3|A0A087ZVR3_APIME Uncharacterized protein OS=Apis mellifera GN=LOC724542 PE=4 SV=1	uniprot-cflo3AUP000000311:tr|E2AT10|E2AT10_CAMFO Cirhin OS=Camponotus floridanus GN=EAG_04900 PE=4 SV=1	uniprot-sinv3AUP000006539:tr|E9I9V9|E9I9V9_SOLIN Putative uncharacterized protein (Fragment) OS=Solenopsis invicta GN=SINV_03216 PE=4 SV=1
OMA15475	Amelprot:gi|110759922|ref|XP_001120574.1| PREDICTED: oxidative stress-responsive serine-rich protein 1-like isoform 1 [Apis mellifera]	Cfelprot80:comp67352_c0_seq1_346_1209	Cfloprot:gi|752880085|ref|XP_011257594.1| PREDICTED: oxidative stress-responsive serine-rich protein 1 [Camponotus floridanus]	Sinvprot:gi|751200353|ref|XP_011161741.1| PREDICTED: oxidative stress-responsive serine-rich protein 1 [Solenopsis invicta]	uniprot-apis3AUP000005203:tr|A0A088A507|A0A088A507_APIME Uncharacterized protein OS=Apis mellifera GN=LOC724683 PE=4 SV=1	uniprot-cflo3AUP000000311:tr|E2AGB1|E2AGB1_CAMFO Uncharacterized protein C20orf111-like protein OS=Camponotus floridanus GN=EAG_16284 PE=4 SV=1	uniprot-sinv3AUP000006539:tr|E9I9W2|E9I9W2_SOLIN Putative uncharacterized protein (Fragment) OS=Solenopsis invicta GN=SINV_04695 PE=4 SV=1
OMA13931	Amelprot:gi|571551765|ref|XP_006560169.1| PREDICTED: cytochrome c1, heme protein, mitochondrial isoform X1 [Apis mellifera]	Cfelprot80:comp66908_c0_seq1_239_1140	Cfloprot:gi|752880093|ref|XP_011257598.1| PREDICTED: cytochrome c1, heme protein, mitochondrial [Camponotus floridanus]	Sinvprot:gi|751200363|ref|XP_011161798.1| PREDICTED: cytochrome c1, heme protein, mitochondrial [Solenopsis invicta]	uniprot-apis3AUP000005203:tr|A0A088A503|A0A088A503_APIME Uncharacterized protein OS=Apis mellifera GN=Cyc1 PE=4 SV=1	uniprot-cflo3AUP000000311:tr|E2AGB4|E2AGB4_CAMFO Cytochrome c1, heme protein, mitochondrial OS=Camponotus floridanus GN=EAG_16287 PE=4 SV=1	uniprot-sinv3AUP000006539:tr|E9I9W5|E9I9W5_SOLIN Putative uncharacterized protein (Fragment) OS=Solenopsis invicta GN=SINV_00286 PE=4 SV=1
OMA08191	Amelprot:gi|328779321|ref|XP_393502.3| PREDICTED: protein LSM14 homolog A isoform X2 [Apis mellifera]	Cfelprot80:comp37600_c0_seq1_3_237	Cfloprot:gi|752870958|ref|XP_011252657.1| PREDICTED: protein LSM14 homolog A isoform X2 [Camponotus floridanus]	Sinvprot:gi|751200373|ref|XP_011161848.1| PREDICTED: protein LSM14 homolog A [Solenopsis invicta]	uniprot-apis3AUP000005203:tr|A0A088A510|A0A088A510_APIME Uncharacterized protein OS=Apis mellifera GN=tral PE=4 SV=1	uniprot-cflo3AUP000000311:tr|E2A710|E2A710_CAMFO LSM14 protein-like protein A OS=Camponotus floridanus GN=EAG_04717 PE=4 SV=1	uniprot-sinv3AUP000006539:tr|E9I9W6|E9I9W6_SOLIN Putative uncharacterized protein (Fragment) OS=Solenopsis invicta GN=SINV_00315 PE=4 SV=1
OMA04230	Amelprot:gi|328786251|ref|XP_395471.3| PREDICTED: transmembrane channel-like protein 7-like [Apis mellifera]	Cfelprot80:comp41656_c0_seq1_593_2910	Cfloprot:gi|752860090|ref|XP_011269493.1| PREDICTED: transmembrane channel-like protein 7 [Camponotus floridanus]	Sinvprot:gi|751200449|ref|XP_011162314.1| PREDICTED: transmembrane channel-like protein 7 [Solenopsis invicta]	uniprot-apis3AUP000005203:tr|A0A088ALH2|A0A088ALH2_APIME Uncharacterized protein OS=Apis mellifera GN=Ame.30244 PE=4 SV=1	uniprot-cflo3AUP000000311:tr|E1ZVE5|E1ZVE5_CAMFO Transmembrane channel-like protein 7 OS=Camponotus floridanus GN=EAG_06344 PE=4 SV=1	uniprot-sinv3AUP000006539:tr|E9I9Z4|E9I9Z4_SOLIN Putative uncharacterized protein (Fragment) OS=Solenopsis invicta GN=SINV_11504 PE=4 SV=1
OMA02878	Amelprot:gi|328789740|ref|XP_001121890.2| PREDICTED: LOW QUALITY PROTEIN: leucine-rich repeats and immunoglobulin-like domains 3 [Apis mellifera]	Cfelprot80:comp63477_c0_seq1_1_2120	Cfloprot:gi|752860094|ref|XP_011269517.1| PREDICTED: leucine-rich repeats and immunoglobulin-like domains protein 3 [Camponotus floridanus]	Sinvprot:gi|751200451|ref|XP_011162327.1| PREDICTED: leucine-rich repeats and immunoglobulin-like domains protein 3 isoform X1 [Solenopsis invicta]	uniprot-apis3AUP000005203:tr|A0A088AUX2|A0A088AUX2_APIME Uncharacterized protein OS=Apis mellifera PE=4 SV=1	uniprot-cflo3AUP000000311:tr|E1ZVE8|E1ZVE8_CAMFO Leucine-rich repeats and immunoglobulin-like domains protein 3 OS=Camponotus floridanus GN=EAG_06347 PE=4 SV=1	uniprot-sinv3AUP000006539:tr|E9I9Z6|E9I9Z6_SOLIN Putative uncharacterized protein (Fragment) OS=Solenopsis invicta GN=SINV_14003 PE=4 SV=1
OMA05358	Amelprot:gi|571513874|ref|XP_006568714.1| PREDICTED: trehalase isoform X1 [Apis mellifera]	Cfelprot80:comp63809_c0_seq2_1002_2934	Cfloprot:gi|752860099|ref|XP_011269541.1| PREDICTED: trehalase isoform X2 [Camponotus floridanus]	Sinvprot:gi|751200460|ref|XP_011162365.1| PREDICTED: trehalase-like isoform X2 [Solenopsis invicta]	uniprot-apis3AUP000005203:tr|A0A088AUT8|A0A088AUT8_APIME Trehalase OS=Apis mellifera GN=LOC410795 PE=3 SV=1	uniprot-cflo3AUP000000311:tr|E1ZVE9|E1ZVE9_CAMFO Trehalase OS=Camponotus floridanus GN=EAG_06348 PE=3 SV=1	uniprot-sinv3AUP000006539:tr|E9I9Z8|E9I9Z8_SOLIN Trehalase (Fragment) OS=Solenopsis invicta GN=SINV_13778 PE=3 SV=1
OMA05729	Amelprot:gi|66513183|ref|XP_396855.2| PREDICTED: myotubularin-related protein 14 isoform 1 [Apis mellifera]	Cfelprot80:comp66200_c0_seq10_591_2253	Cfloprot:gi|752891524|ref|XP_011263805.1| PREDICTED: myotubularin-related protein 14 isoform X1 [Camponotus floridanus]	Sinvprot:gi|751200490|ref|XP_011162501.1| PREDICTED: LOW QUALITY PROTEIN: myotubularin-related protein 14 [Solenopsis invicta]	uniprot-apis3AUP000005203:tr|A0A088A4P3|A0A088A4P3_APIME Uncharacterized protein OS=Apis mellifera GN=EDTP PE=4 SV=1	uniprot-cflo3AUP000000311:tr|E2ATT4|E2ATT4_CAMFO Myotubularin-related protein 14 OS=Camponotus floridanus GN=EAG_12906 PE=4 SV=1	uniprot-sinv3AUP000006539:tr|E9IA04|E9IA04_SOLIN Putative uncharacterized protein (Fragment) OS=Solenopsis invicta GN=SINV_02810 PE=4 SV=1
OMA05306	Amelprot:gi|571568218|ref|XP_006562811.1| PREDICTED: segment polarity protein dishevelled homolog DVL-3 isoform X2 [Apis mellifera]	Cfelprot80:comp46428_c0_seq4_362_2385	Cfloprot:gi|752897134|ref|XP_011266859.1| PREDICTED: segment polarity protein dishevelled homolog DVL-3 isoform X1 [Camponotus floridanus]	Sinvprot:gi|751200500|ref|XP_011162552.1| PREDICTED: segment polarity protein dishevelled homolog DVL-3 isoform X3 [Solenopsis invicta]	uniprot-apis3AUP000005203:tr|A0A088AQC9|A0A088AQC9_APIME Uncharacterized protein OS=Apis mellifera GN=dsh PE=4 SV=1	uniprot-cflo3AUP000000311:tr|E2AZQ0|E2AZQ0_CAMFO Segment polarity protein dishevelled-like protein DVL-3 OS=Camponotus floridanus GN=EAG_05836 PE=4 SV=1	uniprot-sinv3AUP000006539:tr|E9IA06|E9IA06_SOLIN Putative uncharacterized protein (Fragment) OS=Solenopsis invicta GN=SINV_12205 PE=4 SV=1
OMA15089	Amelprot:gi|66547108|ref|XP_393026.2| PREDICTED: glucosamine-6-phosphate isomerase isoformX1 [Apis mellifera]	Cfelprot80:comp46426_c0_seq1_410_1202	Cfloprot:gi|752883528|ref|XP_011259467.1| PREDICTED: glucosamine-6-phosphate isomerase isoform X2 [Camponotus floridanus]	Sinvprot:gi|751200526|ref|XP_011162678.1| PREDICTED: glucosamine-6-phosphate isomerase isoform X1 [Solenopsis invicta]	uniprot-apis3AUP000005203:tr|A0A087ZPX4|A0A087ZPX4_APIME Glucosamine-6-phosphate isomerase OS=Apis mellifera GN=Oscillin PE=3 SV=1	uniprot-cflo3AUP000000311:tr|E2AJX9|E2AJX9_CAMFO Glucosamine-6-phosphate isomerase OS=Camponotus floridanus GN=EAG_13775 PE=3 SV=1	uniprot-sinv3AUP000006539:tr|E9IA09|E9IA09_SOLIN Glucosamine-6-phosphate isomerase (Fragment) OS=Solenopsis invicta GN=SINV_08229 PE=3 SV=1
OMA17315	Amelprot:gi|66530730|ref|XP_395804.2| PREDICTED: sesquipedalian-1-like [Apis mellifera]	Cfelprot80:comp67983_c0_seq1_368_917	Cfloprot:gi|752873670|ref|XP_011254125.1| PREDICTED: sesquipedalian-1 [Camponotus floridanus]	Sinvprot:gi|751200548|ref|XP_011162811.1| PREDICTED: sesquipedalian-1 [Solenopsis invicta]	uniprot-apis3AUP000005203:tr|A0A088A3N4|A0A088A3N4_APIME Uncharacterized protein OS=Apis mellifera GN=LOC412343 PE=4 SV=1	uniprot-cflo3AUP000000311:tr|E2A9V1|E2A9V1_CAMFO Protein FAM109A OS=Camponotus floridanus GN=EAG_02779 PE=4 SV=1	uniprot-sinv3AUP000006539:tr|E9IA18|E9IA18_SOLIN Putative uncharacterized protein (Fragment) OS=Solenopsis invicta GN=SINV_06092 PE=4 SV=1
OMA18426	Amelprot:gi|328781210|ref|XP_392538.3| PREDICTED: polyamine-modulated factor 1-like isoform 1 [Apis mellifera]	Cfelprot80:comp46230_c0_seq1_1_472	Cfloprot:gi|752868815|ref|XP_011251494.1| PREDICTED: uncharacterized protein LOC105248423 [Camponotus floridanus]	Sinvprot:gi|751200552|ref|XP_011162840.1| PREDICTED: uncharacterized protein LOC105197929 [Solenopsis invicta]	uniprot-apis3AUP000005203:tr|A0A087ZVJ5|A0A087ZVJ5_APIME Uncharacterized protein OS=Apis mellifera GN=LOC409009 PE=4 SV=1	uniprot-cflo3AUP000000311:tr|E2A4L5|E2A4L5_CAMFO Putative uncharacterized protein OS=Camponotus floridanus GN=EAG_11606 PE=4 SV=1	uniprot-sinv3AUP000006539:tr|E9IA20|E9IA20_SOLIN Putative uncharacterized protein (Fragment) OS=Solenopsis invicta GN=SINV_02842 PE=4 SV=1
OMA11141	Amelprot:gi|328787037|ref|XP_395023.4| PREDICTED: ceramide glucosyltransferase [Apis mellifera]	Cfelprot80:comp56361_c0_seq1_3530_3604	Cfloprot:gi|752893743|ref|XP_011265026.1| PREDICTED: ceramide glucosyltransferase [Camponotus floridanus]	Sinvprot:gi|751200578|ref|XP_011163004.1| PREDICTED: ceramide glucosyltransferase [Solenopsis invicta]	uniprot-apis3AUP000005203:tr|A0A088A139|A0A088A139_APIME Uncharacterized protein OS=Apis mellifera GN=GlcT-1 PE=4 SV=1	uniprot-cflo3AUP000000311:tr|E2AW08|E2AW08_CAMFO Ceramide glucosyltransferase OS=Camponotus floridanus GN=EAG_01621 PE=4 SV=1	uniprot-sinv3AUP000006539:tr|E9IA29|E9IA29_SOLIN Putative uncharacterized protein (Fragment) OS=Solenopsis invicta GN=SINV_08161 PE=4 SV=1
OMA04277	Amelprot:gi|571523110|ref|XP_395411.4| PREDICTED: anaphase-promoting complex subunit 2, partial [Apis mellifera]	Cfelprot80:comp63966_c0_seq1_71_2368	Cfloprot:gi|752876055|ref|XP_011255407.1| PREDICTED: anaphase-promoting complex subunit 2 isoform X2 [Camponotus floridanus]	Sinvprot:gi|751200588|ref|XP_011163041.1| PREDICTED: anaphase-promoting complex subunit 2 isoform X2 [Solenopsis invicta]	uniprot-apis3AUP000005203:tr|A0A088ADT4|A0A088ADT4_APIME Uncharacterized protein OS=Apis mellifera GN=mr PE=3 SV=1	uniprot-cflo3AUP000000311:tr|E2ACD3|E2ACD3_CAMFO Anaphase-promoting complex subunit 2 OS=Camponotus floridanus GN=EAG_03500 PE=3 SV=1	uniprot-sinv3AUP000006539:tr|E9IA33|E9IA33_SOLIN Putative uncharacterized protein (Fragment) OS=Solenopsis invicta GN=SINV_02782 PE=3 SV=1
OMA11796	Amelprot:gi|571571609|ref|XP_006563146.1| PREDICTED: integrator complex subunit 5-like protein-like [Apis mellifera]	Cfelprot80:comp40080_c0_seq1_344_1459	Cfloprot:gi|752896606|ref|XP_011266568.1| PREDICTED: homocysteine-responsive endoplasmic reticulum-resident ubiquitin-like domain member 2 protein [Camponotus floridanus]	Sinvprot:gi|751200602|ref|XP_011163105.1| PREDICTED: homocysteine-responsive endoplasmic reticulum-resident ubiquitin-like domain member 2 protein, partial [Solenopsis invicta]	uniprot-apis3AUP000005203:tr|A0A088ARA5|A0A088ARA5_APIME Uncharacterized protein OS=Apis mellifera GN=LOC725292 PE=4 SV=1	uniprot-cflo3AUP000000311:tr|E2AZ26|E2AZ26_CAMFO Homocysteine-responsive endoplasmic reticulum-resident ubiquitin-like domain member 2 protein OS=Camponotus floridanus GN=EAG_00952 PE=4 SV=1	uniprot-sinv3AUP000006539:tr|E9IA41|E9IA41_SOLIN Putative uncharacterized protein (Fragment) OS=Solenopsis invicta GN=SINV_80677 PE=4 SV=1
OMA06879	Amelprot:gi|571532906|ref|XP_006560870.1| PREDICTED: alpha-glucosidase isoform X3 [Apis mellifera]	Cfelprot80:comp45675_c0_seq1_153_1782	Cfloprot:gi|752872624|ref|XP_011253559.1| PREDICTED: alpha-glucosidase-like [Camponotus floridanus]	Sinvprot:gi|751200673|ref|XP_011163449.1| PREDICTED: alpha-glucosidase-like [Solenopsis invicta]	uniprot-apis3AUP000005203:sp|Q17058|MAL1_APIME Alpha-glucosidase OS=Apis mellifera PE=1 SV=1	uniprot-cflo3AUP000000311:tr|E2A8S5|E2A8S5_CAMFO Alpha-glucosidase OS=Camponotus floridanus GN=EAG_01471 PE=4 SV=1	uniprot-sinv3AUP000006539:tr|E9IA43|E9IA43_SOLIN Putative uncharacterized protein (Fragment) OS=Solenopsis invicta GN=SINV_00797 PE=4 SV=1
OMA12563	Amelprot:gi|66558006|ref|XP_395905.2| PREDICTED: zinc transporter ZIP1-like [Apis mellifera]	Cfelprot80:comp33275_c0_seq1_818_1298	Cfloprot:gi|752872650|ref|XP_011253573.1| PREDICTED: zinc transporter ZIP1 [Camponotus floridanus]	Sinvprot:gi|751200687|ref|XP_011163511.1| PREDICTED: uncharacterized protein LOC105198488 [Solenopsis invicta]	uniprot-apis3AUP000005203:tr|A0A087ZVP2|A0A087ZVP2_APIME Uncharacterized protein OS=Apis mellifera GN=LOC412448 PE=4 SV=1	uniprot-cflo3AUP000000311:tr|E2A8S9|E2A8S9_CAMFO Zinc transporter ZIP3 OS=Camponotus floridanus GN=EAG_01475 PE=4 SV=1	uniprot-sinv3AUP000006539:tr|E9IA44|E9IA44_SOLIN Putative uncharacterized protein (Fragment) OS=Solenopsis invicta GN=SINV_12720 PE=4 SV=1
OMA01707	Amelprot:gi|571578160|ref|XP_006572303.1| PREDICTED: probable ATP-dependent RNA helicase DHX34-like [Apis mellifera]	Cfelprot80:comp60706_c0_seq3_240_3417	Cfloprot:gi|752886958|ref|XP_011261331.1| PREDICTED: probable ATP-dependent RNA helicase DHX34, partial [Camponotus floridanus]	Sinvprot:gi|751200691|ref|XP_011163532.1| PREDICTED: probable ATP-dependent RNA helicase DHX34 [Solenopsis invicta]	uniprot-apis3AUP000005203:tr|A0A087ZVP3|A0A087ZVP3_APIME Uncharacterized protein OS=Apis mellifera GN=LOC102655219 PE=4 SV=1	uniprot-cflo3AUP000000311:tr|E2A8T0|E2A8T0_CAMFO Probable ATP-dependent RNA helicase DHX34 OS=Camponotus floridanus GN=EAG_01476 PE=4 SV=1	uniprot-sinv3AUP000006539:tr|E9IA45|E9IA45_SOLIN Putative uncharacterized protein (Fragment) OS=Solenopsis invicta GN=SINV_16346 PE=4 SV=1
OMA12488	Amelprot:gi|571532666|ref|XP_006559115.1| PREDICTED: ethanolamine kinase-like isoform X1 [Apis mellifera]	Cfelprot80:comp62457_c0_seq4_434_1373	Cfloprot:gi|752872667|ref|XP_011253582.1| PREDICTED: ethanolamine kinase 1 [Camponotus floridanus]	Sinvprot:gi|751200711|ref|XP_011163621.1| PREDICTED: ethanolamine kinase 1 isoform X1 [Solenopsis invicta]	uniprot-apis3AUP000005203:tr|A0A088A9M7|A0A088A9M7_APIME Uncharacterized protein OS=Apis mellifera GN=LOC102656504 PE=4 SV=1	uniprot-cflo3AUP000000311:tr|E2A8T5|E2A8T5_CAMFO Ethanolamine kinase 1 OS=Camponotus floridanus GN=EAG_01481 PE=4 SV=1	uniprot-sinv3AUP000006539:tr|E9IA48|E9IA48_SOLIN Putative uncharacterized protein (Fragment) OS=Solenopsis invicta GN=SINV_14682 PE=4 SV=1
OMA01260	Amelprot:gi|571532685|ref|XP_006559121.1| PREDICTED: Bloom syndrome protein homolog, partial [Apis mellifera]	Cfelprot80:comp65629_c0_seq3_278_4154	Cfloprot:gi|752872671|ref|XP_011253584.1| PREDICTED: Bloom syndrome protein homolog isoform X1 [Camponotus floridanus]	Sinvprot:gi|751200729|ref|XP_011163689.1| PREDICTED: Bloom syndrome protein homolog [Solenopsis invicta]	uniprot-apis3AUP000005203:tr|A0A088A9L6|A0A088A9L6_APIME Uncharacterized protein OS=Apis mellifera PE=4 SV=1	uniprot-cflo3AUP000000311:tr|E2A8T6|E2A8T6_CAMFO Bloom syndrome protein-like protein OS=Camponotus floridanus GN=EAG_01482 PE=4 SV=1	uniprot-sinv3AUP000006539:tr|E9IA49|E9IA49_SOLIN Putative uncharacterized protein (Fragment) OS=Solenopsis invicta GN=SINV_04660 PE=4 SV=1
OMA15537	Amelprot:gi|571509114|ref|XP_006571470.1| PREDICTED: PCTP-like protein-like isoform X1 [Apis mellifera]	Cfelprot80:comp53979_c0_seq2_967_1515	Cfloprot:gi|752881767|ref|XP_011258502.1| PREDICTED: PCTP-like protein [Camponotus floridanus]	Sinvprot:gi|751200741|ref|XP_011163745.1| PREDICTED: PCTP-like protein [Solenopsis invicta]	uniprot-apis3AUP000005203:tr|A0A088AJ32|A0A088AJ32_APIME Uncharacterized protein OS=Apis mellifera GN=LOC412361 PE=4 SV=1	uniprot-cflo3AUP000000311:tr|E2AI66|E2AI66_CAMFO PCTP-like protein OS=Camponotus floridanus GN=EAG_04769 PE=4 SV=1	uniprot-sinv3AUP000006539:tr|E9IA51|E9IA51_SOLIN Putative uncharacterized protein (Fragment) OS=Solenopsis invicta GN=SINV_04543 PE=4 SV=1
OMA01064	Amelprot:gi|571507712|ref|XP_006571194.1| PREDICTED: LOW QUALITY PROTEIN: rab3 GTPase-activating protein non-catalytic subunit-like [Apis mellifera]	Cfelprot80:comp55337_c0_seq1_147_4321	Cfloprot:gi|752881785|ref|XP_011258512.1| PREDICTED: rab3 GTPase-activating protein non-catalytic subunit [Camponotus floridanus]	Sinvprot:gi|751200749|ref|XP_011163796.1| PREDICTED: rab3 GTPase-activating protein non-catalytic subunit [Solenopsis invicta]	uniprot-apis3AUP000005203:tr|A0A087ZMU0|A0A087ZMU0_APIME Uncharacterized protein OS=Apis mellifera GN=LOC100578281 PE=4 SV=1	uniprot-cflo3AUP000000311:tr|E2AI71|E2AI71_CAMFO Rab3 GTPase-activating protein non-catalytic subunit OS=Camponotus floridanus GN=EAG_04774 PE=4 SV=1	uniprot-sinv3AUP000006539:tr|E9IA54|E9IA54_SOLIN Putative uncharacterized protein (Fragment) OS=Solenopsis invicta GN=SINV_05735 PE=4 SV=1
OMA01964	Amelprot:gi|66511388|ref|XP_623795.1| PREDICTED: DNA polymerase delta catalytic subunit isoform X3 [Apis mellifera]	Cfelprot80:comp61741_c1_seq1_95_275	Cfloprot:gi|752897601|ref|XP_011267114.1| PREDICTED: DNA polymerase delta catalytic subunit [Camponotus floridanus]	Sinvprot:gi|751200610|ref|XP_011163143.1| PREDICTED: DNA polymerase delta catalytic subunit [Solenopsis invicta]	uniprot-apis3AUP000005203:tr|A0A087ZVU5|A0A087ZVU5_APIME DNA polymerase OS=Apis mellifera GN=DNApol-delta PE=3 SV=1	uniprot-cflo3AUP000000311:tr|E2B054|E2B054_CAMFO DNA polymerase OS=Camponotus floridanus GN=EAG_02645 PE=3 SV=1	uniprot-sinv3AUP000006539:tr|E9IA59|E9IA59_SOLIN DNA polymerase (Fragment) OS=Solenopsis invicta GN=SINV_03834 PE=3 SV=1
OMA12755	Amelprot:gi|328783137|ref|XP_624434.2| PREDICTED: zinc finger protein 330 homolog [Apis mellifera]	Cfelprot80:comp53301_c0_seq1_549_718	Cfloprot:gi|752897597|ref|XP_011267112.1| PREDICTED: zinc finger protein 330 homolog [Camponotus floridanus]	Sinvprot:gi|751200613|ref|XP_011163161.1| PREDICTED: zinc finger protein 330 homolog [Solenopsis invicta]	uniprot-apis3AUP000005203:tr|A0A087ZPV1|A0A087ZPV1_APIME Uncharacterized protein OS=Apis mellifera GN=Noa36 PE=4 SV=1	uniprot-cflo3AUP000000311:tr|E2B051|E2B051_CAMFO Zinc finger protein 330-like protein OS=Camponotus floridanus GN=EAG_02642 PE=4 SV=1	uniprot-sinv3AUP000006539:tr|E9IA60|E9IA60_SOLIN Putative uncharacterized protein (Fragment) OS=Solenopsis invicta GN=SINV_01292 PE=4 SV=1
OMA10328	Amelprot:gi|224809489|ref|NP_001139207.1| synaptotagmin 1 [Apis mellifera]	Cfelprot80:comp61336_c0_seq1_368_1560	Cfloprot:gi|752878090|ref|XP_011256511.1| PREDICTED: synaptotagmin 1 isoform X1 [Camponotus floridanus]	Sinvprot:gi|751200617|ref|XP_011163184.1| PREDICTED: synaptotagmin 1 isoform X1 [Solenopsis invicta]	uniprot-apis3AUP000005203:tr|A0A088AT06|A0A088AT06_APIME Uncharacterized protein OS=Apis mellifera GN=Syt1 PE=4 SV=1	uniprot-cflo3AUP000000311:tr|E2AE99|E2AE99_CAMFO Synaptotagmin OS=Camponotus floridanus GN=EAG_13243 PE=4 SV=1	uniprot-sinv3AUP000006539:tr|E9IA62|E9IA62_SOLIN Putative uncharacterized protein (Fragment) OS=Solenopsis invicta GN=SINV_00788 PE=4 SV=1
OMA15910	Amelprot:gi|328782315|ref|XP_392155.2| PREDICTED: uncharacterized protein LOC408614 isoformX1 [Apis mellifera]	Cfelprot80:comp62533_c0_seq3_213_866	Cfloprot:gi|752878080|ref|XP_011256505.1| PREDICTED: putative uncharacterized protein DDB_G0271526 [Camponotus floridanus]	Sinvprot:gi|751200623|ref|XP_011163202.1| PREDICTED: uncharacterized protein LOC105198243 isoform X1 [Solenopsis invicta]	uniprot-apis3AUP000005203:tr|A0A088AT08|A0A088AT08_APIME Uncharacterized protein OS=Apis mellifera GN=LOC408614 PE=4 SV=1	uniprot-cflo3AUP000000311:tr|E2AEA2|E2AEA2_CAMFO Neuroendocrine protein 7B2 OS=Camponotus floridanus GN=EAG_13246 PE=4 SV=1	uniprot-sinv3AUP000006539:tr|E9IA67|E9IA67_SOLIN Putative uncharacterized protein (Fragment) OS=Solenopsis invicta GN=SINV_00425 PE=4 SV=1
OMA05076	Amelprot:gi|571502654|ref|XP_006565344.1| PREDICTED: solute carrier family 22 member 8-like isoform X1 [Apis mellifera]	Cfelprot80:comp64901_c0_seq3_212_2246	Cfloprot:gi|752872598|ref|XP_011253545.1| PREDICTED: organic cation transporter protein-like [Camponotus floridanus]	Sinvprot:gi|751200651|ref|XP_011163343.1| PREDICTED: solute carrier family 22 member 3-like [Solenopsis invicta]	uniprot-apis3AUP000005203:tr|A0A088AC25|A0A088AC25_APIME Uncharacterized protein OS=Apis mellifera GN=LOC726412 PE=4 SV=1	uniprot-cflo3AUP000000311:tr|E2A8R5|E2A8R5_CAMFO Solute carrier family 22 member 8 OS=Camponotus floridanus GN=EAG_01461 PE=4 SV=1	uniprot-sinv3AUP000006539:tr|E9IA77|E9IA77_SOLIN Putative uncharacterized protein (Fragment) OS=Solenopsis invicta GN=SINV_06783 PE=4 SV=1
OMA15277	Amelprot:gi|571578214|ref|XP_006572323.1| PREDICTED: structure-specific endonuclease subunit slx1-like isoform X1 [Apis mellifera]	Cfelprot80:comp53550_c0_seq1_368_573	Cfloprot:gi|752872783|ref|XP_011253646.1| PREDICTED: structure-specific endonuclease subunit slx1 [Camponotus floridanus]	Sinvprot:gi|751200655|ref|XP_011163360.1| PREDICTED: structure-specific endonuclease subunit slx1 [Solenopsis invicta]	uniprot-apis3AUP000005203:tr|A0A087ZVQ2|A0A087ZVQ2_APIME Structure-specific endonuclease subunit SLX1 homolog OS=Apis mellifera GN=LOC102656132 PE=3 SV=1	uniprot-cflo3AUP000000311:tr|E2A8R7|E2A8R7_CAMFO Structure-specific endonuclease subunit SLX1 homolog OS=Camponotus floridanus GN=EAG_01463 PE=3 SV=1	uniprot-sinv3AUP000006539:tr|E9IA79|E9IA79_SOLIN Putative uncharacterized protein (Fragment) OS=Solenopsis invicta GN=SINV_06653 PE=3 SV=1
OMA09842	Amelprot:gi|110748957|ref|XP_001121270.1| PREDICTED: UPF0396 protein CG6066-like isoform X1 [Apis mellifera]	Cfelprot80:comp55962_c0_seq2_155_1604	Cfloprot:gi|752872618|ref|XP_011253556.1| PREDICTED: UPF0396 protein CG6066-like [Camponotus floridanus]	Sinvprot:gi|751200663|ref|XP_011163394.1| PREDICTED: UPF0396 protein CG6066-like [Solenopsis invicta]	uniprot-apis3AUP000005203:tr|A0A087ZPZ8|A0A087ZPZ8_APIME Uncharacterized protein OS=Apis mellifera GN=LOC725419 PE=4 SV=1	uniprot-cflo3AUP000000311:tr|E2A8S0|E2A8S0_CAMFO ADP-ribosylation factor-like protein 6-interacting protein 4 OS=Camponotus floridanus GN=EAG_01466 PE=4 SV=1	uniprot-sinv3AUP000006539:tr|E9IA81|E9IA81_SOLIN Putative uncharacterized protein (Fragment) OS=Solenopsis invicta GN=SINV_08770 PE=4 SV=1
OMA14179	Amelprot:gi|571519294|ref|XP_006564000.1| PREDICTED: uncharacterized protein LOC726365 isoform X1 [Apis mellifera]	Cfelprot80:comp62377_c1_seq28_989_1543	Cfloprot:gi|752865478|ref|XP_011269185.1| PREDICTED: uncharacterized protein LOC105259141 [Camponotus floridanus]	Sinvprot:gi|751200789|ref|XP_011164013.1| PREDICTED: uncharacterized protein LOC105198861 [Solenopsis invicta]	uniprot-apis3AUP000005203:tr|A0A088AQ04|A0A088AQ04_APIME Uncharacterized protein OS=Apis mellifera GN=LOC726365 PE=4 SV=1	uniprot-cflo3AUP000000311:tr|E2A152|E2A152_CAMFO Putative uncharacterized protein OS=Camponotus floridanus GN=EAG_00900 PE=4 SV=1	uniprot-sinv3AUP000006539:tr|E9IA96|E9IA96_SOLIN Putative uncharacterized protein (Fragment) OS=Solenopsis invicta GN=SINV_05860 PE=4 SV=1
OMA02768	Amelprot:gi|571518778|ref|XP_006561015.1| PREDICTED: DNA ligase 1-like isoform X2 [Apis mellifera]	Cfelprot80:comp59470_c0_seq1_1_2773	Cfloprot:gi|752865565|ref|XP_011269232.1| PREDICTED: DNA ligase 1 [Camponotus floridanus]	Sinvprot:gi|751200795|ref|XP_011164034.1| PREDICTED: DNA ligase 1 isoform X2 [Solenopsis invicta]	uniprot-apis3AUP000005203:tr|A0A088AVT0|A0A088AVT0_APIME DNA ligase OS=Apis mellifera GN=LOC408752 PE=3 SV=1	uniprot-cflo3AUP000000311:tr|E2A154|E2A154_CAMFO DNA ligase OS=Camponotus floridanus GN=EAG_00902 PE=3 SV=1	uniprot-sinv3AUP000006539:tr|E9IA98|E9IA98_SOLIN DNA ligase (Fragment) OS=Solenopsis invicta GN=SINV_00170 PE=3 SV=1
OMA16480	Amelprot:gi|328790263|ref|XP_001121569.2| PREDICTED: CD81 antigen isoform X1 [Apis mellifera]	Cfelprot80:comp40341_c0_seq1_188_855	Cfloprot:gi|752865494|ref|XP_011269194.1| PREDICTED: CD9 antigen [Camponotus floridanus]	Sinvprot:gi|751200797|ref|XP_011164045.1| PREDICTED: CD9 antigen [Solenopsis invicta]	uniprot-apis3AUP000005203:tr|A0A088A8X8|A0A088A8X8_APIME Tetraspanin OS=Apis mellifera GN=Tspan3 PE=3 SV=1	uniprot-cflo3AUP000000311:tr|E2A155|E2A155_CAMFO Tetraspanin OS=Camponotus floridanus GN=EAG_00903 PE=3 SV=1	uniprot-sinv3AUP000006539:tr|E9IA99|E9IA99_SOLIN Tetraspanin (Fragment) OS=Solenopsis invicta GN=SINV_10782 PE=3 SV=1
OMA02827	Amelprot:gi|571530792|ref|XP_006569552.1| PREDICTED: flocculation protein FLO11-like [Apis mellifera]	Cfelprot80:comp63418_c0_seq1_5_2948	Cfloprot:gi|752865496|ref|XP_011269195.1| PREDICTED: flocculation protein FLO11 isoform X1 [Camponotus floridanus]	Sinvprot:gi|751200799|ref|XP_011164059.1| PREDICTED: uncharacterized protein LOC105198896 isoform X1 [Solenopsis invicta]	uniprot-apis3AUP000005203:tr|A0A088A8Z1|A0A088A8Z1_APIME Uncharacterized protein OS=Apis mellifera GN=LOC551920 PE=4 SV=1	uniprot-cflo3AUP000000311:tr|E2A156|E2A156_CAMFO Putative uncharacterized protein OS=Camponotus floridanus GN=EAG_00904 PE=4 SV=1	uniprot-sinv3AUP000006539:tr|E9IAA0|E9IAA0_SOLIN Putative uncharacterized protein (Fragment) OS=Solenopsis invicta GN=SINV_11324 PE=4 SV=1
OMA09918	Amelprot:gi|328789982|ref|XP_003251354.1| PREDICTED: tRNA-splicing endonuclease subunit Sen2-like [Apis mellifera]	Cfelprot80:comp55017_c0_seq2_214_1458	Cfloprot:gi|752865502|ref|XP_011269198.1| PREDICTED: tRNA-splicing endonuclease subunit Sen2 [Camponotus floridanus]	Sinvprot:gi|751200806|ref|XP_011164080.1| PREDICTED: tRNA-splicing endonuclease subunit Sen2 [Solenopsis invicta]	uniprot-apis3AUP000005203:tr|A0A087ZR04|A0A087ZR04_APIME tRNA-splicing endonuclease subunit Sen2 OS=Apis mellifera GN=LOC100576366 PE=3 SV=1	uniprot-cflo3AUP000000311:tr|E2A157|E2A157_CAMFO tRNA-splicing endonuclease subunit Sen2 OS=Camponotus floridanus GN=EAG_00905 PE=3 SV=1	uniprot-sinv3AUP000006539:tr|E9IAA1|E9IAA1_SOLIN Putative uncharacterized protein (Fragment) OS=Solenopsis invicta GN=SINV_07981 PE=4 SV=1
OMA15676	Amelprot:gi|328789900|ref|XP_003251344.1| PREDICTED: chondroitin proteoglycan-2-like [Apis mellifera]	Cfelprot80:comp30350_c0_seq2_344_1080	Cfloprot:gi|752865513|ref|XP_011269204.1| PREDICTED: chondroitin proteoglycan-2-like [Camponotus floridanus]	Sinvprot:gi|751200818|ref|XP_011164135.1| PREDICTED: chondroitin proteoglycan-2 [Solenopsis invicta]	uniprot-apis3AUP000005203:tr|A0A087ZR63|A0A087ZR63_APIME Uncharacterized protein OS=Apis mellifera GN=LOC100577576 PE=4 SV=1	uniprot-cflo3AUP000000311:tr|E2A162|E2A162_CAMFO Chondroitin proteoglycan-2 OS=Camponotus floridanus GN=EAG_00910 PE=4 SV=1	uniprot-sinv3AUP000006539:tr|E9IAA4|E9IAA4_SOLIN Putative uncharacterized protein (Fragment) OS=Solenopsis invicta GN=SINV_06853 PE=4 SV=1
OMA01561	Amelprot:gi|328789935|ref|XP_001120957.2| PREDICTED: trichohyalin [Apis mellifera]	Cfelprot80:comp56610_c0_seq1_1_3349	Cfloprot:gi|752865521|ref|XP_011269208.1| PREDICTED: enolase-phosphatase E1-like [Camponotus floridanus]	Sinvprot:gi|751200824|ref|XP_011164154.1| PREDICTED: RE1-silencing transcription factor-like [Solenopsis invicta]	uniprot-apis3AUP000005203:tr|A0A087ZR35|A0A087ZR35_APIME Uncharacterized protein OS=Apis mellifera GN=pita PE=4 SV=1	uniprot-cflo3AUP000000311:tr|E2A167|E2A167_CAMFO Zinc finger protein 26 (Fragment) OS=Camponotus floridanus GN=EAG_00915 PE=4 SV=1	uniprot-sinv3AUP000006539:tr|E9IAB1|E9IAB1_SOLIN Putative uncharacterized protein (Fragment) OS=Solenopsis invicta GN=SINV_14204 PE=4 SV=1
OMA16270	Amelprot:gi|571520905|ref|XP_006569281.1| PREDICTED: aquaporin AQPAn.G-like isoform X3 [Apis mellifera]	Cfelprot80:comp60810_c0_seq1_456_1198	Cfloprot:gi|752865531|ref|XP_011269214.1| PREDICTED: aquaporin AQPAn.G isoform X3 [Camponotus floridanus]	Sinvprot:gi|751200868|ref|XP_011164363.1| PREDICTED: aquaporin AQPAn.G-like [Solenopsis invicta]	uniprot-apis3AUP000005203:tr|A0A087ZR36|A0A087ZR36_APIME Uncharacterized protein OS=Apis mellifera GN=LOC552149 PE=3 SV=1	uniprot-cflo3AUP000000311:tr|E2A169|E2A169_CAMFO Aquaporin AQPAn.G (Fragment) OS=Camponotus floridanus GN=EAG_00917 PE=3 SV=1	uniprot-sinv3AUP000006539:tr|E9IAB3|E9IAB3_SOLIN Putative uncharacterized protein (Fragment) OS=Solenopsis invicta GN=SINV_11793 PE=3 SV=1
OMA05343	Amelprot:gi|328789942|ref|XP_392262.3| PREDICTED: SET and MYND domain-containing protein 4-like [Apis mellifera]	Cfelprot80:comp62140_c0_seq6_163_2166	Cfloprot:gi|752865533|ref|XP_011269215.1| PREDICTED: SET and MYND domain-containing protein 4 [Camponotus floridanus]	Sinvprot:gi|751200832|ref|XP_011164189.1| PREDICTED: SET and MYND domain-containing protein 4-like isoform X2 [Solenopsis invicta]	uniprot-apis3AUP000005203:tr|A0A087ZR37|A0A087ZR37_APIME Uncharacterized protein OS=Apis mellifera GN=LOC408727 PE=4 SV=1	uniprot-cflo3AUP000000311:tr|E2A170|E2A170_CAMFO SET and MYND domain-containing protein 4 OS=Camponotus floridanus GN=EAG_00918 PE=4 SV=1	uniprot-sinv3AUP000006539:tr|E9IAB4|E9IAB4_SOLIN Putative uncharacterized protein (Fragment) OS=Solenopsis invicta GN=SINV_02250 PE=4 SV=1
OMA17020	Amelprot:gi|571520943|ref|XP_006569288.1| PREDICTED: mediator of RNA polymerase II transcription subunit 18 isoform X1 [Apis mellifera]	Cfelprot80:comp71165_c0_seq1_323_979	Cfloprot:gi|752865561|ref|XP_011269230.1| PREDICTED: mediator of RNA polymerase II transcription subunit 18 isoform X1 [Camponotus floridanus]	Sinvprot:gi|751200834|ref|XP_011164200.1| PREDICTED: mediator of RNA polymerase II transcription subunit 18 [Solenopsis invicta]	uniprot-apis3AUP000005203:tr|A0A087ZR21|A0A087ZR21_APIME Uncharacterized protein OS=Apis mellifera GN=MED18 PE=4 SV=1	uniprot-cflo3AUP000000311:tr|E2A173|E2A173_CAMFO Mediator of RNA polymerase II transcription subunit 18 OS=Camponotus floridanus GN=EAG_00921 PE=4 SV=1	uniprot-sinv3AUP000006539:tr|E9IAB6|E9IAB6_SOLIN Putative uncharacterized protein (Fragment) OS=Solenopsis invicta GN=SINV_00845 PE=4 SV=1
OMA09002	Amelprot:gi|571546870|ref|XP_006569851.1| PREDICTED: ubiquitin carboxyl-terminal hydrolase 30-like isoform X1 [Apis mellifera]	Cfelprot80:comp45305_c0_seq1_1028_2455	Cfloprot:gi|752860604|ref|XP_011252776.1| PREDICTED: ubiquitin carboxyl-terminal hydrolase 30 homolog [Camponotus floridanus]	Sinvprot:gi|751200862|ref|XP_011164326.1| PREDICTED: ubiquitin carboxyl-terminal hydrolase 30 homolog [Solenopsis invicta]	uniprot-apis3AUP000005203:tr|A0A088AJE4|A0A088AJE4_APIME Uncharacterized protein OS=Apis mellifera GN=LOC409403 PE=4 SV=1	uniprot-cflo3AUP000000311:tr|E1ZW02|E1ZW02_CAMFO Ubiquitin carboxyl-terminal hydrolase 30 OS=Camponotus floridanus GN=EAG_05445 PE=4 SV=1	uniprot-sinv3AUP000006539:tr|E9IAB7|E9IAB7_SOLIN Putative uncharacterized protein (Fragment) OS=Solenopsis invicta GN=SINV_02608 PE=4 SV=1
OMA18771	Amelprot:gi|328788786|ref|XP_393417.3| PREDICTED: 39S ribosomal protein L12, mitochondrial [Apis mellifera]	Cfelprot80:comp42392_c0_seq1_396_937	Cfloprot:gi|752895332|ref|XP_011265883.1| PREDICTED: 39S ribosomal protein L12, mitochondrial isoform X2 [Camponotus floridanus]	Sinvprot:gi|751200870|ref|XP_011164374.1| PREDICTED: 39S ribosomal protein L12, mitochondrial [Solenopsis invicta]	uniprot-apis3AUP000005203:tr|A0A087ZQM3|A0A087ZQM3_APIME Uncharacterized protein OS=Apis mellifera GN=mRpL12 PE=4 SV=1	uniprot-cflo3AUP000000311:tr|E2AXN5|E2AXN5_CAMFO 39S ribosomal protein L12, mitochondrial OS=Camponotus floridanus GN=EAG_07831 PE=4 SV=1	uniprot-sinv3AUP000006539:tr|E9IAB9|E9IAB9_SOLIN Putative uncharacterized protein (Fragment) OS=Solenopsis invicta GN=SINV_07411 PE=4 SV=1
OMA04860	Amelprot:gi|66499617|ref|XP_396803.2| PREDICTED: protein tweety-like [Apis mellifera]	Cfelprot80:comp66215_c2_seq1_1882_2345	Cfloprot:gi|752895320|ref|XP_011265876.1| PREDICTED: protein tweety isoform X1 [Camponotus floridanus]	Sinvprot:gi|751200874|ref|XP_011164397.1| PREDICTED: protein tweety isoform X1 [Solenopsis invicta]	uniprot-apis3AUP000005203:tr|A0A087ZQJ3|A0A087ZQJ3_APIME Protein tweety homolog OS=Apis mellifera GN=LOC413358 PE=3 SV=1	uniprot-cflo3AUP000000311:tr|E2AXN3|E2AXN3_CAMFO Protein tweety homolog OS=Camponotus floridanus GN=EAG_07829 PE=3 SV=1	uniprot-sinv3AUP000006539:tr|E9IAC1|E9IAC1_SOLIN Protein tweety homolog (Fragment) OS=Solenopsis invicta GN=SINV_06861 PE=3 SV=1
OMA10371	Amelprot:gi|571557263|ref|XP_006558991.1| PREDICTED: yellow-e3 isoform X1 [Apis mellifera]	Cfelprot80:comp56367_c0_seq1_207_1492	Cfloprot:gi|752895312|ref|XP_011265872.1| PREDICTED: protein yellow-like [Camponotus floridanus]	Sinvprot:gi|751200891|ref|XP_011164481.1| PREDICTED: protein yellow-like isoform X2 [Solenopsis invicta]	uniprot-apis3AUP000005203:tr|A0A088AU18|A0A088AU18_APIME Uncharacterized protein OS=Apis mellifera GN=Y-e3 PE=4 SV=1	uniprot-cflo3AUP000000311:tr|E2AXM8|E2AXM8_CAMFO Protein yellow (Fragment) OS=Camponotus floridanus GN=EAG_07824 PE=4 SV=1	uniprot-sinv3AUP000006539:tr|E9IAC7|E9IAC7_SOLIN Putative uncharacterized protein (Fragment) OS=Solenopsis invicta GN=SINV_04426 PE=4 SV=1
OMA10685	Amelprot:gi|66499731|ref|XP_393599.2| PREDICTED: actin-related protein 3-like [Apis mellifera]	Cfelprot80:comp45687_c0_seq1_99_1341	Cfloprot:gi|752877014|ref|XP_011255930.1| PREDICTED: actin-related protein 3 [Camponotus floridanus]	Sinvprot:gi|751200914|ref|XP_011164592.1| PREDICTED: actin-related protein 3 [Solenopsis invicta]	uniprot-apis3AUP000005203:tr|A0A088A3M1|A0A088A3M1_APIME Uncharacterized protein OS=Apis mellifera GN=LOC410115 PE=3 SV=1	uniprot-cflo3AUP000000311:tr|E2ADA1|E2ADA1_CAMFO Actin-related protein 3 OS=Camponotus floridanus GN=EAG_05193 PE=3 SV=1	uniprot-sinv3AUP000006539:tr|E9IAD3|E9IAD3_SOLIN Putative uncharacterized protein (Fragment) OS=Solenopsis invicta GN=SINV_06666 PE=3 SV=1
OMA06488	Amelprot:gi|571503727|ref|XP_006568635.1| PREDICTED: transcription factor 25-like isoform X2 [Apis mellifera]	Cfelprot80:comp63327_c1_seq1_472_2152	Cfloprot:gi|752877012|ref|XP_011255929.1| PREDICTED: transcription factor 25 [Camponotus floridanus]	Sinvprot:gi|751200912|ref|XP_011164583.1| PREDICTED: transcription factor 25 [Solenopsis invicta]	uniprot-apis3AUP000005203:tr|A0A088A3J4|A0A088A3J4_APIME Uncharacterized protein OS=Apis mellifera GN=LOC410116 PE=4 SV=1	uniprot-cflo3AUP000000311:tr|E2ADA0|E2ADA0_CAMFO Transcription factor 25 OS=Camponotus floridanus GN=EAG_05192 PE=4 SV=1	uniprot-sinv3AUP000006539:tr|E9IAD4|E9IAD4_SOLIN Putative uncharacterized protein (Fragment) OS=Solenopsis invicta GN=SINV_01505 PE=4 SV=1
OMA02174	Amelprot:gi|571545613|ref|XP_006564756.1| PREDICTED: LOW QUALITY PROTEIN: patched domain-containing protein 3 [Apis mellifera]	Cfelprot80:comp59238_c0_seq1_401_3543	Cfloprot:gi|752860715|ref|XP_011253440.1| PREDICTED: patched domain-containing protein 3 [Camponotus floridanus]	Sinvprot:gi|751200930|ref|XP_011164677.1| PREDICTED: patched domain-containing protein 3 [Solenopsis invicta]	uniprot-apis3AUP000005203:tr|A0A087ZSR5|A0A087ZSR5_APIME Uncharacterized protein OS=Apis mellifera PE=4 SV=1	uniprot-cflo3AUP000000311:tr|E1ZW52|E1ZW52_CAMFO Patched domain-containing protein 3 OS=Camponotus floridanus GN=EAG_11083 PE=4 SV=1	uniprot-sinv3AUP000006539:tr|E9IAD8|E9IAD8_SOLIN Putative uncharacterized protein (Fragment) OS=Solenopsis invicta GN=SINV_13506 PE=4 SV=1
OMA07918	Amelprot:gi|328784849|ref|XP_392767.4| PREDICTED: acid phosphatase-like protein 2-like [Apis mellifera]	Cfelprot80:comp46549_c0_seq1_313_1879	Cfloprot:gi|752860709|ref|XP_011253412.1| PREDICTED: 2-phosphoxylose phosphatase 1 [Camponotus floridanus]	Sinvprot:gi|751200924|ref|XP_011164647.1| PREDICTED: 2-phosphoxylose phosphatase 1 isoform X2 [Solenopsis invicta]	uniprot-apis3AUP000005203:tr|A0A087ZSN3|A0A087ZSN3_APIME Uncharacterized protein OS=Apis mellifera GN=LOC409244 PE=4 SV=1	uniprot-cflo3AUP000000311:tr|E1ZW53|E1ZW53_CAMFO Acid phosphatase-like protein 2 OS=Camponotus floridanus GN=EAG_11084 PE=4 SV=1	uniprot-sinv3AUP000006539:tr|E9IAD9|E9IAD9_SOLIN Putative uncharacterized protein (Fragment) OS=Solenopsis invicta GN=SINV_12741 PE=4 SV=1
OMA13256	Amelprot:gi|571568782|ref|XP_006568101.1| PREDICTED: ATP-dependent (S)-NAD(P)H-hydrate dehydratase-like isoform X1 [Apis mellifera]	Cfelprot80:comp59044_c0_seq2_145_1083	Cfloprot:gi|752860735|ref|XP_011253542.1| PREDICTED: ATP-dependent (S)-NAD(P)H-hydrate dehydratase isoform X2 [Camponotus floridanus]	Sinvprot:gi|751200956|ref|XP_011164811.1| PREDICTED: ATP-dependent (S)-NAD(P)H-hydrate dehydratase [Solenopsis invicta]	uniprot-apis3AUP000005203:tr|A0A087ZNI5|A0A087ZNI5_APIME Uncharacterized protein OS=Apis mellifera GN=LOC550956 PE=3 SV=1	uniprot-cflo3AUP000000311:tr|E1ZW63|E1ZW63_CAMFO Uncharacterized protein FLJ10769-like protein OS=Camponotus floridanus GN=EAG_11095 PE=3 SV=1	uniprot-sinv3AUP000006539:tr|E9IAE6|E9IAE6_SOLIN Putative uncharacterized protein (Fragment) OS=Solenopsis invicta GN=SINV_03347 PE=3 SV=1
OMA11016	Amelprot:gi|571568018|ref|XP_006560473.1| PREDICTED: uncharacterized protein LOC408421 isoform X3 [Apis mellifera]	Cfelprot80:comp66570_c0_seq24_1_1207	Cfloprot:gi|752880763|ref|XP_011257962.1| PREDICTED: uncharacterized protein LOC105252332, partial [Camponotus floridanus]	Sinvprot:gi|751200973|ref|XP_011164905.1| PREDICTED: uncharacterized protein LOC105199456 [Solenopsis invicta]	uniprot-apis3AUP000005203:tr|A0A087ZN59|A0A087ZN59_APIME Uncharacterized protein OS=Apis mellifera GN=LOC408421 PE=4 SV=1	uniprot-cflo3AUP000000311:tr|E2AH36|E2AH36_CAMFO Putative uncharacterized protein OS=Camponotus floridanus GN=EAG_13529 PE=4 SV=1	uniprot-sinv3AUP000006539:tr|E9IAE7|E9IAE7_SOLIN Putative uncharacterized protein (Fragment) OS=Solenopsis invicta GN=SINV_08197 PE=4 SV=1
OMA19676	Amelprot:gi|328779916|ref|XP_625159.2| PREDICTED: H/ACA ribonucleoprotein complex subunit 2-like protein [Apis mellifera]	Cfelprot80:comp55963_c0_seq2_362_828	Cfloprot:gi|752892435|ref|XP_011264301.1| PREDICTED: H/ACA ribonucleoprotein complex subunit 2-like protein isoform X1 [Camponotus floridanus]	Sinvprot:gi|751201006|ref|XP_011165066.1| PREDICTED: H/ACA ribonucleoprotein complex subunit 2-like protein [Solenopsis invicta]	uniprot-apis3AUP000005203:tr|A0A088ADB0|A0A088ADB0_APIME Uncharacterized protein OS=Apis mellifera GN=NHP2 PE=4 SV=1	uniprot-cflo3AUP000000311:tr|E2AUQ3|E2AUQ3_CAMFO H/ACA ribonucleoprotein complex subunit 2-like protein OS=Camponotus floridanus GN=EAG_11801 PE=4 SV=1	uniprot-sinv3AUP000006539:tr|E9IAH3|E9IAH3_SOLIN Putative uncharacterized protein (Fragment) OS=Solenopsis invicta GN=SINV_14390 PE=4 SV=1
OMA04539	Amelprot:gi|328779913|ref|XP_396485.3| PREDICTED: rho-related BTB domain-containing protein 1 isoformX1 [Apis mellifera]	Cfelprot80:comp65726_c2_seq37_2989_3933	Cfloprot:gi|752892429|ref|XP_011264298.1| PREDICTED: rho-related BTB domain-containing protein 1 isoform X1 [Camponotus floridanus]	Sinvprot:gi|751201010|ref|XP_011165091.1| PREDICTED: rho-related BTB domain-containing protein 1 isoform X1 [Solenopsis invicta]	uniprot-apis3AUP000005203:tr|A0A088ADH9|A0A088ADH9_APIME Uncharacterized protein OS=Apis mellifera GN=RhoBTB PE=4 SV=1	uniprot-cflo3AUP000000311:tr|E2AUQ2|E2AUQ2_CAMFO Rho-related BTB domain-containing protein 1 OS=Camponotus floridanus GN=EAG_11800 PE=4 SV=1	uniprot-sinv3AUP000006539:tr|E9IAH5|E9IAH5_SOLIN Putative uncharacterized protein (Fragment) OS=Solenopsis invicta GN=SINV_08249 PE=4 SV=1
OMA08350	Amelprot:gi|328779938|ref|XP_003249724.1| PREDICTED: zinc finger protein 585A-like isoform X1 [Apis mellifera]	Cfelprot80:comp70111_c0_seq1_254_1590	Cfloprot:gi|752892413|ref|XP_011264289.1| PREDICTED: zinc finger protein Xfin-like [Camponotus floridanus]	Sinvprot:gi|751201038|ref|XP_011165211.1| PREDICTED: zinc finger protein 699-like [Solenopsis invicta]	uniprot-apis3AUP000005203:tr|A0A088ADH4|A0A088ADH4_APIME Uncharacterized protein OS=Apis mellifera GN=LOC100576221 PE=4 SV=1	uniprot-cflo3AUP000000311:tr|E2AUP9|E2AUP9_CAMFO Zinc finger protein 425 OS=Camponotus floridanus GN=EAG_11797 PE=4 SV=1	uniprot-sinv3AUP000006539:tr|E9IAI8|E9IAI8_SOLIN Putative uncharacterized protein (Fragment) OS=Solenopsis invicta GN=SINV_10182 PE=4 SV=1
OMA06075	Amelprot:gi|328783376|ref|XP_001121410.2| PREDICTED: exonuclease 3'-5' domain-containing protein 2-like isoform X1 [Apis mellifera]	Cfelprot80:comp34759_c0_seq1_579_2456	Cfloprot:gi|752892407|ref|XP_011264286.1| PREDICTED: exonuclease 3'-5' domain-containing protein 2 [Camponotus floridanus]	Sinvprot:gi|751201042|ref|XP_011165231.1| PREDICTED: exonuclease 3'-5' domain-containing protein 2 [Solenopsis invicta]	uniprot-apis3AUP000005203:tr|A0A088AEX8|A0A088AEX8_APIME Uncharacterized protein OS=Apis mellifera GN=LOC725586 PE=4 SV=1	uniprot-cflo3AUP000000311:tr|E2AUP8|E2AUP8_CAMFO Exonuclease 3'-5' domain-like-containing protein 2 OS=Camponotus floridanus GN=EAG_11796 PE=4 SV=1	uniprot-sinv3AUP000006539:tr|E9IAI9|E9IAI9_SOLIN Putative uncharacterized protein (Fragment) OS=Solenopsis invicta GN=SINV_07950 PE=4 SV=1
OMA20413	Amelprot:gi|571574829|ref|XP_006563595.1| PREDICTED: mitochondrial import inner membrane translocase subunit Tim16-like [Apis mellifera]	Cfelprot80:comp39973_c0_seq1_266_656	Cfloprot:gi|752892405|ref|XP_011264285.1| PREDICTED: mitochondrial import inner membrane translocase subunit Tim16-like [Camponotus floridanus]	Sinvprot:gi|751201040|ref|XP_011165219.1| PREDICTED: mitochondrial import inner membrane translocase subunit Tim16-like [Solenopsis invicta]	uniprot-apis3AUP000005203:tr|A0A088AFG1|A0A088AFG1_APIME Uncharacterized protein OS=Apis mellifera GN=LOC102655673 PE=4 SV=1	uniprot-cflo3AUP000000311:tr|E2AUP7|E2AUP7_CAMFO Mitochondrial import inner membrane translocase subunit Tim16 OS=Camponotus floridanus GN=EAG_11795 PE=4 SV=1	uniprot-sinv3AUP000006539:tr|E9IAJ0|E9IAJ0_SOLIN Putative uncharacterized protein (Fragment) OS=Solenopsis invicta GN=SINV_04332 PE=4 SV=1
OMA10152	Amelprot:gi|66525804|ref|XP_624354.1| PREDICTED: serine protease HTRA2, mitochondrial [Apis mellifera]	Cfelprot80:comp33712_c0_seq1_248_1427	Cfloprot:gi|752892391|ref|XP_011264277.1| PREDICTED: serine protease HTRA2, mitochondrial [Camponotus floridanus]	Sinvprot:gi|751201056|ref|XP_011165302.1| PREDICTED: serine protease HTRA2, mitochondrial isoform X2 [Solenopsis invicta]	uniprot-apis3AUP000005203:tr|A0A088AMU0|A0A088AMU0_APIME Uncharacterized protein OS=Apis mellifera GN=HtrA2 PE=4 SV=1	uniprot-cflo3AUP000000311:tr|E2AUP0|E2AUP0_CAMFO Serine protease HTRA2, mitochondrial OS=Camponotus floridanus GN=EAG_11788 PE=4 SV=1	uniprot-sinv3AUP000006539:tr|E9IAJ5|E9IAJ5_SOLIN Putative uncharacterized protein (Fragment) OS=Solenopsis invicta GN=SINV_10615 PE=4 SV=1
OMA01613	Amelprot:gi|571573752|ref|XP_006560152.1| PREDICTED: phosphatidylinositide phosphatase SAC2-like isoform X1 [Apis mellifera]	Cfelprot80:comp46214_c0_seq1_91_3373	Cfloprot:gi|752892385|ref|XP_011264273.1| PREDICTED: phosphatidylinositide phosphatase SAC2 isoform X1 [Camponotus floridanus]	Sinvprot:gi|751201060|ref|XP_011165329.1| PREDICTED: phosphatidylinositide phosphatase SAC2 [Solenopsis invicta]	uniprot-apis3AUP000005203:tr|A0A088AMT8|A0A088AMT8_APIME Uncharacterized protein OS=Apis mellifera GN=LOC408546 PE=4 SV=1	uniprot-cflo3AUP000000311:tr|E2AUN8|E2AUN8_CAMFO Phosphatidylinositide phosphatase SAC2 OS=Camponotus floridanus GN=EAG_11786 PE=4 SV=1	uniprot-sinv3AUP000006539:tr|E9IAK0|E9IAK0_SOLIN Putative uncharacterized protein (Fragment) OS=Solenopsis invicta GN=SINV_10164 PE=4 SV=1
OMA12482	Amelprot:gi|571573756|ref|XP_001121593.2| PREDICTED: ubiquitin-like domain-containing CTD phosphatase 1-like isoform 1 [Apis mellifera]	Cfelprot80:comp45481_c0_seq2_131_1121	Cfloprot:gi|752892382|ref|XP_011264272.1| PREDICTED: ubiquitin-like domain-containing CTD phosphatase 1 [Camponotus floridanus]	Sinvprot:gi|751201064|ref|XP_011165354.1| PREDICTED: ubiquitin-like domain-containing CTD phosphatase 1 [Solenopsis invicta]	uniprot-apis3AUP000005203:tr|A0A088AMT7|A0A088AMT7_APIME Uncharacterized protein OS=Apis mellifera GN=LOC725786 PE=4 SV=1	uniprot-cflo3AUP000000311:tr|E2AUN7|E2AUN7_CAMFO Ubiquitin-like domain-containing CTD phosphatase 1 OS=Camponotus floridanus GN=EAG_11785 PE=4 SV=1	uniprot-sinv3AUP000006539:tr|E9IAK2|E9IAK2_SOLIN Putative uncharacterized protein (Fragment) OS=Solenopsis invicta GN=SINV_10155 PE=4 SV=1
OMA13394	Amelprot:gi|218749841|ref|NP_001106142.2| uncharacterized protein LOC551408 [Apis mellifera]	Cfelprot80:comp59057_c0_seq3_200_1298	Cfloprot:gi|752881326|ref|XP_011258265.1| PREDICTED: multivesicular body subunit 12B [Camponotus floridanus]	Sinvprot:gi|751201092|ref|XP_011165528.1| PREDICTED: multivesicular body subunit 12B [Solenopsis invicta]	uniprot-apis3AUP000005203:tr|A0A088A6T6|A0A088A6T6_APIME Uncharacterized protein OS=Apis mellifera GN=LOC551408 PE=4 SV=1	uniprot-cflo3AUP000000311:tr|E2AHQ1|E2AHQ1_CAMFO Protein FAM125B OS=Camponotus floridanus GN=EAG_04324 PE=4 SV=1	uniprot-sinv3AUP000006539:tr|E9IAK4|E9IAK4_SOLIN Putative uncharacterized protein (Fragment) OS=Solenopsis invicta GN=SINV_01966 PE=4 SV=1
OMA03188	Amelprot:gi|571520285|ref|XP_006568451.1| PREDICTED: uncharacterized protein LOC724886 isoform X5 [Apis mellifera]	Cfelprot80:comp56406_c0_seq2_205_2865	Cfloprot:gi|752881318|ref|XP_011258261.1| PREDICTED: uncharacterized protein DDB_G0284459-like isoform X3 [Camponotus floridanus]	Sinvprot:gi|751201096|ref|XP_011165550.1| PREDICTED: uncharacterized protein LOC105199914 isoform X2 [Solenopsis invicta]	uniprot-apis3AUP000005203:tr|B4F7K7|B4F7K7_APIME Putative uncharacterized protein GB11211 OS=Apis mellifera GN=GB11211 PE=4 SV=1	uniprot-cflo3AUP000000311:tr|E2AHQ0|E2AHQ0_CAMFO Putative uncharacterized protein OS=Camponotus floridanus GN=EAG_04323 PE=4 SV=1	uniprot-sinv3AUP000006539:tr|E9IAK5|E9IAK5_SOLIN Putative uncharacterized protein (Fragment) OS=Solenopsis invicta GN=SINV_01802 PE=4 SV=1
OMA02055	Amelprot:gi|328791423|ref|XP_003251560.1| PREDICTED: symplekin [Apis mellifera]	Cfelprot80:comp58219_c1_seq2_285_3612	Cfloprot:gi|752878329|ref|XP_011256642.1| PREDICTED: symplekin [Camponotus floridanus]	Sinvprot:gi|751201142|ref|XP_011165784.1| PREDICTED: symplekin [Solenopsis invicta]	uniprot-apis3AUP000005203:tr|A0A087ZWE6|A0A087ZWE6_APIME Uncharacterized protein OS=Apis mellifera GN=Ame.8430 PE=4 SV=1	uniprot-cflo3AUP000000311:tr|E2AEE0|E2AEE0_CAMFO Symplekin OS=Camponotus floridanus GN=EAG_05084 PE=4 SV=1	uniprot-sinv3AUP000006539:tr|E9IAM5|E9IAM5_SOLIN Putative uncharacterized protein (Fragment) OS=Solenopsis invicta GN=SINV_80485 PE=4 SV=1
OMA07789	Amelprot:gi|110749336|ref|XP_001122415.1| PREDICTED: uncharacterized protein LOC726694 isoform X1 [Apis mellifera]	Cfelprot80:comp54434_c0_seq1_302_1843	Cfloprot:gi|752869921|ref|XP_011252090.1| PREDICTED: uncharacterized protein LOC105248798 isoform X2 [Camponotus floridanus]	Sinvprot:gi|751201170|ref|XP_011166008.1| PREDICTED: uncharacterized protein LOC105200243 isoform X1 [Solenopsis invicta]	uniprot-apis3AUP000005203:tr|A0A088A593|A0A088A593_APIME Uncharacterized protein OS=Apis mellifera GN=LOC726694 PE=4 SV=1	uniprot-cflo3AUP000000311:tr|E2A5U6|E2A5U6_CAMFO Putative uncharacterized protein OS=Camponotus floridanus GN=EAG_12785 PE=4 SV=1	uniprot-sinv3AUP000006539:tr|E9IAN4|E9IAN4_SOLIN Putative uncharacterized protein (Fragment) OS=Solenopsis invicta GN=SINV_06784 PE=4 SV=1
OMA15229	Amelprot:gi|571568181|ref|XP_006562805.1| PREDICTED: COP9 signalosome complex subunit 7-like isoform X4 [Apis mellifera]	Cfelprot80:comp46482_c0_seq3_219_1041	Cfloprot:gi|752892459|ref|XP_011264315.1| PREDICTED: COP9 signalosome complex subunit 7 isoform X1 [Camponotus floridanus]	Sinvprot:gi|751201190|ref|XP_011166080.1| PREDICTED: COP9 signalosome complex subunit 7 isoform X3 [Solenopsis invicta]	uniprot-apis3AUP000005203:tr|A0A088AQD2|A0A088AQD2_APIME Uncharacterized protein OS=Apis mellifera GN=LOC411843 PE=4 SV=1	uniprot-cflo3AUP000000311:tr|E2AUR1|E2AUR1_CAMFO COP9 signalosome complex subunit 7 OS=Camponotus floridanus GN=EAG_09782 PE=4 SV=1	uniprot-sinv3AUP000006539:tr|E9IAN8|E9IAN8_SOLIN Putative uncharacterized protein (Fragment) OS=Solenopsis invicta GN=SINV_15880 PE=4 SV=1
OMA08856	Amelprot:gi|571568291|ref|XP_006564109.1| PREDICTED: UNC93-like protein-like [Apis mellifera]	Cfelprot80:comp52895_c0_seq1_197_1577	Cfloprot:gi|752892465|ref|XP_011264318.1| PREDICTED: UNC93-like protein [Camponotus floridanus]	Sinvprot:gi|751201314|ref|XP_011166691.1| PREDICTED: UNC93-like protein [Solenopsis invicta]	uniprot-apis3AUP000005203:tr|A0A088A8U6|A0A088A8U6_APIME Uncharacterized protein OS=Apis mellifera GN=LOC100577567 PE=4 SV=1	uniprot-cflo3AUP000000311:tr|E2AUR7|E2AUR7_CAMFO UNC93-like protein OS=Camponotus floridanus GN=EAG_09788 PE=4 SV=1	uniprot-sinv3AUP000006539:tr|E9IAP3|E9IAP3_SOLIN Putative uncharacterized protein (Fragment) OS=Solenopsis invicta GN=SINV_01008 PE=4 SV=1
OMA05236	Amelprot:gi|571568285|ref|XP_006564108.1| PREDICTED: POU domain, class 6, transcription factor 2 isoform X2 [Apis mellifera]	Cfelprot80:comp60937_c0_seq3_580_2562	Cfloprot:gi|752892475|ref|XP_011264324.1| PREDICTED: POU domain, class 6, transcription factor 2 isoform X2 [Camponotus floridanus]	Sinvprot:gi|751201197|ref|XP_011166110.1| PREDICTED: POU domain, class 6, transcription factor 2 isoform X2 [Solenopsis invicta]	uniprot-apis3AUP000005203:tr|A0A088A8U3|A0A088A8U3_APIME Uncharacterized protein OS=Apis mellifera GN=pdm3 PE=4 SV=1	uniprot-cflo3AUP000000311:tr|E2AUR8|E2AUR8_CAMFO POU domain, class 6, transcription factor 2 OS=Camponotus floridanus GN=EAG_09789 PE=4 SV=1	uniprot-sinv3AUP000006539:tr|E9IAP4|E9IAP4_SOLIN Putative uncharacterized protein (Fragment) OS=Solenopsis invicta GN=SINV_00668 PE=4 SV=1
OMA09473	Amelprot:gi|328784100|ref|XP_001120814.2| PREDICTED: protein deadpan-like [Apis mellifera]	Cfelprot80:comp54452_c0_seq1_276_1651	Cfloprot:gi|752892479|ref|XP_011264326.1| PREDICTED: protein hairy-like [Camponotus floridanus]	Sinvprot:gi|751201201|ref|XP_011166130.1| PREDICTED: protein hairy-like [Solenopsis invicta]	uniprot-apis3AUP000005203:tr|A0A088A8T8|A0A088A8T8_APIME Uncharacterized protein OS=Apis mellifera GN=LOC724914 PE=4 SV=1	uniprot-cflo3AUP000000311:tr|E2AUS6|E2AUS6_CAMFO Protein deadpan OS=Camponotus floridanus GN=EAG_09797 PE=4 SV=1	uniprot-sinv3AUP000006539:tr|E9IAP7|E9IAP7_SOLIN Putative uncharacterized protein (Fragment) OS=Solenopsis invicta GN=SINV_02370 PE=4 SV=1
OMA01778	Amelprot:gi|571568312|ref|XP_006564112.1| PREDICTED: uncharacterized protein LOC410467 [Apis mellifera]	Cfelprot80:comp63093_c0_seq1_1_3126	Cfloprot:gi|752892483|ref|XP_011264329.1| PREDICTED: protein lev-9 [Camponotus floridanus]	Sinvprot:gi|751201210|ref|XP_011166206.1| PREDICTED: uncharacterized protein LOC105200377 [Solenopsis invicta]	uniprot-apis3AUP000005203:tr|A0A088A8T4|A0A088A8T4_APIME Uncharacterized protein OS=Apis mellifera GN=LOC410467 PE=4 SV=1	uniprot-cflo3AUP000000311:tr|E2AUT2|E2AUT2_CAMFO Sushi, von Willebrand factor type A, EGF and pentraxin domain-containing protein 1 OS=Camponotus floridanus GN=EAG_09803 PE=4 SV=1	uniprot-sinv3AUP000006539:tr|E9IAP9|E9IAP9_SOLIN Putative uncharacterized protein (Fragment) OS=Solenopsis invicta GN=SINV_08169 PE=4 SV=1
OMA19559	Amelprot:gi|571566464|ref|XP_006557935.1| PREDICTED: ornithine decarboxylase antizyme 1-like [Apis mellifera]	Cfelprot80:comp54885_c0_seq4_663_1188	Cfloprot:gi|752892540|ref|XP_011264361.1| PREDICTED: ornithine decarboxylase antizyme 1, partial [Camponotus floridanus]	Sinvprot:gi|751201322|ref|XP_011166741.1| PREDICTED: ornithine decarboxylase antizyme 1, partial [Solenopsis invicta]	uniprot-apis3AUP000005203:tr|A0A088ASU5|A0A088ASU5_APIME Uncharacterized protein OS=Apis mellifera GN=LOC100576851 PE=4 SV=1	uniprot-cflo3AUP000000311:tr|E2AUT8|E2AUT8_CAMFO Ornithine decarboxylase antizyme OS=Camponotus floridanus GN=EAG_09809 PE=4 SV=1	uniprot-sinv3AUP000006539:tr|E9IAQ3|E9IAQ3_SOLIN Putative uncharacterized protein (Fragment) OS=Solenopsis invicta GN=SINV_01629 PE=4 SV=1
OMA19746	Amelprot:gi|571566094|ref|XP_006557869.1| PREDICTED: myosin-2 essential light chain isoform X1 [Apis mellifera]	Cfelprot80:comp54367_c0_seq3_1123_1520	Cfloprot:gi|752892494|ref|XP_011264334.1| PREDICTED: myosin-2 essential light chain isoform X1 [Camponotus floridanus]	Sinvprot:gi|751201223|ref|XP_011166283.1| PREDICTED: myosin-2 essential light chain [Solenopsis invicta]	uniprot-apis3AUP000005203:tr|A0A088ASU4|A0A088ASU4_APIME Uncharacterized protein OS=Apis mellifera GN=Mlc-c PE=4 SV=1	uniprot-cflo3AUP000000311:tr|E2AUT9|E2AUT9_CAMFO Myosin-2 essential light chain OS=Camponotus floridanus GN=EAG_09810 PE=4 SV=1	uniprot-sinv3AUP000006539:tr|E9IAQ4|E9IAQ4_SOLIN Putative uncharacterized protein (Fragment) OS=Solenopsis invicta GN=SINV_04161 PE=4 SV=1
OMA20556	Amelprot:gi|328791703|ref|XP_003251619.1| PREDICTED: histone H3-like isoform 1 [Apis mellifera]	Cfelprot80:comp114693_c0_seq1_38_440	Cfloprot:gi|752864857|ref|XP_011268848.1| PREDICTED: histone H3 [Camponotus floridanus]	Sinvprot:gi|751201233|ref|XP_011166327.1| PREDICTED: histone H3 [Solenopsis invicta]	uniprot-apis3AUP000005203:tr|H9K244|H9K244_APIME Histone H3 OS=Apis mellifera GN=LOC726542 PE=3 SV=1	uniprot-cflo3AUP000000311:tr|E2A0J3|E2A0J3_CAMFO Histone H3 OS=Camponotus floridanus GN=EAG_09813 PE=3 SV=1	uniprot-sinv3AUP000006539:tr|E9IAQ7|E9IAQ7_SOLIN Histone H3 (Fragment) OS=Solenopsis invicta GN=SINV_16114 PE=3 SV=1
OMA16410	Amelprot:gi|571504693|ref|XP_006569695.1| PREDICTED: glutathione S-transferase omega-1 isoform X1 [Apis mellifera]	Cfelprot80:comp36384_c0_seq1_815_1133	Cfloprot:gi|752892528|ref|XP_011264354.1| PREDICTED: pyrimidodiazepine synthase-like isoform X1 [Camponotus floridanus]	Sinvprot:gi|751201257|ref|XP_011166456.1| PREDICTED: pyrimidodiazepine synthase-like [Solenopsis invicta]	uniprot-apis3AUP000005203:tr|A0A088A0S0|A0A088A0S0_APIME Uncharacterized protein OS=Apis mellifera GN=GstO1 PE=4 SV=1	uniprot-cflo3AUP000000311:tr|E2AUV2|E2AUV2_CAMFO Glutathione transferase omega-1 OS=Camponotus floridanus GN=EAG_09823 PE=4 SV=1	uniprot-sinv3AUP000006539:tr|E9IAR1|E9IAR1_SOLIN Putative uncharacterized protein (Fragment) OS=Solenopsis invicta GN=SINV_14968 PE=4 SV=1
OMA00564	Amelprot:gi|571541069|ref|XP_006569504.1| PREDICTED: microtubule-associated protein futsch-like isoform X5 [Apis mellifera]	Cfelprot80:comp65225_c5_seq11_1036_4437	Cfloprot:gi|752883646|ref|XP_011259532.1| PREDICTED: uncharacterized protein LOC105253289 [Camponotus floridanus]	Sinvprot:gi|751201264|ref|XP_011166495.1| PREDICTED: uncharacterized protein LOC105200555 isoform X2 [Solenopsis invicta]	uniprot-apis3AUP000005203:tr|A0A088A9V5|A0A088A9V5_APIME Uncharacterized protein OS=Apis mellifera GN=LOC100577498 PE=4 SV=1	uniprot-cflo3AUP000000311:tr|E2AJZ6|E2AJZ6_CAMFO Putative uncharacterized protein OS=Camponotus floridanus GN=EAG_10149 PE=4 SV=1	uniprot-sinv3AUP000006539:tr|E9IAR4|E9IAR4_SOLIN Putative uncharacterized protein (Fragment) OS=Solenopsis invicta GN=SINV_08257 PE=4 SV=1
OMA14126	Amelprot:gi|328788274|ref|XP_001120635.2| PREDICTED: PRKC apoptosis WT1 regulator protein-like isoform X1 [Apis mellifera]	Cfelprot80:comp63882_c1_seq4_1744_2049	Cfloprot:gi|752871528|ref|XP_011252966.1| PREDICTED: PRKC apoptosis WT1 regulator protein-like isoform X1 [Camponotus floridanus]	Sinvprot:gi|751201298|ref|XP_011166622.1| PREDICTED: PRKC apoptosis WT1 regulator protein-like isoform X1 [Solenopsis invicta]	uniprot-apis3AUP000005203:tr|A0A087ZZW7|A0A087ZZW7_APIME Uncharacterized protein OS=Apis mellifera GN=LOC724743 PE=4 SV=1	uniprot-cflo3AUP000000311:tr|E2A7M2|E2A7M2_CAMFO Putative uncharacterized protein OS=Camponotus floridanus GN=EAG_02803 PE=4 SV=1	uniprot-sinv3AUP000006539:tr|E9IAS0|E9IAS0_SOLIN Putative uncharacterized protein (Fragment) OS=Solenopsis invicta GN=SINV_02725 PE=4 SV=1
OMA17069	Amelprot:gi|66512193|ref|XP_392437.2| PREDICTED: probable NADH dehydrogenase [ubiquinone] iron-sulfur protein 7, mitochondrial isoform X2 [Apis mellifera]	Cfelprot80:comp54251_c0_seq1_236_839	Cfloprot:gi|752896470|ref|XP_011266494.1| PREDICTED: NADH-ubiquinone oxidoreductase 20 kDa subunit-like [Camponotus floridanus]	Sinvprot:gi|751201310|ref|XP_011166667.1| PREDICTED: NADH-ubiquinone oxidoreductase 20 kDa subunit-like [Solenopsis invicta]	uniprot-apis3AUP000005203:tr|A0A088A9V1|A0A088A9V1_APIME Uncharacterized protein OS=Apis mellifera GN=Ndufs7 PE=3 SV=1	uniprot-cflo3AUP000000311:tr|E2AYX9|E2AYX9_CAMFO NADH dehydrogenase [ubiquinone] iron-sulfur protein 7, mitochondrial OS=Camponotus floridanus GN=EAG_02004 PE=3 SV=1	uniprot-sinv3AUP000006539:tr|E9IAS5|E9IAS5_SOLIN Putative uncharacterized protein (Fragment) OS=Solenopsis invicta GN=SINV_15858 PE=3 SV=1
OMA10840	Amelprot:gi|571529923|ref|XP_006567864.1| PREDICTED: peptide chain release factor 1-like, mitochondrial-like [Apis mellifera]	Cfelprot80:comp62806_c0_seq1_105_1133	Cfloprot:gi|752884828|ref|XP_011260172.1| PREDICTED: peptide chain release factor 1-like, mitochondrial [Camponotus floridanus]	Sinvprot:gi|751201340|ref|XP_011166852.1| PREDICTED: peptide chain release factor 1-like, mitochondrial [Solenopsis invicta]	uniprot-apis3AUP000005203:tr|A0A087ZZV4|A0A087ZZV4_APIME Uncharacterized protein OS=Apis mellifera GN=LOC724133 PE=4 SV=1	uniprot-cflo3AUP000000311:tr|E2AL66|E2AL66_CAMFO Peptide chain release factor 1-like, mitochondrial OS=Camponotus floridanus GN=EAG_04646 PE=4 SV=1	uniprot-sinv3AUP000006539:tr|E9IAS9|E9IAS9_SOLIN Putative uncharacterized protein (Fragment) OS=Solenopsis invicta GN=SINV_03599 PE=4 SV=1
OMA05698	Amelprot:gi|571573460|ref|XP_006558361.1| PREDICTED: signal recognition particle subunit SRP72-like [Apis mellifera]	Cfelprot80:comp37708_c0_seq1_76_2042	Cfloprot:gi|752876846|ref|XP_011255838.1| PREDICTED: signal recognition particle subunit SRP72 [Camponotus floridanus]	Sinvprot:gi|751201347|ref|XP_011166899.1| PREDICTED: signal recognition particle subunit SRP72 [Solenopsis invicta]	uniprot-apis3AUP000005203:tr|A0A088A4L7|A0A088A4L7_APIME Signal recognition particle subunit SRP72 OS=Apis mellifera GN=LOC726435 PE=3 SV=1	uniprot-cflo3AUP000000311:tr|E2AD30|E2AD30_CAMFO Signal recognition particle subunit SRP72 OS=Camponotus floridanus GN=EAG_14965 PE=3 SV=1	uniprot-sinv3AUP000006539:tr|E9IAT5|E9IAT5_SOLIN Putative uncharacterized protein (Fragment) OS=Solenopsis invicta GN=SINV_01130 PE=4 SV=1
OMA11712	Amelprot:gi|58585160|ref|NP_001011606.1| opsin, blue-sensitive [Apis mellifera]	Cfelprot80:comp44215_c0_seq1_507_1314	Cfloprot:gi|752898782|ref|XP_011267759.1| PREDICTED: opsin, blue-sensitive [Camponotus floridanus]	Sinvprot:gi|751201367|ref|XP_011167017.1| PREDICTED: opsin, blue-sensitive [Solenopsis invicta]	uniprot-apis3AUP000005203:sp|P90680|OPSB_APIME Opsin, blue-sensitive OS=Apis mellifera GN=BLOP PE=1 SV=2	uniprot-cflo3AUP000000311:tr|E2B1M8|E2B1M8_CAMFO Opsin, blue-sensitive (Fragment) OS=Camponotus floridanus GN=EAG_02096 PE=3 SV=1	uniprot-sinv3AUP000006539:tr|E9IAU7|E9IAU7_SOLIN Putative uncharacterized protein (Fragment) OS=Solenopsis invicta GN=SINV_01756 PE=4 SV=1
OMA12564	Amelprot:gi|110763021|ref|XP_001122996.1| PREDICTED: transcription factor Sox-7-like isoform X1 [Apis mellifera]	Cfelprot80:comp27723_c0_seq1_1061_2008	Cfloprot:gi|752898830|ref|XP_011267784.1| PREDICTED: transcription factor SOX-14-like [Camponotus floridanus]	Sinvprot:gi|751201397|ref|XP_011167141.1| PREDICTED: transcription factor SOX-8 [Solenopsis invicta]	uniprot-apis3AUP000005203:tr|A0A087ZS64|A0A087ZS64_APIME Uncharacterized protein OS=Apis mellifera GN=LOC727287 PE=4 SV=1	uniprot-cflo3AUP000000311:tr|E2B1P3|E2B1P3_CAMFO Transcription factor SOX-8 OS=Camponotus floridanus GN=EAG_02111 PE=4 SV=1	uniprot-sinv3AUP000006539:tr|E9IAV3|E9IAV3_SOLIN Putative uncharacterized protein (Fragment) OS=Solenopsis invicta GN=SINV_04371 PE=4 SV=1
OMA04073	Amelprot:gi|571572819|ref|XP_006565723.1| PREDICTED: 85/88 kDa calcium-independent phospholipase A2-like [Apis mellifera]	Cfelprot80:comp59970_c0_seq1_154_2530	Cfloprot:gi|752898832|ref|XP_011267785.1| PREDICTED: 85/88 kDa calcium-independent phospholipase A2 isoform X1 [Camponotus floridanus]	Sinvprot:gi|751201395|ref|XP_011167129.1| PREDICTED: 85/88 kDa calcium-independent phospholipase A2 [Solenopsis invicta]	uniprot-apis3AUP000005203:tr|A0A087ZSA8|A0A087ZSA8_APIME Uncharacterized protein OS=Apis mellifera GN=LOC410570 PE=4 SV=1	uniprot-cflo3AUP000000311:tr|E2B1P4|E2B1P4_CAMFO 85 kDa calcium-independent phospholipase A2 OS=Camponotus floridanus GN=EAG_02112 PE=4 SV=1	uniprot-sinv3AUP000006539:tr|E9IAV4|E9IAV4_SOLIN Putative uncharacterized protein (Fragment) OS=Solenopsis invicta GN=SINV_11178 PE=4 SV=1
OMA02148	Amelprot:gi|328786138|ref|XP_394050.4| PREDICTED: DNA topoisomerase 3-alpha-like [Apis mellifera]	Cfelprot80:comp60571_c0_seq1_2239_3572	Cfloprot:gi|752870814|ref|XP_011252576.1| PREDICTED: DNA topoisomerase 3-alpha [Camponotus floridanus]	Sinvprot:gi|751201401|ref|XP_011167166.1| PREDICTED: DNA topoisomerase 3-alpha [Solenopsis invicta]	uniprot-apis3AUP000005203:tr|A0A087ZSA7|A0A087ZSA7_APIME DNA topoisomerase OS=Apis mellifera GN=LOC410571 PE=3 SV=1	uniprot-cflo3AUP000000311:tr|E2A6W4|E2A6W4_CAMFO DNA topoisomerase OS=Camponotus floridanus GN=EAG_02503 PE=3 SV=1	uniprot-sinv3AUP000006539:tr|E9IAV6|E9IAV6_SOLIN DNA topoisomerase (Fragment) OS=Solenopsis invicta GN=SINV_07705 PE=3 SV=1
OMA03267	Amelprot:gi|571572777|ref|XP_006565707.1| PREDICTED: DIS3-like exonuclease 2-like isoform X1 [Apis mellifera]	Cfelprot80:comp64455_c0_seq4_1045_2961	Cfloprot:gi|752870806|ref|XP_011252572.1| PREDICTED: DIS3-like exonuclease 2 isoform X1 [Camponotus floridanus]	Sinvprot:gi|751201405|ref|XP_011167192.1| PREDICTED: DIS3-like exonuclease 2 [Solenopsis invicta]	uniprot-apis3AUP000005203:tr|A0A087ZSA6|A0A087ZSA6_APIME Uncharacterized protein OS=Apis mellifera GN=LOC552355 PE=4 SV=1	uniprot-cflo3AUP000000311:tr|E2A6W2|E2A6W2_CAMFO DIS3-like exonuclease 2 OS=Camponotus floridanus GN=EAG_02501 PE=4 SV=1	uniprot-sinv3AUP000006539:tr|E9IAV8|E9IAV8_SOLIN Putative uncharacterized protein (Fragment) OS=Solenopsis invicta GN=SINV_03936 PE=3 SV=1
OMA05433	Amelprot:gi|66564556|ref|XP_395807.2| PREDICTED: vacuolar protein sorting-associated protein 52 homolog isoform 1 [Apis mellifera]	Cfelprot80:comp63933_c0_seq2_193_2075	Cfloprot:gi|752870804|ref|XP_011252571.1| PREDICTED: vacuolar protein sorting-associated protein 52 homolog [Camponotus floridanus]	Sinvprot:gi|751201411|ref|XP_011167221.1| PREDICTED: vacuolar protein sorting-associated protein 52 homolog [Solenopsis invicta]	uniprot-apis3AUP000005203:tr|A0A088A6L7|A0A088A6L7_APIME Uncharacterized protein OS=Apis mellifera GN=LOC412346 PE=4 SV=1	uniprot-cflo3AUP000000311:tr|E2A6W1|E2A6W1_CAMFO Vacuolar protein sorting-associated protein 52-like protein OS=Camponotus floridanus GN=EAG_02500 PE=4 SV=1	uniprot-sinv3AUP000006539:tr|E9IAV9|E9IAV9_SOLIN Putative uncharacterized protein (Fragment) OS=Solenopsis invicta GN=SINV_01553 PE=4 SV=1
OMA04896	Amelprot:gi|571571044|ref|XP_006563047.1| PREDICTED: activating signal cointegrator 1 complex subunit 2-like isoform X1 [Apis mellifera]	Cfelprot80:comp45362_c0_seq1_333_2510	Cfloprot:gi|752870796|ref|XP_011252566.1| PREDICTED: activating signal cointegrator 1 complex subunit 2 isoform X2 [Camponotus floridanus]	Sinvprot:gi|751201419|ref|XP_011167255.1| PREDICTED: activating signal cointegrator 1 complex subunit 2 [Solenopsis invicta]	uniprot-apis3AUP000005203:tr|A0A088AR41|A0A088AR41_APIME Uncharacterized protein OS=Apis mellifera GN=LOC100578931 PE=4 SV=1	uniprot-cflo3AUP000000311:tr|E2A6V6|E2A6V6_CAMFO Activating signal cointegrator 1 complex subunit 2 OS=Camponotus floridanus GN=EAG_02495 PE=4 SV=1	uniprot-sinv3AUP000006539:tr|E9IAW0|E9IAW0_SOLIN Putative uncharacterized protein (Fragment) OS=Solenopsis invicta GN=SINV_03926 PE=4 SV=1
OMA15623	Amelprot:gi|328782750|ref|XP_001121406.2| PREDICTED: bridging integrator 3 homolog [Apis mellifera]	Cfelprot80:comp60504_c0_seq1_169_922	Cfloprot:gi|752870792|ref|XP_011252564.1| PREDICTED: bridging integrator 3 homolog [Camponotus floridanus]	Sinvprot:gi|751201413|ref|XP_011167230.1| PREDICTED: bridging integrator 3-like [Solenopsis invicta]	uniprot-apis3AUP000005203:tr|A0A088ARA1|A0A088ARA1_APIME Uncharacterized protein OS=Apis mellifera GN=LOC725583 PE=4 SV=1	uniprot-cflo3AUP000000311:tr|E2A6V5|E2A6V5_CAMFO Bridging integrator 3-like protein OS=Camponotus floridanus GN=EAG_02494 PE=4 SV=1	uniprot-sinv3AUP000006539:tr|E9IAW1|E9IAW1_SOLIN Putative uncharacterized protein (Fragment) OS=Solenopsis invicta GN=SINV_03552 PE=4 SV=1
OMA04101	Amelprot:gi|571575247|ref|XP_006563745.1| PREDICTED: transitional endoplasmic reticulum ATPase TER94 [Apis mellifera]	Cfelprot80:comp66879_c0_seq1_2473_2637	Cfloprot:gi|752887219|ref|XP_011261476.1| PREDICTED: transitional endoplasmic reticulum ATPase TER94 [Camponotus floridanus]	Sinvprot:gi|751201451|ref|XP_011167409.1| PREDICTED: transitional endoplasmic reticulum ATPase TER94 [Solenopsis invicta]	uniprot-apis3AUP000005203:tr|A0A088AFM4|A0A088AFM4_APIME Uncharacterized protein OS=Apis mellifera GN=TER94 PE=3 SV=1	uniprot-cflo3AUP000000311:tr|E2AP42|E2AP42_CAMFO Transitional endoplasmic reticulum ATPase TER94 OS=Camponotus floridanus GN=EAG_03895 PE=3 SV=1	uniprot-sinv3AUP000006539:tr|E9IAW4|E9IAW4_SOLIN Putative uncharacterized protein (Fragment) OS=Solenopsis invicta GN=SINV_06607 PE=3 SV=1
OMA12717	Amelprot:gi|66548758|ref|XP_393438.2| PREDICTED: V-type proton ATPase subunit d isoform X2 [Apis mellifera]	Cfelprot80:comp36993_c0_seq1_185_1196	Cfloprot:gi|752868099|ref|XP_011251109.1| PREDICTED: V-type proton ATPase subunit d [Camponotus floridanus]	Sinvprot:gi|751201473|ref|XP_011167520.1| PREDICTED: V-type proton ATPase subunit d [Solenopsis invicta]	uniprot-apis3AUP000005203:tr|A0A088A285|A0A088A285_APIME Uncharacterized protein OS=Apis mellifera GN=VhaAC39 PE=4 SV=1	uniprot-cflo3AUP000000311:tr|E2A3W4|E2A3W4_CAMFO Vacuolar proton pump subunit d OS=Camponotus floridanus GN=EAG_07201 PE=4 SV=1	uniprot-sinv3AUP000006539:tr|E9IAW9|E9IAW9_SOLIN Putative uncharacterized protein (Fragment) OS=Solenopsis invicta GN=SINV_00911 PE=4 SV=1
OMA06002	Amelprot:gi|571555616|ref|XP_006569199.1| PREDICTED: bifunctional 3'-phosphoadenosine 5'-phosphosulfate synthase-like [Apis mellifera]	Cfelprot80:comp55333_c0_seq1_176_2039	Cfloprot:gi|752868607|ref|XP_011251382.1| PREDICTED: bifunctional 3'-phosphoadenosine 5'-phosphosulfate synthase-like [Camponotus floridanus]	Sinvprot:gi|751201477|ref|XP_011167541.1| PREDICTED: bifunctional 3'-phosphoadenosine 5'-phosphosulfate synthase-like, partial [Solenopsis invicta]	uniprot-apis3AUP000005203:tr|A0A088ABI6|A0A088ABI6_APIME Uncharacterized protein OS=Apis mellifera GN=LOC409460 PE=3 SV=1	uniprot-cflo3AUP000000311:tr|E2A4B5|E2A4B5_CAMFO Bifunctional 3'-phosphoadenosine 5'-phosphosulfate synthetase OS=Camponotus floridanus GN=EAG_05805 PE=3 SV=1	uniprot-sinv3AUP000006539:tr|E9IAX0|E9IAX0_SOLIN Putative uncharacterized protein (Fragment) OS=Solenopsis invicta GN=SINV_13211 PE=3 SV=1
OMA05787	Amelprot:gi|571520045|ref|XP_006568029.1| PREDICTED: mediator of RNA polymerase II transcription subunit 15 isoform X2 [Apis mellifera]	Cfelprot80:comp56791_c0_seq1_110_1994	Cfloprot:gi|752895631|ref|XP_011266046.1| PREDICTED: mediator of RNA polymerase II transcription subunit 15 [Camponotus floridanus]	Sinvprot:gi|751201521|ref|XP_011167758.1| PREDICTED: mediator of RNA polymerase II transcription subunit 15 isoform X1 [Solenopsis invicta]	uniprot-apis3AUP000005203:tr|A0A088ACJ0|A0A088ACJ0_APIME Uncharacterized protein OS=Apis mellifera GN=MED15 PE=4 SV=1	uniprot-cflo3AUP000000311:tr|E2AY79|E2AY79_CAMFO Mediator of RNA polymerase II transcription subunit 15 OS=Camponotus floridanus GN=EAG_05918 PE=4 SV=1	uniprot-sinv3AUP000006539:tr|E9IAY5|E9IAY5_SOLIN Putative uncharacterized protein (Fragment) OS=Solenopsis invicta GN=SINV_09503 PE=4 SV=1
OMA11837	Amelprot:gi|48104556|ref|XP_395802.1| PREDICTED: alpha-methylacyl-CoA racemase-like [Apis mellifera]	Cfelprot80:comp64056_c0_seq1_231_1224	Cfloprot:gi|752895643|ref|XP_011266052.1| PREDICTED: alpha-methylacyl-CoA racemase isoform X1 [Camponotus floridanus]	Sinvprot:gi|751201525|ref|XP_011167791.1| PREDICTED: alpha-methylacyl-CoA racemase isoform X1 [Solenopsis invicta]	uniprot-apis3AUP000005203:tr|A0A088A6E2|A0A088A6E2_APIME Uncharacterized protein OS=Apis mellifera GN=LOC412341 PE=4 SV=1	uniprot-cflo3AUP000000311:tr|E2AY80|E2AY80_CAMFO Alpha-methylacyl-CoA racemase OS=Camponotus floridanus GN=EAG_05919 PE=4 SV=1	uniprot-sinv3AUP000006539:tr|E9IAY6|E9IAY6_SOLIN Putative uncharacterized protein (Fragment) OS=Solenopsis invicta GN=SINV_12583 PE=4 SV=1
OMA13622	Amelprot:gi|571537013|ref|XP_006571029.1| PREDICTED: protein phosphatase 1 regulatory subunit 7 [Apis mellifera]	Cfelprot80:comp67429_c0_seq1_577_1525	Cfloprot:gi|752895633|ref|XP_011266047.1| PREDICTED: protein phosphatase 1 regulatory subunit 7 [Camponotus floridanus]	Sinvprot:gi|751201531|ref|XP_011167818.1| PREDICTED: protein phosphatase 1 regulatory subunit 7 [Solenopsis invicta]	uniprot-apis3AUP000005203:tr|A0A088A298|A0A088A298_APIME Uncharacterized protein OS=Apis mellifera GN=sds22 PE=4 SV=1	uniprot-cflo3AUP000000311:tr|E2AY81|E2AY81_CAMFO Protein phosphatase 1 regulatory subunit 7 OS=Camponotus floridanus GN=EAG_05920 PE=4 SV=1	uniprot-sinv3AUP000006539:tr|E9IAY7|E9IAY7_SOLIN Putative uncharacterized protein (Fragment) OS=Solenopsis invicta GN=SINV_14234 PE=4 SV=1
OMA01886	Amelprot:gi|328792060|ref|XP_001120416.2| PREDICTED: DNA-directed RNA polymerase I subunit RPA2 isoform X1 [Apis mellifera]	Cfelprot80:comp55873_c0_seq2_123_3433	Cfloprot:gi|752895655|ref|XP_011266059.1| PREDICTED: DNA-directed RNA polymerase I subunit RPA2 [Camponotus floridanus]	Sinvprot:gi|751201543|ref|XP_011167868.1| PREDICTED: DNA-directed RNA polymerase I subunit RPA2 [Solenopsis invicta]	uniprot-apis3AUP000005203:tr|A0A088A2A1|A0A088A2A1_APIME DNA-directed RNA polymerase OS=Apis mellifera GN=RpI135 PE=3 SV=1	uniprot-cflo3AUP000000311:tr|E2AY84|E2AY84_CAMFO DNA-directed RNA polymerase OS=Camponotus floridanus GN=EAG_05923 PE=3 SV=1	uniprot-sinv3AUP000006539:tr|E9IAZ0|E9IAZ0_SOLIN DNA-directed RNA polymerase (Fragment) OS=Solenopsis invicta GN=SINV_10883 PE=3 SV=1
OMA07619	Amelprot:gi|571521603|ref|XP_006570226.1| PREDICTED: LOW QUALITY PROTEIN: NEDD8-activating enzyme E1 regulatory subunit [Apis mellifera]	Cfelprot80:comp44609_c0_seq1_130_1686	Cfloprot:gi|752895661|ref|XP_011266062.1| PREDICTED: NEDD8-activating enzyme E1 regulatory subunit [Camponotus floridanus]	Sinvprot:gi|751201545|ref|XP_011167881.1| PREDICTED: NEDD8-activating enzyme E1 regulatory subunit [Solenopsis invicta]	uniprot-apis3AUP000005203:tr|A0A088AGN2|A0A088AGN2_APIME Uncharacterized protein OS=Apis mellifera GN=APP-BP1 PE=4 SV=1	uniprot-cflo3AUP000000311:tr|E2AY86|E2AY86_CAMFO NEDD8-activating enzyme E1 regulatory subunit OS=Camponotus floridanus GN=EAG_05925 PE=4 SV=1	uniprot-sinv3AUP000006539:tr|E9IAZ2|E9IAZ2_SOLIN Putative uncharacterized protein (Fragment) OS=Solenopsis invicta GN=SINV_00190 PE=4 SV=1
OMA01479	Amelprot:gi|571520356|ref|XP_006568462.1| PREDICTED: probable Ras GTPase-activating protein-like isoform X6 [Apis mellifera]	Cfelprot80:comp65197_c0_seq1_1_3399	Cfloprot:gi|752873989|ref|XP_011254298.1| PREDICTED: probable Ras GTPase-activating protein isoform X2 [Camponotus floridanus]	Sinvprot:gi|751201551|ref|XP_011167906.1| PREDICTED: probable Ras GTPase-activating protein isoform X2 [Solenopsis invicta]	uniprot-apis3AUP000005203:tr|A0A088A6S7|A0A088A6S7_APIME Uncharacterized protein OS=Apis mellifera GN=LOC724344 PE=4 SV=1	uniprot-cflo3AUP000000311:tr|E2AA57|E2AA57_CAMFO Probable Ras GTPase-activating protein OS=Camponotus floridanus GN=EAG_11825 PE=4 SV=1	uniprot-sinv3AUP000006539:tr|E9IAZ9|E9IAZ9_SOLIN Putative uncharacterized protein (Fragment) OS=Solenopsis invicta GN=SINV_00277 PE=4 SV=1
OMA10861	Amelprot:gi|66505538|ref|XP_396374.2| PREDICTED: argininosuccinate synthase-like [Apis mellifera]	Cfelprot80:comp62498_c1_seq2_1252_2395	Cfloprot:gi|752873979|ref|XP_011254293.1| PREDICTED: argininosuccinate synthase [Camponotus floridanus]	Sinvprot:gi|751201565|ref|XP_011167967.1| PREDICTED: argininosuccinate synthase isoform X1 [Solenopsis invicta]	uniprot-apis3AUP000005203:tr|A0A088ACI2|A0A088ACI2_APIME Uncharacterized protein OS=Apis mellifera GN=LOC412923 PE=3 SV=1	uniprot-cflo3AUP000000311:tr|E2AA51|E2AA51_CAMFO Argininosuccinate synthase OS=Camponotus floridanus GN=EAG_11819 PE=3 SV=1	uniprot-sinv3AUP000006539:tr|E9IB02|E9IB02_SOLIN Putative uncharacterized protein (Fragment) OS=Solenopsis invicta GN=SINV_80105 PE=3 SV=1
OMA08596	Amelprot:gi|66537734|ref|XP_624867.1| PREDICTED: BTB/POZ domain-containing protein 17 isoform X2 [Apis mellifera]	Cfelprot80:comp59302_c0_seq1_502_1959	Cfloprot:gi|752898477|ref|XP_011267594.1| PREDICTED: BTB/POZ domain-containing protein 17 [Camponotus floridanus]	Sinvprot:gi|751201603|ref|XP_011168128.1| PREDICTED: BTB/POZ domain-containing protein 17 [Solenopsis invicta]	uniprot-apis3AUP000005203:tr|A0A087ZYM3|A0A087ZYM3_APIME Uncharacterized protein OS=Apis mellifera GN=Tango10 PE=4 SV=1	uniprot-cflo3AUP000000311:tr|E2B192|E2B192_CAMFO BTB/POZ and BACK domain-containing protein LOC388419-like protein OS=Camponotus floridanus GN=EAG_12248 PE=4 SV=1	uniprot-sinv3AUP000006539:tr|E9IB10|E9IB10_SOLIN Putative uncharacterized protein (Fragment) OS=Solenopsis invicta GN=SINV_15767 PE=4 SV=1
OMA03293	Amelprot:gi|571523345|ref|XP_006562064.1| PREDICTED: serine/threonine-protein kinase PRP4 homolog isoform X1 [Apis mellifera]	Cfelprot80:comp64832_c0_seq2_2055_2887	Cfloprot:gi|752898454|ref|XP_011267582.1| PREDICTED: serine/arginine repetitive matrix protein 1-like isoform X1 [Camponotus floridanus]	Sinvprot:gi|751201659|ref|XP_011168420.1| PREDICTED: serine/threonine-protein kinase PRP4 homolog, partial [Solenopsis invicta]	uniprot-apis3AUP000005203:tr|A0A088AW26|A0A088AW26_APIME Uncharacterized protein OS=Apis mellifera GN=LOC726726 PE=4 SV=1	uniprot-cflo3AUP000000311:tr|E2B189|E2B189_CAMFO Putative uncharacterized protein OS=Camponotus floridanus GN=EAG_12245 PE=4 SV=1	uniprot-sinv3AUP000006539:tr|E9IB13|E9IB13_SOLIN Putative uncharacterized protein (Fragment) OS=Solenopsis invicta GN=SINV_15391 PE=4 SV=1
OMA12147	Amelprot:gi|328787116|ref|XP_392845.4| PREDICTED: mannose-1-phosphate guanyltransferase beta-like [Apis mellifera]	Cfelprot80:comp45670_c0_seq1_751_1856	Cfloprot:gi|752893604|ref|XP_011264949.1| PREDICTED: mannose-1-phosphate guanyltransferase beta isoform X2 [Camponotus floridanus]	Sinvprot:gi|751201672|ref|XP_011168503.1| PREDICTED: mannose-1-phosphate guanyltransferase beta [Solenopsis invicta]	uniprot-apis3AUP000005203:tr|A0A088A202|A0A088A202_APIME Uncharacterized protein OS=Apis mellifera GN=LOC409329 PE=4 SV=1	uniprot-cflo3AUP000000311:tr|E2AVX3|E2AVX3_CAMFO Mannose-1-phosphate guanyltransferase beta OS=Camponotus floridanus GN=EAG_01585 PE=4 SV=1	uniprot-sinv3AUP000006539:tr|E9IB22|E9IB22_SOLIN Putative uncharacterized protein (Fragment) OS=Solenopsis invicta GN=SINV_10699 PE=4 SV=1
OMA09226	Amelprot:gi|66561608|ref|XP_624349.1| PREDICTED: UDP-N-acetylhexosamine pyrophosphorylase [Apis mellifera]	Cfelprot80:comp62896_c0_seq1_1614_3035	Cfloprot:gi|752894822|ref|XP_011265605.1| PREDICTED: UDP-N-acetylhexosamine pyrophosphorylase [Camponotus floridanus]	Sinvprot:gi|751201676|ref|XP_011168529.1| PREDICTED: UDP-N-acetylhexosamine pyrophosphorylase [Solenopsis invicta]	uniprot-apis3AUP000005203:tr|A0A088A111|A0A088A111_APIME Uncharacterized protein OS=Apis mellifera GN=mmy PE=4 SV=1	uniprot-cflo3AUP000000311:tr|E2AX38|E2AX38_CAMFO UDP-N-acetylhexosamine pyrophosphorylase OS=Camponotus floridanus GN=EAG_01741 PE=4 SV=1	uniprot-sinv3AUP000006539:tr|E9IB23|E9IB23_SOLIN Putative uncharacterized protein (Fragment) OS=Solenopsis invicta GN=SINV_04391 PE=4 SV=1
OMA01691	Amelprot:gi|571504902|ref|XP_006570081.1| PREDICTED: flocculation protein FLO11 isoform X1 [Apis mellifera]	Cfelprot80:comp61137_c1_seq1_168_3784	Cfloprot:gi|752893840|ref|XP_011265076.1| PREDICTED: mucin-17 isoform X2 [Camponotus floridanus]	Sinvprot:gi|751201682|ref|XP_011168560.1| PREDICTED: mucin-19 [Solenopsis invicta]	uniprot-apis3AUP000005203:tr|A0A088A5A4|A0A088A5A4_APIME Uncharacterized protein OS=Apis mellifera GN=Chro PE=4 SV=1	uniprot-cflo3AUP000000311:tr|E2AW31|E2AW31_CAMFO Putative uncharacterized protein OS=Camponotus floridanus GN=EAG_01644 PE=4 SV=1	uniprot-sinv3AUP000006539:tr|E9IB27|E9IB27_SOLIN Putative uncharacterized protein (Fragment) OS=Solenopsis invicta GN=SINV_08548 PE=4 SV=1
OMA06503	Amelprot:gi|571504877|ref|XP_006570076.1| PREDICTED: high affinity cationic amino acid transporter 1-like isoform X1 [Apis mellifera]	Cfelprot80:comp63312_c0_seq11_1257_1928	Cfloprot:gi|752893842|ref|XP_011265078.1| PREDICTED: cationic amino acid transporter 3 [Camponotus floridanus]	Sinvprot:gi|751201703|ref|XP_011168673.1| PREDICTED: cationic amino acid transporter 3 isoform X1 [Solenopsis invicta]	uniprot-apis3AUP000005203:tr|A0A088A576|A0A088A576_APIME Uncharacterized protein OS=Apis mellifera GN=LOC409646 PE=4 SV=1	uniprot-cflo3AUP000000311:tr|E2AW33|E2AW33_CAMFO Cationic amino acid transporter 3 OS=Camponotus floridanus GN=EAG_01646 PE=4 SV=1	uniprot-sinv3AUP000006539:tr|E9IB29|E9IB29_SOLIN Putative uncharacterized protein (Fragment) OS=Solenopsis invicta GN=SINV_08605 PE=4 SV=1
OMA01113	Amelprot:gi|66549049|ref|XP_395686.2| PREDICTED: tectonin beta-propeller repeat-containing protein isoform X2 [Apis mellifera]	Cfelprot80:comp64379_c0_seq2_649_4545	Cfloprot:gi|752893844|ref|XP_011265079.1| PREDICTED: tectonin beta-propeller repeat-containing protein isoform X1 [Camponotus floridanus]	Sinvprot:gi|751201695|ref|XP_011168634.1| PREDICTED: tectonin beta-propeller repeat-containing protein isoform X1 [Solenopsis invicta]	uniprot-apis3AUP000005203:tr|A0A088A5A3|A0A088A5A3_APIME Uncharacterized protein OS=Apis mellifera GN=galectin2 PE=4 SV=1	uniprot-cflo3AUP000000311:tr|E2AW34|E2AW34_CAMFO UPF0584 protein CG32226 OS=Camponotus floridanus GN=EAG_01647 PE=4 SV=1	uniprot-sinv3AUP000006539:tr|E9IB30|E9IB30_SOLIN Putative uncharacterized protein (Fragment) OS=Solenopsis invicta GN=SINV_06951 PE=4 SV=1
OMA03300	Amelprot:gi|328791415|ref|XP_001122322.2| PREDICTED: exocyst complex component 2 [Apis mellifera]	Cfelprot80:comp55149_c0_seq3_136_2700	Cfloprot:gi|752893848|ref|XP_011265081.1| PREDICTED: exocyst complex component 2 [Camponotus floridanus]	Sinvprot:gi|751201693|ref|XP_011168624.1| PREDICTED: exocyst complex component 2 [Solenopsis invicta]	uniprot-apis3AUP000005203:tr|A0A087ZWE5|A0A087ZWE5_APIME Uncharacterized protein OS=Apis mellifera GN=sec5 PE=4 SV=1	uniprot-cflo3AUP000000311:tr|E2AW35|E2AW35_CAMFO Exocyst complex component 2 OS=Camponotus floridanus GN=EAG_01648 PE=4 SV=1	uniprot-sinv3AUP000006539:tr|E9IB31|E9IB31_SOLIN Putative uncharacterized protein (Fragment) OS=Solenopsis invicta GN=SINV_04460 PE=4 SV=1
OMA11543	Amelprot:gi|571562354|ref|XP_006570364.1| PREDICTED: minor histocompatibility antigen H13-like [Apis mellifera]	Cfelprot80:comp36480_c0_seq1_75_1155	Cfloprot:gi|752893865|ref|XP_011265091.1| PREDICTED: minor histocompatibility antigen H13 [Camponotus floridanus]	Sinvprot:gi|751201715|ref|XP_011168740.1| PREDICTED: minor histocompatibility antigen H13 [Solenopsis invicta]	uniprot-apis3AUP000005203:tr|A0A087ZWE0|A0A087ZWE0_APIME Uncharacterized protein OS=Apis mellifera GN=LOC409870 PE=4 SV=1	uniprot-cflo3AUP000000311:tr|E2AW41|E2AW41_CAMFO Minor histocompatibility antigen H13 OS=Camponotus floridanus GN=EAG_01654 PE=4 SV=1	uniprot-sinv3AUP000006539:tr|E9IB36|E9IB36_SOLIN Putative uncharacterized protein (Fragment) OS=Solenopsis invicta GN=SINV_02855 PE=4 SV=1
OMA07855	Amelprot:gi|48116262|ref|XP_393186.1| PREDICTED: U4/U6 small nuclear ribonucleoprotein Prp4 [Apis mellifera]	Cfelprot80:comp60189_c0_seq1_502_2045	Cfloprot:gi|752895243|ref|XP_011265834.1| PREDICTED: U4/U6 small nuclear ribonucleoprotein Prp4 [Camponotus floridanus]	Sinvprot:gi|751201723|ref|XP_011168785.1| PREDICTED: U4/U6 small nuclear ribonucleoprotein Prp4 [Solenopsis invicta]	uniprot-apis3AUP000005203:tr|A0A088A7Q7|A0A088A7Q7_APIME Uncharacterized protein OS=Apis mellifera GN=PRPF4 PE=4 SV=1	uniprot-cflo3AUP000000311:tr|E2AXK2|E2AXK2_CAMFO U4/U6 small nuclear ribonucleoprotein Prp4 OS=Camponotus floridanus GN=EAG_10747 PE=4 SV=1	uniprot-sinv3AUP000006539:tr|E9IB39|E9IB39_SOLIN Putative uncharacterized protein (Fragment) OS=Solenopsis invicta GN=SINV_07360 PE=4 SV=1
OMA14180	Amelprot:gi|328780989|ref|XP_001121493.2| PREDICTED: homeobox protein Nkx-2.5-like isoform X1 [Apis mellifera]	Cfelprot80:comp63305_c0_seq2_631_1523	Cfloprot:gi|752878507|ref|XP_011256740.1| PREDICTED: homeobox protein Nkx-2.2a-like isoform X1 [Camponotus floridanus]	Sinvprot:gi|751201735|ref|XP_011168832.1| PREDICTED: homeobox protein Nkx-2.5-like isoform X1 [Solenopsis invicta]	uniprot-apis3AUP000005203:tr|A0A087ZVA9|A0A087ZVA9_APIME Uncharacterized protein OS=Apis mellifera GN=LOC725671 PE=4 SV=1	uniprot-cflo3AUP000000311:tr|E2AEL9|E2AEL9_CAMFO Homeobox protein Nkx-2.2a OS=Camponotus floridanus GN=EAG_10678 PE=4 SV=1	uniprot-sinv3AUP000006539:tr|E9IB45|E9IB45_SOLIN Putative uncharacterized protein (Fragment) OS=Solenopsis invicta GN=SINV_01291 PE=4 SV=1
OMA12532	Amelprot:gi|66516052|ref|XP_623273.1| PREDICTED: serine/threonine-protein phosphatase PP1-beta catalytic subunit-like isoformX2 [Apis mellifera]	Cfelprot80:comp61642_c0_seq2_145_1159	Cfloprot:gi|752878496|ref|XP_011256735.1| PREDICTED: serine/threonine-protein phosphatase PP1-beta catalytic subunit isoform X1 [Camponotus floridanus]	Sinvprot:gi|751201746|ref|XP_011168874.1| PREDICTED: serine/threonine-protein phosphatase PP1-beta catalytic subunit isoform X1 [Solenopsis invicta]	uniprot-apis3AUP000005203:tr|A0A087ZV34|A0A087ZV34_APIME Serine/threonine-protein phosphatase OS=Apis mellifera GN=LOC409804 PE=3 SV=1	uniprot-cflo3AUP000000311:tr|E2AEL7|E2AEL7_CAMFO Serine/threonine-protein phosphatase OS=Camponotus floridanus GN=EAG_10676 PE=3 SV=1	uniprot-sinv3AUP000006539:tr|E9IB51|E9IB51_SOLIN Serine/threonine-protein phosphatase (Fragment) OS=Solenopsis invicta GN=SINV_11664 PE=3 SV=1
OMA13144	Amelprot:gi|571548654|ref|XP_006561709.1| PREDICTED: mortality factor 4-like protein 1-like isoform X1 [Apis mellifera]	Cfelprot80:comp59484_c0_seq1_356_1356	Cfloprot:gi|752878494|ref|XP_011256734.1| PREDICTED: mortality factor 4-like protein 1 [Camponotus floridanus]	Sinvprot:gi|751201751|ref|XP_011168895.1| PREDICTED: mortality factor 4-like protein 1 [Solenopsis invicta]	uniprot-apis3AUP000005203:tr|A0A087ZV33|A0A087ZV33_APIME Uncharacterized protein OS=Apis mellifera GN=LOC413181 PE=4 SV=1	uniprot-cflo3AUP000000311:tr|E2AEL6|E2AEL6_CAMFO Mortality factor 4-like protein 1 OS=Camponotus floridanus GN=EAG_10675 PE=4 SV=1	uniprot-sinv3AUP000006539:tr|E9IB52|E9IB52_SOLIN Putative uncharacterized protein (Fragment) OS=Solenopsis invicta GN=SINV_01922 PE=4 SV=1
OMA06105	Amelprot:gi|66518074|ref|XP_396986.2| PREDICTED: peptidylprolyl isomerase domain and WD repeat-containing protein 1 isoformX1 [Apis mellifera]	Cfelprot80:comp35550_c0_seq1_130_1944	Cfloprot:gi|752868839|ref|XP_011251507.1| PREDICTED: peptidylprolyl isomerase domain and WD repeat-containing protein 1 [Camponotus floridanus]	Sinvprot:gi|751201767|ref|XP_011168980.1| PREDICTED: peptidylprolyl isomerase domain and WD repeat-containing protein 1 [Solenopsis invicta]	uniprot-apis3AUP000005203:tr|A0A088AAN1|A0A088AAN1_APIME Uncharacterized protein OS=Apis mellifera GN=PPWD1 PE=4 SV=1	uniprot-cflo3AUP000000311:tr|E2A4M6|E2A4M6_CAMFO Peptidylprolyl isomerase domain and WD repeat-containing protein 1 OS=Camponotus floridanus GN=EAG_11618 PE=4 SV=1	uniprot-sinv3AUP000006539:tr|E9IB56|E9IB56_SOLIN Putative uncharacterized protein (Fragment) OS=Solenopsis invicta GN=SINV_07490 PE=4 SV=1
OMA00498	Amelprot:gi|328786255|ref|XP_395596.4| PREDICTED: serine/threonine-protein kinase Genghis Khan isoform X2 [Apis mellifera]	Cfelprot80:comp65528_c0_seq3_149_5145	Cfloprot:gi|752887552|ref|XP_011261654.1| PREDICTED: serine/threonine-protein kinase Genghis Khan isoform X1 [Camponotus floridanus]	Sinvprot:gi|751201791|ref|XP_011169089.1| PREDICTED: serine/threonine-protein kinase Genghis Khan [Solenopsis invicta]	uniprot-apis3AUP000005203:tr|A0A088ALM0|A0A088ALM0_APIME Uncharacterized protein OS=Apis mellifera PE=4 SV=1	uniprot-cflo3AUP000000311:tr|E2APC9|E2APC9_CAMFO Non-specific serine/threonine protein kinase OS=Camponotus floridanus GN=EAG_06932 PE=4 SV=1	uniprot-sinv3AUP000006539:tr|E9IB62|E9IB62_SOLIN Non-specific serine/threonine protein kinase (Fragment) OS=Solenopsis invicta GN=SINV_05404 PE=4 SV=1
OMA17485	Amelprot:gi|571532025|ref|XP_006570299.1| PREDICTED: 40S ribosomal protein S5 isoform X1 [Apis mellifera]	Cfelprot80:comp36726_c0_seq1_195_832	Cfloprot:gi|752896884|ref|XP_011266720.1| PREDICTED: 40S ribosomal protein S5 [Camponotus floridanus]	Sinvprot:gi|751201803|ref|XP_011169142.1| PREDICTED: 40S ribosomal protein S5 [Solenopsis invicta]	uniprot-apis3AUP000005203:tr|A0A088A389|A0A088A389_APIME Uncharacterized protein OS=Apis mellifera GN=RpS5a PE=3 SV=1	uniprot-cflo3AUP000000311:tr|E2AZD1|E2AZD1_CAMFO 40S ribosomal protein S5 OS=Camponotus floridanus GN=EAG_12729 PE=3 SV=1	uniprot-sinv3AUP000006539:tr|E9IB66|E9IB66_SOLIN Putative uncharacterized protein (Fragment) OS=Solenopsis invicta GN=SINV_07427 PE=3 SV=1
OMA21095	Amelprot:gi|48120572|ref|XP_396465.1| PREDICTED: NADH dehydrogenase [ubiquinone] 1 alpha subcomplex subunit 5 [Apis mellifera]	Cfelprot80:comp36949_c0_seq1_49_401	Cfloprot:gi|752896886|ref|XP_011266722.1| PREDICTED: NADH dehydrogenase [ubiquinone] 1 alpha subcomplex subunit 5 [Camponotus floridanus]	Sinvprot:gi|751201805|ref|XP_011169153.1| PREDICTED: NADH dehydrogenase [ubiquinone] 1 alpha subcomplex subunit 5 [Solenopsis invicta]	uniprot-apis3AUP000005203:tr|A0A088A390|A0A088A390_APIME Uncharacterized protein OS=Apis mellifera GN=Ndufa5 PE=4 SV=1	uniprot-cflo3AUP000000311:tr|E2AZD2|E2AZD2_CAMFO NADH dehydrogenase [ubiquinone] 1 alpha subcomplex subunit 5 OS=Camponotus floridanus GN=EAG_12730 PE=4 SV=1	uniprot-sinv3AUP000006539:tr|E9IB67|E9IB67_SOLIN Putative uncharacterized protein (Fragment) OS=Solenopsis invicta GN=SINV_00559 PE=4 SV=1
OMA09060	Amelprot:gi|571525431|ref|XP_006567305.1| PREDICTED: protein mothers against dpp [Apis mellifera]	Cfelprot80:comp65122_c0_seq1_4121_4194	Cfloprot:gi|752896916|ref|XP_011266739.1| PREDICTED: protein mothers against dpp [Camponotus floridanus]	Sinvprot:gi|751201821|ref|XP_011169230.1| PREDICTED: protein mothers against dpp [Solenopsis invicta]	uniprot-apis3AUP000005203:tr|A0A087ZZ35|A0A087ZZ35_APIME Mothers against decapentaplegic homolog OS=Apis mellifera GN=Mad PE=3 SV=1	uniprot-cflo3AUP000000311:tr|E2AZD5|E2AZD5_CAMFO Mothers against decapentaplegic homolog OS=Camponotus floridanus GN=EAG_12733 PE=3 SV=1	uniprot-sinv3AUP000006539:tr|E9IB72|E9IB72_SOLIN Mothers against decapentaplegic homolog (Fragment) OS=Solenopsis invicta GN=SINV_08921 PE=3 SV=1
OMA09104	Amelprot:gi|328791084|ref|XP_393224.2| PREDICTED: adenosine monophosphate-protein transferase FICD homolog isoform 1 [Apis mellifera]	Cfelprot80:comp68246_c0_seq1_172_1440	Cfloprot:gi|752896920|ref|XP_011266741.1| PREDICTED: adenosine monophosphate-protein transferase FICD homolog [Camponotus floridanus]	Sinvprot:gi|751201823|ref|XP_011169244.1| PREDICTED: adenosine monophosphate-protein transferase FICD homolog [Solenopsis invicta]	uniprot-apis3AUP000005203:tr|A0A088A303|A0A088A303_APIME Uncharacterized protein OS=Apis mellifera GN=LOC409726 PE=4 SV=1	uniprot-cflo3AUP000000311:tr|E2AZD6|E2AZD6_CAMFO FIC domain-containing protein OS=Camponotus floridanus GN=EAG_12734 PE=4 SV=1	uniprot-sinv3AUP000006539:tr|E9IB73|E9IB73_SOLIN Putative uncharacterized protein (Fragment) OS=Solenopsis invicta GN=SINV_80578 PE=4 SV=1
OMA08741	Amelprot:gi|571504026|ref|XP_006568701.1| PREDICTED: locomotion-related protein Hikaru genki isoform X3 [Apis mellifera]	Cfelprot80:comp63110_c0_seq1_536_1895	Cfloprot:gi|752896942|ref|XP_011266753.1| PREDICTED: locomotion-related protein Hikaru genki isoform X1 [Camponotus floridanus]	Sinvprot:gi|751201859|ref|XP_011169412.1| PREDICTED: locomotion-related protein Hikaru genki [Solenopsis invicta]	uniprot-apis3AUP000005203:tr|A0A088A3G8|A0A088A3G8_APIME Uncharacterized protein OS=Apis mellifera GN=hig PE=4 SV=1	uniprot-cflo3AUP000000311:tr|E2AZF4|E2AZF4_CAMFO Locomotion-related protein Hikaru genki OS=Camponotus floridanus GN=EAG_12752 PE=4 SV=1	uniprot-sinv3AUP000006539:tr|E9IB84|E9IB84_SOLIN Putative uncharacterized protein (Fragment) OS=Solenopsis invicta GN=SINV_03685 PE=4 SV=1
OMA10919	Amelprot:gi|571504039|ref|XP_006568702.1| PREDICTED: 39S ribosomal protein L38, mitochondrial isoform X1 [Apis mellifera]	Cfelprot80:comp63822_c0_seq2_204_1414	Cfloprot:gi|752896950|ref|XP_011266757.1| PREDICTED: 39S ribosomal protein L38, mitochondrial [Camponotus floridanus]	Sinvprot:gi|751201857|ref|XP_011169405.1| PREDICTED: 39S ribosomal protein L38, mitochondrial [Solenopsis invicta]	uniprot-apis3AUP000005203:tr|A0A088A3P3|A0A088A3P3_APIME Uncharacterized protein OS=Apis mellifera GN=mRpL38 PE=4 SV=1	uniprot-cflo3AUP000000311:tr|E2AZF6|E2AZF6_CAMFO 39S ribosomal protein L38, mitochondrial OS=Camponotus floridanus GN=EAG_12754 PE=4 SV=1	uniprot-sinv3AUP000006539:tr|E9IB86|E9IB86_SOLIN Putative uncharacterized protein (Fragment) OS=Solenopsis invicta GN=SINV_11250 PE=4 SV=1
OMA05190	Amelprot:gi|328789240|ref|XP_001121110.2| PREDICTED: protein scabrous [Apis mellifera]	Cfelprot80:comp63539_c0_seq2_798_2660	Cfloprot:gi|752896961|ref|XP_011266763.1| PREDICTED: protein scabrous-like [Camponotus floridanus]	Sinvprot:gi|751201861|ref|XP_011169432.1| PREDICTED: protein scabrous-like [Solenopsis invicta]	uniprot-apis3AUP000005203:tr|A0A088A3N9|A0A088A3N9_APIME Uncharacterized protein OS=Apis mellifera GN=sca PE=4 SV=1	uniprot-cflo3AUP000000311:tr|E2AZF8|E2AZF8_CAMFO Protein scabrous OS=Camponotus floridanus GN=EAG_12756 PE=4 SV=1	uniprot-sinv3AUP000006539:tr|E9IB88|E9IB88_SOLIN Putative uncharacterized protein (Fragment) OS=Solenopsis invicta GN=SINV_13143 PE=4 SV=1
OMA10421	Amelprot:gi|571531894|ref|XP_006570277.1| PREDICTED: broad-complex core protein isoforms 1/2/3/4/5 isoform X3 [Apis mellifera]	Cfelprot80:comp65931_c0_seq1_707_1499	Cfloprot:gi|752892221|ref|XP_011264185.1| PREDICTED: broad-complex core protein isoforms 1/2/3/4/5-like isoform X2 [Camponotus floridanus]	Sinvprot:gi|751201905|ref|XP_011169626.1| PREDICTED: broad-complex core protein isoforms 1/2/3/4/5-like isoform X2 [Solenopsis invicta]	uniprot-apis3AUP000005203:tr|A0A088A368|A0A088A368_APIME Uncharacterized protein OS=Apis mellifera GN=LOC411126 PE=4 SV=1	uniprot-cflo3AUP000000311:tr|E2AUH9|E2AUH9_CAMFO Broad-complex core protein isoform 6 OS=Camponotus floridanus GN=EAG_16177 PE=4 SV=1	uniprot-sinv3AUP000006539:tr|E9IBA5|E9IBA5_SOLIN Putative uncharacterized protein (Fragment) OS=Solenopsis invicta GN=SINV_08449 PE=4 SV=1
OMA04711	Amelprot:gi|571531910|ref|XP_394599.3| PREDICTED: conserved oligomeric Golgi complex subunit 4-like isoform X5 [Apis mellifera]	Cfelprot80:comp66287_c0_seq2_227_2370	Cfloprot:gi|752885444|ref|XP_011260507.1| PREDICTED: conserved oligomeric Golgi complex subunit 4 [Camponotus floridanus]	Sinvprot:gi|751202304|ref|XP_011171435.1| PREDICTED: conserved oligomeric Golgi complex subunit 4 [Solenopsis invicta]	uniprot-apis3AUP000005203:tr|A0A088A322|A0A088A322_APIME Uncharacterized protein OS=Apis mellifera GN=LOC411125 PE=4 SV=1	uniprot-cflo3AUP000000311:tr|E2ALU0|E2ALU0_CAMFO Conserved oligomeric Golgi complex subunit 4 OS=Camponotus floridanus GN=EAG_10604 PE=4 SV=1	uniprot-sinv3AUP000006539:tr|E9IBA8|E9IBA8_SOLIN Putative uncharacterized protein (Fragment) OS=Solenopsis invicta GN=SINV_07210 PE=4 SV=1
OMA02274	Amelprot:gi|571529116|ref|XP_006567714.1| PREDICTED: pre-mRNA-processing factor 39-like [Apis mellifera]	Cfelprot80:comp64787_c0_seq2_122_3183	Cfloprot:gi|752885446|ref|XP_011260509.1| PREDICTED: pre-mRNA-processing factor 39 [Camponotus floridanus]	Sinvprot:gi|751201918|ref|XP_011169702.1| PREDICTED: pre-mRNA-processing factor 39 [Solenopsis invicta]	uniprot-apis3AUP000005203:tr|A0A088A060|A0A088A060_APIME Uncharacterized protein OS=Apis mellifera PE=4 SV=1	uniprot-cflo3AUP000000311:tr|E2ALU2|E2ALU2_CAMFO Pre-mRNA-processing factor 39 OS=Camponotus floridanus GN=EAG_10606 PE=4 SV=1	uniprot-sinv3AUP000006539:tr|E9IBA9|E9IBA9_SOLIN Putative uncharacterized protein (Fragment) OS=Solenopsis invicta GN=SINV_09870 PE=4 SV=1
OMA16698	Amelprot:gi|571500401|ref|XP_006559947.1| PREDICTED: RRP15-like protein-like [Apis mellifera]	Cfelprot80:comp58856_c0_seq1_110_812	Cfloprot:gi|752885448|ref|XP_011260510.1| PREDICTED: RRP15-like protein [Camponotus floridanus]	Sinvprot:gi|751201924|ref|XP_011169727.1| PREDICTED: LOW QUALITY PROTEIN: RRP15-like protein [Solenopsis invicta]	uniprot-apis3AUP000005203:tr|A0A088AFX3|A0A088AFX3_APIME Uncharacterized protein OS=Apis mellifera GN=LOC724992 PE=4 SV=1	uniprot-cflo3AUP000000311:tr|E2ALU4|E2ALU4_CAMFO RRP15-like protein OS=Camponotus floridanus GN=EAG_10608 PE=4 SV=1	uniprot-sinv3AUP000006539:tr|E9IBB1|E9IBB1_SOLIN Putative uncharacterized protein (Fragment) OS=Solenopsis invicta GN=SINV_13102 PE=4 SV=1
OMA14254	Amelprot:gi|571502934|ref|XP_006565392.1| PREDICTED: dexamethasone-induced Ras-related protein 1-like, partial [Apis mellifera]	Cfelprot80:comp72151_c0_seq1_328_1364	Cfloprot:gi|752884451|ref|XP_011259966.1| PREDICTED: dexamethasone-induced Ras-related protein 1 [Camponotus floridanus]	Sinvprot:gi|751201950|ref|XP_011169839.1| PREDICTED: GTP-binding protein Rhes [Solenopsis invicta]	uniprot-apis3AUP000005203:tr|A0A088AC07|A0A088AC07_APIME Uncharacterized protein OS=Apis mellifera GN=LOC409966 PE=4 SV=1	uniprot-cflo3AUP000000311:tr|E2AKT6|E2AKT6_CAMFO GTP-binding protein Rhes OS=Camponotus floridanus GN=EAG_06004 PE=4 SV=1	uniprot-sinv3AUP000006539:tr|E9IBC3|E9IBC3_SOLIN Putative uncharacterized protein (Fragment) OS=Solenopsis invicta GN=SINV_13745 PE=4 SV=1
OMA10826	Amelprot:gi|571529384|ref|XP_006567768.1| PREDICTED: aprataxin and PNK-like factor-like isoform X2 [Apis mellifera]	Cfelprot80:comp58390_c0_seq4_378_1476	Cfloprot:gi|752894911|ref|XP_011265654.1| PREDICTED: aprataxin and PNK-like factor [Camponotus floridanus]	Sinvprot:gi|751201958|ref|XP_011169864.1| PREDICTED: aprataxin and PNK-like factor isoform X1 [Solenopsis invicta]	uniprot-apis3AUP000005203:tr|A0A087ZZZ2|A0A087ZZZ2_APIME Uncharacterized protein OS=Apis mellifera GN=LOC100578746 PE=4 SV=1	uniprot-cflo3AUP000000311:tr|E2AXA2|E2AXA2_CAMFO Aprataxin and PNK-like factor OS=Camponotus floridanus GN=EAG_01142 PE=4 SV=1	uniprot-sinv3AUP000006539:tr|E9IBC6|E9IBC6_SOLIN Putative uncharacterized protein (Fragment) OS=Solenopsis invicta GN=SINV_07193 PE=4 SV=1
OMA05350	Amelprot:gi|571529374|ref|XP_006567767.1| PREDICTED: WD repeat-containing protein 20-like isoform X1 [Apis mellifera]	Cfelprot80:comp70235_c0_seq1_451_2437	Cfloprot:gi|752894913|ref|XP_011265655.1| PREDICTED: WD repeat-containing protein 20 isoform X1 [Camponotus floridanus]	Sinvprot:gi|751201968|ref|XP_011169899.1| PREDICTED: WD repeat-containing protein 20 [Solenopsis invicta]	uniprot-apis3AUP000005203:tr|A0A087ZZZ0|A0A087ZZZ0_APIME Uncharacterized protein OS=Apis mellifera GN=LOC411604 PE=4 SV=1	uniprot-cflo3AUP000000311:tr|E2AXA3|E2AXA3_CAMFO WD repeat-containing protein 20 OS=Camponotus floridanus GN=EAG_01143 PE=4 SV=1	uniprot-sinv3AUP000006539:tr|E9IBC7|E9IBC7_SOLIN Putative uncharacterized protein (Fragment) OS=Solenopsis invicta GN=SINV_02052 PE=4 SV=1
OMA04106	Amelprot:gi|571529454|ref|XP_006567785.1| PREDICTED: digestive organ expansion factor homolog [Apis mellifera]	Cfelprot80:comp71472_c0_seq1_117_2404	Cfloprot:gi|752888533|ref|XP_011262186.1| PREDICTED: digestive organ expansion factor homolog [Camponotus floridanus]	Sinvprot:gi|751201984|ref|XP_011169954.1| PREDICTED: digestive organ expansion factor homolog [Solenopsis invicta]	uniprot-apis3AUP000005203:tr|A0A088A089|A0A088A089_APIME Uncharacterized protein OS=Apis mellifera GN=LOC411603 PE=4 SV=1	uniprot-cflo3AUP000000311:tr|E2AQF3|E2AQF3_CAMFO Digestive organ expansion factor-like protein OS=Camponotus floridanus GN=EAG_05183 PE=4 SV=1	uniprot-sinv3AUP000006539:tr|E9IBC8|E9IBC8_SOLIN Putative uncharacterized protein (Fragment) OS=Solenopsis invicta GN=SINV_02801 PE=4 SV=1
OMA17674	Amelprot:gi|110758628|ref|XP_392556.3| PREDICTED: transmembrane emp24 domain-containing protein bai [Apis mellifera]	Cfelprot80:comp36648_c0_seq1_266_790	Cfloprot:gi|752872007|ref|XP_011253226.1| PREDICTED: transmembrane emp24 domain-containing protein bai isoform X2 [Camponotus floridanus]	Sinvprot:gi|751202004|ref|XP_011170023.1| PREDICTED: transmembrane emp24 domain-containing protein bai isoform X2 [Solenopsis invicta]	uniprot-apis3AUP000005203:tr|A0A087ZNT8|A0A087ZNT8_APIME Uncharacterized protein OS=Apis mellifera GN=bai PE=3 SV=1	uniprot-cflo3AUP000000311:tr|E2A849|E2A849_CAMFO Transmembrane emp24 domain-containing protein 10 OS=Camponotus floridanus GN=EAG_01669 PE=3 SV=1	uniprot-sinv3AUP000006539:tr|E9IBD7|E9IBD7_SOLIN Putative uncharacterized protein (Fragment) OS=Solenopsis invicta GN=SINV_09815 PE=3 SV=1
OMA17309	Amelprot:gi|66530023|ref|XP_393046.2| PREDICTED: mob as tumor suppressor isoform X2 [Apis mellifera]	Cfelprot80:comp55636_c0_seq1_385_983	Cfloprot:gi|752881584|ref|XP_011258404.1| PREDICTED: MOB kinase activator-like 1 [Camponotus floridanus]	Sinvprot:gi|751202044|ref|XP_011170212.1| PREDICTED: MOB kinase activator-like 1 isoform X1 [Solenopsis invicta]	uniprot-apis3AUP000005203:tr|A0A088ABP9|A0A088ABP9_APIME Uncharacterized protein OS=Apis mellifera GN=mats PE=4 SV=1	uniprot-cflo3AUP000000311:tr|E2AI09|E2AI09_CAMFO Mps one binder kinase activator-like 1A OS=Camponotus floridanus GN=EAG_02422 PE=4 SV=1	uniprot-sinv3AUP000006539:tr|E9IBE6|E9IBE6_SOLIN Putative uncharacterized protein (Fragment) OS=Solenopsis invicta GN=SINV_00201 PE=4 SV=1
OMA16877	Amelprot:gi|328788442|ref|XP_624826.3| PREDICTED: mediator of RNA polymerase II transcription subunit 6 [Apis mellifera]	Cfelprot80:comp68112_c0_seq1_188_871	Cfloprot:gi|752884606|ref|XP_011260051.1| PREDICTED: mediator of RNA polymerase II transcription subunit 6 [Camponotus floridanus]	Sinvprot:gi|751202066|ref|XP_011170285.1| PREDICTED: mediator of RNA polymerase II transcription subunit 6 [Solenopsis invicta]	uniprot-apis3AUP000005203:tr|A0A088A0I1|A0A088A0I1_APIME Mediator of RNA polymerase II transcription subunit 6 OS=Apis mellifera GN=MED6 PE=3 SV=1	uniprot-cflo3AUP000000311:tr|E2AKZ6|E2AKZ6_CAMFO Mediator of RNA polymerase II transcription subunit 6 OS=Camponotus floridanus GN=EAG_09216 PE=3 SV=1	uniprot-sinv3AUP000006539:tr|E9IBF1|E9IBF1_SOLIN Putative uncharacterized protein (Fragment) OS=Solenopsis invicta GN=SINV_10332 PE=4 SV=1
OMA02754	Amelprot:gi|110756745|ref|XP_395525.3| PREDICTED: F-box only protein 11-like [Apis mellifera]	Cfelprot80:comp51643_c0_seq1_1_2737	Cfloprot:gi|752884636|ref|XP_011260067.1| PREDICTED: F-box only protein 11 [Camponotus floridanus]	Sinvprot:gi|751202074|ref|XP_011170321.1| PREDICTED: F-box only protein 11 [Solenopsis invicta]	uniprot-apis3AUP000005203:tr|A0A087ZZQ0|A0A087ZZQ0_APIME Uncharacterized protein OS=Apis mellifera GN=LOC412059 PE=4 SV=1	uniprot-cflo3AUP000000311:tr|E2AKZ9|E2AKZ9_CAMFO F-box only protein 11 OS=Camponotus floridanus GN=EAG_09219 PE=4 SV=1	uniprot-sinv3AUP000006539:tr|E9IBF2|E9IBF2_SOLIN Putative uncharacterized protein (Fragment) OS=Solenopsis invicta GN=SINV_00611 PE=4 SV=1
OMA14040	Amelprot:gi|328788458|ref|XP_392849.4| PREDICTED: CAAX prenyl protease 2-like isoform X2 [Apis mellifera]	Cfelprot80:comp69514_c0_seq1_111_988	Cfloprot:gi|752884632|ref|XP_011260065.1| PREDICTED: CAAX prenyl protease 2 isoform X1 [Camponotus floridanus]	Sinvprot:gi|751202072|ref|XP_011170310.1| PREDICTED: CAAX prenyl protease 2 [Solenopsis invicta]	uniprot-apis3AUP000005203:tr|A0A088A0I3|A0A088A0I3_APIME Uncharacterized protein OS=Apis mellifera GN=LOC409333 PE=4 SV=1	uniprot-cflo3AUP000000311:tr|E2AL00|E2AL00_CAMFO CAAX prenyl protease 2 OS=Camponotus floridanus GN=EAG_09220 PE=4 SV=1	uniprot-sinv3AUP000006539:tr|E9IBF3|E9IBF3_SOLIN Putative uncharacterized protein (Fragment) OS=Solenopsis invicta GN=SINV_11598 PE=4 SV=1
OMA04978	Amelprot:gi|571530634|ref|XP_006567975.1| PREDICTED: BTB/POZ domain-containing protein KCTD3-like isoform X3 [Apis mellifera]	Cfelprot80:comp54684_c0_seq1_153_2202	Cfloprot:gi|752884630|ref|XP_011260064.1| PREDICTED: BTB/POZ domain-containing protein KCTD3 isoform X4 [Camponotus floridanus]	Sinvprot:gi|751202070|ref|XP_011170302.1| PREDICTED: BTB/POZ domain-containing protein KCTD3 isoform X2 [Solenopsis invicta]	uniprot-apis3AUP000005203:tr|A0A087ZZP9|A0A087ZZP9_APIME Uncharacterized protein OS=Apis mellifera GN=LOC411419 PE=4 SV=1	uniprot-cflo3AUP000000311:tr|E2AL01|E2AL01_CAMFO BTB/POZ domain-containing protein KCTD3 OS=Camponotus floridanus GN=EAG_09221 PE=4 SV=1	uniprot-sinv3AUP000006539:tr|E9IBF4|E9IBF4_SOLIN Putative uncharacterized protein (Fragment) OS=Solenopsis invicta GN=SINV_02116 PE=4 SV=1
OMA10183	Amelprot:gi|328784931|ref|XP_001121873.2| PREDICTED: N-acetylated-alpha-linked acidic dipeptidase-like protein-like [Apis mellifera]	Cfelprot80:comp63402_c0_seq1_859_1667	Cfloprot:gi|752881684|ref|XP_011258459.1| PREDICTED: uncharacterized protein LOC105252657 [Camponotus floridanus]	Sinvprot:gi|751202087|ref|XP_011170385.1| PREDICTED: N-acetylated-alpha-linked acidic dipeptidase-like protein [Solenopsis invicta]	uniprot-apis3AUP000005203:tr|A0A088AB34|A0A088AB34_APIME Uncharacterized protein OS=Apis mellifera GN=LOC726107 PE=4 SV=1	uniprot-cflo3AUP000000311:tr|E2AI35|E2AI35_CAMFO Putative uncharacterized protein OS=Camponotus floridanus GN=EAG_02448 PE=4 SV=1	uniprot-sinv3AUP000006539:tr|E9IBG3|E9IBG3_SOLIN Putative uncharacterized protein (Fragment) OS=Solenopsis invicta GN=SINV_02507 PE=4 SV=1
OMA06163	Amelprot:gi|571528656|ref|XP_006564849.1| PREDICTED: L-asparaginase-like isoform X1 [Apis mellifera]	Cfelprot80:comp59984_c0_seq3_97_1896	Cfloprot:gi|752881682|ref|XP_011258458.1| PREDICTED: L-asparaginase [Camponotus floridanus]	Sinvprot:gi|751202097|ref|XP_011170446.1| PREDICTED: L-asparaginase-like [Solenopsis invicta]	uniprot-apis3AUP000005203:tr|A0A088AB36|A0A088AB36_APIME Uncharacterized protein OS=Apis mellifera GN=LOC551548 PE=3 SV=1	uniprot-cflo3AUP000000311:tr|E2AI33|E2AI33_CAMFO L-asparaginase OS=Camponotus floridanus GN=EAG_02446 PE=3 SV=1	uniprot-sinv3AUP000006539:tr|E9IBG5|E9IBG5_SOLIN Putative uncharacterized protein (Fragment) OS=Solenopsis invicta GN=SINV_02665 PE=3 SV=1
OMA16905	Amelprot:gi|328788446|ref|XP_003251133.1| PREDICTED: uncharacterized protein LOC725478 isoform 2 [Apis mellifera]	Cfelprot80:comp60793_c0_seq1_683_1154	Cfloprot:gi|752881668|ref|XP_011258451.1| PREDICTED: N-acetyltransferase 6 [Camponotus floridanus]	Sinvprot:gi|751202109|ref|XP_011170489.1| PREDICTED: N-acetyltransferase 6 isoform X1 [Solenopsis invicta]	uniprot-apis3AUP000005203:tr|A0A087ZZQ2|A0A087ZZQ2_APIME Uncharacterized protein OS=Apis mellifera GN=LOC725478 PE=4 SV=1	uniprot-cflo3AUP000000311:tr|E2AI28|E2AI28_CAMFO N-acetyltransferase 6 OS=Camponotus floridanus GN=EAG_02441 PE=4 SV=1	uniprot-sinv3AUP000006539:tr|E9IBG9|E9IBG9_SOLIN Putative uncharacterized protein (Fragment) OS=Solenopsis invicta GN=SINV_11559 PE=4 SV=1
OMA18037	Amelprot:gi|66508961|ref|XP_395902.2| PREDICTED: flavin reductase (NADPH)-like [Apis mellifera]	Cfelprot80:comp58238_c0_seq2_234_819	Cfloprot:gi|752881664|ref|XP_011258448.1| PREDICTED: flavin reductase (NADPH) [Camponotus floridanus]	Sinvprot:gi|751202125|ref|XP_011170556.1| PREDICTED: flavin reductase (NADPH)-like [Solenopsis invicta]	uniprot-apis3AUP000005203:tr|A0A088A0I0|A0A088A0I0_APIME Uncharacterized protein OS=Apis mellifera GN=LOC412445 PE=4 SV=1	uniprot-cflo3AUP000000311:tr|E2AI27|E2AI27_CAMFO Flavin reductase OS=Camponotus floridanus GN=EAG_02440 PE=4 SV=1	uniprot-sinv3AUP000006539:tr|E9IBH1|E9IBH1_SOLIN Putative uncharacterized protein (Fragment) OS=Solenopsis invicta GN=SINV_00943 PE=4 SV=1
OMA04068	Amelprot:gi|571529075|ref|XP_006567709.1| PREDICTED: ankyrin repeat and zinc finger domain-containing protein 1-like isoform X1 [Apis mellifera]	Cfelprot80:comp59133_c0_seq1_237_2536	Cfloprot:gi|752887528|ref|XP_011261640.1| PREDICTED: ankyrin repeat and zinc finger domain-containing protein 1-like isoform X1 [Camponotus floridanus]	Sinvprot:gi|751202153|ref|XP_011170659.1| PREDICTED: ankyrin repeat and zinc finger domain-containing protein 1-like isoform X1 [Solenopsis invicta]	uniprot-apis3AUP000005203:tr|A0A088A054|A0A088A054_APIME Uncharacterized protein OS=Apis mellifera GN=LOC409046 PE=4 SV=1	uniprot-cflo3AUP000000311:tr|E2APC5|E2APC5_CAMFO Ankyrin repeat and zinc finger domain-containing protein 1 OS=Camponotus floridanus GN=EAG_08850 PE=4 SV=1	uniprot-sinv3AUP000006539:tr|E9IBH8|E9IBH8_SOLIN Putative uncharacterized protein (Fragment) OS=Solenopsis invicta GN=SINV_80223 PE=4 SV=1
OMA02369	Amelprot:gi|66509418|ref|XP_624678.1| PREDICTED: myosin-IA [Apis mellifera]	Cfelprot80:comp61156_c0_seq1_158_3154	Cfloprot:gi|752887521|ref|XP_011261637.1| PREDICTED: myosin-IA [Camponotus floridanus]	Sinvprot:gi|751202157|ref|XP_011170672.1| PREDICTED: myosin-IA [Solenopsis invicta]	uniprot-apis3AUP000005203:tr|A0A088A019|A0A088A019_APIME Uncharacterized protein OS=Apis mellifera GN=Myo1A PE=4 SV=1	uniprot-cflo3AUP000000311:tr|E2APC4|E2APC4_CAMFO Myosin-IA OS=Camponotus floridanus GN=EAG_08849 PE=4 SV=1	uniprot-sinv3AUP000006539:tr|E9IBH9|E9IBH9_SOLIN Putative uncharacterized protein (Fragment) OS=Solenopsis invicta GN=SINV_13577 PE=4 SV=1
OMA03975	Amelprot:gi|328788537|ref|XP_624702.2| PREDICTED: ubiquitin carboxyl-terminal hydrolase 5-like [Apis mellifera]	Cfelprot80:comp45708_c0_seq1_251_2527	Cfloprot:gi|752887519|ref|XP_011261636.1| PREDICTED: ubiquitin carboxyl-terminal hydrolase 5 [Camponotus floridanus]	Sinvprot:gi|751202159|ref|XP_011170682.1| PREDICTED: ubiquitin carboxyl-terminal hydrolase 5 [Solenopsis invicta]	uniprot-apis3AUP000005203:tr|A0A088A052|A0A088A052_APIME Ubiquitin carboxyl-terminal hydrolase OS=Apis mellifera GN=LOC552324 PE=3 SV=1	uniprot-cflo3AUP000000311:tr|E2APC3|E2APC3_CAMFO Ubiquitin carboxyl-terminal hydrolase OS=Camponotus floridanus GN=EAG_08848 PE=3 SV=1	uniprot-sinv3AUP000006539:tr|E9IBI0|E9IBI0_SOLIN Ubiquitin carboxyl-terminal hydrolase (Fragment) OS=Solenopsis invicta GN=SINV_08392 PE=3 SV=1
OMA04606	Amelprot:gi|328785852|ref|XP_396937.4| PREDICTED: serine/threonine-protein kinase TBK1 [Apis mellifera]	Cfelprot80:comp34431_c0_seq1_549_2755	Cfloprot:gi|752875806|ref|XP_011255271.1| PREDICTED: inhibitor of nuclear factor kappa-B kinase subunit epsilon [Camponotus floridanus]	Sinvprot:gi|751202163|ref|XP_011170700.1| PREDICTED: serine/threonine-protein kinase TBK1 [Solenopsis invicta]	uniprot-apis3AUP000005203:tr|A0A087ZUD8|A0A087ZUD8_APIME Uncharacterized protein OS=Apis mellifera GN=ik2 PE=4 SV=1	uniprot-cflo3AUP000000311:tr|E2AC16|E2AC16_CAMFO Serine/threonine-protein kinase TBK1 OS=Camponotus floridanus GN=EAG_13484 PE=4 SV=1	uniprot-sinv3AUP000006539:tr|E9IBI1|E9IBI1_SOLIN Putative uncharacterized protein (Fragment) OS=Solenopsis invicta GN=SINV_12392 PE=4 SV=1
OMA04105	Amelprot:gi|571574434|ref|XP_006563442.1| PREDICTED: nucleolar complex protein 3 homolog [Apis mellifera]	Cfelprot80:comp40781_c0_seq1_175_2497	Cfloprot:gi|752875812|ref|XP_011255274.1| PREDICTED: nucleolar complex protein 3 homolog [Camponotus floridanus]	Sinvprot:gi|751202165|ref|XP_011170713.1| PREDICTED: nucleolar complex protein 3 homolog [Solenopsis invicta]	uniprot-apis3AUP000005203:tr|A0A088AF85|A0A088AF85_APIME Uncharacterized protein OS=Apis mellifera GN=LOC725755 PE=4 SV=1	uniprot-cflo3AUP000000311:tr|E2AC18|E2AC18_CAMFO Nucleolar complex protein 3-like protein OS=Camponotus floridanus GN=EAG_13486 PE=4 SV=1	uniprot-sinv3AUP000006539:tr|E9IBI2|E9IBI2_SOLIN Putative uncharacterized protein (Fragment) OS=Solenopsis invicta GN=SINV_13758 PE=4 SV=1
OMA16329	Amelprot:gi|571531985|ref|XP_006570292.1| PREDICTED: proteasome subunit alpha type-7-1-like [Apis mellifera]	Cfelprot80:comp36395_c0_seq1_211_807	Cfloprot:gi|752875820|ref|XP_011255279.1| PREDICTED: proteasome subunit alpha type-7-1 [Camponotus floridanus]	Sinvprot:gi|751202169|ref|XP_011170739.1| PREDICTED: proteasome subunit alpha type-7-1-like [Solenopsis invicta]	uniprot-apis3AUP000005203:tr|A0A088A379|A0A088A379_APIME Proteasome subunit alpha type OS=Apis mellifera GN=LOC410095 PE=3 SV=1	uniprot-cflo3AUP000000311:tr|E2AC20|E2AC20_CAMFO Proteasome subunit alpha type OS=Camponotus floridanus GN=EAG_13488 PE=3 SV=1	uniprot-sinv3AUP000006539:tr|E9IBI4|E9IBI4_SOLIN Proteasome subunit alpha type (Fragment) OS=Solenopsis invicta GN=SINV_09089 PE=3 SV=1
OMA07134	Amelprot:gi|571531975|ref|XP_006570291.1| PREDICTED: gamma-glutamyltranspeptidase 1-like isoform X2 [Apis mellifera]	Cfelprot80:comp45114_c0_seq1_37_1731	Cfloprot:gi|752875818|ref|XP_011255278.1| PREDICTED: gamma-glutamyltranspeptidase 1-like [Camponotus floridanus]	Sinvprot:gi|751202171|ref|XP_011170750.1| PREDICTED: gamma-glutamyltranspeptidase 1-like [Solenopsis invicta]	uniprot-apis3AUP000005203:tr|A0A088A315|A0A088A315_APIME Uncharacterized protein OS=Apis mellifera GN=LOC410096 PE=4 SV=1	uniprot-cflo3AUP000000311:tr|E2AC21|E2AC21_CAMFO Gamma-glutamyltranspeptidase 1 (Fragment) OS=Camponotus floridanus GN=EAG_13489 PE=4 SV=1	uniprot-sinv3AUP000006539:tr|E9IBI5|E9IBI5_SOLIN Putative uncharacterized protein (Fragment) OS=Solenopsis invicta GN=SINV_04212 PE=4 SV=1
OMA19814	Amelprot:gi|110756965|ref|XP_001120140.1| PREDICTED: protein NPC2 homolog isoform X1 [Apis mellifera]	Cfelprot80:comp46617_c0_seq1_133_596	Cfloprot:gi|752875816|ref|XP_011255277.1| PREDICTED: protein NPC2 homolog [Camponotus floridanus]	Sinvprot:gi|751202173|ref|XP_011170763.1| PREDICTED: ecdysteroid-regulated 16 kDa protein [Solenopsis invicta]	uniprot-apis3AUP000005203:tr|A0A088A045|A0A088A045_APIME Uncharacterized protein OS=Apis mellifera GN=LOC725038 PE=4 SV=1	uniprot-cflo3AUP000000311:tr|E2AC22|E2AC22_CAMFO Ecdysteroid-regulated 16 kDa protein OS=Camponotus floridanus GN=EAG_13490 PE=4 SV=1	uniprot-sinv3AUP000006539:tr|E9IBI6|E9IBI6_SOLIN Putative uncharacterized protein (Fragment) OS=Solenopsis invicta GN=SINV_01668 PE=4 SV=1
OMA04121	Amelprot:gi|66509442|ref|XP_395694.2| PREDICTED: dipeptidyl peptidase 3-like isoform 1 [Apis mellifera]	Cfelprot80:comp65925_c0_seq1_674_2947	Cfloprot:gi|752898634|ref|XP_011267678.1| PREDICTED: dipeptidyl peptidase 3 isoform X1 [Camponotus floridanus]	Sinvprot:gi|751202189|ref|XP_011170858.1| PREDICTED: dipeptidyl peptidase 3 isoform X1 [Solenopsis invicta]	uniprot-apis3AUP000005203:tr|A0A088A023|A0A088A023_APIME Uncharacterized protein OS=Apis mellifera GN=LOC412232 PE=4 SV=1	uniprot-cflo3AUP000000311:tr|E2B1G2|E2B1G2_CAMFO Dipeptidyl-peptidase 3 OS=Camponotus floridanus GN=EAG_07699 PE=4 SV=1	uniprot-sinv3AUP000006539:tr|E9IBJ6|E9IBJ6_SOLIN Putative uncharacterized protein (Fragment) OS=Solenopsis invicta GN=SINV_01147 PE=4 SV=1
OMA12687	Amelprot:gi|571528677|ref|XP_006564855.1| PREDICTED: protein FAM50 homolog [Apis mellifera]	Cfelprot80:comp66535_c1_seq5_1915_2413	Cfloprot:gi|752897358|ref|XP_011266981.1| PREDICTED: protein FAM50 homolog [Camponotus floridanus]	Sinvprot:gi|751202195|ref|XP_011170876.1| PREDICTED: protein FAM50 homolog [Solenopsis invicta]	uniprot-apis3AUP000005203:tr|A0A088AB94|A0A088AB94_APIME Uncharacterized protein OS=Apis mellifera GN=LOC551692 PE=4 SV=1	uniprot-cflo3AUP000000311:tr|E2AZW2|E2AZW2_CAMFO Protein FAM50-like protein OS=Camponotus floridanus GN=EAG_14341 PE=4 SV=1	uniprot-sinv3AUP000006539:tr|E9IBJ7|E9IBJ7_SOLIN Putative uncharacterized protein (Fragment) OS=Solenopsis invicta GN=SINV_02871 PE=4 SV=1
OMA14836	Amelprot:gi|571528702|ref|XP_006564861.1| PREDICTED: uncharacterized protein C15orf41 homolog isoform X2 [Apis mellifera]	Cfelprot80:comp66535_c1_seq3_181_1013	Cfloprot:gi|752897362|ref|XP_011266983.1| PREDICTED: uncharacterized protein C15orf41 homolog [Camponotus floridanus]	Sinvprot:gi|751202197|ref|XP_011170885.1| PREDICTED: uncharacterized protein C15orf41 homolog [Solenopsis invicta]	uniprot-apis3AUP000005203:tr|A0A088AB30|A0A088AB30_APIME Uncharacterized protein OS=Apis mellifera GN=LOC724306 PE=4 SV=1	uniprot-cflo3AUP000000311:tr|E2AZW3|E2AZW3_CAMFO Uncharacterized protein C15orf41-like protein OS=Camponotus floridanus GN=EAG_14342 PE=4 SV=1	uniprot-sinv3AUP000006539:tr|E9IBJ8|E9IBJ8_SOLIN Putative uncharacterized protein (Fragment) OS=Solenopsis invicta GN=SINV_12077 PE=4 SV=1
OMA12214	Amelprot:gi|571528623|ref|XP_006564841.1| PREDICTED: G protein pathway suppressor 2-like isoform X3 [Apis mellifera]	Cfelprot80:comp65175_c0_seq3_330_1374	Cfloprot:gi|752897364|ref|XP_011266984.1| PREDICTED: protein enabled homolog [Camponotus floridanus]	Sinvprot:gi|751202199|ref|XP_011170895.1| PREDICTED: G protein pathway suppressor 2 [Solenopsis invicta]	uniprot-apis3AUP000005203:tr|A0A088AB88|A0A088AB88_APIME Uncharacterized protein OS=Apis mellifera GN=LOC551526 PE=4 SV=1	uniprot-cflo3AUP000000311:tr|E2AZW4|E2AZW4_CAMFO G protein pathway suppressor 2 OS=Camponotus floridanus GN=EAG_14343 PE=4 SV=1	uniprot-sinv3AUP000006539:tr|E9IBJ9|E9IBJ9_SOLIN Putative uncharacterized protein (Fragment) OS=Solenopsis invicta GN=SINV_07389 PE=4 SV=1
OMA01006	Amelprot:gi|571528604|ref|XP_006564837.1| PREDICTED: probable ATP-dependent RNA helicase spindle-E isoform X3 [Apis mellifera]	Cfelprot80:comp65497_c0_seq2_74_3671	Cfloprot:gi|752897366|ref|XP_011266985.1| PREDICTED: probable ATP-dependent RNA helicase spindle-E [Camponotus floridanus]	Sinvprot:gi|751202201|ref|XP_011170905.1| PREDICTED: probable ATP-dependent RNA helicase spindle-E [Solenopsis invicta]	uniprot-apis3AUP000005203:tr|A0A088AB38|A0A088AB38_APIME Uncharacterized protein OS=Apis mellifera GN=spn-E PE=4 SV=1	uniprot-cflo3AUP000000311:tr|E2AZW5|E2AZW5_CAMFO Putative ATP-dependent RNA helicase TDRD9 OS=Camponotus floridanus GN=EAG_14344 PE=4 SV=1	uniprot-sinv3AUP000006539:tr|E9IBK0|E9IBK0_SOLIN Putative uncharacterized protein (Fragment) OS=Solenopsis invicta GN=SINV_15467 PE=4 SV=1
OMA06961	Amelprot:gi|571499228|ref|XP_006557413.1| PREDICTED: poly(A)-specific ribonuclease PARN-like isoform X1 [Apis mellifera]	Cfelprot80:comp46124_c0_seq1_408_2037	Cfloprot:gi|752897386|ref|XP_011266996.1| PREDICTED: poly(A)-specific ribonuclease PARN-like [Camponotus floridanus]	Sinvprot:gi|751202213|ref|XP_011170978.1| PREDICTED: poly(A)-specific ribonuclease PARN-like isoform X1 [Solenopsis invicta]	uniprot-apis3AUP000005203:tr|A0A087ZTK8|A0A087ZTK8_APIME Uncharacterized protein OS=Apis mellifera GN=LOC102653701 PE=4 SV=1	uniprot-cflo3AUP000000311:tr|E2AZW9|E2AZW9_CAMFO Poly(A)-specific ribonuclease PARN OS=Camponotus floridanus GN=EAG_14348 PE=4 SV=1	uniprot-sinv3AUP000006539:tr|E9IBK7|E9IBK7_SOLIN Putative uncharacterized protein (Fragment) OS=Solenopsis invicta GN=SINV_07959 PE=4 SV=1
OMA06329	Amelprot:gi|571528695|ref|XP_006564859.1| PREDICTED: probable serine/threonine-protein kinase DDB_G0283337-like isoform X1 [Apis mellifera]	Cfelprot80:comp54025_c0_seq3_448_2162	Cfloprot:gi|752897407|ref|XP_011267007.1| PREDICTED: putative uncharacterized protein DDB_G0286901 isoform X1 [Camponotus floridanus]	Sinvprot:gi|751202217|ref|XP_011170999.1| PREDICTED: uncharacterized protein LOC105203791 isoform X1 [Solenopsis invicta]	uniprot-apis3AUP000005203:tr|A0A088AB95|A0A088AB95_APIME Uncharacterized protein OS=Apis mellifera GN=LOC724349 PE=4 SV=1	uniprot-cflo3AUP000000311:tr|E2AZX0|E2AZX0_CAMFO Putative uncharacterized protein OS=Camponotus floridanus GN=EAG_14349 PE=4 SV=1	uniprot-sinv3AUP000006539:tr|E9IBK8|E9IBK8_SOLIN Putative uncharacterized protein (Fragment) OS=Solenopsis invicta GN=SINV_09333 PE=4 SV=1
OMA05267	Amelprot:gi|66508837|ref|XP_392366.2| PREDICTED: neuroendocrine convertase 2 isoform 1 [Apis mellifera]	Cfelprot80:comp60885_c0_seq1_663_2528	Cfloprot:gi|752897405|ref|XP_011267006.1| PREDICTED: neuroendocrine convertase 2 [Camponotus floridanus]	Sinvprot:gi|751202221|ref|XP_011171019.1| PREDICTED: neuroendocrine convertase 2, partial [Solenopsis invicta]	uniprot-apis3AUP000005203:tr|A0A088AB96|A0A088AB96_APIME Uncharacterized protein OS=Apis mellifera PE=3 SV=1	uniprot-cflo3AUP000000311:tr|E2AZX1|E2AZX1_CAMFO Neuroendocrine convertase 2 OS=Camponotus floridanus GN=EAG_14350 PE=3 SV=1	uniprot-sinv3AUP000006539:tr|E9IBK9|E9IBK9_SOLIN Putative uncharacterized protein (Fragment) OS=Solenopsis invicta GN=SINV_80111 PE=3 SV=1
OMA04273	Amelprot:gi|328784915|ref|XP_001120289.2| PREDICTED: endothelin-converting enzyme-like 1-like isoform X1 [Apis mellifera]	Cfelprot80:comp64944_c0_seq1_101_2638	Cfloprot:gi|752897403|ref|XP_011267005.1| PREDICTED: neprilysin-1 [Camponotus floridanus]	Sinvprot:gi|751202223|ref|XP_011171031.1| PREDICTED: neprilysin [Solenopsis invicta]	uniprot-apis3AUP000005203:tr|A0A088AB97|A0A088AB97_APIME Uncharacterized protein OS=Apis mellifera GN=LOC724433 PE=4 SV=1	uniprot-cflo3AUP000000311:tr|E2AZX2|E2AZX2_CAMFO Endothelin-converting enzyme 1 OS=Camponotus floridanus GN=EAG_14351 PE=4 SV=1	uniprot-sinv3AUP000006539:tr|E9IBL1|E9IBL1_SOLIN Putative uncharacterized protein (Fragment) OS=Solenopsis invicta GN=SINV_07544 PE=4 SV=1
OMA16503	Amelprot:gi|571577935|ref|XP_006572224.1| PREDICTED: glutathione S-transferase omega-1 [Apis mellifera]	Cfelprot80:comp65756_c1_seq5_131_761	Cfloprot:gi|752897388|ref|XP_011266997.1| PREDICTED: pyrimidodiazepine synthase-like isoform X1 [Camponotus floridanus]	Sinvprot:gi|751202225|ref|XP_011171042.1| PREDICTED: pyrimidodiazepine synthase-like [Solenopsis invicta]	uniprot-apis3AUP000005203:tr|A0A088AI98|A0A088AI98_APIME Uncharacterized protein OS=Apis mellifera GN=GstO2 PE=4 SV=1	uniprot-cflo3AUP000000311:tr|E2AZX3|E2AZX3_CAMFO Glutathione transferase omega-1 OS=Camponotus floridanus GN=EAG_14352 PE=4 SV=1	uniprot-sinv3AUP000006539:tr|E9IBL2|E9IBL2_SOLIN Putative uncharacterized protein (Fragment) OS=Solenopsis invicta GN=SINV_07189 PE=3 SV=1
OMA01119	Amelprot:gi|66561865|ref|XP_395793.2| PREDICTED: mediator of RNA polymerase II transcription subunit 23 isoformX1 [Apis mellifera]	Cfelprot80:comp64271_c0_seq1_57_4041	Cfloprot:gi|752887588|ref|XP_011261672.1| PREDICTED: mediator of RNA polymerase II transcription subunit 23 isoform X1 [Camponotus floridanus]	Sinvprot:gi|751202227|ref|XP_011171054.1| PREDICTED: mediator of RNA polymerase II transcription subunit 23 [Solenopsis invicta]	uniprot-apis3AUP000005203:tr|A0A088AIA1|A0A088AIA1_APIME Uncharacterized protein OS=Apis mellifera GN=MED23 PE=4 SV=1	uniprot-cflo3AUP000000311:tr|E2APD6|E2APD6_CAMFO Mediator of RNA polymerase II transcription subunit 23 OS=Camponotus floridanus GN=EAG_06939 PE=4 SV=1	uniprot-sinv3AUP000006539:tr|E9IBL3|E9IBL3_SOLIN Putative uncharacterized protein (Fragment) OS=Solenopsis invicta GN=SINV_04347 PE=4 SV=1
OMA22054	Amelprot:gi|66549336|ref|XP_623227.1| PREDICTED: small ubiquitin-related modifier 3 isoform 1 [Apis mellifera]	Cfelprot80:comp67194_c0_seq1_307_552	Cfloprot:gi|752875772|ref|XP_011255252.1| PREDICTED: small ubiquitin-related modifier 3 [Camponotus floridanus]	Sinvprot:gi|751202229|ref|XP_011171067.1| PREDICTED: small ubiquitin-related modifier 3-like [Solenopsis invicta]	uniprot-apis3AUP000005203:tr|H9KID5|H9KID5_APIME Small ubiquitin-related modifier OS=Apis mellifera GN=smt3 PE=3 SV=1	uniprot-cflo3AUP000000311:tr|E2AC05|E2AC05_CAMFO Small ubiquitin-related modifier OS=Camponotus floridanus GN=EAG_13473 PE=3 SV=1	uniprot-sinv3AUP000006539:tr|E9IBL4|E9IBL4_SOLIN Small ubiquitin-related modifier (Fragment) OS=Solenopsis invicta GN=SINV_07820 PE=3 SV=1
OMA00374	Amelprot:gi|571577749|ref|XP_623281.3| PREDICTED: DNA-directed RNA polymerase II subunit RPB1 isoform 2 [Apis mellifera]	Cfelprot80:comp63650_c2_seq1_35_4960	Cfloprot:gi|752875788|ref|XP_011255261.1| PREDICTED: DNA-directed RNA polymerase II subunit RPB1 [Camponotus floridanus]	Sinvprot:gi|751202241|ref|XP_011171115.1| PREDICTED: DNA-directed RNA polymerase II subunit RPB1 [Solenopsis invicta]	uniprot-apis3AUP000005203:tr|A0A088AA86|A0A088AA86_APIME DNA-directed RNA polymerase OS=Apis mellifera GN=RpII215 PE=3 SV=1	uniprot-cflo3AUP000000311:tr|E2AC10|E2AC10_CAMFO DNA-directed RNA polymerase OS=Camponotus floridanus GN=EAG_13478 PE=3 SV=1	uniprot-sinv3AUP000006539:tr|E9IBL8|E9IBL8_SOLIN DNA-directed RNA polymerase (Fragment) OS=Solenopsis invicta GN=SINV_09846 PE=3 SV=1
OMA01665	Amelprot:gi|571544127|ref|XP_006563845.1| PREDICTED: probable ATP-dependent RNA helicase kurz isoform X1 [Apis mellifera]	Cfelprot80:comp65926_c0_seq2_165_3556	Cfloprot:gi|752882311|ref|XP_011258798.1| PREDICTED: LOW QUALITY PROTEIN: probable ATP-dependent RNA helicase kurz [Camponotus floridanus]	Sinvprot:gi|751202251|ref|XP_011171158.1| PREDICTED: probable ATP-dependent RNA helicase kurz [Solenopsis invicta]	uniprot-apis3AUP000005203:tr|A0A087ZYB4|A0A087ZYB4_APIME Uncharacterized protein OS=Apis mellifera GN=kz PE=4 SV=1	uniprot-cflo3AUP000000311:tr|E2AIT2|E2AIT2_CAMFO Probable ATP-dependent RNA helicase kurz OS=Camponotus floridanus GN=EAG_02795 PE=4 SV=1	uniprot-sinv3AUP000006539:tr|E9IBM0|E9IBM0_SOLIN Putative uncharacterized protein (Fragment) OS=Solenopsis invicta GN=SINV_01217 PE=4 SV=1
OMA03062	Amelprot:gi|571539647|ref|XP_006565505.1| PREDICTED: MTSS1-like protein-like isoform X1 [Apis mellifera]	Cfelprot80:comp66346_c0_seq8_630_3375	Cfloprot:gi|752875796|ref|XP_011255265.1| PREDICTED: uncharacterized protein LOC105250720 isoform X1 [Camponotus floridanus]	Sinvprot:gi|751202257|ref|XP_011171178.1| PREDICTED: uncharacterized protein LOC105203939 isoform X1 [Solenopsis invicta]	uniprot-apis3AUP000005203:tr|A0A087ZUD7|A0A087ZUD7_APIME Uncharacterized protein OS=Apis mellifera GN=LOC411219 PE=4 SV=1	uniprot-cflo3AUP000000311:tr|E2AC14|E2AC14_CAMFO Metastasis suppressor protein 1 OS=Camponotus floridanus GN=EAG_13482 PE=4 SV=1	uniprot-sinv3AUP000006539:tr|E9IBM2|E9IBM2_SOLIN Putative uncharacterized protein (Fragment) OS=Solenopsis invicta GN=SINV_13386 PE=4 SV=1
OMA00459	Amelprot:gi|571539643|ref|XP_006565504.1| PREDICTED: thiolester-containing protein 7 isoform X2 [Apis mellifera]	Cfelprot80:comp54511_c0_seq1_184_5716	Cfloprot:gi|752875804|ref|XP_011255270.1| PREDICTED: alpha-2-macroglobulin-like protein 1 [Camponotus floridanus]	Sinvprot:gi|751202265|ref|XP_011171215.1| PREDICTED: alpha-2-macroglobulin-like protein 1 isoform X3 [Solenopsis invicta]	uniprot-apis3AUP000005203:tr|A0A087ZUE2|A0A087ZUE2_APIME Uncharacterized protein OS=Apis mellifera GN=LOC100577076 PE=4 SV=1	uniprot-cflo3AUP000000311:tr|E2AC15|E2AC15_CAMFO Alpha-2-macroglobulin-like protein 1 OS=Camponotus floridanus GN=EAG_13483 PE=4 SV=1	uniprot-sinv3AUP000006539:tr|E9IBM3|E9IBM3_SOLIN Putative uncharacterized protein (Fragment) OS=Solenopsis invicta GN=SINV_10929 PE=4 SV=1
OMA06808	Amelprot:gi|571529213|ref|XP_006567736.1| PREDICTED: paxillin-like isoform X3 [Apis mellifera]	Cfelprot80:comp65062_c1_seq36_471_2136	Cfloprot:gi|752887505|ref|XP_011261629.1| PREDICTED: leupaxin isoform X5 [Camponotus floridanus]	Sinvprot:gi|751202279|ref|XP_011171276.1| PREDICTED: paxillin isoform X3 [Solenopsis invicta]	uniprot-apis3AUP000005203:tr|A0A088A008|A0A088A008_APIME Uncharacterized protein OS=Apis mellifera GN=LOC551919 PE=4 SV=1	uniprot-cflo3AUP000000311:tr|E2APB8|E2APB8_CAMFO Paxillin OS=Camponotus floridanus GN=EAG_08843 PE=4 SV=1	uniprot-sinv3AUP000006539:tr|E9IBM8|E9IBM8_SOLIN Putative uncharacterized protein (Fragment) OS=Solenopsis invicta GN=SINV_03131 PE=4 SV=1
OMA13604	Amelprot:gi|66536790|ref|XP_623088.1| PREDICTED: TATA-box-binding protein-like isoform 1 [Apis mellifera]	Cfelprot80:comp40604_c0_seq1_341_1126	Cfloprot:gi|752873937|ref|XP_011254270.1| PREDICTED: TATA-box-binding protein [Camponotus floridanus]	Sinvprot:gi|751202620|ref|XP_011172810.1| PREDICTED: TATA-box-binding protein [Solenopsis invicta]	uniprot-apis3AUP000005203:tr|A0A088A767|A0A088A767_APIME Uncharacterized protein OS=Apis mellifera GN=LOC550692 PE=3 SV=1	uniprot-cflo3AUP000000311:tr|E2AA44|E2AA44_CAMFO TATA-box-binding protein OS=Camponotus floridanus GN=EAG_11812 PE=3 SV=1	uniprot-sinv3AUP000006539:tr|E9IBP8|E9IBP8_SOLIN Putative uncharacterized protein (Fragment) OS=Solenopsis invicta GN=SINV_10030 PE=3 SV=1
OMA01450	Amelprot:gi|571548991|ref|XP_006561767.1| PREDICTED: tonsoku-like protein-like [Apis mellifera]	Cfelprot80:comp65748_c0_seq1_388_4023	Cfloprot:gi|752865460|ref|XP_011269176.1| PREDICTED: tonsoku-like protein [Camponotus floridanus]	Sinvprot:gi|751202626|ref|XP_011172842.1| PREDICTED: tonsoku-like protein [Solenopsis invicta]	uniprot-apis3AUP000005203:tr|A0A087ZUZ6|A0A087ZUZ6_APIME Uncharacterized protein OS=Apis mellifera GN=LOC724663 PE=4 SV=1	uniprot-cflo3AUP000000311:tr|E2A135|E2A135_CAMFO NF-kappa-B inhibitor-like protein 2 OS=Camponotus floridanus GN=EAG_04374 PE=4 SV=1	uniprot-sinv3AUP000006539:tr|E9IBP9|E9IBP9_SOLIN Putative uncharacterized protein (Fragment) OS=Solenopsis invicta GN=SINV_04605 PE=4 SV=1
OMA02303	Amelprot:gi|571514402|ref|XP_006568813.1| PREDICTED: uncharacterized protein LOC408649 isoform X1 [Apis mellifera]	Cfelprot80:comp65410_c0_seq2_120_2643	Cfloprot:gi|752860115|ref|XP_011269601.1| PREDICTED: probable serine/threonine-protein kinase yakA [Camponotus floridanus]	Sinvprot:gi|751202640|ref|XP_011172919.1| PREDICTED: atrophin-1 isoform X1 [Solenopsis invicta]	uniprot-apis3AUP000005203:tr|A0A088AUX5|A0A088AUX5_APIME Uncharacterized protein OS=Apis mellifera GN=LOC408649 PE=4 SV=1	uniprot-cflo3AUP000000311:tr|E1ZVF4|E1ZVF4_CAMFO G/T mismatch-specific thymine DNA glycosylase OS=Camponotus floridanus GN=EAG_06353 PE=4 SV=1	uniprot-sinv3AUP000006539:tr|E9IBQ7|E9IBQ7_SOLIN Putative uncharacterized protein (Fragment) OS=Solenopsis invicta GN=SINV_14213 PE=4 SV=1
OMA11528	Amelprot:gi|571514405|ref|XP_006568814.1| PREDICTED: 26S proteasome non-ATPase regulatory subunit 6-like [Apis mellifera]	Cfelprot80:comp35824_c0_seq1_138_1254	Cfloprot:gi|752860121|ref|XP_011269632.1| PREDICTED: 26S proteasome non-ATPase regulatory subunit 6 [Camponotus floridanus]	Sinvprot:gi|751202646|ref|XP_011172944.1| PREDICTED: 26S proteasome non-ATPase regulatory subunit 6 [Solenopsis invicta]	uniprot-apis3AUP000005203:tr|A0A088AUX6|A0A088AUX6_APIME Uncharacterized protein OS=Apis mellifera GN=LOC552319 PE=4 SV=1	uniprot-cflo3AUP000000311:tr|E1ZVF5|E1ZVF5_CAMFO 26S proteasome non-ATPase regulatory subunit 6 OS=Camponotus floridanus GN=EAG_06354 PE=4 SV=1	uniprot-sinv3AUP000006539:tr|E9IBQ9|E9IBQ9_SOLIN Putative uncharacterized protein (Fragment) OS=Solenopsis invicta GN=SINV_01661 PE=4 SV=1
OMA18178	Amelprot:gi|328789790|ref|XP_003251320.1| PREDICTED: PRA1 family protein 3-like isoform 1 [Apis mellifera]	Cfelprot80:comp46347_c0_seq1_191_734	Cfloprot:gi|752860123|ref|XP_011269645.1| PREDICTED: PRA1 family protein 3 [Camponotus floridanus]	Sinvprot:gi|751202650|ref|XP_011172962.1| PREDICTED: PRA1 family protein 3 isoform X2 [Solenopsis invicta]	uniprot-apis3AUP000005203:tr|A0A088AUX7|A0A088AUX7_APIME Uncharacterized protein OS=Apis mellifera GN=LOC410130 PE=4 SV=1	uniprot-cflo3AUP000000311:tr|E1ZVF6|E1ZVF6_CAMFO PRA1 family protein 3 OS=Camponotus floridanus GN=EAG_06355 PE=4 SV=1	uniprot-sinv3AUP000006539:tr|E9IBR0|E9IBR0_SOLIN Putative uncharacterized protein (Fragment) OS=Solenopsis invicta GN=SINV_06959 PE=4 SV=1
OMA09975	Amelprot:gi|571514412|ref|XP_006568815.1| PREDICTED: UBX domain-containing protein 7-like [Apis mellifera]	Cfelprot80:comp35288_c0_seq2_421_646	Cfloprot:gi|752860125|ref|XP_011269659.1| PREDICTED: UBX domain-containing protein 7 [Camponotus floridanus]	Sinvprot:gi|751202652|ref|XP_011172973.1| PREDICTED: UBX domain-containing protein 7 [Solenopsis invicta]	uniprot-apis3AUP000005203:tr|A0A088AUT3|A0A088AUT3_APIME Uncharacterized protein OS=Apis mellifera GN=LOC409820 PE=4 SV=1	uniprot-cflo3AUP000000311:tr|E1ZVF7|E1ZVF7_CAMFO UBX domain-containing protein 7 OS=Camponotus floridanus GN=EAG_06356 PE=4 SV=1	uniprot-sinv3AUP000006539:tr|E9IBR1|E9IBR1_SOLIN Putative uncharacterized protein (Fragment) OS=Solenopsis invicta GN=SINV_03707 PE=4 SV=1
OMA06389	Amelprot:gi|328791976|ref|XP_003251662.1| PREDICTED: HAUS augmin-like complex subunit 3-like [Apis mellifera]	Cfelprot80:comp58000_c0_seq1_213_313	Cfloprot:gi|752876163|ref|XP_011255467.1| PREDICTED: HAUS augmin-like complex subunit 3 [Camponotus floridanus]	Sinvprot:gi|751202654|ref|XP_011172986.1| PREDICTED: HAUS augmin-like complex subunit 3 [Solenopsis invicta]	uniprot-apis3AUP000005203:tr|A0A088A2E3|A0A088A2E3_APIME Uncharacterized protein OS=Apis mellifera GN=LOC100576143 PE=4 SV=1	uniprot-cflo3AUP000000311:tr|E2ACG5|E2ACG5_CAMFO Putative uncharacterized protein OS=Camponotus floridanus GN=EAG_00678 PE=4 SV=1	uniprot-sinv3AUP000006539:tr|E9IBR2|E9IBR2_SOLIN Putative uncharacterized protein (Fragment) OS=Solenopsis invicta GN=SINV_15049 PE=4 SV=1
OMA01188	Amelprot:gi|328791919|ref|XP_397221.4| PREDICTED: thrombospondin-3 isoform X2 [Apis mellifera]	Cfelprot80:comp64829_c0_seq1_248_4166	Cfloprot:gi|752876155|ref|XP_011255462.1| PREDICTED: cartilage oligomeric matrix protein [Camponotus floridanus]	Sinvprot:gi|751202665|ref|XP_011173027.1| PREDICTED: cartilage oligomeric matrix protein isoform X1 [Solenopsis invicta]	uniprot-apis3AUP000005203:tr|A0A088A2A9|A0A088A2A9_APIME Uncharacterized protein OS=Apis mellifera PE=4 SV=1	uniprot-cflo3AUP000000311:tr|E2ACG0|E2ACG0_CAMFO Thrombospondin-4 OS=Camponotus floridanus GN=EAG_00673 PE=4 SV=1	uniprot-sinv3AUP000006539:tr|E9IBR5|E9IBR5_SOLIN Putative uncharacterized protein (Fragment) OS=Solenopsis invicta GN=SINV_80288 PE=4 SV=1
OMA10524	Amelprot:gi|94400905|ref|NP_001035354.1| adipokinetic hormone receptor [Apis mellifera]	Cfelprot80:comp64823_c0_seq10_586_1735	Cfloprot:gi|752876151|ref|XP_011255460.1| PREDICTED: gonadotropin-releasing hormone II receptor-like isoform X1 [Camponotus floridanus]	Sinvprot:gi|751202675|ref|XP_011173067.1| PREDICTED: gonadotropin-releasing hormone II receptor isoform X2 [Solenopsis invicta]	uniprot-apis3AUP000005203:tr|Q1XBG3|Q1XBG3_APIME AKH receptor OS=Apis mellifera GN=Akhr PE=2 SV=1	uniprot-cflo3AUP000000311:tr|E2ACF9|E2ACF9_CAMFO Gonadotropin-releasing hormone II receptor OS=Camponotus floridanus GN=EAG_00672 PE=3 SV=1	uniprot-sinv3AUP000006539:tr|E9IBR6|E9IBR6_SOLIN Putative uncharacterized protein (Fragment) OS=Solenopsis invicta GN=SINV_00261 PE=3 SV=1
OMA05310	Amelprot:gi|328789409|ref|XP_392611.4| PREDICTED: caprin homolog [Apis mellifera]	Cfelprot80:comp58172_c1_seq1_78_1950	Cfloprot:gi|752866025|ref|XP_011269485.1| PREDICTED: caprin homolog [Camponotus floridanus]	Sinvprot:gi|751202669|ref|XP_011173042.1| PREDICTED: caprin homolog [Solenopsis invicta]	uniprot-apis3AUP000005203:tr|A0A088AUR2|A0A088AUR2_APIME Uncharacterized protein OS=Apis mellifera GN=LOC409086 PE=4 SV=1	uniprot-cflo3AUP000000311:tr|E2A1N3|E2A1N3_CAMFO Caprin-1 OS=Camponotus floridanus GN=EAG_06891 PE=4 SV=1	uniprot-sinv3AUP000006539:tr|E9IBR7|E9IBR7_SOLIN Putative uncharacterized protein (Fragment) OS=Solenopsis invicta GN=SINV_09780 PE=4 SV=1
OMA17746	Amelprot:gi|571560911|ref|XP_006566641.1| PREDICTED: ubiquitin-like-conjugating enzyme ATG10-like isoform X15 [Apis mellifera]	Cfelprot80:comp65183_c0_seq2_862_1451	Cfloprot:gi|752883590|ref|XP_011259501.1| PREDICTED: ubiquitin-like-conjugating enzyme ATG10 [Camponotus floridanus]	Sinvprot:gi|751202361|ref|XP_011171711.1| PREDICTED: ubiquitin-like-conjugating enzyme ATG10 isoform X1 [Solenopsis invicta]	uniprot-apis3AUP000005203:tr|A0A088A149|A0A088A149_APIME Uncharacterized protein OS=Apis mellifera GN=LOC726781 PE=4 SV=1	uniprot-cflo3AUP000000311:tr|E2AJY9|E2AJY9_CAMFO Autophagy-related protein 10 OS=Camponotus floridanus GN=EAG_13786 PE=4 SV=1	uniprot-sinv3AUP000006539:tr|E9IBR8|E9IBR8_SOLIN Putative uncharacterized protein (Fragment) OS=Solenopsis invicta GN=SINV_14738 PE=4 SV=1
OMA08648	Amelprot:gi|571560848|ref|XP_006566625.1| PREDICTED: excitatory amino acid transporter 1-like isoform X4 [Apis mellifera]	Cfelprot80:comp67165_c1_seq1_183_1678	Cfloprot:gi|752883568|ref|XP_011259489.1| PREDICTED: excitatory amino acid transporter 1-like isoform X1 [Camponotus floridanus]	Sinvprot:gi|751202359|ref|XP_011171702.1| PREDICTED: excitatory amino acid transporter 1-like [Solenopsis invicta]	uniprot-apis3AUP000005203:tr|A0A088A150|A0A088A150_APIME Amino acid transporter OS=Apis mellifera GN=LOC409919 PE=3 SV=1	uniprot-cflo3AUP000000311:tr|E2AJY8|E2AJY8_CAMFO Amino acid transporter OS=Camponotus floridanus GN=EAG_13785 PE=3 SV=1	uniprot-sinv3AUP000006539:tr|E9IBR9|E9IBR9_SOLIN Amino acid transporter (Fragment) OS=Solenopsis invicta GN=SINV_04721 PE=3 SV=1
OMA11668	Amelprot:gi|328787006|ref|XP_394932.4| PREDICTED: galactosylgalactosylxylosylprotein 3-beta-glucuronosyltransferase P isoform X5 [Apis mellifera]	Cfelprot80:comp65789_c4_seq10_478_1632	Cfloprot:gi|752883564|ref|XP_011259487.1| PREDICTED: galactosylgalactosylxylosylprotein 3-beta-glucuronosyltransferase P-like [Camponotus floridanus]	Sinvprot:gi|751202393|ref|XP_011171825.1| PREDICTED: galactosylgalactosylxylosylprotein 3-beta-glucuronosyltransferase P [Solenopsis invicta]	uniprot-apis3AUP000005203:tr|A0A088A1W3|A0A088A1W3_APIME Uncharacterized protein OS=Apis mellifera GN=GlcAT-P PE=4 SV=1	uniprot-cflo3AUP000000311:tr|E2AJY7|E2AJY7_CAMFO Galactosylgalactosylxylosylprotein 3-beta-glucuronosyltransferase P OS=Camponotus floridanus GN=EAG_13783 PE=4 SV=1	uniprot-sinv3AUP000006539:tr|E9IBS1|E9IBS1_SOLIN Putative uncharacterized protein (Fragment) OS=Solenopsis invicta GN=SINV_08131 PE=4 SV=1
OMA08438	Amelprot:gi|571560277|ref|XP_006566529.1| PREDICTED: metabotropic glutamate receptor-like protein R-like [Apis mellifera]	Cfelprot80:comp46371_c0_seq1_206_1731	Cfloprot:gi|752883534|ref|XP_011259470.1| PREDICTED: uncharacterized protein LOC105253265 [Camponotus floridanus]	Sinvprot:gi|751202417|ref|XP_011171907.1| PREDICTED: uncharacterized protein LOC105204507 [Solenopsis invicta]	uniprot-apis3AUP000005203:tr|A0A088A197|A0A088A197_APIME Uncharacterized protein OS=Apis mellifera GN=Ame.19950 PE=4 SV=1	uniprot-cflo3AUP000000311:tr|E2AJY2|E2AJY2_CAMFO Transcription initiation factor TFIID subunit 6 OS=Camponotus floridanus GN=EAG_13778 PE=4 SV=1	uniprot-sinv3AUP000006539:tr|E9IBS6|E9IBS6_SOLIN Putative uncharacterized protein (Fragment) OS=Solenopsis invicta GN=SINV_11689 PE=4 SV=1
OMA16867	Amelprot:gi|571544259|ref|XP_394923.5| PREDICTED: alpha-ketoglutarate-dependent dioxygenase alkB homolog 7, mitochondrial-like [Apis mellifera]	Cfelprot80:comp63591_c0_seq12_310_843	Cfloprot:gi|752867026|ref|XP_011250524.1| PREDICTED: alpha-ketoglutarate-dependent dioxygenase alkB homolog 7, mitochondrial [Camponotus floridanus]	Sinvprot:gi|751202427|ref|XP_011171957.1| PREDICTED: alpha-ketoglutarate-dependent dioxygenase alkB homolog 7, mitochondrial [Solenopsis invicta]	uniprot-apis3AUP000005203:tr|A0A087ZYC3|A0A087ZYC3_APIME Uncharacterized protein OS=Apis mellifera GN=LOC411448 PE=4 SV=1	uniprot-cflo3AUP000000311:tr|E2A2T6|E2A2T6_CAMFO Alkylated DNA repair protein alkB-like protein 7 OS=Camponotus floridanus GN=EAG_04133 PE=4 SV=1	uniprot-sinv3AUP000006539:tr|E9IBS8|E9IBS8_SOLIN Putative uncharacterized protein (Fragment) OS=Solenopsis invicta GN=SINV_05637 PE=4 SV=1
OMA16809	Amelprot:gi|66532125|ref|XP_397589.2| PREDICTED: eukaryotic translation initiation factor 3 subunit J isoform 1 [Apis mellifera]	Cfelprot80:comp59740_c1_seq2_249_924	Cfloprot:gi|752867024|ref|XP_011250523.1| PREDICTED: eukaryotic translation initiation factor 3 subunit J [Camponotus floridanus]	Sinvprot:gi|751202429|ref|XP_011171970.1| PREDICTED: eukaryotic translation initiation factor 3 subunit J [Solenopsis invicta]	uniprot-apis3AUP000005203:tr|A0A088A861|A0A088A861_APIME Eukaryotic translation initiation factor 3 subunit J OS=Apis mellifera GN=Adam PE=3 SV=1	uniprot-cflo3AUP000000311:tr|E2A2T5|E2A2T5_CAMFO Eukaryotic translation initiation factor 3 subunit J OS=Camponotus floridanus GN=EAG_04132 PE=3 SV=1	uniprot-sinv3AUP000006539:tr|E9IBS9|E9IBS9_SOLIN Putative uncharacterized protein (Fragment) OS=Solenopsis invicta GN=SINV_07993 PE=3 SV=1
OMA09347	Amelprot:gi|328790508|ref|XP_624688.3| PREDICTED: microspherule protein 1-like [Apis mellifera]	Cfelprot80:comp68547_c0_seq1_75_1272	Cfloprot:gi|752867794|ref|XP_011250941.1| PREDICTED: microspherule protein 1 [Camponotus floridanus]	Sinvprot:gi|751202431|ref|XP_011171984.1| PREDICTED: microspherule protein 1 [Solenopsis invicta]	uniprot-apis3AUP000005203:tr|A0A088AJF2|A0A088AJF2_APIME Uncharacterized protein OS=Apis mellifera GN=LOC552310 PE=4 SV=1	uniprot-cflo3AUP000000311:tr|E2A3M0|E2A3M0_CAMFO Microspherule protein 1 OS=Camponotus floridanus GN=EAG_03917 PE=4 SV=1	uniprot-sinv3AUP000006539:tr|E9IBT0|E9IBT0_SOLIN Putative uncharacterized protein (Fragment) OS=Solenopsis invicta GN=SINV_06956 PE=4 SV=1
OMA05056	Amelprot:gi|571542900|ref|XP_006559624.1| PREDICTED: exocyst complex component 8 [Apis mellifera]	Cfelprot80:comp32425_c0_seq1_190_2295	Cfloprot:gi|752867800|ref|XP_011250944.1| PREDICTED: exocyst complex component 8 [Camponotus floridanus]	Sinvprot:gi|751202437|ref|XP_011172015.1| PREDICTED: exocyst complex component 8 [Solenopsis invicta]	uniprot-apis3AUP000005203:tr|A0A087ZNT1|A0A087ZNT1_APIME Uncharacterized protein OS=Apis mellifera GN=exo84 PE=4 SV=1	uniprot-cflo3AUP000000311:tr|E2A3M3|E2A3M3_CAMFO Exocyst complex component 8 OS=Camponotus floridanus GN=EAG_03920 PE=4 SV=1	uniprot-sinv3AUP000006539:tr|E9IBT5|E9IBT5_SOLIN Putative uncharacterized protein (Fragment) OS=Solenopsis invicta GN=SINV_01080 PE=4 SV=1
OMA05851	Amelprot:gi|48142864|ref|XP_397380.1| PREDICTED: eukaryotic peptide chain release factor GTP-binding subunit ERF3A [Apis mellifera]	Cfelprot80:comp38465_c0_seq2_158_1927	Cfloprot:gi|752867806|ref|XP_011250947.1| PREDICTED: eukaryotic peptide chain release factor GTP-binding subunit ERF3A isoform X2 [Camponotus floridanus]	Sinvprot:gi|751202441|ref|XP_011172040.1| PREDICTED: eukaryotic peptide chain release factor GTP-binding subunit ERF3A [Solenopsis invicta]	uniprot-apis3AUP000005203:tr|A0A088A152|A0A088A152_APIME Uncharacterized protein OS=Apis mellifera GN=Elf PE=4 SV=1	uniprot-cflo3AUP000000311:tr|E2A3M5|E2A3M5_CAMFO Eukaryotic peptide chain release factor GTP-binding subunit ERF3A OS=Camponotus floridanus GN=EAG_03922 PE=4 SV=1	uniprot-sinv3AUP000006539:tr|E9IBT7|E9IBT7_SOLIN Putative uncharacterized protein (Fragment) OS=Solenopsis invicta GN=SINV_02547 PE=4 SV=1
OMA05435	Amelprot:gi|328786986|ref|XP_397379.4| PREDICTED: acyl-CoA synthetase short-chain family member 3, mitochondrial-like isoform X2 [Apis mellifera]	Cfelprot80:comp44933_c0_seq1_164_2170	Cfloprot:gi|752867814|ref|XP_011250952.1| PREDICTED: acyl-CoA synthetase short-chain family member 3, mitochondrial isoform X1 [Camponotus floridanus]	Sinvprot:gi|751202443|ref|XP_011172053.1| PREDICTED: acyl-CoA synthetase short-chain family member 3, mitochondrial [Solenopsis invicta]	uniprot-apis3AUP000005203:tr|A0A088A1V7|A0A088A1V7_APIME Uncharacterized protein OS=Apis mellifera GN=LOC413942 PE=4 SV=1	uniprot-cflo3AUP000000311:tr|E2A3M6|E2A3M6_CAMFO Acyl-CoA synthetase short-chain family member 3, mitochondrial OS=Camponotus floridanus GN=EAG_03923 PE=4 SV=1	uniprot-sinv3AUP000006539:tr|E9IBT8|E9IBT8_SOLIN Putative uncharacterized protein (Fragment) OS=Solenopsis invicta GN=SINV_10166 PE=4 SV=1
OMA07238	Amelprot:gi|328783748|ref|XP_393479.3| PREDICTED: dnaJ homolog subfamily C member 11-like [Apis mellifera]	Cfelprot80:comp55245_c0_seq1_96_1757	Cfloprot:gi|752878384|ref|XP_011256674.1| PREDICTED: dnaJ homolog subfamily C member 11 isoform X1 [Camponotus floridanus]	Sinvprot:gi|751202449|ref|XP_011172087.1| PREDICTED: dnaJ homolog subfamily C member 11 [Solenopsis invicta]	uniprot-apis3AUP000005203:tr|A0A087ZY83|A0A087ZY83_APIME Uncharacterized protein OS=Apis mellifera GN=LOC409991 PE=4 SV=1	uniprot-cflo3AUP000000311:tr|E2AEG0|E2AEG0_CAMFO DnaJ-like protein subfamily C member 11 OS=Camponotus floridanus GN=EAG_06160 PE=4 SV=1	uniprot-sinv3AUP000006539:tr|E9IBU1|E9IBU1_SOLIN Putative uncharacterized protein (Fragment) OS=Solenopsis invicta GN=SINV_13072 PE=4 SV=1
OMA17589	Amelprot:gi|571576123|ref|XP_624943.3| PREDICTED: 40S ribosomal protein S7 [Apis mellifera]	Cfelprot80:comp66647_c0_seq1_51_626	Cfloprot:gi|752878390|ref|XP_011256677.1| PREDICTED: 40S ribosomal protein S7-like [Camponotus floridanus]	Sinvprot:gi|751202455|ref|XP_011172121.1| PREDICTED: 40S ribosomal protein S7-like [Solenopsis invicta]	uniprot-apis3AUP000005203:tr|A0A088A8A7|A0A088A8A7_APIME Uncharacterized protein OS=Apis mellifera GN=RpS7 PE=4 SV=1	uniprot-cflo3AUP000000311:tr|E2AEG2|E2AEG2_CAMFO 40S ribosomal protein S7 OS=Camponotus floridanus GN=EAG_06162 PE=4 SV=1	uniprot-sinv3AUP000006539:tr|E9IBU3|E9IBU3_SOLIN Putative uncharacterized protein (Fragment) OS=Solenopsis invicta GN=SINV_03506 PE=4 SV=1
OMA00649	Amelprot:gi|66514180|ref|XP_393481.2| PREDICTED: 5'-3' exoribonuclease 1 isoformX1 [Apis mellifera]	Cfelprot80:comp55526_c0_seq3_50_4118	Cfloprot:gi|752878403|ref|XP_011256684.1| PREDICTED: 5'-3' exoribonuclease 1 isoform X1 [Camponotus floridanus]	Sinvprot:gi|751202473|ref|XP_011172212.1| PREDICTED: 5'-3' exoribonuclease 1 isoform X2 [Solenopsis invicta]	uniprot-apis3AUP000005203:tr|A0A087ZYA0|A0A087ZYA0_APIME Uncharacterized protein OS=Apis mellifera GN=XRN1 PE=4 SV=1	uniprot-cflo3AUP000000311:tr|E2AEG9|E2AEG9_CAMFO 5'-3' exoribonuclease 1 OS=Camponotus floridanus GN=EAG_06169 PE=4 SV=1	uniprot-sinv3AUP000006539:tr|E9IBU7|E9IBU7_SOLIN Putative uncharacterized protein (Fragment) OS=Solenopsis invicta GN=SINV_11797 PE=4 SV=1
OMA02939	Amelprot:gi|571543981|ref|XP_006563824.1| PREDICTED: importin-13 isoform X2 [Apis mellifera]	Cfelprot80:comp64906_c0_seq11_3318_3472	Cfloprot:gi|752878407|ref|XP_011256687.1| PREDICTED: importin-13 [Camponotus floridanus]	Sinvprot:gi|751202475|ref|XP_011172223.1| PREDICTED: importin-13 [Solenopsis invicta]	uniprot-apis3AUP000005203:tr|A0A087ZY84|A0A087ZY84_APIME Uncharacterized protein OS=Apis mellifera GN=cdm PE=4 SV=1	uniprot-cflo3AUP000000311:tr|E2AEH0|E2AEH0_CAMFO Importin-13 OS=Camponotus floridanus GN=EAG_06170 PE=4 SV=1	uniprot-sinv3AUP000006539:tr|E9IBU8|E9IBU8_SOLIN Putative uncharacterized protein (Fragment) OS=Solenopsis invicta GN=SINV_08876 PE=4 SV=1
OMA15556	Amelprot:gi|66514111|ref|XP_394865.2| PREDICTED: thioredoxin-related transmembrane protein 2 homolog [Apis mellifera]	Cfelprot80:comp42038_c0_seq1_757_1324	Cfloprot:gi|752867970|ref|XP_011251037.1| PREDICTED: thioredoxin-related transmembrane protein 2 homolog [Camponotus floridanus]	Sinvprot:gi|751202479|ref|XP_011172242.1| PREDICTED: thioredoxin-related transmembrane protein 2 homolog [Solenopsis invicta]	uniprot-apis3AUP000005203:tr|A0A087ZY71|A0A087ZY71_APIME Uncharacterized protein OS=Apis mellifera GN=LOC411391 PE=4 SV=1	uniprot-cflo3AUP000000311:tr|E2A3S2|E2A3S2_CAMFO Thioredoxin domain-containing protein 14-like protein OS=Camponotus floridanus GN=EAG_03969 PE=4 SV=1	uniprot-sinv3AUP000006539:tr|E9IBV0|E9IBV0_SOLIN Putative uncharacterized protein (Fragment) OS=Solenopsis invicta GN=SINV_08454 PE=4 SV=1
OMA10763	Amelprot:gi|110761008|ref|XP_393830.3| PREDICTED: angio-associated migratory cell protein-like isoform X2 [Apis mellifera]	Cfelprot80:comp45056_c0_seq1_169_1377	Cfloprot:gi|752867998|ref|XP_011251053.1| PREDICTED: angio-associated migratory cell protein, partial [Camponotus floridanus]	Sinvprot:gi|751202481|ref|XP_011172252.1| PREDICTED: angio-associated migratory cell protein [Solenopsis invicta]	uniprot-apis3AUP000005203:tr|A0A088A1B2|A0A088A1B2_APIME Uncharacterized protein OS=Apis mellifera GN=LOC410350 PE=4 SV=1	uniprot-cflo3AUP000000311:tr|E2A3S1|E2A3S1_CAMFO Angio-associated migratory cell protein OS=Camponotus floridanus GN=EAG_03968 PE=4 SV=1	uniprot-sinv3AUP000006539:tr|E9IBV1|E9IBV1_SOLIN Putative uncharacterized protein (Fragment) OS=Solenopsis invicta GN=SINV_80296 PE=4 SV=1
OMA03433	Amelprot:gi|66519672|ref|XP_393828.2| PREDICTED: katanin p80 WD40 repeat-containing subunit B1 isoform X2 [Apis mellifera]	Cfelprot80:comp45431_c0_seq1_63_2906	Cfloprot:gi|752867965|ref|XP_011251035.1| PREDICTED: katanin p80 WD40 repeat-containing subunit B1-like isoform X1 [Camponotus floridanus]	Sinvprot:gi|751202489|ref|XP_011172283.1| PREDICTED: katanin p80 WD40 repeat-containing subunit B1 isoform X2 [Solenopsis invicta]	uniprot-apis3AUP000005203:tr|A0A088A1B3|A0A088A1B3_APIME Katanin p80 WD40 repeat-containing subunit B1 OS=Apis mellifera GN=kat80 PE=3 SV=1	uniprot-cflo3AUP000000311:tr|E2A3R8|E2A3R8_CAMFO Katanin p80 WD40 repeat-containing subunit B1 OS=Camponotus floridanus GN=KATNB1 PE=3 SV=1	uniprot-sinv3AUP000006539:tr|E9IBV2|E9IBV2_SOLIN Putative uncharacterized protein (Fragment) OS=Solenopsis invicta GN=SINV_07258 PE=3 SV=1
OMA10237	Amelprot:gi|66519683|ref|XP_391917.2| PREDICTED: adenosylhomocysteinase-like [Apis mellifera]	Cfelprot80:comp67682_c0_seq1_194_1450	Cfloprot:gi|752867953|ref|XP_011251028.1| PREDICTED: adenosylhomocysteinase [Camponotus floridanus]	Sinvprot:gi|751202495|ref|XP_011172316.1| PREDICTED: adenosylhomocysteinase [Solenopsis invicta]	uniprot-apis3AUP000005203:tr|A0A088A1B6|A0A088A1B6_APIME Adenosylhomocysteinase OS=Apis mellifera GN=LOC408368 PE=3 SV=1	uniprot-cflo3AUP000000311:tr|E2A3R3|E2A3R3_CAMFO Adenosylhomocysteinase OS=Camponotus floridanus GN=EAG_03960 PE=3 SV=1	uniprot-sinv3AUP000006539:tr|E9IBV6|E9IBV6_SOLIN Adenosylhomocysteinase (Fragment) OS=Solenopsis invicta GN=SINV_11592 PE=3 SV=1
OMA02520	Amelprot:gi|571559903|ref|XP_006566465.1| PREDICTED: WD repeat-containing protein 59-like isoform X1 [Apis mellifera]	Cfelprot80:comp62831_c0_seq2_3626_4043	Cfloprot:gi|752867949|ref|XP_011251026.1| PREDICTED: WD repeat-containing protein 59 isoform X2 [Camponotus floridanus]	Sinvprot:gi|751202499|ref|XP_011172338.1| PREDICTED: WD repeat-containing protein 59 isoform X1 [Solenopsis invicta]	uniprot-apis3AUP000005203:tr|A0A088A1Q1|A0A088A1Q1_APIME Uncharacterized protein OS=Apis mellifera GN=LOC410345 PE=4 SV=1	uniprot-cflo3AUP000000311:tr|E2A3R2|E2A3R2_CAMFO WD repeat-containing protein 59 OS=Camponotus floridanus GN=EAG_03959 PE=4 SV=1	uniprot-sinv3AUP000006539:tr|E9IBV7|E9IBV7_SOLIN Putative uncharacterized protein (Fragment) OS=Solenopsis invicta GN=SINV_11621 PE=4 SV=1
OMA18802	Amelprot:gi|328780829|ref|XP_395810.4| PREDICTED: ER membrane protein complex subunit 4-like isoform 1 [Apis mellifera]	Cfelprot80:comp44658_c0_seq1_220_733	Cfloprot:gi|752867939|ref|XP_011251019.1| PREDICTED: ER membrane protein complex subunit 4 [Camponotus floridanus]	Sinvprot:gi|751202509|ref|XP_011172389.1| PREDICTED: ER membrane protein complex subunit 4 [Solenopsis invicta]	uniprot-apis3AUP000005203:tr|A0A088A8C3|A0A088A8C3_APIME Uncharacterized protein OS=Apis mellifera GN=LOC412349 PE=4 SV=1	uniprot-cflo3AUP000000311:tr|E2A3R0|E2A3R0_CAMFO Transmembrane protein 85 OS=Camponotus floridanus GN=EAG_03957 PE=4 SV=1	uniprot-sinv3AUP000006539:tr|E9IBV9|E9IBV9_SOLIN Putative uncharacterized protein (Fragment) OS=Solenopsis invicta GN=SINV_02596 PE=4 SV=1
OMA00837	Amelprot:gi|571566024|ref|XP_006567056.1| PREDICTED: rapamycin-insensitive companion of mTOR [Apis mellifera]	Cfelprot80:comp66196_c0_seq1_3544_5025	Cfloprot:gi|752867937|ref|XP_011251018.1| PREDICTED: rapamycin-insensitive companion of mTOR [Camponotus floridanus]	Sinvprot:gi|751202507|ref|XP_011172377.1| PREDICTED: rapamycin-insensitive companion of mTOR [Solenopsis invicta]	uniprot-apis3AUP000005203:tr|A0A088AKI8|A0A088AKI8_APIME Uncharacterized protein OS=Apis mellifera PE=4 SV=1	uniprot-cflo3AUP000000311:tr|E2A3Q9|E2A3Q9_CAMFO Rapamycin-insensitive companion of mTOR OS=Camponotus floridanus GN=EAG_03956 PE=4 SV=1	uniprot-sinv3AUP000006539:tr|E9IBW0|E9IBW0_SOLIN Putative uncharacterized protein (Fragment) OS=Solenopsis invicta GN=SINV_03507 PE=4 SV=1
OMA07913	Amelprot:gi|571542802|ref|XP_006559598.1| PREDICTED: d-3-phosphoglycerate dehydrogenase-like isoform X1 [Apis mellifera]	Cfelprot80:comp44757_c0_seq1_289_1794	Cfloprot:gi|752882371|ref|XP_011258830.1| PREDICTED: D-3-phosphoglycerate dehydrogenase [Camponotus floridanus]	Sinvprot:gi|751202538|ref|XP_011172508.1| PREDICTED: LOW QUALITY PROTEIN: D-3-phosphoglycerate dehydrogenase [Solenopsis invicta]	uniprot-apis3AUP000005203:tr|A0A087ZP36|A0A087ZP36_APIME Uncharacterized protein OS=Apis mellifera GN=LOC725967 PE=3 SV=1	uniprot-cflo3AUP000000311:tr|E2AIV5|E2AIV5_CAMFO D-3-phosphoglycerate dehydrogenase OS=Camponotus floridanus GN=EAG_15669 PE=3 SV=1	uniprot-sinv3AUP000006539:tr|E9IBW3|E9IBW3_SOLIN Putative uncharacterized protein (Fragment) OS=Solenopsis invicta GN=SINV_07911 PE=3 SV=1
OMA03417	Amelprot:gi|571544901|ref|XP_006564617.1| PREDICTED: filaggrin-like isoform X1 [Apis mellifera]	Cfelprot80:comp66300_c7_seq5_275_2445	Cfloprot:gi|752882363|ref|XP_011258825.1| PREDICTED: LOW QUALITY PROTEIN: putative uncharacterized protein DDB_G0277255 [Camponotus floridanus]	Sinvprot:gi|751202544|ref|XP_011172531.1| PREDICTED: ubiquitin carboxyl-terminal hydrolase 15-like isoform X2 [Solenopsis invicta]	uniprot-apis3AUP000005203:tr|A0A087ZSM2|A0A087ZSM2_APIME Ubiquitin carboxyl-terminal hydrolase OS=Apis mellifera PE=3 SV=1	uniprot-cflo3AUP000000311:tr|E2AIV3|E2AIV3_CAMFO Ubiquitin carboxyl-terminal hydrolase OS=Camponotus floridanus GN=EAG_15667 PE=3 SV=1	uniprot-sinv3AUP000006539:tr|E9IBW4|E9IBW4_SOLIN Ubiquitin carboxyl-terminal hydrolase (Fragment) OS=Solenopsis invicta GN=SINV_10772 PE=3 SV=1
OMA06972	Amelprot:gi|328783223|ref|XP_393602.4| PREDICTED: D-glucuronyl C5-epimerase-like isoform X2 [Apis mellifera]	Cfelprot80:comp69450_c0_seq1_543_2003	Cfloprot:gi|752882353|ref|XP_011258819.1| PREDICTED: D-glucuronyl C5-epimerase [Camponotus floridanus]	Sinvprot:gi|751202570|ref|XP_011172624.1| PREDICTED: D-glucuronyl C5-epimerase [Solenopsis invicta]	uniprot-apis3AUP000005203:tr|A0A088AEE1|A0A088AEE1_APIME Uncharacterized protein OS=Apis mellifera GN=LOC410118 PE=4 SV=1	uniprot-cflo3AUP000000311:tr|E2AIU8|E2AIU8_CAMFO D-glucuronyl C5-epimerase OS=Camponotus floridanus GN=EAG_15662 PE=4 SV=1	uniprot-sinv3AUP000006539:tr|E9IBW9|E9IBW9_SOLIN Putative uncharacterized protein (Fragment) OS=Solenopsis invicta GN=SINV_12711 PE=4 SV=1
OMA03627	Amelprot:gi|328792748|ref|XP_003251770.1| PREDICTED: uncharacterized protein C17orf104-like [Apis mellifera]	Cfelprot80:comp62454_c0_seq1_175_2695	Cfloprot:gi|752882457|ref|XP_011258879.1| PREDICTED: uncharacterized protein LOC105252914 [Camponotus floridanus]	Sinvprot:gi|751202586|ref|XP_011172684.1| PREDICTED: uncharacterized protein LOC105205085 isoform X1 [Solenopsis invicta]	uniprot-apis3AUP000005203:tr|A0A088AQN2|A0A088AQN2_APIME Uncharacterized protein OS=Apis mellifera GN=LOC100578146 PE=4 SV=1	uniprot-cflo3AUP000000311:tr|E2AIU0|E2AIU0_CAMFO Uncharacterized protein FLJ35848 OS=Camponotus floridanus GN=EAG_15654 PE=4 SV=1	uniprot-sinv3AUP000006539:tr|E9IBX9|E9IBX9_SOLIN Putative uncharacterized protein (Fragment) OS=Solenopsis invicta GN=SINV_12170 PE=4 SV=1
OMA10463	Amelprot:gi|328779716|ref|XP_393137.3| PREDICTED: UPF0183 protein CG7083-like [Apis mellifera]	Cfelprot80:comp37807_c0_seq1_427_1675	Cfloprot:gi|752883440|ref|XP_011259419.1| PREDICTED: UPF0183 protein CG7083 isoform X1 [Camponotus floridanus]	Sinvprot:gi|751202600|ref|XP_011172731.1| PREDICTED: UPF0183 protein CG7083 [Solenopsis invicta]	uniprot-apis3AUP000005203:tr|A0A088AJ10|A0A088AJ10_APIME Uncharacterized protein OS=Apis mellifera GN=LOC409639 PE=4 SV=1	uniprot-cflo3AUP000000311:tr|E2AJV7|E2AJV7_CAMFO UPF0183 protein CG7083 OS=Camponotus floridanus GN=EAG_13752 PE=4 SV=1	uniprot-sinv3AUP000006539:tr|E9IBY1|E9IBY1_SOLIN Putative uncharacterized protein (Fragment) OS=Solenopsis invicta GN=SINV_07382 PE=4 SV=1
OMA10937	Amelprot:gi|66530010|ref|XP_625095.1| PREDICTED: hydroxysteroid dehydrogenase-like protein 2-like isoform X2 [Apis mellifera]	Cfelprot80:comp67093_c0_seq1_401_1507	Cfloprot:gi|752883438|ref|XP_011259418.1| PREDICTED: hydroxysteroid dehydrogenase-like protein 2 [Camponotus floridanus]	Sinvprot:gi|751202602|ref|XP_011172738.1| PREDICTED: hydroxysteroid dehydrogenase-like protein 2 [Solenopsis invicta]	uniprot-apis3AUP000005203:tr|A0A088AIP8|A0A088AIP8_APIME Uncharacterized protein OS=Apis mellifera GN=LOC552717 PE=4 SV=1	uniprot-cflo3AUP000000311:tr|E2AJV5|E2AJV5_CAMFO Hydroxysteroid dehydrogenase-like protein 2 OS=Camponotus floridanus GN=EAG_13750 PE=4 SV=1	uniprot-sinv3AUP000006539:tr|E9IBY2|E9IBY2_SOLIN Putative uncharacterized protein (Fragment) OS=Solenopsis invicta GN=SINV_12515 PE=4 SV=1
OMA02700	Amelprot:gi|328788352|ref|XP_392371.3| PREDICTED: 5'-3' exoribonuclease 2 homolog [Apis mellifera]	Cfelprot80:comp62833_c0_seq1_92_2846	Cfloprot:gi|752871751|ref|XP_011253087.1| PREDICTED: 5'-3' exoribonuclease 2 homolog [Camponotus floridanus]	Sinvprot:gi|751202616|ref|XP_011172786.1| PREDICTED: 5'-3' exoribonuclease 2 homolog [Solenopsis invicta]	uniprot-apis3AUP000005203:tr|A0A087ZZT3|A0A087ZZT3_APIME Uncharacterized protein OS=Apis mellifera GN=LOC408840 PE=4 SV=1	uniprot-cflo3AUP000000311:tr|E2A7U7|E2A7U7_CAMFO 5'-3' exoribonuclease 2-like protein OS=Camponotus floridanus GN=EAG_07437 PE=4 SV=1	uniprot-sinv3AUP000006539:tr|E9IBY6|E9IBY6_SOLIN Putative uncharacterized protein (Fragment) OS=Solenopsis invicta GN=SINV_00544 PE=4 SV=1
OMA10572	Amelprot:gi|328776105|ref|XP_393772.3| PREDICTED: dipeptidase 1-like [Apis mellifera]	Cfelprot80:comp44965_c0_seq1_619_1896	Cfloprot:gi|752887171|ref|XP_011261449.1| PREDICTED: dipeptidase 1-like [Camponotus floridanus]	Sinvprot:gi|751202697|ref|XP_011173169.1| PREDICTED: dipeptidase 1-like [Solenopsis invicta]	uniprot-apis3AUP000005203:tr|A0A088A5Q6|A0A088A5Q6_APIME Dipeptidase OS=Apis mellifera GN=LOC410291 PE=3 SV=1	uniprot-cflo3AUP000000311:tr|E2AP25|E2AP25_CAMFO Dipeptidase OS=Camponotus floridanus GN=EAG_03628 PE=3 SV=1	uniprot-sinv3AUP000006539:tr|E9IBZ0|E9IBZ0_SOLIN Dipeptidase (Fragment) OS=Solenopsis invicta GN=SINV_00561 PE=3 SV=1
OMA17783	Amelprot:gi|571540050|ref|XP_006568337.1| PREDICTED: dynein light chain 1, axonemal-like isoform X1 [Apis mellifera]	Cfelprot80:comp63683_c0_seq2_415_996	Cfloprot:gi|752887191|ref|XP_011261460.1| PREDICTED: dynein light chain 1, axonemal-like [Camponotus floridanus]	Sinvprot:gi|751202722|ref|XP_011173281.1| PREDICTED: dynein light chain 1, axonemal-like [Solenopsis invicta]	uniprot-apis3AUP000005203:tr|A0A087ZZH0|A0A087ZZH0_APIME Uncharacterized protein OS=Apis mellifera GN=LOC411197 PE=4 SV=1	uniprot-cflo3AUP000000311:tr|E2AP37|E2AP37_CAMFO Dynein light chain 1, axonemal OS=Camponotus floridanus GN=EAG_03640 PE=4 SV=1	uniprot-sinv3AUP000006539:tr|E9IBZ7|E9IBZ7_SOLIN Putative uncharacterized protein (Fragment) OS=Solenopsis invicta GN=SINV_09864 PE=4 SV=1
OMA22209	Amelprot:gi|571544763|ref|XP_006564597.1| PREDICTED: putative acyl-CoA-binding protein-like [Apis mellifera]	Cfelprot80:comp43278_c0_seq1_275_534	Cfloprot:gi|752892008|ref|XP_011264067.1| PREDICTED: acyl-CoA-binding protein homolog isoform X1 [Camponotus floridanus]	Sinvprot:gi|751202736|ref|XP_011173355.1| PREDICTED: acyl-CoA-binding protein homolog isoform X2 [Solenopsis invicta]	uniprot-apis3AUP000005203:tr|A0A087ZSM9|A0A087ZSM9_APIME Uncharacterized protein OS=Apis mellifera GN=LOC411272 PE=4 SV=1	uniprot-cflo3AUP000000311:tr|E2AUA4|E2AUA4_CAMFO Acyl-CoA-binding protein-like protein OS=Camponotus floridanus GN=EAG_02942 PE=4 SV=1	uniprot-sinv3AUP000006539:tr|E9IC06|E9IC06_SOLIN Putative uncharacterized protein (Fragment) OS=Solenopsis invicta GN=SINV_12596 PE=4 SV=1
OMA16865	Amelprot:gi|66519029|ref|XP_393466.2| PREDICTED: transmembrane emp24 domain-containing protein 5 [Apis mellifera]	Cfelprot80:comp65135_c1_seq2_359_982	Cfloprot:gi|752892000|ref|XP_011264063.1| PREDICTED: transmembrane emp24 domain-containing protein 1 isoform X1 [Camponotus floridanus]	Sinvprot:gi|751202740|ref|XP_011173376.1| PREDICTED: transmembrane emp24 domain-containing protein 5-like [Solenopsis invicta]	uniprot-apis3AUP000005203:tr|A0A087ZW69|A0A087ZW69_APIME Uncharacterized protein OS=Apis mellifera GN=loj PE=3 SV=1	uniprot-cflo3AUP000000311:tr|E2AUA2|E2AUA2_CAMFO Transmembrane emp24 domain-containing protein 1 OS=Camponotus floridanus GN=EAG_02940 PE=3 SV=1	uniprot-sinv3AUP000006539:tr|E9IC16|E9IC16_SOLIN Putative uncharacterized protein (Fragment) OS=Solenopsis invicta GN=SINV_03394 PE=4 SV=1
OMA15810	Amelprot:gi|328776999|ref|XP_001121683.2| PREDICTED: uncharacterized protein LOC725889 [Apis mellifera]	Cfelprot80:comp56125_c0_seq3_355_1042	Cfloprot:gi|752881079|ref|XP_011258128.1| PREDICTED: uncharacterized protein LOC105252462 [Camponotus floridanus]	Sinvprot:gi|751202777|ref|XP_011173627.1| PREDICTED: uncharacterized protein LOC105205804 [Solenopsis invicta]	uniprot-apis3AUP000005203:tr|A0A088A4I2|A0A088A4I2_APIME Uncharacterized protein OS=Apis mellifera GN=LOC725889 PE=4 SV=1	uniprot-cflo3AUP000000311:tr|E2AHI6|E2AHI6_CAMFO Putative uncharacterized protein OS=Camponotus floridanus GN=EAG_03447 PE=4 SV=1	uniprot-sinv3AUP000006539:tr|E9IC37|E9IC37_SOLIN Putative uncharacterized protein (Fragment) OS=Solenopsis invicta GN=SINV_12309 PE=4 SV=1
OMA10341	Amelprot:gi|571573348|ref|XP_006558318.1| PREDICTED: protein roadkill-like isoform X6 [Apis mellifera]	Cfelprot80:comp45947_c0_seq2_489_1781	Cfloprot:gi|752874200|ref|XP_011254411.1| PREDICTED: speckle-type POZ protein isoform X2 [Camponotus floridanus]	Sinvprot:gi|751202783|ref|XP_011173659.1| PREDICTED: speckle-type POZ protein isoform X2 [Solenopsis invicta]	uniprot-apis3AUP000005203:tr|A0A088A4J5|A0A088A4J5_APIME Uncharacterized protein OS=Apis mellifera GN=LOC411827 PE=4 SV=1	uniprot-cflo3AUP000000311:tr|E2AAC9|E2AAC9_CAMFO Protein roadkill OS=Camponotus floridanus GN=EAG_11661 PE=4 SV=1	uniprot-sinv3AUP000006539:tr|E9IC39|E9IC39_SOLIN Putative uncharacterized protein (Fragment) OS=Solenopsis invicta GN=SINV_80191 PE=4 SV=1
OMA19333	Amelprot:gi|48101893|ref|XP_392721.1| PREDICTED: protein Dr1 isoform 2 [Apis mellifera]	Cfelprot80:comp54140_c0_seq1_166_639	Cfloprot:gi|752873898|ref|XP_011254249.1| PREDICTED: protein Dr1 [Camponotus floridanus]	Sinvprot:gi|751202822|ref|XP_011173867.1| PREDICTED: protein Dr1 [Solenopsis invicta]	uniprot-apis3AUP000005203:tr|A0A087ZNT0|A0A087ZNT0_APIME Uncharacterized protein OS=Apis mellifera PE=4 SV=1	uniprot-cflo3AUP000000311:tr|E2AA31|E2AA31_CAMFO Protein Dr1 OS=Camponotus floridanus GN=EAG_14202 PE=4 SV=1	uniprot-sinv3AUP000006539:tr|E9IC58|E9IC58_SOLIN Putative uncharacterized protein (Fragment) OS=Solenopsis invicta GN=SINV_03628 PE=4 SV=1
OMA11208	Amelprot:gi|571575934|ref|XP_006559446.1| PREDICTED: innexin inx3 [Apis mellifera]	Cfelprot80:comp61035_c0_seq1_405_1537	Cfloprot:gi|752892669|ref|XP_011264432.1| PREDICTED: innexin inx3 [Camponotus floridanus]	Sinvprot:gi|751202844|ref|XP_011173958.1| PREDICTED: innexin inx3 [Solenopsis invicta]	uniprot-apis3AUP000005203:tr|A0A088AID2|A0A088AID2_APIME Innexin OS=Apis mellifera GN=inx3 PE=3 SV=1	uniprot-cflo3AUP000000311:tr|E2AUZ7|E2AUZ7_CAMFO Innexin OS=Camponotus floridanus GN=inx PE=3 SV=1	uniprot-sinv3AUP000006539:tr|E9IC77|E9IC77_SOLIN Innexin (Fragment) OS=Solenopsis invicta GN=inx PE=3 SV=1
OMA03092	Amelprot:gi|328783791|ref|XP_623798.2| PREDICTED: cytosolic 10-formyltetrahydrofolate dehydrogenase isoform X3 [Apis mellifera]	Cfelprot80:comp42123_c0_seq1_418_3064	Cfloprot:gi|752867980|ref|XP_011251043.1| PREDICTED: cytosolic 10-formyltetrahydrofolate dehydrogenase [Camponotus floridanus]	Sinvprot:gi|751202846|ref|XP_011173964.1| PREDICTED: cytosolic 10-formyltetrahydrofolate dehydrogenase [Solenopsis invicta]	uniprot-apis3AUP000005203:tr|A0A087ZYB7|A0A087ZYB7_APIME 10-formyltetrahydrofolate dehydrogenase OS=Apis mellifera GN=ALDH1L2 PE=3 SV=1	uniprot-cflo3AUP000000311:tr|E2A3S4|E2A3S4_CAMFO 10-formyltetrahydrofolate dehydrogenase OS=Camponotus floridanus GN=EAG_03971 PE=3 SV=1	uniprot-sinv3AUP000006539:tr|E9IC80|E9IC80_SOLIN Putative uncharacterized protein (Fragment) OS=Solenopsis invicta GN=SINV_03911 PE=3 SV=1
OMA10251	Amelprot:gi|571560348|ref|XP_006566542.1| PREDICTED: FAS-associated factor 2 [Apis mellifera]	Cfelprot80:comp46074_c0_seq1_359_1633	Cfloprot:gi|752878413|ref|XP_011256690.1| PREDICTED: FAS-associated factor 2 [Camponotus floridanus]	Sinvprot:gi|751202866|ref|XP_011174018.1| PREDICTED: LOW QUALITY PROTEIN: FAS-associated factor 2, partial [Solenopsis invicta]	uniprot-apis3AUP000005203:tr|A0A088A1S9|A0A088A1S9_APIME Uncharacterized protein OS=Apis mellifera GN=Faf PE=4 SV=1	uniprot-cflo3AUP000000311:tr|E2AEH1|E2AEH1_CAMFO UBX domain-containing protein 8-A OS=Camponotus floridanus GN=EAG_06171 PE=4 SV=1	uniprot-sinv3AUP000006539:tr|E9IC82|E9IC82_SOLIN Putative uncharacterized protein (Fragment) OS=Solenopsis invicta GN=SINV_05733 PE=4 SV=1
OMA17220	Amelprot:gi|110761044|ref|XP_001121442.1| PREDICTED: serine/threonine-protein kinase RIO3-like isoform X1 [Apis mellifera]	Cfelprot80:comp46641_c0_seq1_2757_3335	Cfloprot:gi|752878415|ref|XP_011256691.1| PREDICTED: serine/threonine-protein kinase RIO3-like [Camponotus floridanus]	Sinvprot:gi|751202868|ref|XP_011174028.1| PREDICTED: serine/threonine-protein kinase RIO3-like [Solenopsis invicta]	uniprot-apis3AUP000005203:tr|A0A088A191|A0A088A191_APIME Uncharacterized protein OS=Apis mellifera GN=LOC725615 PE=4 SV=1	uniprot-cflo3AUP000000311:tr|E2AEH2|E2AEH2_CAMFO Serine/threonine-protein kinase RIO3 OS=Camponotus floridanus GN=EAG_06172 PE=4 SV=1	uniprot-sinv3AUP000006539:tr|E9IC83|E9IC83_SOLIN Putative uncharacterized protein (Fragment) OS=Solenopsis invicta GN=SINV_07519 PE=4 SV=1
OMA03907	Amelprot:gi|328791283|ref|XP_001119971.2| PREDICTED: uncharacterized protein LOC724201 isoform X1 [Apis mellifera]	Cfelprot80:comp62968_c0_seq10_300_2710	Cfloprot:gi|752891976|ref|XP_011264050.1| PREDICTED: uncharacterized protein LOC105256093 [Camponotus floridanus]	Sinvprot:gi|751202906|ref|XP_011174180.1| PREDICTED: uncharacterized protein LOC105206371 [Solenopsis invicta]	uniprot-apis3AUP000005203:tr|A0A087ZW66|A0A087ZW66_APIME Uncharacterized protein OS=Apis mellifera GN=LOC724201 PE=4 SV=1	uniprot-cflo3AUP000000311:tr|E2AU98|E2AU98_CAMFO Putative uncharacterized protein OS=Camponotus floridanus GN=EAG_02936 PE=4 SV=1	uniprot-sinv3AUP000006539:tr|E9IC95|E9IC95_SOLIN Putative uncharacterized protein (Fragment) OS=Solenopsis invicta GN=SINV_02986 PE=4 SV=1
OMA00692	Amelprot:gi|571563112|ref|XP_006570555.1| PREDICTED: ERC protein 2 [Apis mellifera]	Cfelprot80:comp59117_c0_seq1_1_4853	Cfloprot:gi|752891988|ref|XP_011264056.1| PREDICTED: uncharacterized protein LOC105256098 isoform X1 [Camponotus floridanus]	Sinvprot:gi|751202920|ref|XP_011174233.1| PREDICTED: uncharacterized protein LOC105206430 [Solenopsis invicta]	uniprot-apis3AUP000005203:tr|A0A087ZWH5|A0A087ZWH5_APIME Uncharacterized protein OS=Apis mellifera GN=chif PE=4 SV=1	uniprot-cflo3AUP000000311:tr|E2AUA0|E2AUA0_CAMFO Protein chiffon OS=Camponotus floridanus GN=EAG_02938 PE=4 SV=1	uniprot-sinv3AUP000006539:tr|E9ICA0|E9ICA0_SOLIN Putative uncharacterized protein (Fragment) OS=Solenopsis invicta GN=SINV_05107 PE=4 SV=1
OMA12852	Amelprot:gi|328783348|ref|XP_003250277.1| PREDICTED: nuclear inhibitor of protein phosphatase 1 isoform X1 [Apis mellifera]	Cfelprot80:comp33766_c0_seq2_527_1555	Cfloprot:gi|752867211|ref|XP_011250622.1| PREDICTED: nuclear inhibitor of protein phosphatase 1 [Camponotus floridanus]	Sinvprot:gi|751202926|ref|XP_011174253.1| PREDICTED: nuclear inhibitor of protein phosphatase 1 [Solenopsis invicta]	uniprot-apis3AUP000005203:tr|A0A088AFE5|A0A088AFE5_APIME Uncharacterized protein OS=Apis mellifera GN=NiPp1 PE=4 SV=1	uniprot-cflo3AUP000000311:tr|E2A2Y5|E2A2Y5_CAMFO Nuclear inhibitor of protein phosphatase 1 OS=Camponotus floridanus GN=EAG_12838 PE=4 SV=1	uniprot-sinv3AUP000006539:tr|E9ICA3|E9ICA3_SOLIN Putative uncharacterized protein (Fragment) OS=Solenopsis invicta GN=SINV_01611 PE=4 SV=1
OMA01442	Amelprot:gi|571574746|ref|XP_006563562.1| PREDICTED: dynactin subunit 1 isoform X1 [Apis mellifera]	Cfelprot80:comp59022_c1_seq7_188_4083	Cfloprot:gi|752867201|ref|XP_011250616.1| PREDICTED: dynactin subunit 1 isoform X1 [Camponotus floridanus]	Sinvprot:gi|751202928|ref|XP_011174263.1| PREDICTED: dynactin subunit 1 isoform X1 [Solenopsis invicta]	uniprot-apis3AUP000005203:tr|A0A088AEZ5|A0A088AEZ5_APIME Uncharacterized protein OS=Apis mellifera GN=Dctn1 PE=4 SV=1	uniprot-cflo3AUP000000311:tr|E2A2Y6|E2A2Y6_CAMFO Dynactin subunit 1 OS=Camponotus floridanus GN=EAG_12839 PE=4 SV=1	uniprot-sinv3AUP000006539:tr|E9ICA4|E9ICA4_SOLIN Putative uncharacterized protein (Fragment) OS=Solenopsis invicta GN=SINV_01231 PE=4 SV=1
OMA12602	Amelprot:gi|66525038|ref|XP_393612.2| PREDICTED: casein kinase I isoform alpha [Apis mellifera]	Cfelprot80:comp46562_c1_seq1_142_1150	Cfloprot:gi|752867219|ref|XP_011250627.1| PREDICTED: casein kinase I isoform alpha isoform X1 [Camponotus floridanus]	Sinvprot:gi|751202936|ref|XP_011174290.1| PREDICTED: casein kinase I isoform alpha isoform X1 [Solenopsis invicta]	uniprot-apis3AUP000005203:tr|A0A088AFE4|A0A088AFE4_APIME Uncharacterized protein OS=Apis mellifera GN=Csnk1a1 PE=4 SV=1	uniprot-cflo3AUP000000311:tr|E2A2Y7|E2A2Y7_CAMFO Casein kinase I isoform alpha OS=Camponotus floridanus GN=EAG_12840 PE=3 SV=1	uniprot-sinv3AUP000006539:tr|E9ICA5|E9ICA5_SOLIN Putative uncharacterized protein (Fragment) OS=Solenopsis invicta GN=SINV_03761 PE=3 SV=1
OMA08624	Amelprot:gi|110763556|ref|XP_001119915.1| PREDICTED: myb-like protein X-like isoform X1 [Apis mellifera]	Cfelprot80:comp65173_c1_seq2_213_1675	Cfloprot:gi|752867229|ref|XP_011250633.1| PREDICTED: uncharacterized protein LOC105247879 [Camponotus floridanus]	Sinvprot:gi|751202988|ref|XP_011174476.1| PREDICTED: uncharacterized protein LOC105206689 [Solenopsis invicta]	uniprot-apis3AUP000005203:tr|A0A088AFE2|A0A088AFE2_APIME Uncharacterized protein OS=Apis mellifera GN=LOC724160 PE=4 SV=1	uniprot-cflo3AUP000000311:tr|E2A2Z4|E2A2Z4_CAMFO Putative uncharacterized protein OS=Camponotus floridanus GN=EAG_12847 PE=4 SV=1	uniprot-sinv3AUP000006539:tr|E9ICA9|E9ICA9_SOLIN Putative uncharacterized protein (Fragment) OS=Solenopsis invicta GN=SINV_05650 PE=4 SV=1
OMA03428	Amelprot:gi|66525150|ref|XP_625196.1| PREDICTED: wolframin isoform X3 [Apis mellifera]	Cfelprot80:comp44682_c0_seq1_169_2687	Cfloprot:gi|752867233|ref|XP_011250635.1| PREDICTED: wolframin [Camponotus floridanus]	Sinvprot:gi|751202952|ref|XP_011174346.1| PREDICTED: wolframin [Solenopsis invicta]	uniprot-apis3AUP000005203:tr|A0A088AFE1|A0A088AFE1_APIME Uncharacterized protein OS=Apis mellifera GN=wfs1 PE=4 SV=1	uniprot-cflo3AUP000000311:tr|E2A2Z7|E2A2Z7_CAMFO Wolframin OS=Camponotus floridanus GN=EAG_12850 PE=4 SV=1	uniprot-sinv3AUP000006539:tr|E9ICB1|E9ICB1_SOLIN Putative uncharacterized protein (Fragment) OS=Solenopsis invicta GN=SINV_14640 PE=4 SV=1
OMA03804	Amelprot:gi|571574722|ref|XP_006563553.1| PREDICTED: uncharacterized protein LOC100577394 isoform X1 [Apis mellifera]	Cfelprot80:comp64956_c0_seq1_424_2645	Cfloprot:gi|752890172|ref|XP_011263067.1| PREDICTED: uncharacterized protein LOC105255468 [Camponotus floridanus]	Sinvprot:gi|751202966|ref|XP_011174393.1| PREDICTED: uncharacterized protein LOC105206598 [Solenopsis invicta]	uniprot-apis3AUP000005203:tr|A0A088AFD7|A0A088AFD7_APIME Uncharacterized protein OS=Apis mellifera GN=LOC100577394 PE=4 SV=1	uniprot-cflo3AUP000000311:tr|E2AS57|E2AS57_CAMFO Zinc finger protein 408 OS=Camponotus floridanus GN=EAG_12065 PE=4 SV=1	uniprot-sinv3AUP000006539:tr|E9ICB8|E9ICB8_SOLIN Putative uncharacterized protein (Fragment) OS=Solenopsis invicta GN=SINV_00181 PE=4 SV=1
OMA15813	Amelprot:gi|66525165|ref|XP_392065.2| PREDICTED: cylicin-2-like [Apis mellifera]	Cfelprot80:comp54145_c0_seq1_96_971	Cfloprot:gi|752890166|ref|XP_011263064.1| PREDICTED: upstream activation factor subunit spp27 [Camponotus floridanus]	Sinvprot:gi|751202970|ref|XP_011174406.1| PREDICTED: upstream activation factor subunit spp27 [Solenopsis invicta]	uniprot-apis3AUP000005203:tr|A0A088AFD4|A0A088AFD4_APIME Uncharacterized protein OS=Apis mellifera GN=LOC408520 PE=4 SV=1	uniprot-cflo3AUP000000311:tr|E2AS52|E2AS52_CAMFO Upstream activation factor subunit UAF30 OS=Camponotus floridanus GN=EAG_12058 PE=4 SV=1	uniprot-sinv3AUP000006539:tr|E9ICC2|E9ICC2_SOLIN Putative uncharacterized protein (Fragment) OS=Solenopsis invicta GN=SINV_05525 PE=4 SV=1
OMA12720	Amelprot:gi|328783317|ref|XP_394080.3| PREDICTED: RCC1 domain-containing protein DDB_G0279253-like [Apis mellifera]	Cfelprot80:comp47679_c1_seq3_289_1222	Cfloprot:gi|752890152|ref|XP_011263058.1| PREDICTED: RCC1 domain-containing protein 1 [Camponotus floridanus]	Sinvprot:gi|751202980|ref|XP_011174441.1| PREDICTED: RCC1 domain-containing protein 1 [Solenopsis invicta]	uniprot-apis3AUP000005203:tr|A0A088AFD2|A0A088AFD2_APIME Uncharacterized protein OS=Apis mellifera GN=LOC410602 PE=4 SV=1	uniprot-cflo3AUP000000311:tr|E2AS43|E2AS43_CAMFO RCC1 domain-containing protein 1 OS=Camponotus floridanus GN=EAG_12049 PE=4 SV=1	uniprot-sinv3AUP000006539:tr|E9ICC6|E9ICC6_SOLIN Putative uncharacterized protein (Fragment) OS=Solenopsis invicta GN=SINV_09385 PE=4 SV=1
OMA18964	Amelprot:gi|328783319|ref|XP_392067.4| PREDICTED: ADP-ribosylation factor-like protein 3-like [Apis mellifera]	Cfelprot80:comp41933_c0_seq1_77_615	Cfloprot:gi|752890154|ref|XP_011263060.1| PREDICTED: ADP-ribosylation factor-like protein 3 [Camponotus floridanus]	Sinvprot:gi|751202978|ref|XP_011174433.1| PREDICTED: ADP-ribosylation factor-like protein 3 [Solenopsis invicta]	uniprot-apis3AUP000005203:tr|A0A088AF07|A0A088AF07_APIME Uncharacterized protein OS=Apis mellifera GN=LOC408522 PE=4 SV=1	uniprot-cflo3AUP000000311:tr|E2AS41|E2AS41_CAMFO ADP-ribosylation factor-like protein 3 OS=Camponotus floridanus GN=EAG_12047 PE=3 SV=1	uniprot-sinv3AUP000006539:tr|E9ICC7|E9ICC7_SOLIN Putative uncharacterized protein (Fragment) OS=Solenopsis invicta GN=SINV_14965 PE=3 SV=1
OMA06943	Amelprot:gi|571574714|ref|XP_625215.3| PREDICTED: uncharacterized protein LOC552836 isoform 2 [Apis mellifera]	Cfelprot80:comp32602_c0_seq1_171_1415	Cfloprot:gi|752890146|ref|XP_011263055.1| PREDICTED: uncharacterized protein LOC105255458 [Camponotus floridanus]	Sinvprot:gi|751202974|ref|XP_011174420.1| PREDICTED: uncharacterized protein LOC105206635 isoform X1 [Solenopsis invicta]	uniprot-apis3AUP000005203:tr|A0A088AFD1|A0A088AFD1_APIME Uncharacterized protein OS=Apis mellifera GN=LOC552836 PE=4 SV=1	uniprot-cflo3AUP000000311:tr|E2AS40|E2AS40_CAMFO Putative uncharacterized protein OS=Camponotus floridanus GN=EAG_12046 PE=4 SV=1	uniprot-sinv3AUP000006539:tr|E9ICC8|E9ICC8_SOLIN Putative uncharacterized protein (Fragment) OS=Solenopsis invicta GN=SINV_01875 PE=4 SV=1
OMA01637	Amelprot:gi|571542211|ref|XP_006558978.1| PREDICTED: LOW QUALITY PROTEIN: serine/threonine-protein kinase 11-interacting protein-like [Apis mellifera]	Cfelprot80:comp65394_c0_seq3_1389_3733	Cfloprot:gi|752867788|ref|XP_011250938.1| PREDICTED: serine/threonine-protein kinase 11-interacting protein isoform X1 [Camponotus floridanus]	Sinvprot:gi|751203054|ref|XP_011174747.1| PREDICTED: serine/threonine-protein kinase 11-interacting protein isoform X1 [Solenopsis invicta]	uniprot-apis3AUP000005203:tr|A0A087ZQS2|A0A087ZQS2_APIME Uncharacterized protein OS=Apis mellifera GN=LOC551422 PE=4 SV=1	uniprot-cflo3AUP000000311:tr|E2A3L6|E2A3L6_CAMFO Serine/threonine kinase 11-interacting protein OS=Camponotus floridanus GN=EAG_15449 PE=4 SV=1	uniprot-sinv3AUP000006539:tr|E9ICF5|E9ICF5_SOLIN Putative uncharacterized protein (Fragment) OS=Solenopsis invicta GN=SINV_06928 PE=4 SV=1
OMA17925	Amelprot:gi|110762787|ref|XP_001120491.1| PREDICTED: ADP-ribosylation factor-like protein 4C-like isoform 1 [Apis mellifera]	Cfelprot80:comp56539_c0_seq1_482_1101	Cfloprot:gi|752897870|ref|XP_011267265.1| PREDICTED: ADP-ribosylation factor-like protein 4C [Camponotus floridanus]	Sinvprot:gi|751203066|ref|XP_011174781.1| PREDICTED: ADP-ribosylation factor-like protein 4D [Solenopsis invicta]	uniprot-apis3AUP000005203:tr|A0A088AM74|A0A088AM74_APIME Uncharacterized protein OS=Apis mellifera GN=LOC724594 PE=4 SV=1	uniprot-cflo3AUP000000311:tr|E2B0J7|E2B0J7_CAMFO ADP-ribosylation factor-like protein 4C OS=Camponotus floridanus GN=EAG_06397 PE=3 SV=1	uniprot-sinv3AUP000006539:tr|E9ICF7|E9ICF7_SOLIN Putative uncharacterized protein (Fragment) OS=Solenopsis invicta GN=SINV_80386 PE=3 SV=1
OMA02847	Amelprot:gi|328785164|ref|XP_393604.4| PREDICTED: thioredoxin domain-containing protein 11-like isoform 1 [Apis mellifera]	Cfelprot80:comp63131_c0_seq1_620_3123	Cfloprot:gi|752860629|ref|XP_011252927.1| PREDICTED: thioredoxin domain-containing protein 11 isoform X1 [Camponotus floridanus]	Sinvprot:gi|751203068|ref|XP_011174789.1| PREDICTED: thioredoxin domain-containing protein 11 [Solenopsis invicta]	uniprot-apis3AUP000005203:tr|A0A088AM71|A0A088AM71_APIME Uncharacterized protein OS=Apis mellifera GN=LOC410121 PE=4 SV=1	uniprot-cflo3AUP000000311:tr|E1ZW11|E1ZW11_CAMFO Thioredoxin domain-containing protein 11 OS=Camponotus floridanus GN=EAG_13522 PE=4 SV=1	uniprot-sinv3AUP000006539:tr|E9ICF8|E9ICF8_SOLIN Putative uncharacterized protein (Fragment) OS=Solenopsis invicta GN=SINV_06477 PE=4 SV=1
OMA01589	Amelprot:gi|571577999|ref|XP_006572246.1| PREDICTED: DNA-binding protein RFX7 [Apis mellifera]	Cfelprot80:comp46050_c0_seq1_433_4096	Cfloprot:gi|752868745|ref|XP_011251455.1| PREDICTED: DNA-binding protein RFX7 [Camponotus floridanus]	Sinvprot:gi|751203062|ref|XP_011174770.1| PREDICTED: DNA-binding protein RFX7 [Solenopsis invicta]	uniprot-apis3AUP000005203:tr|A0A088AD96|A0A088AD96_APIME Uncharacterized protein OS=Apis mellifera GN=LOC724622 PE=4 SV=1	uniprot-cflo3AUP000000311:tr|E2A4H8|E2A4H8_CAMFO Regulatory factor X domain-containing protein 2 OS=Camponotus floridanus GN=EAG_10092 PE=4 SV=1	uniprot-sinv3AUP000006539:tr|E9ICG1|E9ICG1_SOLIN Putative uncharacterized protein (Fragment) OS=Solenopsis invicta GN=SINV_03788 PE=4 SV=1
OMA01690	Amelprot:gi|66501629|ref|XP_395743.2| PREDICTED: leucine--tRNA ligase, cytoplasmic-like isoformX1 [Apis mellifera]	Cfelprot80:comp34131_c0_seq1_90_3593	Cfloprot:gi|752895770|ref|XP_011266120.1| PREDICTED: leucine--tRNA ligase, cytoplasmic [Camponotus floridanus]	Sinvprot:gi|751203078|ref|XP_011174827.1| PREDICTED: leucine--tRNA ligase, cytoplasmic-like [Solenopsis invicta]	uniprot-apis3AUP000005203:tr|A0A088AT22|A0A088AT22_APIME Uncharacterized protein OS=Apis mellifera GN=LOC412282 PE=3 SV=1	uniprot-cflo3AUP000000311:tr|E2AY59|E2AY59_CAMFO Leucyl-tRNA synthetase, cytoplasmic OS=Camponotus floridanus GN=EAG_05959 PE=4 SV=1	uniprot-sinv3AUP000006539:tr|E9ICG4|E9ICG4_SOLIN Putative uncharacterized protein (Fragment) OS=Solenopsis invicta GN=SINV_07504 PE=4 SV=1
OMA13634	Amelprot:gi|66501633|ref|XP_623182.1| PREDICTED: selenocysteine Se-methyltransferase-like [Apis mellifera]	Cfelprot80:comp45428_c0_seq1_1428_2462	Cfloprot:gi|752895744|ref|XP_011266106.1| PREDICTED: homocysteine S-methyltransferase 1-like [Camponotus floridanus]	Sinvprot:gi|751203084|ref|XP_011174845.1| PREDICTED: homocysteine S-methyltransferase 2-like [Solenopsis invicta]	uniprot-apis3AUP000005203:tr|A0A088AT34|A0A088AT34_APIME Uncharacterized protein OS=Apis mellifera GN=LOC550789 PE=4 SV=1	uniprot-cflo3AUP000000311:tr|E2AY57|E2AY57_CAMFO Homocysteine S-methyltransferase 1 OS=Camponotus floridanus GN=EAG_05957 PE=4 SV=1	uniprot-sinv3AUP000006539:tr|E9ICG5|E9ICG5_SOLIN Putative uncharacterized protein (Fragment) OS=Solenopsis invicta GN=SINV_00334 PE=4 SV=1
OMA13657	Amelprot:gi|328782294|ref|XP_003250116.1| PREDICTED: homocysteine S-methyltransferase 2-like [Apis mellifera]	Cfelprot80:comp45788_c0_seq1_754_1665	Cfloprot:gi|752895768|ref|XP_011266119.1| PREDICTED: homocysteine S-methyltransferase 3-like [Camponotus floridanus]	Sinvprot:gi|751203088|ref|XP_011174858.1| PREDICTED: homocysteine S-methyltransferase 2-like [Solenopsis invicta]	uniprot-apis3AUP000005203:tr|A0A088AT35|A0A088AT35_APIME Uncharacterized protein OS=Apis mellifera GN=LOC725816 PE=4 SV=1	uniprot-cflo3AUP000000311:tr|E2AY58|E2AY58_CAMFO Homocysteine S-methyltransferase 3 OS=Camponotus floridanus GN=EAG_05958 PE=4 SV=1	uniprot-sinv3AUP000006539:tr|E9ICG8|E9ICG8_SOLIN Putative uncharacterized protein (Fragment) OS=Solenopsis invicta GN=SINV_01371 PE=4 SV=1
OMA16377	Amelprot:gi|48103229|ref|XP_395530.1| PREDICTED: probable U2 small nuclear ribonucleoprotein A' isoform X1 [Apis mellifera]	Cfelprot80:comp68388_c0_seq1_156_791	Cfloprot:gi|752863845|ref|XP_011268295.1| PREDICTED: probable U2 small nuclear ribonucleoprotein A' [Camponotus floridanus]	Sinvprot:gi|751203148|ref|XP_011175057.1| PREDICTED: probable U2 small nuclear ribonucleoprotein A' [Solenopsis invicta]	uniprot-apis3AUP000005203:tr|A0A088ARL2|A0A088ARL2_APIME Uncharacterized protein OS=Apis mellifera GN=U2A PE=4 SV=1	uniprot-cflo3AUP000000311:tr|E1ZZG9|E1ZZG9_CAMFO Probable U2 small nuclear ribonucleoprotein A' OS=Camponotus floridanus GN=EAG_12501 PE=4 SV=1	uniprot-sinv3AUP000006539:tr|E9ICH6|E9ICH6_SOLIN Putative uncharacterized protein (Fragment) OS=Solenopsis invicta GN=SINV_15422 PE=4 SV=1
OMA14368	Amelprot:gi|571575729|ref|XP_006557848.1| PREDICTED: elongation of very long chain fatty acids protein AAEL008004-like isoform X8 [Apis mellifera]	Cfelprot80:comp60027_c0_seq1_269_1162	Cfloprot:gi|752863837|ref|XP_011268291.1| PREDICTED: elongation of very long chain fatty acids protein AAEL008004-like [Camponotus floridanus]	Sinvprot:gi|751203142|ref|XP_011175034.1| PREDICTED: elongation of very long chain fatty acids protein AAEL008004 [Solenopsis invicta]	uniprot-apis3AUP000005203:tr|A0A088ARL4|A0A088ARL4_APIME Elongation of very long chain fatty acids protein OS=Apis mellifera GN=LOC551938 PE=3 SV=1	uniprot-cflo3AUP000000311:tr|E1ZZG6|E1ZZG6_CAMFO Elongation of very long chain fatty acids protein OS=Camponotus floridanus GN=EAG_12498 PE=3 SV=1	uniprot-sinv3AUP000006539:tr|E9ICJ4|E9ICJ4_SOLIN Elongation of very long chain fatty acids protein (Fragment) OS=Solenopsis invicta GN=SINV_02682 PE=3 SV=1
OMA02641	Amelprot:gi|571528243|ref|XP_001121166.2| PREDICTED: protein PFF0380w-like isoform X1 [Apis mellifera]	Cfelprot80:comp66265_c0_seq3_838_3522	Cfloprot:gi|752866640|ref|XP_011269821.1| PREDICTED: uncharacterized protein LOC105259535 [Camponotus floridanus]	Sinvprot:gi|751203204|ref|XP_011175112.1| PREDICTED: uncharacterized protein LOC105207379 [Solenopsis invicta]	uniprot-apis3AUP000005203:tr|A0A087ZTD0|A0A087ZTD0_APIME Uncharacterized protein OS=Apis mellifera GN=LOC725298 PE=4 SV=1	uniprot-cflo3AUP000000311:tr|E2A2C9|E2A2C9_CAMFO Putative uncharacterized protein OS=Camponotus floridanus GN=EAG_12527 PE=4 SV=1	uniprot-sinv3AUP000006539:tr|E9ICK8|E9ICK8_SOLIN Putative uncharacterized protein (Fragment) OS=Solenopsis invicta GN=SINV_00919 PE=4 SV=1
OMA11027	Amelprot:gi|66516093|ref|XP_624358.1| PREDICTED: alpha-1,3/1,6-mannosyltransferase ALG2-like [Apis mellifera]	Cfelprot80:comp68155_c0_seq1_438_1563	Cfloprot:gi|752870577|ref|XP_011252447.1| PREDICTED: alpha-1,3/1,6-mannosyltransferase ALG2 [Camponotus floridanus]	Sinvprot:gi|751203206|ref|XP_011175114.1| PREDICTED: alpha-1,3/1,6-mannosyltransferase ALG2 [Solenopsis invicta]	uniprot-apis3AUP000005203:tr|A0A087ZV99|A0A087ZV99_APIME Uncharacterized protein OS=Apis mellifera GN=LOC551972 PE=4 SV=1	uniprot-cflo3AUP000000311:tr|E2A6Q0|E2A6Q0_CAMFO Alpha-1,3-mannosyltransferase ALG2 OS=Camponotus floridanus GN=EAG_05639 PE=4 SV=1	uniprot-sinv3AUP000006539:tr|E9ICL0|E9ICL0_SOLIN Putative uncharacterized protein (Fragment) OS=Solenopsis invicta GN=SINV_09245 PE=4 SV=1
OMA07701	Amelprot:gi|66522349|ref|XP_393315.2| PREDICTED: T-complex protein 1 subunit epsilon [Apis mellifera]	Cfelprot80:comp67028_c0_seq1_361_1932	Cfloprot:gi|752883660|ref|XP_011259539.1| PREDICTED: T-complex protein 1 subunit epsilon [Camponotus floridanus]	Sinvprot:gi|751203235|ref|XP_011175129.1| PREDICTED: T-complex protein 1 subunit epsilon [Solenopsis invicta]	uniprot-apis3AUP000005203:tr|A0A088AGP1|A0A088AGP1_APIME Uncharacterized protein OS=Apis mellifera GN=Cct5 PE=3 SV=1	uniprot-cflo3AUP000000311:tr|E2AK02|E2AK02_CAMFO T-complex protein 1 subunit epsilon OS=Camponotus floridanus GN=EAG_09340 PE=3 SV=1	uniprot-sinv3AUP000006539:tr|E9ICL7|E9ICL7_SOLIN Putative uncharacterized protein (Fragment) OS=Solenopsis invicta GN=SINV_10604 PE=3 SV=1
OMA16598	Amelprot:gi|110762117|ref|XP_001122114.1| PREDICTED: cysteine dioxygenase type 1-like [Apis mellifera]	Cfelprot80:comp67179_c0_seq1_500_1137	Cfloprot:gi|752869686|ref|XP_011251962.1| PREDICTED: cysteine dioxygenase type 1 [Camponotus floridanus]	Sinvprot:gi|751203237|ref|XP_011175130.1| PREDICTED: cysteine dioxygenase type 1 [Solenopsis invicta]	uniprot-apis3AUP000005203:tr|A0A088AGP4|A0A088AGP4_APIME Uncharacterized protein OS=Apis mellifera GN=LOC726371 PE=4 SV=1	uniprot-cflo3AUP000000311:tr|E2A5K5|E2A5K5_CAMFO Cysteine dioxygenase type 1 OS=Camponotus floridanus GN=EAG_07515 PE=4 SV=1	uniprot-sinv3AUP000006539:tr|E9ICL9|E9ICL9_SOLIN Putative uncharacterized protein (Fragment) OS=Solenopsis invicta GN=SINV_07900 PE=4 SV=1
OMA05339	Amelprot:gi|571569507|ref|XP_006559361.1| PREDICTED: dymeclin-like [Apis mellifera]	Cfelprot80:comp46519_c0_seq1_94_2154	Cfloprot:gi|752869668|ref|XP_011251952.1| PREDICTED: dymeclin [Camponotus floridanus]	Sinvprot:gi|751203257|ref|XP_011175141.1| PREDICTED: dymeclin isoform X2 [Solenopsis invicta]	uniprot-apis3AUP000005203:tr|A0A087ZY13|A0A087ZY13_APIME Uncharacterized protein OS=Apis mellifera GN=LOC724804 PE=4 SV=1	uniprot-cflo3AUP000000311:tr|E2A5K1|E2A5K1_CAMFO Dymeclin OS=Camponotus floridanus GN=EAG_07511 PE=4 SV=1	uniprot-sinv3AUP000006539:tr|E9ICM4|E9ICM4_SOLIN Putative uncharacterized protein (Fragment) OS=Solenopsis invicta GN=SINV_08609 PE=4 SV=1
OMA17728	Amelprot:gi|48130104|ref|XP_393312.1| PREDICTED: enhancer of split mgamma protein-like [Apis mellifera]	Cfelprot80:comp56205_c0_seq1_237_859	Cfloprot:gi|752869663|ref|XP_011251950.1| PREDICTED: enhancer of split m7 protein-like [Camponotus floridanus]	Sinvprot:gi|751203265|ref|XP_011175146.1| PREDICTED: enhancer of split mbeta protein-like [Solenopsis invicta]	uniprot-apis3AUP000005203:tr|A0A087ZY09|A0A087ZY09_APIME Uncharacterized protein OS=Apis mellifera GN=LOC409822 PE=4 SV=1	uniprot-cflo3AUP000000311:tr|E2A5J8|E2A5J8_CAMFO Enhancer of split mgamma protein OS=Camponotus floridanus GN=EAG_07508 PE=4 SV=1	uniprot-sinv3AUP000006539:tr|E9ICM7|E9ICM7_SOLIN Putative uncharacterized protein (Fragment) OS=Solenopsis invicta GN=SINV_01248 PE=4 SV=1
OMA17134	Amelprot:gi|110762524|ref|XP_001120327.1| PREDICTED: enhancer of split mbeta protein-like [Apis mellifera]	Cfelprot80:comp56205_c0_seq2_231_832	Cfloprot:gi|752892640|ref|XP_011264417.1| PREDICTED: enhancer of split mbeta protein-like [Camponotus floridanus]	Sinvprot:gi|751203259|ref|XP_011175142.1| PREDICTED: enhancer of split mbeta protein-like [Solenopsis invicta]	uniprot-apis3AUP000005203:tr|A0A087ZY19|A0A087ZY19_APIME Uncharacterized protein OS=Apis mellifera GN=LOC724465 PE=4 SV=1	uniprot-cflo3AUP000000311:tr|E2AUY1|E2AUY1_CAMFO Enhancer of split mgamma protein OS=Camponotus floridanus GN=EAG_02809 PE=4 SV=1	uniprot-sinv3AUP000006539:tr|E9ICM9|E9ICM9_SOLIN Putative uncharacterized protein (Fragment) OS=Solenopsis invicta GN=SINV_06054 PE=4 SV=1
OMA06874	Amelprot:gi|571569446|ref|XP_006559346.1| PREDICTED: tubulin polyglutamylase TTLL4-like isoform X4 [Apis mellifera]	Cfelprot80:comp61162_c0_seq1_489_2103	Cfloprot:gi|752892642|ref|XP_011264418.1| PREDICTED: tubulin polyglutamylase TTLL4-like isoform X1 [Camponotus floridanus]	Sinvprot:gi|751203261|ref|XP_011175144.1| PREDICTED: tubulin polyglutamylase TTLL4 isoform X1 [Solenopsis invicta]	uniprot-apis3AUP000005203:tr|A0A087ZY20|A0A087ZY20_APIME Uncharacterized protein OS=Apis mellifera GN=LOC413213 PE=4 SV=1	uniprot-cflo3AUP000000311:tr|E2AUY2|E2AUY2_CAMFO Tubulin polyglutamylase TTLL4 OS=Camponotus floridanus GN=EAG_02810 PE=4 SV=1	uniprot-sinv3AUP000006539:tr|E9ICN0|E9ICN0_SOLIN Putative uncharacterized protein (Fragment) OS=Solenopsis invicta GN=SINV_11277 PE=4 SV=1
OMA15983	Amelprot:gi|571569459|ref|XP_006559350.1| PREDICTED: enhancer of split mgamma protein-like isoform X2 [Apis mellifera]	Cfelprot80:comp90764_c0_seq1_1_641	Cfloprot:gi|752862342|ref|XP_011262331.1| PREDICTED: enhancer of split mgamma protein-like [Camponotus floridanus]	Sinvprot:gi|751203274|ref|XP_011175151.1| PREDICTED: enhancer of split mgamma protein-like [Solenopsis invicta]	uniprot-apis3AUP000005203:tr|A0A087ZY22|A0A087ZY22_APIME Uncharacterized protein OS=Apis mellifera GN=LOC100578067 PE=4 SV=1	uniprot-cflo3AUP000000311:tr|E1ZXU4|E1ZXU4_CAMFO Enhancer of split mgamma protein OS=Camponotus floridanus GN=EAG_05655 PE=4 SV=1	uniprot-sinv3AUP000006539:tr|E9ICN3|E9ICN3_SOLIN Putative uncharacterized protein (Fragment) OS=Solenopsis invicta GN=SINV_14741 PE=4 SV=1
OMA11075	Amelprot:gi|571569489|ref|XP_006559357.1| PREDICTED: protein gooseberry-like isoform X2 [Apis mellifera]	Cfelprot80:comp64927_c0_seq3_326_1519	Cfloprot:gi|752862344|ref|XP_011262345.1| PREDICTED: protein gooseberry-like isoform X1 [Camponotus floridanus]	Sinvprot:gi|751203276|ref|XP_011175152.1| PREDICTED: protein gooseberry [Solenopsis invicta]	uniprot-apis3AUP000005203:tr|A0A087ZY23|A0A087ZY23_APIME Uncharacterized protein OS=Apis mellifera GN=LOC411373 PE=4 SV=1	uniprot-cflo3AUP000000311:tr|E1ZXU5|E1ZXU5_CAMFO Protein gooseberry OS=Camponotus floridanus GN=EAG_05656 PE=4 SV=1	uniprot-sinv3AUP000006539:tr|E9ICN4|E9ICN4_SOLIN Putative uncharacterized protein (Fragment) OS=Solenopsis invicta GN=SINV_07081 PE=4 SV=1
OMA06698	Amelprot:gi|571569497|ref|XP_006559359.1| PREDICTED: uncharacterized protein LOC100577694 [Apis mellifera]	Cfelprot80:comp60945_c0_seq3_47_1770	Cfloprot:gi|752862352|ref|XP_011262384.1| PREDICTED: uncharacterized protein LOC105255032 isoform X1 [Camponotus floridanus]	Sinvprot:gi|751203280|ref|XP_011175154.1| PREDICTED: uncharacterized protein LOC105207409 isoform X1 [Solenopsis invicta]	uniprot-apis3AUP000005203:tr|A0A087ZY03|A0A087ZY03_APIME Uncharacterized protein OS=Apis mellifera GN=LOC100577694 PE=4 SV=1	uniprot-cflo3AUP000000311:tr|E1ZXU8|E1ZXU8_CAMFO Neuropeptide-like 1 OS=Camponotus floridanus GN=EAG_05659 PE=4 SV=1	uniprot-sinv3AUP000006539:tr|E9ICN7|E9ICN7_SOLIN Putative uncharacterized protein (Fragment) OS=Solenopsis invicta GN=SINV_10122 PE=4 SV=1
OMA13684	Amelprot:gi|571572322|ref|XP_006564992.1| PREDICTED: hydroxyphenylpyruvate reductase-like isoform X2 [Apis mellifera]	Cfelprot80:comp68608_c0_seq1_316_1180	Cfloprot:gi|752892318|ref|XP_011264239.1| PREDICTED: formate dehydrogenase, mitochondrial-like [Camponotus floridanus]	Sinvprot:gi|751203328|ref|XP_011175178.1| PREDICTED: probable 2-ketogluconate reductase [Solenopsis invicta]	uniprot-apis3AUP000005203:tr|A0A088AM81|A0A088AM81_APIME Uncharacterized protein OS=Apis mellifera GN=LOC725056 PE=4 SV=1	uniprot-cflo3AUP000000311:tr|E2AUJ7|E2AUJ7_CAMFO Glyoxylate/hydroxypyruvate reductase A OS=Camponotus floridanus GN=EAG_08985 PE=4 SV=1	uniprot-sinv3AUP000006539:tr|E9ICQ2|E9ICQ2_SOLIN Putative uncharacterized protein (Fragment) OS=Solenopsis invicta GN=SINV_06181 PE=4 SV=1
OMA16744	Amelprot:gi|66523789|ref|XP_397233.2| PREDICTED: translin [Apis mellifera]	Cfelprot80:comp46213_c0_seq1_428_923	Cfloprot:gi|752892320|ref|XP_011264240.1| PREDICTED: translin [Camponotus floridanus]	Sinvprot:gi|751203326|ref|XP_011175177.1| PREDICTED: translin [Solenopsis invicta]	uniprot-apis3AUP000005203:tr|A0A088AMH4|A0A088AMH4_APIME Uncharacterized protein OS=Apis mellifera GN=trsn PE=4 SV=1	uniprot-cflo3AUP000000311:tr|E2AUJ8|E2AUJ8_CAMFO Translin OS=Camponotus floridanus GN=EAG_08986 PE=4 SV=1	uniprot-sinv3AUP000006539:tr|E9ICQ3|E9ICQ3_SOLIN Putative uncharacterized protein (Fragment) OS=Solenopsis invicta GN=SINV_05594 PE=4 SV=1
OMA09768	Amelprot:gi|571572297|ref|XP_006564988.1| PREDICTED: origin recognition complex subunit 4 isoform X1 [Apis mellifera]	Cfelprot80:comp57469_c0_seq1_238_1564	Cfloprot:gi|752892332|ref|XP_011264245.1| PREDICTED: origin recognition complex subunit 4 [Camponotus floridanus]	Sinvprot:gi|751203336|ref|XP_011175182.1| PREDICTED: origin recognition complex subunit 4 [Solenopsis invicta]	uniprot-apis3AUP000005203:tr|A0A088AM82|A0A088AM82_APIME Origin recognition complex subunit 4 OS=Apis mellifera GN=Orc4 PE=3 SV=1	uniprot-cflo3AUP000000311:tr|E2AUK1|E2AUK1_CAMFO Origin recognition complex subunit 4 OS=Camponotus floridanus GN=EAG_08989 PE=3 SV=1	uniprot-sinv3AUP000006539:tr|E9ICQ5|E9ICQ5_SOLIN Putative uncharacterized protein (Fragment) OS=Solenopsis invicta GN=SINV_09824 PE=4 SV=1
OMA20348	Amelprot:gi|110762813|ref|XP_625009.2| PREDICTED: 60S ribosomal protein L22 isoform 1 [Apis mellifera]	Cfelprot80:comp66639_c0_seq1_68_477	Cfloprot:gi|752892372|ref|XP_011264267.1| PREDICTED: 60S ribosomal protein L22-like [Camponotus floridanus]	Sinvprot:gi|751203340|ref|XP_011175184.1| PREDICTED: 60S ribosomal protein L22-like [Solenopsis invicta]	uniprot-apis3AUP000005203:tr|A0A088AMG7|A0A088AMG7_APIME Uncharacterized protein OS=Apis mellifera GN=RpL22 PE=4 SV=1	uniprot-cflo3AUP000000311:tr|E2AUK4|E2AUK4_CAMFO 60S ribosomal protein L22 OS=Camponotus floridanus GN=EAG_08992 PE=4 SV=1	uniprot-sinv3AUP000006539:tr|E9ICQ7|E9ICQ7_SOLIN Putative uncharacterized protein (Fragment) OS=Solenopsis invicta GN=SINV_13352 PE=4 SV=1
OMA21037	Amelprot:gi|110762818|ref|XP_001120242.1| PREDICTED: synaptobrevin-like isoformX1 [Apis mellifera]	Cfelprot80:comp38008_c0_seq1_167_460	Cfloprot:gi|752892352|ref|XP_011264256.1| PREDICTED: synaptobrevin-1 [Camponotus floridanus]	Sinvprot:gi|751203348|ref|XP_011175188.1| PREDICTED: synaptobrevin-1 [Solenopsis invicta]	uniprot-apis3AUP000005203:tr|A0A088AM83|A0A088AM83_APIME Uncharacterized protein OS=Apis mellifera GN=LOC725310 PE=4 SV=1	uniprot-cflo3AUP000000311:tr|E2AUK6|E2AUK6_CAMFO Synaptobrevin-1 OS=Camponotus floridanus GN=EAG_08994 PE=4 SV=1	uniprot-sinv3AUP000006539:tr|E9ICR0|E9ICR0_SOLIN Putative uncharacterized protein (Fragment) OS=Solenopsis invicta GN=SINV_05868 PE=4 SV=1
OMA11231	Amelprot:gi|571572251|ref|XP_393999.3| PREDICTED: uncharacterized protein LOC410520 [Apis mellifera]	Cfelprot80:comp55378_c0_seq1_678_1823	Cfloprot:gi|752892366|ref|XP_011264263.1| PREDICTED: uncharacterized protein LOC105256219 [Camponotus floridanus]	Sinvprot:gi|751203364|ref|XP_011175197.1| PREDICTED: uncharacterized protein LOC105207448 [Solenopsis invicta]	uniprot-apis3AUP000005203:tr|A0A088AM84|A0A088AM84_APIME Uncharacterized protein OS=Apis mellifera GN=LOC410520 PE=4 SV=1	uniprot-cflo3AUP000000311:tr|E2AUK7|E2AUK7_CAMFO Malate dehydrogenase OS=Camponotus floridanus GN=EAG_08995 PE=4 SV=1	uniprot-sinv3AUP000006539:tr|E9ICR1|E9ICR1_SOLIN Putative uncharacterized protein (Fragment) OS=Solenopsis invicta GN=SINV_03988 PE=4 SV=1
OMA02492	Amelprot:gi|328785091|ref|XP_392015.3| PREDICTED: chloride channel protein 2-like isoform X5 [Apis mellifera]	Cfelprot80:comp62917_c0_seq11_538_3549	Cfloprot:gi|752892354|ref|XP_011264257.1| PREDICTED: chloride channel protein 2 isoform X1 [Camponotus floridanus]	Sinvprot:gi|751203358|ref|XP_011175194.1| PREDICTED: chloride channel protein 2 isoform X1 [Solenopsis invicta]	uniprot-apis3AUP000005203:tr|A0A088AM85|A0A088AM85_APIME Chloride channel protein OS=Apis mellifera GN=LOC408467 PE=3 SV=1	uniprot-cflo3AUP000000311:tr|E2AUK8|E2AUK8_CAMFO Chloride channel protein OS=Camponotus floridanus GN=EAG_08996 PE=3 SV=1	uniprot-sinv3AUP000006539:tr|E9ICR2|E9ICR2_SOLIN Chloride channel protein (Fragment) OS=Solenopsis invicta GN=SINV_00748 PE=3 SV=1
OMA05606	Amelprot:gi|328785089|ref|XP_394000.3| PREDICTED: carotenoid isomerooxygenase isoform 1 [Apis mellifera]	Cfelprot80:comp66514_c2_seq3_1656_2350	Cfloprot:gi|752885171|ref|XP_011260359.1| PREDICTED: carotenoid isomerooxygenase-like [Camponotus floridanus]	Sinvprot:gi|751203354|ref|XP_011175192.1| PREDICTED: carotenoid isomerooxygenase isoform X1 [Solenopsis invicta]	uniprot-apis3AUP000005203:tr|A0A088AMG3|A0A088AMG3_APIME Uncharacterized protein OS=Apis mellifera GN=ninaB PE=4 SV=1	uniprot-cflo3AUP000000311:tr|E2ALH6|E2ALH6_CAMFO Beta,beta-carotene 15,15'-monooxygenase OS=Camponotus floridanus GN=EAG_05467 PE=4 SV=1	uniprot-sinv3AUP000006539:tr|E9ICR3|E9ICR3_SOLIN Putative uncharacterized protein (Fragment) OS=Solenopsis invicta GN=SINV_09466 PE=4 SV=1
OMA08267	Amelprot:gi|110762820|ref|XP_624970.2| PREDICTED: facilitated trehalose transporter Tret1-like isoform X2 [Apis mellifera]	Cfelprot80:comp36353_c0_seq1_520_2065	Cfloprot:gi|752885168|ref|XP_011260358.1| PREDICTED: facilitated trehalose transporter Tret1-like [Camponotus floridanus]	Sinvprot:gi|751203366|ref|XP_011175198.1| PREDICTED: facilitated trehalose transporter Tret1-like [Solenopsis invicta]	uniprot-apis3AUP000005203:tr|A0A088AM86|A0A088AM86_APIME Uncharacterized protein OS=Apis mellifera GN=LOC552592 PE=3 SV=1	uniprot-cflo3AUP000000311:tr|E2ALH5|E2ALH5_CAMFO Sugar transporter ERD6-like 4 OS=Camponotus floridanus GN=EAG_05466 PE=3 SV=1	uniprot-sinv3AUP000006539:tr|E9ICR4|E9ICR4_SOLIN Putative uncharacterized protein (Fragment) OS=Solenopsis invicta GN=SINV_13705 PE=3 SV=1
OMA17792	Amelprot:gi|328785087|ref|XP_624958.3| PREDICTED: proteasome subunit beta type-3-like [Apis mellifera]	Cfelprot80:comp37022_c0_seq1_571_1152	Cfloprot:gi|752885164|ref|XP_011260355.1| PREDICTED: proteasome subunit beta type-3 [Camponotus floridanus]	Sinvprot:gi|751203370|ref|XP_011175200.1| PREDICTED: proteasome subunit beta type-3 [Solenopsis invicta]	uniprot-apis3AUP000005203:tr|A0A088AMG0|A0A088AMG0_APIME Proteasome subunit beta type OS=Apis mellifera GN=LOC552579 PE=3 SV=1	uniprot-cflo3AUP000000311:tr|E2ALH3|E2ALH3_CAMFO Proteasome subunit beta type OS=Camponotus floridanus GN=EAG_05464 PE=3 SV=1	uniprot-sinv3AUP000006539:tr|E9ICR6|E9ICR6_SOLIN Proteasome subunit beta type (Fragment) OS=Solenopsis invicta GN=SINV_15015 PE=3 SV=1
OMA04479	Amelprot:gi|571572493|ref|XP_006565011.1| PREDICTED: cullin-2 [Apis mellifera]	Cfelprot80:comp60316_c0_seq2_672_2920	Cfloprot:gi|752885158|ref|XP_011260352.1| PREDICTED: cullin-2 [Camponotus floridanus]	Sinvprot:gi|751203372|ref|XP_011175201.1| PREDICTED: cullin-2 [Solenopsis invicta]	uniprot-apis3AUP000005203:tr|A0A088AM88|A0A088AM88_APIME Uncharacterized protein OS=Apis mellifera GN=cul-2 PE=3 SV=1	uniprot-cflo3AUP000000311:tr|E2ALH2|E2ALH2_CAMFO Cullin-2 OS=Camponotus floridanus GN=EAG_05463 PE=3 SV=1	uniprot-sinv3AUP000006539:tr|E9ICR7|E9ICR7_SOLIN Putative uncharacterized protein (Fragment) OS=Solenopsis invicta GN=SINV_05339 PE=3 SV=1
OMA16165	Amelprot:gi|110762829|ref|XP_001121339.1| PREDICTED: homeobox protein ARX-like [Apis mellifera]	Cfelprot80:comp64263_c1_seq1_91_603	Cfloprot:gi|752885160|ref|XP_011260353.1| PREDICTED: homeobox protein ARX-like [Camponotus floridanus]	Sinvprot:gi|751203376|ref|XP_011175204.1| PREDICTED: homeobox protein ARX-like [Solenopsis invicta]	uniprot-apis3AUP000005203:tr|A0A088AMF9|A0A088AMF9_APIME Uncharacterized protein OS=Apis mellifera GN=LOC725502 PE=4 SV=1	uniprot-cflo3AUP000000311:tr|E2ALH1|E2ALH1_CAMFO Homeobox protein ARX OS=Camponotus floridanus GN=EAG_05462 PE=4 SV=1	uniprot-sinv3AUP000006539:tr|E9ICR8|E9ICR8_SOLIN Putative uncharacterized protein (Fragment) OS=Solenopsis invicta GN=SINV_12341 PE=4 SV=1
OMA20009	Amelprot:gi|66523757|ref|XP_394004.2| PREDICTED: retinal rod rhodopsin-sensitive cGMP 3',5'-cyclic phosphodiesterase subunit delta isoform X2 [Apis mellifera]	Cfelprot80:comp34271_c0_seq1_274_696	Cfloprot:gi|752885162|ref|XP_011260354.1| PREDICTED: retinal rod rhodopsin-sensitive cGMP 3',5'-cyclic phosphodiesterase subunit delta [Camponotus floridanus]	Sinvprot:gi|751203378|ref|XP_011175205.1| PREDICTED: retinal rod rhodopsin-sensitive cGMP 3',5'-cyclic phosphodiesterase subunit delta isoform X1 [Solenopsis invicta]	uniprot-apis3AUP000005203:tr|A0A088AMF8|A0A088AMF8_APIME Uncharacterized protein OS=Apis mellifera GN=PrBP PE=4 SV=1	uniprot-cflo3AUP000000311:tr|E2ALH0|E2ALH0_CAMFO Retinal rod rhodopsin-sensitive cGMP 3',5'-cyclic phosphodiesterase subunit delta OS=Camponotus floridanus GN=EAG_05461 PE=4 SV=1	uniprot-sinv3AUP000006539:tr|E9ICR9|E9ICR9_SOLIN Putative uncharacterized protein (Fragment) OS=Solenopsis invicta GN=SINV_80171 PE=4 SV=1
OMA02956	Amelprot:gi|571571726|ref|XP_006564879.1| PREDICTED: RING finger protein 207-like isoform X2 [Apis mellifera]	Cfelprot80:comp65335_c1_seq17_3402_3986	Cfloprot:gi|752885140|ref|XP_011260343.1| PREDICTED: RING finger protein 207-like isoform X1 [Camponotus floridanus]	Sinvprot:gi|751203390|ref|XP_011175210.1| PREDICTED: RING finger protein 207-like isoform X2 [Solenopsis invicta]	uniprot-apis3AUP000005203:tr|A0A088AMC3|A0A088AMC3_APIME Uncharacterized protein OS=Apis mellifera PE=4 SV=1	uniprot-cflo3AUP000000311:tr|E2ALG9|E2ALG9_CAMFO RING finger protein 207 OS=Camponotus floridanus GN=EAG_05460 PE=4 SV=1	uniprot-sinv3AUP000006539:tr|E9ICS0|E9ICS0_SOLIN Putative uncharacterized protein (Fragment) OS=Solenopsis invicta GN=SINV_80573 PE=4 SV=1
OMA02173	Amelprot:gi|328793011|ref|XP_003251811.1| PREDICTED: uncharacterized protein LOC100577766 [Apis mellifera]	Cfelprot80:comp45511_c0_seq1_107_3227	Cfloprot:gi|752885116|ref|XP_011260330.1| PREDICTED: uncharacterized protein LOC105253764 [Camponotus floridanus]	Sinvprot:gi|751203402|ref|XP_011175217.1| PREDICTED: uncharacterized protein LOC105207462 [Solenopsis invicta]	uniprot-apis3AUP000005203:tr|A0A088ABN4|A0A088ABN4_APIME Uncharacterized protein OS=Apis mellifera GN=LOC100577766 PE=4 SV=1	uniprot-cflo3AUP000000311:tr|E2ALG3|E2ALG3_CAMFO Putative uncharacterized protein OS=Camponotus floridanus GN=EAG_05454 PE=4 SV=1	uniprot-sinv3AUP000006539:tr|E9ICS9|E9ICS9_SOLIN Putative uncharacterized protein (Fragment) OS=Solenopsis invicta GN=SINV_02487 PE=4 SV=1
OMA06884	Amelprot:gi|571576965|ref|XP_006571905.1| PREDICTED: uncharacterized protein LOC409784 isoform X1 [Apis mellifera]	Cfelprot80:comp58385_c0_seq10_469_2130	Cfloprot:gi|752885106|ref|XP_011260325.1| PREDICTED: uncharacterized protein LOC105253761 isoform X2 [Camponotus floridanus]	Sinvprot:gi|751203471|ref|XP_011175254.1| PREDICTED: uncharacterized protein LOC105207465 isoform X2 [Solenopsis invicta]	uniprot-apis3AUP000005203:tr|A0A088ABN7|A0A088ABN7_APIME Uncharacterized protein OS=Apis mellifera GN=LOC409784 PE=4 SV=1	uniprot-cflo3AUP000000311:tr|E2ALF6|E2ALF6_CAMFO UPF0326 protein FAM152B OS=Camponotus floridanus GN=EAG_05447 PE=4 SV=1	uniprot-sinv3AUP000006539:tr|E9ICT4|E9ICT4_SOLIN Putative uncharacterized protein (Fragment) OS=Solenopsis invicta GN=SINV_07554 PE=4 SV=1
OMA17586	Amelprot:gi|571509105|ref|XP_006571468.1| PREDICTED: 28S ribosomal protein S11, mitochondrial isoform X1 [Apis mellifera]	Cfelprot80:comp68521_c0_seq1_132_683	Cfloprot:gi|752888948|ref|XP_011262401.1| PREDICTED: 30S ribosomal protein S11, chloroplastic [Camponotus floridanus]	Sinvprot:gi|751203540|ref|XP_011175291.1| PREDICTED: 30S ribosomal protein S11, chloroplastic [Solenopsis invicta]	uniprot-apis3AUP000005203:tr|A0A088AJ33|A0A088AJ33_APIME Uncharacterized protein OS=Apis mellifera GN=mRpS11 PE=3 SV=1	uniprot-cflo3AUP000000311:tr|E2AQW3|E2AQW3_CAMFO 30S ribosomal protein S11, chloroplastic OS=Camponotus floridanus GN=EAG_10256 PE=3 SV=1	uniprot-sinv3AUP000006539:tr|E9ICU1|E9ICU1_SOLIN Putative uncharacterized protein (Fragment) OS=Solenopsis invicta GN=SINV_08953 PE=3 SV=1
OMA10912	Amelprot:gi|571537023|ref|XP_006571032.1| PREDICTED: LOW QUALITY PROTEIN: ankyrin repeat and MYND domain-containing protein 2-like [Apis mellifera]	Cfelprot80:comp67531_c0_seq1_1_1199	Cfloprot:gi|752861760|ref|XP_011259091.1| PREDICTED: ankyrin repeat and MYND domain-containing protein 2 [Camponotus floridanus]	Sinvprot:gi|751203544|ref|XP_011175293.1| PREDICTED: ankyrin repeat and MYND domain-containing protein 2 [Solenopsis invicta]	uniprot-apis3AUP000005203:tr|A0A088A287|A0A088A287_APIME Uncharacterized protein OS=Apis mellifera PE=4 SV=1	uniprot-cflo3AUP000000311:tr|E1ZXA0|E1ZXA0_CAMFO Ankyrin repeat and MYND domain-containing protein 2 OS=Camponotus floridanus GN=EAG_14102 PE=4 SV=1	uniprot-sinv3AUP000006539:tr|E9ICU3|E9ICU3_SOLIN Putative uncharacterized protein (Fragment) OS=Solenopsis invicta GN=SINV_05901 PE=4 SV=1
OMA17247	Amelprot:gi|571506300|ref|XP_006570793.1| PREDICTED: DNA-directed RNA polymerase III subunit RPC7-like [Apis mellifera]	Cfelprot80:comp62351_c0_seq1_488_1138	Cfloprot:gi|752865213|ref|XP_011269042.1| PREDICTED: DNA-directed RNA polymerase III subunit RPC7-like [Camponotus floridanus]	Sinvprot:gi|751203557|ref|XP_011175300.1| PREDICTED: DNA-directed RNA polymerase III subunit RPC7-like isoform X2 [Solenopsis invicta]	uniprot-apis3AUP000005203:tr|A0A088A7Y5|A0A088A7Y5_APIME Uncharacterized protein OS=Apis mellifera GN=LOC102655679 PE=4 SV=1	uniprot-cflo3AUP000000311:tr|E2A0V3|E2A0V3_CAMFO DNA-directed RNA polymerase III subunit RPC7-like OS=Camponotus floridanus GN=EAG_11298 PE=4 SV=1	uniprot-sinv3AUP000006539:tr|E9ICU6|E9ICU6_SOLIN Putative uncharacterized protein (Fragment) OS=Solenopsis invicta GN=SINV_03218 PE=4 SV=1
OMA08228	Amelprot:gi|66519954|ref|XP_392911.2| PREDICTED: uncharacterized protein LOC409396 isoformX1 [Apis mellifera]	Cfelprot80:comp61506_c1_seq4_133_1623	Cfloprot:gi|752874622|ref|XP_011254638.1| PREDICTED: uncharacterized protein LOC105250317 isoform X2 [Camponotus floridanus]	Sinvprot:gi|751203613|ref|XP_011175332.1| PREDICTED: uncharacterized protein LOC105207512 isoform X1 [Solenopsis invicta]	uniprot-apis3AUP000005203:tr|A0A088A1E6|A0A088A1E6_APIME Uncharacterized protein OS=Apis mellifera GN=LOC409396 PE=4 SV=1	uniprot-cflo3AUP000000311:tr|E2AAT5|E2AAT5_CAMFO Putative uncharacterized protein OS=Camponotus floridanus GN=EAG_06659 PE=4 SV=1	uniprot-sinv3AUP000006539:tr|E9ICW2|E9ICW2_SOLIN Putative uncharacterized protein (Fragment) OS=Solenopsis invicta GN=SINV_05165 PE=4 SV=1
OMA02308	Amelprot:gi|328786781|ref|XP_396203.4| PREDICTED: DNA topoisomerase 1 isoform 2 [Apis mellifera]	Cfelprot80:comp39760_c0_seq1_318_550	Cfloprot:gi|752874618|ref|XP_011254635.1| PREDICTED: DNA topoisomerase I, mitochondrial [Camponotus floridanus]	Sinvprot:gi|751203621|ref|XP_011175336.1| PREDICTED: DNA topoisomerase I, mitochondrial isoform X1 [Solenopsis invicta]	uniprot-apis3AUP000005203:tr|A0A088A1M3|A0A088A1M3_APIME Uncharacterized protein OS=Apis mellifera GN=Top1 PE=4 SV=1	uniprot-cflo3AUP000000311:tr|E2AAT4|E2AAT4_CAMFO DNA topoisomerase 1 OS=Camponotus floridanus GN=EAG_06658 PE=4 SV=1	uniprot-sinv3AUP000006539:tr|E9ICW3|E9ICW3_SOLIN Putative uncharacterized protein (Fragment) OS=Solenopsis invicta GN=SINV_04104 PE=4 SV=1
OMA14848	Amelprot:gi|571559556|ref|XP_006566409.1| PREDICTED: uncharacterized protein LOC552753 isoform X2 [Apis mellifera]	Cfelprot80:comp55912_c0_seq1_385_1216	Cfloprot:gi|752887472|ref|XP_011261611.1| PREDICTED: uncharacterized protein LOC105254552 [Camponotus floridanus]	Sinvprot:gi|751203628|ref|XP_011175339.1| PREDICTED: uncharacterized protein LOC105207515 [Solenopsis invicta]	uniprot-apis3AUP000005203:tr|A0A088A1E7|A0A088A1E7_APIME Uncharacterized protein OS=Apis mellifera GN=LOC552753 PE=4 SV=1	uniprot-cflo3AUP000000311:tr|E2APA2|E2APA2_CAMFO Protein stand still OS=Camponotus floridanus GN=EAG_06954 PE=4 SV=1	uniprot-sinv3AUP000006539:tr|E9ICW5|E9ICW5_SOLIN Putative uncharacterized protein (Fragment) OS=Solenopsis invicta GN=SINV_11388 PE=4 SV=1
OMA11470	Amelprot:gi|328786961|ref|XP_003250866.1| PREDICTED: LOW QUALITY PROTEIN: selenide, water dikinase [Apis mellifera]	Cfelprot80:comp62533_c0_seq1_839_1685	Cfloprot:gi|752887476|ref|XP_011261614.1| PREDICTED: LOW QUALITY PROTEIN: selenide, water dikinase [Camponotus floridanus]	Sinvprot:gi|751203632|ref|XP_011175341.1| PREDICTED: LOW QUALITY PROTEIN: selenide, water dikinase [Solenopsis invicta]	uniprot-apis3AUP000005203:tr|A0A088A174|A0A088A174_APIME Uncharacterized protein OS=Apis mellifera GN=SelD PE=4 SV=1	uniprot-cflo3AUP000000311:tr|E2APA4|E2APA4_CAMFO Selenide, water dikinase OS=Camponotus floridanus GN=EAG_06956 PE=4 SV=1	uniprot-sinv3AUP000006539:tr|E9ICW7|E9ICW7_SOLIN Putative uncharacterized protein (Fragment) OS=Solenopsis invicta GN=SINV_09700 PE=4 SV=1
OMA08708	Amelprot:gi|328786964|ref|XP_391867.3| PREDICTED: ceramide kinase-like isoform X6 [Apis mellifera]	Cfelprot80:comp44629_c0_seq1_254_1723	Cfloprot:gi|752887479|ref|XP_011261615.1| PREDICTED: ceramide kinase [Camponotus floridanus]	Sinvprot:gi|751203638|ref|XP_011175344.1| PREDICTED: ceramide kinase [Solenopsis invicta]	uniprot-apis3AUP000005203:tr|A0A088A1U3|A0A088A1U3_APIME Uncharacterized protein OS=Apis mellifera GN=LOC408315 PE=4 SV=1	uniprot-cflo3AUP000000311:tr|E2APA6|E2APA6_CAMFO Ceramide kinase OS=Camponotus floridanus GN=EAG_06958 PE=4 SV=1	uniprot-sinv3AUP000006539:tr|E9ICW9|E9ICW9_SOLIN Putative uncharacterized protein (Fragment) OS=Solenopsis invicta GN=SINV_13131 PE=4 SV=1
OMA11435	Amelprot:gi|571561045|ref|XP_006566669.1| PREDICTED: evolutionarily conserved signaling intermediate in Toll pathway, mitochondrial-like [Apis mellifera]	Cfelprot80:comp70851_c0_seq1_116_1294	Cfloprot:gi|752887481|ref|XP_011261616.1| PREDICTED: evolutionarily conserved signaling intermediate in Toll pathway, mitochondrial [Camponotus floridanus]	Sinvprot:gi|751203636|ref|XP_011175343.1| PREDICTED: evolutionarily conserved signaling intermediate in Toll pathway, mitochondrial [Solenopsis invicta]	uniprot-apis3AUP000005203:tr|A0A088A142|A0A088A142_APIME Uncharacterized protein OS=Apis mellifera GN=LOC726612 PE=4 SV=1	uniprot-cflo3AUP000000311:tr|E2APA7|E2APA7_CAMFO Evolutionarily conserved signaling intermediate in Toll pathway, mitochondrial OS=Camponotus floridanus GN=EAG_06959 PE=4 SV=1	uniprot-sinv3AUP000006539:tr|E9ICX0|E9ICX0_SOLIN Putative uncharacterized protein (Fragment) OS=Solenopsis invicta GN=SINV_03076 PE=4 SV=1
OMA19785	Amelprot:gi|328787210|ref|XP_625169.2| PREDICTED: MIP18 family protein CG7949-like [Apis mellifera]	Cfelprot80:comp67908_c0_seq1_70_396	Cfloprot:gi|752881210|ref|XP_011258201.1| PREDICTED: MIP18 family protein CG7949 [Camponotus floridanus]	Sinvprot:gi|751203640|ref|XP_011175345.1| PREDICTED: MIP18 family protein CG7949 [Solenopsis invicta]	uniprot-apis3AUP000005203:tr|A0A088A1G0|A0A088A1G0_APIME Uncharacterized protein OS=Apis mellifera GN=LOC552791 PE=4 SV=1	uniprot-cflo3AUP000000311:tr|E2AHN5|E2AHN5_CAMFO UPF0195 protein CG7949 OS=Camponotus floridanus GN=EAG_11516 PE=4 SV=1	uniprot-sinv3AUP000006539:tr|E9ICX1|E9ICX1_SOLIN Putative uncharacterized protein (Fragment) OS=Solenopsis invicta GN=SINV_01457 PE=4 SV=1
OMA19494	Amelprot:gi|571578026|ref|XP_006572255.1| PREDICTED: 60S ribosomal protein L12 isoform X2 [Apis mellifera]	Cfelprot80:comp66710_c0_seq1_128_610	Cfloprot:gi|752865979|ref|XP_011269459.1| PREDICTED: 60S ribosomal protein L12 [Camponotus floridanus]	Sinvprot:gi|751203657|ref|XP_011175353.1| PREDICTED: 60S ribosomal protein L12, partial [Solenopsis invicta]	uniprot-apis3AUP000005203:tr|A0A088A6M9|A0A088A6M9_APIME Uncharacterized protein OS=Apis mellifera GN=RpL12 PE=3 SV=1	uniprot-cflo3AUP000000311:tr|E2A1L3|E2A1L3_CAMFO 60S ribosomal protein L12 OS=Camponotus floridanus GN=EAG_06871 PE=3 SV=1	uniprot-sinv3AUP000006539:tr|E9ICX6|E9ICX6_SOLIN Putative uncharacterized protein (Fragment) OS=Solenopsis invicta GN=SINV_16392 PE=3 SV=1
OMA05231	Amelprot:gi|571525983|ref|XP_006569355.1| PREDICTED: protein turtle isoform X3 [Apis mellifera]	Cfelprot80:comp66521_c0_seq3_721_2730	Cfloprot:gi|752897723|ref|XP_011267184.1| PREDICTED: protein turtle-like isoform X2 [Camponotus floridanus]	Sinvprot:gi|751203661|ref|XP_011175355.1| PREDICTED: protein turtle isoform X1 [Solenopsis invicta]	uniprot-apis3AUP000005203:tr|A0A088AN32|A0A088AN32_APIME Uncharacterized protein OS=Apis mellifera GN=IGFn3-11 PE=4 SV=1	uniprot-cflo3AUP000000311:tr|E2B0D7|E2B0D7_CAMFO Protein turtle OS=Camponotus floridanus GN=EAG_12332 PE=4 SV=1	uniprot-sinv3AUP000006539:tr|E9ICY1|E9ICY1_SOLIN Putative uncharacterized protein (Fragment) OS=Solenopsis invicta GN=SINV_06372 PE=4 SV=1
OMA04061	Amelprot:gi|328787605|ref|XP_393863.3| PREDICTED: calcium homeostasis endoplasmic reticulum protein-like isoform X2 [Apis mellifera]	Cfelprot80:comp56063_c0_seq1_1000_3177	Cfloprot:gi|752879658|ref|XP_011257363.1| PREDICTED: calcium homeostasis endoplasmic reticulum protein [Camponotus floridanus]	Sinvprot:gi|751203722|ref|XP_011175389.1| PREDICTED: calcium homeostasis endoplasmic reticulum protein isoform X1 [Solenopsis invicta]	uniprot-apis3AUP000005203:tr|A0A088AKE7|A0A088AKE7_APIME Uncharacterized protein OS=Apis mellifera GN=LOC410383 PE=4 SV=1	uniprot-cflo3AUP000000311:tr|E2AFT5|E2AFT5_CAMFO Calcium homeostasis endoplasmic reticulum protein OS=Camponotus floridanus GN=EAG_03247 PE=4 SV=1	uniprot-sinv3AUP000006539:tr|E9ID05|E9ID05_SOLIN Putative uncharacterized protein (Fragment) OS=Solenopsis invicta GN=SINV_12299 PE=4 SV=1
OMA19138	Amelprot:gi|66521444|ref|XP_393850.2| PREDICTED: actin-binding Rho-activating protein-like isoform 2 [Apis mellifera]	Cfelprot80:comp36973_c0_seq2_193_658	Cfloprot:gi|752879672|ref|XP_011257371.1| PREDICTED: actin-binding Rho-activating protein-like isoform X1 [Camponotus floridanus]	Sinvprot:gi|751203732|ref|XP_011175394.1| PREDICTED: actin-binding Rho-activating protein-like isoform X1 [Solenopsis invicta]	uniprot-apis3AUP000005203:tr|A0A088AD70|A0A088AD70_APIME Uncharacterized protein OS=Apis mellifera GN=LOC410370 PE=4 SV=1	uniprot-cflo3AUP000000311:tr|E2AFT8|E2AFT8_CAMFO Actin-binding Rho-activating protein OS=Camponotus floridanus GN=EAG_03250 PE=4 SV=1	uniprot-sinv3AUP000006539:tr|E9ID06|E9ID06_SOLIN Putative uncharacterized protein (Fragment) OS=Solenopsis invicta GN=SINV_15116 PE=4 SV=1
OMA04558	Amelprot:gi|328793565|ref|XP_392703.4| PREDICTED: ATP-dependent zinc metalloprotease YME1 homolog isoformX1 [Apis mellifera]	Cfelprot80:comp66398_c0_seq1_323_2534	Cfloprot:gi|752871455|ref|XP_011252926.1| PREDICTED: ATP-dependent zinc metalloprotease YME1 homolog [Camponotus floridanus]	Sinvprot:gi|751204365|ref|XP_011175731.1| PREDICTED: ATP-dependent zinc metalloprotease YME1 homolog [Solenopsis invicta]	uniprot-apis3AUP000005203:tr|A0A088ADA2|A0A088ADA2_APIME Uncharacterized protein OS=Apis mellifera GN=LOC409178 PE=4 SV=1	uniprot-cflo3AUP000000311:tr|E2A7K2|E2A7K2_CAMFO Protein YME1-like protein OS=Camponotus floridanus GN=EAG_03186 PE=3 SV=1	uniprot-sinv3AUP000006539:tr|E9ID19|E9ID19_SOLIN Putative uncharacterized protein (Fragment) OS=Solenopsis invicta GN=SINV_13651 PE=3 SV=1
OMA06893	Amelprot:gi|571535087|ref|XP_006565483.1| PREDICTED: patatin-like phospholipase domain-containing protein 2-like [Apis mellifera]	Cfelprot80:comp55657_c0_seq2_499_2344	Cfloprot:gi|752874408|ref|XP_011254521.1| PREDICTED: LOW QUALITY PROTEIN: patatin-like phospholipase domain-containing protein 3 [Camponotus floridanus]	Sinvprot:gi|751203764|ref|XP_011175411.1| PREDICTED: patatin-like phospholipase domain-containing protein 3 isoform X1 [Solenopsis invicta]	uniprot-apis3AUP000005203:tr|A0A087ZRM8|A0A087ZRM8_APIME Uncharacterized protein OS=Apis mellifera GN=LOC551055 PE=4 SV=1	uniprot-cflo3AUP000000311:tr|E2AAK5|E2AAK5_CAMFO Patatin-like phospholipase domain-containing protein 2 OS=Camponotus floridanus GN=EAG_03368 PE=4 SV=1	uniprot-sinv3AUP000006539:tr|E9ID22|E9ID22_SOLIN Putative uncharacterized protein (Fragment) OS=Solenopsis invicta GN=SINV_08850 PE=4 SV=1
OMA07765	Amelprot:gi|328784023|ref|XP_395360.3| PREDICTED: cytochrome P450 315a1, mitochondrial isoformX2 [Apis mellifera]	Cfelprot80:comp47274_c1_seq1_128_1376	Cfloprot:gi|752897675|ref|XP_011267156.1| PREDICTED: cytochrome P450 315a1, mitochondrial [Camponotus floridanus]	Sinvprot:gi|751203774|ref|XP_011175416.1| PREDICTED: cytochrome P450 315a1, mitochondrial [Solenopsis invicta]	uniprot-apis3AUP000005203:tr|A0A088APZ6|A0A088APZ6_APIME Uncharacterized protein OS=Apis mellifera GN=CYP315A1 PE=3 SV=1	uniprot-cflo3AUP000000311:tr|E2B079|E2B079_CAMFO Cytochrome P450 315a1, mitochondrial OS=Camponotus floridanus GN=EAG_06552 PE=3 SV=1	uniprot-sinv3AUP000006539:tr|E9ID25|E9ID25_SOLIN Putative uncharacterized protein (Fragment) OS=Solenopsis invicta GN=SINV_12229 PE=3 SV=1
OMA12405	Amelprot:gi|571519240|ref|XP_006563991.1| PREDICTED: transmembrane protein 120 homolog [Apis mellifera]	Cfelprot80:comp45253_c0_seq1_453_1515	Cfloprot:gi|752897677|ref|XP_011267157.1| PREDICTED: transmembrane protein 120 homolog [Camponotus floridanus]	Sinvprot:gi|751203776|ref|XP_011175417.1| PREDICTED: transmembrane protein 120 homolog [Solenopsis invicta]	uniprot-apis3AUP000005203:tr|A0A088APV8|A0A088APV8_APIME Uncharacterized protein OS=Apis mellifera GN=LOC552590 PE=4 SV=1	uniprot-cflo3AUP000000311:tr|E2B080|E2B080_CAMFO Transmembrane protein 120-like protein OS=Camponotus floridanus GN=EAG_06553 PE=4 SV=1	uniprot-sinv3AUP000006539:tr|E9ID26|E9ID26_SOLIN Putative uncharacterized protein (Fragment) OS=Solenopsis invicta GN=SINV_14368 PE=4 SV=1
OMA04192	Amelprot:gi|66560999|ref|XP_624950.1| PREDICTED: serine/threonine-protein kinase unc-51 [Apis mellifera]	Cfelprot80:comp64352_c0_seq1_5395_5500	Cfloprot:gi|752897681|ref|XP_011267159.1| PREDICTED: serine/threonine-protein kinase ULK2 isoform X2 [Camponotus floridanus]	Sinvprot:gi|751203778|ref|XP_011175418.1| PREDICTED: serine/threonine-protein kinase ULK2 [Solenopsis invicta]	uniprot-apis3AUP000005203:tr|A0A088APZ5|A0A088APZ5_APIME Uncharacterized protein OS=Apis mellifera GN=Atg1 PE=4 SV=1	uniprot-cflo3AUP000000311:tr|E2B082|E2B082_CAMFO Serine/threonine-protein kinase ULK2 OS=Camponotus floridanus GN=EAG_06555 PE=4 SV=1	uniprot-sinv3AUP000006539:tr|E9ID27|E9ID27_SOLIN Putative uncharacterized protein (Fragment) OS=Solenopsis invicta GN=SINV_01589 PE=4 SV=1
OMA05434	Amelprot:gi|571521091|ref|XP_006569305.1| PREDICTED: probable protein phosphatase CG10417-like [Apis mellifera]	Cfelprot80:comp59601_c0_seq1_136_2150	Cfloprot:gi|752863686|ref|XP_011268206.1| PREDICTED: probable protein phosphatase CG10417 [Camponotus floridanus]	Sinvprot:gi|751203796|ref|XP_011175428.1| PREDICTED: probable protein phosphatase CG10417 [Solenopsis invicta]	uniprot-apis3AUP000005203:tr|A0A087ZR50|A0A087ZR50_APIME Uncharacterized protein OS=Apis mellifera GN=LOC552412 PE=3 SV=1	uniprot-cflo3AUP000000311:tr|E1ZZA4|E1ZZA4_CAMFO Protein phosphatase 1G OS=Camponotus floridanus GN=EAG_09537 PE=3 SV=1	uniprot-sinv3AUP000006539:tr|E9ID32|E9ID32_SOLIN Putative uncharacterized protein (Fragment) OS=Solenopsis invicta GN=SINV_01503 PE=3 SV=1
OMA14801	Amelprot:gi|571521095|ref|XP_006569306.1| PREDICTED: BTB/POZ domain-containing adapter for CUL3-mediated RhoA degradation protein 3-like [Apis mellifera]	Cfelprot80:comp56210_c0_seq2_375_1188	Cfloprot:gi|752863681|ref|XP_011268204.1| PREDICTED: BTB/POZ domain-containing adapter for CUL3-mediated RhoA degradation protein 3 [Camponotus floridanus]	Sinvprot:gi|751203800|ref|XP_011175430.1| PREDICTED: BTB/POZ domain-containing adapter for CUL3-mediated RhoA degradation protein 3 [Solenopsis invicta]	uniprot-apis3AUP000005203:tr|A0A087ZR51|A0A087ZR51_APIME Uncharacterized protein OS=Apis mellifera GN=LOC412616 PE=4 SV=1	uniprot-cflo3AUP000000311:tr|E1ZZA3|E1ZZA3_CAMFO BTB/POZ domain-containing protein KCTD10 OS=Camponotus floridanus GN=EAG_09536 PE=4 SV=1	uniprot-sinv3AUP000006539:tr|E9ID33|E9ID33_SOLIN Putative uncharacterized protein (Fragment) OS=Solenopsis invicta GN=SINV_12151 PE=4 SV=1
OMA05873	Amelprot:gi|571500415|ref|XP_006559951.1| PREDICTED: translation initiation factor eIF-2B subunit epsilon-like [Apis mellifera]	Cfelprot80:comp67915_c0_seq1_210_2046	Cfloprot:gi|752863657|ref|XP_011268191.1| PREDICTED: translation initiation factor eIF-2B subunit epsilon [Camponotus floridanus]	Sinvprot:gi|751203834|ref|XP_011175449.1| PREDICTED: translation initiation factor eIF-2B subunit epsilon [Solenopsis invicta]	uniprot-apis3AUP000005203:tr|A0A088AFU5|A0A088AFU5_APIME Uncharacterized protein OS=Apis mellifera PE=4 SV=1	uniprot-cflo3AUP000000311:tr|E1ZZ86|E1ZZ86_CAMFO Translation initiation factor eIF-2B subunit epsilon OS=Camponotus floridanus GN=EAG_09518 PE=4 SV=1	uniprot-sinv3AUP000006539:tr|E9ID55|E9ID55_SOLIN Putative uncharacterized protein (Fragment) OS=Solenopsis invicta GN=SINV_02589 PE=4 SV=1
OMA13052	Amelprot:gi|571536203|ref|XP_392401.2| PREDICTED: LOW QUALITY PROTEIN: sorbitol dehydrogenase-like isoform 2 [Apis mellifera]	Cfelprot80:comp66041_c4_seq1_194_1238	Cfloprot:gi|752868503|ref|XP_011251326.1| PREDICTED: sorbitol dehydrogenase-like [Camponotus floridanus]	Sinvprot:gi|751203851|ref|XP_011175457.1| PREDICTED: sorbitol dehydrogenase-like [Solenopsis invicta]	uniprot-apis3AUP000005203:tr|A0A087ZU72|A0A087ZU72_APIME Uncharacterized protein OS=Apis mellifera GN=LOC408871 PE=3 SV=1	uniprot-cflo3AUP000000311:tr|E2A460|E2A460_CAMFO Sorbitol dehydrogenase OS=Camponotus floridanus GN=EAG_03998 PE=3 SV=1	uniprot-sinv3AUP000006539:tr|E9ID57|E9ID57_SOLIN Putative uncharacterized protein (Fragment) OS=Solenopsis invicta GN=SINV_08416 PE=3 SV=1
OMA16238	Amelprot:gi|571536025|ref|XP_006570626.1| PREDICTED: transcription initiation factor TFIID subunit 11 isoform X4 [Apis mellifera]	Cfelprot80:comp62810_c1_seq3_1076_1240	Cfloprot:gi|752896410|ref|XP_011266461.1| PREDICTED: transcription initiation factor TFIID subunit 11 [Camponotus floridanus]	Sinvprot:gi|751203872|ref|XP_011175468.1| PREDICTED: transcription initiation factor TFIID subunit 11 [Solenopsis invicta]	uniprot-apis3AUP000005203:tr|A0A088APG5|A0A088APG5_APIME Uncharacterized protein OS=Apis mellifera GN=Taf11 PE=4 SV=1	uniprot-cflo3AUP000000311:tr|E2AYW3|E2AYW3_CAMFO Transcription initiation factor TFIID subunit 11 OS=Camponotus floridanus GN=EAG_01367 PE=4 SV=1	uniprot-sinv3AUP000006539:tr|E9ID63|E9ID63_SOLIN Putative uncharacterized protein (Fragment) OS=Solenopsis invicta GN=SINV_05994 PE=4 SV=1
OMA19714	Amelprot:gi|328791530|ref|XP_624429.2| PREDICTED: biogenesis of lysosome-related organelles complex 1 subunit 4-like isoform X3 [Apis mellifera]	Cfelprot80:comp52798_c0_seq1_310_646	Cfloprot:gi|752896406|ref|XP_011266458.1| PREDICTED: biogenesis of lysosome-related organelles complex 1 subunit 4 [Camponotus floridanus]	Sinvprot:gi|751203874|ref|XP_011175469.1| PREDICTED: biogenesis of lysosome-related organelles complex 1 subunit 4 [Solenopsis invicta]	uniprot-apis3AUP000005203:tr|A0A088APM7|A0A088APM7_APIME Uncharacterized protein OS=Apis mellifera GN=LOC552047 PE=4 SV=1	uniprot-cflo3AUP000000311:tr|E2AYW2|E2AYW2_CAMFO Protein cappuccino-like protein OS=Camponotus floridanus GN=EAG_01366 PE=4 SV=1	uniprot-sinv3AUP000006539:tr|E9ID64|E9ID64_SOLIN Putative uncharacterized protein (Fragment) OS=Solenopsis invicta GN=SINV_04872 PE=4 SV=1
OMA06661	Amelprot:gi|110757680|ref|XP_396436.3| PREDICTED: nucleostemin 4 [Apis mellifera]	Cfelprot80:comp66410_c15_seq2_183_1856	Cfloprot:gi|752896400|ref|XP_011266455.1| PREDICTED: guanine nucleotide-binding protein-like 1 [Camponotus floridanus]	Sinvprot:gi|751203882|ref|XP_011175474.1| PREDICTED: guanine nucleotide-binding protein-like 1 [Solenopsis invicta]	uniprot-apis3AUP000005203:tr|A0A088APM6|A0A088APM6_APIME Uncharacterized protein OS=Apis mellifera GN=LOC727600 PE=4 SV=1	uniprot-cflo3AUP000000311:tr|E2AYV8|E2AYV8_CAMFO Guanine nucleotide-binding protein-like 1 OS=Camponotus floridanus GN=EAG_01362 PE=4 SV=1	uniprot-sinv3AUP000006539:tr|E9ID66|E9ID66_SOLIN Putative uncharacterized protein (Fragment) OS=Solenopsis invicta GN=SINV_13942 PE=4 SV=1
OMA01537	Amelprot:gi|571500684|ref|XP_006561558.1| PREDICTED: furin-like protease 2-like [Apis mellifera]	Cfelprot80:comp63985_c0_seq2_987_4894	Cfloprot:gi|752893272|ref|XP_011264769.1| PREDICTED: furin-like protease 2 [Camponotus floridanus]	Sinvprot:gi|751203887|ref|XP_011175476.1| PREDICTED: furin-like protease 2 isoform X1 [Solenopsis invicta]	uniprot-apis3AUP000005203:tr|A0A088AL19|A0A088AL19_APIME Uncharacterized protein OS=Apis mellifera GN=Ame.21769 PE=3 SV=1	uniprot-cflo3AUP000000311:tr|E2AVN1|E2AVN1_CAMFO Furin-like protease 2 OS=Camponotus floridanus GN=EAG_13807 PE=3 SV=1	uniprot-sinv3AUP000006539:tr|E9ID68|E9ID68_SOLIN Putative uncharacterized protein (Fragment) OS=Solenopsis invicta GN=SINV_07873 PE=3 SV=1
OMA20643	Amelprot:gi|571500813|ref|XP_006561975.1| PREDICTED: 40S ribosomal protein S17 [Apis mellifera]	Cfelprot80:comp66623_c0_seq1_69_434	Cfloprot:gi|752896397|ref|XP_011266453.1| PREDICTED: 40S ribosomal protein S17 [Camponotus floridanus]	Sinvprot:gi|751203893|ref|XP_011175479.1| PREDICTED: 40S ribosomal protein S17 [Solenopsis invicta]	uniprot-apis3AUP000005203:tr|A0A088ANM8|A0A088ANM8_APIME Uncharacterized protein OS=Apis mellifera GN=RpS17 PE=3 SV=1	uniprot-cflo3AUP000000311:tr|E2AYV2|E2AYV2_CAMFO 40S ribosomal protein S17 (Fragment) OS=Camponotus floridanus GN=EAG_15352 PE=3 SV=1	uniprot-sinv3AUP000006539:tr|E9ID71|E9ID71_SOLIN Putative uncharacterized protein (Fragment) OS=Solenopsis invicta GN=SINV_10892 PE=3 SV=1
OMA10257	Amelprot:gi|571500393|ref|XP_006559945.1| PREDICTED: forkhead box protein C1-like [Apis mellifera]	Cfelprot80:comp29312_c0_seq1_356_1162	Cfloprot:gi|752896391|ref|XP_011266450.1| PREDICTED: forkhead box protein D1 [Camponotus floridanus]	Sinvprot:gi|751203897|ref|XP_011175482.1| PREDICTED: forkhead box protein D1 [Solenopsis invicta]	uniprot-apis3AUP000005203:tr|A0A088AFX2|A0A088AFX2_APIME Uncharacterized protein OS=Apis mellifera GN=LOC100576147 PE=4 SV=1	uniprot-cflo3AUP000000311:tr|E2AYU8|E2AYU8_CAMFO Forkhead box protein C2 OS=Camponotus floridanus GN=EAG_15348 PE=4 SV=1	uniprot-sinv3AUP000006539:tr|E9ID75|E9ID75_SOLIN Putative uncharacterized protein (Fragment) OS=Solenopsis invicta GN=SINV_02922 PE=4 SV=1
OMA02642	Amelprot:gi|571500323|ref|XP_006559928.1| PREDICTED: importin-11 isoform X1 [Apis mellifera]	Cfelprot80:comp59570_c0_seq1_324_3156	Cfloprot:gi|752896363|ref|XP_011266435.1| PREDICTED: importin-11 [Camponotus floridanus]	Sinvprot:gi|751203901|ref|XP_011175484.1| PREDICTED: importin-11 [Solenopsis invicta]	uniprot-apis3AUP000005203:tr|A0A088AFX0|A0A088AFX0_APIME Uncharacterized protein OS=Apis mellifera GN=Ranbp11 PE=4 SV=1	uniprot-cflo3AUP000000311:tr|E2AYU4|E2AYU4_CAMFO Importin-11 OS=Camponotus floridanus GN=EAG_15344 PE=4 SV=1	uniprot-sinv3AUP000006539:tr|E9ID79|E9ID79_SOLIN Putative uncharacterized protein (Fragment) OS=Solenopsis invicta GN=SINV_00522 PE=4 SV=1
OMA16228	Amelprot:gi|110767080|ref|XP_001120419.1| PREDICTED: 40S ribosomal protein S6-like [Apis mellifera]	Cfelprot80:comp61722_c0_seq1_89_782	Cfloprot:gi|752896361|ref|XP_011266434.1| PREDICTED: 40S ribosomal protein S6 [Camponotus floridanus]	Sinvprot:gi|751203903|ref|XP_011175485.1| PREDICTED: 40S ribosomal protein S6 [Solenopsis invicta]	uniprot-apis3AUP000005203:tr|A0A088AFT2|A0A088AFT2_APIME 40S ribosomal protein S6 OS=Apis mellifera GN=LOC725647 PE=3 SV=1	uniprot-cflo3AUP000000311:tr|E2AYU3|E2AYU3_CAMFO 40S ribosomal protein S6 OS=Camponotus floridanus GN=EAG_15343 PE=3 SV=1	uniprot-sinv3AUP000006539:tr|E9ID80|E9ID80_SOLIN Putative uncharacterized protein (Fragment) OS=Solenopsis invicta GN=SINV_16043 PE=4 SV=1
OMA04951	Amelprot:gi|66510575|ref|XP_392939.2| PREDICTED: hemocyte protein-glutamine gamma-glutamyltransferase-like isoform X1 [Apis mellifera]	Cfelprot80:comp60958_c0_seq1_181_2284	Cfloprot:gi|752896357|ref|XP_011266432.1| PREDICTED: hemocyte protein-glutamine gamma-glutamyltransferase-like [Camponotus floridanus]	Sinvprot:gi|751203909|ref|XP_011175488.1| PREDICTED: hemocyte protein-glutamine gamma-glutamyltransferase-like [Solenopsis invicta]	uniprot-apis3AUP000005203:tr|A0A088AKR6|A0A088AKR6_APIME Uncharacterized protein OS=Apis mellifera GN=LOC409425 PE=4 SV=1	uniprot-cflo3AUP000000311:tr|E2AYU1|E2AYU1_CAMFO Hemocyte protein-glutamine gamma-glutamyltransferase OS=Camponotus floridanus GN=EAG_15341 PE=4 SV=1	uniprot-sinv3AUP000006539:tr|E9ID81|E9ID81_SOLIN Putative uncharacterized protein (Fragment) OS=Solenopsis invicta GN=SINV_07219 PE=4 SV=1
OMA10040	Amelprot:gi|571533180|ref|XP_006561338.1| PREDICTED: protein prenyltransferase alpha subunit repeat-containing protein 1-like isoform X2 [Apis mellifera]	Cfelprot80:comp45988_c0_seq1_112_1275	Cfloprot:gi|752879555|ref|XP_011257308.1| PREDICTED: protein prenyltransferase alpha subunit repeat-containing protein 1 [Camponotus floridanus]	Sinvprot:gi|751203918|ref|XP_011175492.1| PREDICTED: protein prenyltransferase alpha subunit repeat-containing protein 1 [Solenopsis invicta]	uniprot-apis3AUP000005203:tr|A0A088AKR2|A0A088AKR2_APIME Uncharacterized protein OS=Apis mellifera GN=LOC725592 PE=4 SV=1	uniprot-cflo3AUP000000311:tr|E2AFP6|E2AFP6_CAMFO Protein prenyltransferase alpha subunit repeat-containing protein 1 OS=Camponotus floridanus GN=EAG_02744 PE=4 SV=1	uniprot-sinv3AUP000006539:tr|E9ID84|E9ID84_SOLIN Putative uncharacterized protein (Fragment) OS=Solenopsis invicta GN=SINV_01460 PE=4 SV=1
OMA08118	Amelprot:gi|328780713|ref|XP_396382.3| PREDICTED: U3 small nucleolar RNA-associated protein 15 homolog [Apis mellifera]	Cfelprot80:comp52533_c0_seq2_71_1631	Cfloprot:gi|752879549|ref|XP_011257305.1| PREDICTED: U3 small nucleolar RNA-associated protein 15 homolog [Camponotus floridanus]	Sinvprot:gi|751203921|ref|XP_011175493.1| PREDICTED: U3 small nucleolar RNA-associated protein 15 homolog [Solenopsis invicta]	uniprot-apis3AUP000005203:tr|A0A088AKR1|A0A088AKR1_APIME Uncharacterized protein OS=Apis mellifera GN=LOC551639 PE=4 SV=1	uniprot-cflo3AUP000000311:tr|E2AFP3|E2AFP3_CAMFO U3 small nucleolar RNA-associated protein 15-like protein OS=Camponotus floridanus GN=EAG_02741 PE=4 SV=1	uniprot-sinv3AUP000006539:tr|E9ID85|E9ID85_SOLIN Putative uncharacterized protein (Fragment) OS=Solenopsis invicta GN=SINV_00608 PE=4 SV=1
OMA09444	Amelprot:gi|66510586|ref|XP_396383.2| PREDICTED: DDB1- and CUL4-associated factor 12-like isoform X3 [Apis mellifera]	Cfelprot80:comp61665_c0_seq1_430_1676	Cfloprot:gi|752879545|ref|XP_011257302.1| PREDICTED: DDB1- and CUL4-associated factor 12 [Camponotus floridanus]	Sinvprot:gi|751203925|ref|XP_011175495.1| PREDICTED: DDB1- and CUL4-associated factor 12 [Solenopsis invicta]	uniprot-apis3AUP000005203:tr|A0A088AKW5|A0A088AKW5_APIME Uncharacterized protein OS=Apis mellifera GN=LOC412932 PE=4 SV=1	uniprot-cflo3AUP000000311:tr|E2AFP2|E2AFP2_CAMFO WD repeat-containing protein 40A OS=Camponotus floridanus GN=EAG_02740 PE=4 SV=1	uniprot-sinv3AUP000006539:tr|E9ID87|E9ID87_SOLIN Putative uncharacterized protein (Fragment) OS=Solenopsis invicta GN=SINV_08590 PE=4 SV=1
OMA16961	Amelprot:gi|571533210|ref|XP_006561346.1| PREDICTED: tumor necrosis factor alpha-induced protein 8-like protein-like isoform X1 [Apis mellifera]	Cfelprot80:comp65170_c0_seq3_321_980	Cfloprot:gi|752879543|ref|XP_011257301.1| PREDICTED: tumor necrosis factor alpha-induced protein 8-like protein isoform X2 [Camponotus floridanus]	Sinvprot:gi|751203927|ref|XP_011175496.1| PREDICTED: tumor necrosis factor alpha-induced protein 8-like protein [Solenopsis invicta]	uniprot-apis3AUP000005203:tr|A0A088AKR0|A0A088AKR0_APIME Uncharacterized protein OS=Apis mellifera GN=LOC725570 PE=4 SV=1	uniprot-cflo3AUP000000311:tr|E2AFP1|E2AFP1_CAMFO Tumor necrosis factor, alpha-induced protein 8-like protein 3 OS=Camponotus floridanus GN=EAG_02739 PE=4 SV=1	uniprot-sinv3AUP000006539:tr|E9ID89|E9ID89_SOLIN Putative uncharacterized protein (Fragment) OS=Solenopsis invicta GN=SINV_05757 PE=4 SV=1
OMA12816	Amelprot:gi|571533207|ref|XP_006561345.1| PREDICTED: geranylgeranyl transferase type-1 subunit beta isoform X2 [Apis mellifera]	Cfelprot80:comp44710_c0_seq1_550_1486	Cfloprot:gi|752879539|ref|XP_011257299.1| PREDICTED: geranylgeranyl transferase type-1 subunit beta [Camponotus floridanus]	Sinvprot:gi|751203929|ref|XP_011175498.1| PREDICTED: geranylgeranyl transferase type-1 subunit beta [Solenopsis invicta]	uniprot-apis3AUP000005203:tr|A0A088AKQ9|A0A088AKQ9_APIME Uncharacterized protein OS=Apis mellifera GN=betaggt-I PE=4 SV=1	uniprot-cflo3AUP000000311:tr|E2AFP0|E2AFP0_CAMFO Geranylgeranyl transferase type-1 subunit beta OS=Camponotus floridanus GN=EAG_02738 PE=4 SV=1	uniprot-sinv3AUP000006539:tr|E9ID90|E9ID90_SOLIN Putative uncharacterized protein (Fragment) OS=Solenopsis invicta GN=SINV_11237 PE=4 SV=1
OMA12052	Amelprot:gi|66511007|ref|XP_624244.1| PREDICTED: adenosine kinase-like isoformX2 [Apis mellifera]	Cfelprot80:comp64079_c0_seq1_663_1320	Cfloprot:gi|752879535|ref|XP_011257297.1| PREDICTED: adenosine kinase-like [Camponotus floridanus]	Sinvprot:gi|751203931|ref|XP_011175499.1| PREDICTED: adenosine kinase [Solenopsis invicta]	uniprot-apis3AUP000005203:tr|A0A087ZRR9|A0A087ZRR9_APIME Uncharacterized protein OS=Apis mellifera GN=LOC551856 PE=4 SV=1	uniprot-cflo3AUP000000311:tr|E2AFN9|E2AFN9_CAMFO Adenosine kinase OS=Camponotus floridanus GN=EAG_02737 PE=4 SV=1	uniprot-sinv3AUP000006539:tr|E9ID91|E9ID91_SOLIN Putative uncharacterized protein (Fragment) OS=Solenopsis invicta GN=SINV_01025 PE=4 SV=1
OMA02563	Amelprot:gi|571534573|ref|XP_006565425.1| PREDICTED: N-acetyltransferase 10-like [Apis mellifera]	Cfelprot80:comp65194_c0_seq1_140_3039	Cfloprot:gi|752879533|ref|XP_011257296.1| PREDICTED: N-acetyltransferase 10 [Camponotus floridanus]	Sinvprot:gi|751203935|ref|XP_011175501.1| PREDICTED: N-acetyltransferase 10 [Solenopsis invicta]	uniprot-apis3AUP000005203:tr|A0A087ZRM5|A0A087ZRM5_APIME Uncharacterized protein OS=Apis mellifera GN=LOC724656 PE=4 SV=1	uniprot-cflo3AUP000000311:tr|E2AFN8|E2AFN8_CAMFO N-acetyltransferase 10 OS=Camponotus floridanus GN=EAG_02736 PE=4 SV=1	uniprot-sinv3AUP000006539:tr|E9ID92|E9ID92_SOLIN Putative uncharacterized protein (Fragment) OS=Solenopsis invicta GN=SINV_12928 PE=4 SV=1
OMA09025	Amelprot:gi|571534569|ref|XP_006565424.1| PREDICTED: G2/mitotic-specific cyclin-A-like [Apis mellifera]	Cfelprot80:comp46831_c0_seq1_291_1819	Cfloprot:gi|752879529|ref|XP_011257293.1| PREDICTED: cyclin-A1 [Camponotus floridanus]	Sinvprot:gi|751203939|ref|XP_011175503.1| PREDICTED: cyclin-A2 [Solenopsis invicta]	uniprot-apis3AUP000005203:tr|A0A087ZRM6|A0A087ZRM6_APIME Uncharacterized protein OS=Apis mellifera GN=LOC102656846 PE=3 SV=1	uniprot-cflo3AUP000000311:tr|E2AFN5|E2AFN5_CAMFO Cyclin-A1 OS=Camponotus floridanus GN=EAG_02733 PE=3 SV=1	uniprot-sinv3AUP000006539:tr|E9ID93|E9ID93_SOLIN Putative uncharacterized protein (Fragment) OS=Solenopsis invicta GN=SINV_80491 PE=3 SV=1
OMA03259	Amelprot:gi|328782228|ref|XP_003250108.1| PREDICTED: protein PF14_0175-like [Apis mellifera]	Cfelprot80:comp61126_c0_seq1_270_2480	Cfloprot:gi|752879514|ref|XP_011257285.1| PREDICTED: uncharacterized protein LOC105251889 [Camponotus floridanus]	Sinvprot:gi|751203951|ref|XP_011175509.1| PREDICTED: uncharacterized protein LOC105207644 [Solenopsis invicta]	uniprot-apis3AUP000005203:tr|A0A088A420|A0A088A420_APIME Uncharacterized protein OS=Apis mellifera GN=LOC100576162 PE=4 SV=1	uniprot-cflo3AUP000000311:tr|E2AFN3|E2AFN3_CAMFO Putative uncharacterized protein OS=Camponotus floridanus GN=EAG_02731 PE=4 SV=1	uniprot-sinv3AUP000006539:tr|E9ID95|E9ID95_SOLIN Putative uncharacterized protein (Fragment) OS=Solenopsis invicta GN=SINV_09749 PE=4 SV=1
OMA10691	Amelprot:gi|66535389|ref|XP_395938.2| PREDICTED: protein king tubby-like [Apis mellifera]	Cfelprot80:comp44917_c0_seq1_109_1336	Cfloprot:gi|752879516|ref|XP_011257287.1| PREDICTED: protein king tubby isoform X1 [Camponotus floridanus]	Sinvprot:gi|751203953|ref|XP_011175511.1| PREDICTED: protein king tubby isoform X1 [Solenopsis invicta]	uniprot-apis3AUP000005203:tr|A0A088A446|A0A088A446_APIME Tubby-like protein OS=Apis mellifera GN=LOC412481 PE=3 SV=1	uniprot-cflo3AUP000000311:tr|E2AFN2|E2AFN2_CAMFO Tubby-like protein OS=Camponotus floridanus GN=EAG_02730 PE=3 SV=1	uniprot-sinv3AUP000006539:tr|E9ID96|E9ID96_SOLIN Tubby-like protein (Fragment) OS=Solenopsis invicta GN=SINV_11193 PE=3 SV=1
OMA05558	Amelprot:gi|571547010|ref|XP_396039.5| PREDICTED: THO complex subunit 5 homolog isoform X2 [Apis mellifera]	Cfelprot80:comp55155_c0_seq1_132_2005	Cfloprot:gi|752863760|ref|XP_011268248.1| PREDICTED: LOW QUALITY PROTEIN: THO complex subunit 5 homolog [Camponotus floridanus]	Sinvprot:gi|751203959|ref|XP_011175514.1| PREDICTED: THO complex subunit 5 homolog [Solenopsis invicta]	uniprot-apis3AUP000005203:tr|A0A088AJP7|A0A088AJP7_APIME Uncharacterized protein OS=Apis mellifera GN=thoc5 PE=4 SV=1	uniprot-cflo3AUP000000311:tr|E1ZZE0|E1ZZE0_CAMFO THO complex subunit 5-like protein OS=Camponotus floridanus GN=EAG_11707 PE=4 SV=1	uniprot-sinv3AUP000006539:tr|E9ID99|E9ID99_SOLIN Putative uncharacterized protein (Fragment) OS=Solenopsis invicta GN=SINV_03298 PE=4 SV=1
OMA15981	Amelprot:gi|328782149|ref|XP_003250092.1| PREDICTED: survival motor neuron protein-like [Apis mellifera]	Cfelprot80:comp35442_c0_seq1_170_833	Cfloprot:gi|752871835|ref|XP_011253133.1| PREDICTED: survival motor neuron protein [Camponotus floridanus]	Sinvprot:gi|751203971|ref|XP_011175521.1| PREDICTED: survival motor neuron protein isoform X1 [Solenopsis invicta]	uniprot-apis3AUP000005203:tr|A0A088A467|A0A088A467_APIME Uncharacterized protein OS=Apis mellifera GN=LOC100577491 PE=4 SV=1	uniprot-cflo3AUP000000311:tr|E2A7Y8|E2A7Y8_CAMFO Survival motor neuron protein OS=Camponotus floridanus GN=EAG_09848 PE=4 SV=1	uniprot-sinv3AUP000006539:tr|E9IDA3|E9IDA3_SOLIN Putative uncharacterized protein (Fragment) OS=Solenopsis invicta GN=SINV_14399 PE=4 SV=1
OMA06403	Amelprot:gi|571543187|ref|XP_623492.4| PREDICTED: conserved oligomeric Golgi complex subunit 8-like [Apis mellifera]	Cfelprot80:comp46754_c0_seq2_322_2103	Cfloprot:gi|752868681|ref|XP_011251421.1| PREDICTED: LOW QUALITY PROTEIN: conserved oligomeric Golgi complex subunit 8 [Camponotus floridanus]	Sinvprot:gi|751204395|ref|XP_011175749.1| PREDICTED: conserved oligomeric Golgi complex subunit 8 [Solenopsis invicta]	uniprot-apis3AUP000005203:tr|A0A087ZNR0|A0A087ZNR0_APIME Uncharacterized protein OS=Apis mellifera GN=LOC551090 PE=4 SV=1	uniprot-cflo3AUP000000311:tr|E2A4G1|E2A4G1_CAMFO Conserved oligomeric Golgi complex subunit 8 OS=Camponotus floridanus GN=EAG_14292 PE=4 SV=1	uniprot-sinv3AUP000006539:tr|E9IDA7|E9IDA7_SOLIN Putative uncharacterized protein (Fragment) OS=Solenopsis invicta GN=SINV_07209 PE=4 SV=1
OMA07519	Amelprot:gi|66563290|ref|XP_392814.2| PREDICTED: T-complex protein 1 subunit gamma [Apis mellifera]	Cfelprot80:comp67052_c0_seq1_184_1791	Cfloprot:gi|752868685|ref|XP_011251423.1| PREDICTED: T-complex protein 1 subunit gamma isoform X1 [Camponotus floridanus]	Sinvprot:gi|751203986|ref|XP_011175529.1| PREDICTED: T-complex protein 1 subunit gamma [Solenopsis invicta]	uniprot-apis3AUP000005203:tr|A0A088A3C0|A0A088A3C0_APIME T-complex protein 1 subunit gamma OS=Apis mellifera GN=Cctgamma PE=3 SV=1	uniprot-cflo3AUP000000311:tr|E2A4G2|E2A4G2_CAMFO T-complex protein 1 subunit gamma OS=Camponotus floridanus GN=EAG_14293 PE=3 SV=1	uniprot-sinv3AUP000006539:tr|E9IDA8|E9IDA8_SOLIN T-complex protein 1 subunit gamma (Fragment) OS=Solenopsis invicta GN=SINV_09122 PE=3 SV=1
OMA03168	Amelprot:gi|571534261|ref|XP_006564208.1| PREDICTED: phosphatidylinositol 3-kinase catalytic subunit type 3-like [Apis mellifera]	Cfelprot80:comp68832_c0_seq1_274_3002	Cfloprot:gi|752898235|ref|XP_011267462.1| PREDICTED: phosphatidylinositol 3-kinase catalytic subunit type 3 [Camponotus floridanus]	Sinvprot:gi|751203988|ref|XP_011175530.1| PREDICTED: phosphatidylinositol 3-kinase catalytic subunit type 3 [Solenopsis invicta]	uniprot-apis3AUP000005203:tr|A0A088AB15|A0A088AB15_APIME Uncharacterized protein OS=Apis mellifera GN=LOC725770 PE=4 SV=1	uniprot-cflo3AUP000000311:tr|E2B101|E2B101_CAMFO Phosphatidylinositol 3-kinase OS=Camponotus floridanus GN=EAG_05355 PE=3 SV=1	uniprot-sinv3AUP000006539:tr|E9IDA9|E9IDA9_SOLIN Putative uncharacterized protein (Fragment) OS=Solenopsis invicta GN=SINV_13753 PE=4 SV=1
OMA14229	Amelprot:gi|328784136|ref|XP_395437.4| PREDICTED: G kinase-anchoring protein 1-like [Apis mellifera]	Cfelprot80:comp44921_c0_seq1_1660_2263	Cfloprot:gi|752898239|ref|XP_011267464.1| PREDICTED: G kinase-anchoring protein 1-like [Camponotus floridanus]	Sinvprot:gi|751203992|ref|XP_011175532.1| PREDICTED: G kinase-anchoring protein 1-like [Solenopsis invicta]	uniprot-apis3AUP000005203:tr|A0A088AB16|A0A088AB16_APIME Uncharacterized protein OS=Apis mellifera GN=LOC411970 PE=4 SV=1	uniprot-cflo3AUP000000311:tr|E2B103|E2B103_CAMFO G kinase-anchoring protein 1 OS=Camponotus floridanus GN=EAG_05357 PE=4 SV=1	uniprot-sinv3AUP000006539:tr|E9IDB2|E9IDB2_SOLIN Putative uncharacterized protein (Fragment) OS=Solenopsis invicta GN=SINV_05477 PE=4 SV=1
OMA12501	Amelprot:gi|571534141|ref|XP_006564183.1| PREDICTED: probable isocitrate dehydrogenase [NAD] subunit alpha, mitochondrial-like [Apis mellifera]	Cfelprot80:comp64465_c1_seq1_2775_2856	Cfloprot:gi|752898245|ref|XP_011267468.1| PREDICTED: probable isocitrate dehydrogenase [NAD] subunit alpha, mitochondrial [Camponotus floridanus]	Sinvprot:gi|751203999|ref|XP_011175536.1| PREDICTED: probable isocitrate dehydrogenase [NAD] subunit alpha, mitochondrial [Solenopsis invicta]	uniprot-apis3AUP000005203:tr|A0A088AAU7|A0A088AAU7_APIME Isocitrate dehydrogenase [NAD] subunit, mitochondrial OS=Apis mellifera GN=LOC409292 PE=3 SV=1	uniprot-cflo3AUP000000311:tr|E2B105|E2B105_CAMFO Probable isocitrate dehydrogenase [NAD] subunit alpha, mitochondrial OS=Camponotus floridanus GN=EAG_05359 PE=3 SV=1	uniprot-sinv3AUP000006539:tr|E9IDB6|E9IDB6_SOLIN Isocitrate dehydrogenase [NAD] subunit, mitochondrial (Fragment) OS=Solenopsis invicta GN=SINV_07766 PE=3 SV=1
OMA09384	Amelprot:gi|571521237|ref|XP_006569904.1| PREDICTED: glycosaminoglycan xylosylkinase-like [Apis mellifera]	Cfelprot80:comp54180_c0_seq1_106_1446	Cfloprot:gi|752881260|ref|XP_011258229.1| PREDICTED: glycosaminoglycan xylosylkinase [Camponotus floridanus]	Sinvprot:gi|751204016|ref|XP_011175543.1| PREDICTED: glycosaminoglycan xylosylkinase [Solenopsis invicta]	uniprot-apis3AUP000005203:tr|A0A088A4C4|A0A088A4C4_APIME Uncharacterized protein OS=Apis mellifera GN=LOC410911 PE=4 SV=1	uniprot-cflo3AUP000000311:tr|E2AHT1|E2AHT1_CAMFO Protein FAM20B OS=Camponotus floridanus GN=EAG_04303 PE=4 SV=1	uniprot-sinv3AUP000006539:tr|E9IDC2|E9IDC2_SOLIN Putative uncharacterized protein (Fragment) OS=Solenopsis invicta GN=SINV_09183 PE=4 SV=1
OMA13454	Amelprot:gi|571521307|ref|XP_006569915.1| PREDICTED: endonuclease G, mitochondrial-like [Apis mellifera]	Cfelprot80:comp59201_c0_seq2_361_1044	Cfloprot:gi|752881248|ref|XP_011258223.1| PREDICTED: endonuclease G, mitochondrial [Camponotus floridanus]	Sinvprot:gi|751204029|ref|XP_011175550.1| PREDICTED: endonuclease G, mitochondrial [Solenopsis invicta]	uniprot-apis3AUP000005203:tr|A0A088A4B5|A0A088A4B5_APIME Uncharacterized protein OS=Apis mellifera GN=LOC551715 PE=4 SV=1	uniprot-cflo3AUP000000311:tr|E2AHS5|E2AHS5_CAMFO Endonuclease G, mitochondrial OS=Camponotus floridanus GN=EAG_04296 PE=4 SV=1	uniprot-sinv3AUP000006539:tr|E9IDD6|E9IDD6_SOLIN Putative uncharacterized protein (Fragment) OS=Solenopsis invicta GN=SINV_02790 PE=4 SV=1
OMA09138	Amelprot:gi|328790673|ref|XP_003251445.1| PREDICTED: cell cycle checkpoint control protein RAD9A-like [Apis mellifera]	Cfelprot80:comp60281_c0_seq2_153_1139	Cfloprot:gi|752881246|ref|XP_011258222.1| PREDICTED: cell cycle checkpoint control protein RAD9A [Camponotus floridanus]	Sinvprot:gi|751204031|ref|XP_011175551.1| PREDICTED: cell cycle checkpoint control protein RAD9A [Solenopsis invicta]	uniprot-apis3AUP000005203:tr|A0A088A4B4|A0A088A4B4_APIME Uncharacterized protein OS=Apis mellifera GN=LOC100576872 PE=4 SV=1	uniprot-cflo3AUP000000311:tr|E2AHS4|E2AHS4_CAMFO Cell cycle checkpoint control protein RAD9A OS=Camponotus floridanus GN=EAG_04295 PE=4 SV=1	uniprot-sinv3AUP000006539:tr|E9IDD7|E9IDD7_SOLIN Putative uncharacterized protein (Fragment) OS=Solenopsis invicta GN=SINV_11182 PE=4 SV=1
OMA10355	Amelprot:gi|110755553|ref|XP_396131.3| PREDICTED: aspartate aminotransferase, mitochondrial isoform 1 [Apis mellifera]	Cfelprot80:comp63886_c0_seq1_167_1452	Cfloprot:gi|752881226|ref|XP_011258211.1| PREDICTED: aspartate aminotransferase, mitochondrial [Camponotus floridanus]	Sinvprot:gi|751204043|ref|XP_011175557.1| PREDICTED: aspartate aminotransferase, mitochondrial [Solenopsis invicta]	uniprot-apis3AUP000005203:tr|A0A088A4B2|A0A088A4B2_APIME Aspartate aminotransferase OS=Apis mellifera GN=Got2 PE=3 SV=1	uniprot-cflo3AUP000000311:tr|E2AHR4|E2AHR4_CAMFO Aspartate aminotransferase OS=Camponotus floridanus GN=EAG_04285 PE=3 SV=1	uniprot-sinv3AUP000006539:tr|E9IDD8|E9IDD8_SOLIN Aspartate aminotransferase (Fragment) OS=Solenopsis invicta GN=SINV_02306 PE=3 SV=1
OMA13211	Amelprot:gi|571518845|ref|XP_001121632.3| PREDICTED: THO complex subunit 6 homolog [Apis mellifera]	Cfelprot80:comp64040_c0_seq1_998_1229	Cfloprot:gi|752881228|ref|XP_011258212.1| PREDICTED: THO complex subunit 6 homolog [Camponotus floridanus]	Sinvprot:gi|751204039|ref|XP_011175555.1| PREDICTED: THO complex subunit 6 homolog [Solenopsis invicta]	uniprot-apis3AUP000005203:tr|A0A088AVT1|A0A088AVT1_APIME Uncharacterized protein OS=Apis mellifera GN=thoc6 PE=4 SV=1	uniprot-cflo3AUP000000311:tr|E2AHR5|E2AHR5_CAMFO THO complex subunit 6-like protein OS=Camponotus floridanus GN=EAG_04286 PE=4 SV=1	uniprot-sinv3AUP000006539:tr|E9IDD9|E9IDD9_SOLIN Putative uncharacterized protein (Fragment) OS=Solenopsis invicta GN=SINV_08011 PE=4 SV=1
OMA08594	Amelprot:gi|328780241|ref|XP_394433.4| PREDICTED: uncharacterized protein LOC410957 isoform X3 [Apis mellifera]	Cfelprot80:comp63838_c0_seq3_64_1086	Cfloprot:gi|752881232|ref|XP_011258214.1| PREDICTED: uncharacterized protein LOC105252517 [Camponotus floridanus]	Sinvprot:gi|751204047|ref|XP_011175559.1| PREDICTED: uncharacterized protein LOC105207682 isoform X2 [Solenopsis invicta]	uniprot-apis3AUP000005203:tr|A0A088AVI3|A0A088AVI3_APIME Uncharacterized protein OS=Apis mellifera GN=LOC410957 PE=4 SV=1	uniprot-cflo3AUP000000311:tr|E2AHR6|E2AHR6_CAMFO Putative uncharacterized protein OS=Camponotus floridanus GN=EAG_04287 PE=4 SV=1	uniprot-sinv3AUP000006539:tr|E9IDE0|E9IDE0_SOLIN Putative uncharacterized protein (Fragment) OS=Solenopsis invicta GN=SINV_12654 PE=4 SV=1
OMA04549	Amelprot:gi|328780207|ref|XP_003249766.1| PREDICTED: WD repeat-containing protein 78-like isoform X1 [Apis mellifera]	Cfelprot80:comp64126_c0_seq1_198_2401	Cfloprot:gi|752881230|ref|XP_011258213.1| PREDICTED: WD repeat-containing protein 78 [Camponotus floridanus]	Sinvprot:gi|751204045|ref|XP_011175558.1| PREDICTED: WD repeat-containing protein 78-like isoform X1 [Solenopsis invicta]	uniprot-apis3AUP000005203:tr|A0A088AVI2|A0A088AVI2_APIME Uncharacterized protein OS=Apis mellifera GN=LOC100576290 PE=4 SV=1	uniprot-cflo3AUP000000311:tr|E2AHR7|E2AHR7_CAMFO WD repeat-containing protein 78 OS=Camponotus floridanus GN=EAG_04288 PE=4 SV=1	uniprot-sinv3AUP000006539:tr|E9IDE1|E9IDE1_SOLIN Putative uncharacterized protein (Fragment) OS=Solenopsis invicta GN=SINV_80528 PE=4 SV=1
OMA07522	Amelprot:gi|571533610|ref|XP_006562529.1| PREDICTED: ubiquilin-1-like [Apis mellifera]	Cfelprot80:comp63230_c0_seq6_3532_5075	Cfloprot:gi|752890881|ref|XP_011263453.1| PREDICTED: ubiquilin-1 [Camponotus floridanus]	Sinvprot:gi|751204403|ref|XP_011175753.1| PREDICTED: ubiquilin-1, partial [Solenopsis invicta]	uniprot-apis3AUP000005203:tr|A0A088A464|A0A088A464_APIME Uncharacterized protein OS=Apis mellifera GN=LOC410054 PE=4 SV=1	uniprot-cflo3AUP000000311:tr|E2ASX1|E2ASX1_CAMFO Ubiquilin-1 OS=Camponotus floridanus GN=EAG_09135 PE=4 SV=1	uniprot-sinv3AUP000006539:tr|E9IDE6|E9IDE6_SOLIN Putative uncharacterized protein (Fragment) OS=Solenopsis invicta GN=SINV_06667 PE=4 SV=1
OMA02410	Amelprot:gi|571533590|ref|XP_006562525.1| PREDICTED: protein SMG5-like [Apis mellifera]	Cfelprot80:comp58556_c0_seq1_820_3357	Cfloprot:gi|752890879|ref|XP_011263452.1| PREDICTED: protein SMG5 [Camponotus floridanus]	Sinvprot:gi|751204071|ref|XP_011175572.1| PREDICTED: protein SMG5 [Solenopsis invicta]	uniprot-apis3AUP000005203:tr|A0A088A463|A0A088A463_APIME Uncharacterized protein OS=Apis mellifera GN=LOC727497 PE=4 SV=1	uniprot-cflo3AUP000000311:tr|E2ASX0|E2ASX0_CAMFO Protein SMG5 OS=Camponotus floridanus GN=EAG_09134 PE=4 SV=1	uniprot-sinv3AUP000006539:tr|E9IDE7|E9IDE7_SOLIN Putative uncharacterized protein (Fragment) OS=Solenopsis invicta GN=SINV_80147 PE=4 SV=1
OMA17486	Amelprot:gi|571501696|ref|XP_006563278.1| PREDICTED: 60S ribosomal protein L10a [Apis mellifera]	Cfelprot80:comp36603_c0_seq1_118_717	Cfloprot:gi|752890861|ref|XP_011263442.1| PREDICTED: 60S ribosomal protein L10a [Camponotus floridanus]	Sinvprot:gi|751204090|ref|XP_011175582.1| PREDICTED: 60S ribosomal protein L10a [Solenopsis invicta]	uniprot-apis3AUP000005203:tr|A0A087ZPU8|A0A087ZPU8_APIME Uncharacterized protein OS=Apis mellifera GN=RpL10Ab PE=4 SV=1	uniprot-cflo3AUP000000311:tr|E2ASW6|E2ASW6_CAMFO 60S ribosomal protein L10a OS=Camponotus floridanus GN=EAG_09130 PE=4 SV=1	uniprot-sinv3AUP000006539:tr|E9IDF0|E9IDF0_SOLIN Putative uncharacterized protein (Fragment) OS=Solenopsis invicta GN=SINV_08785 PE=4 SV=1
OMA07593	Amelprot:gi|571519360|ref|XP_006564016.1| PREDICTED: protein alan shepard-like isoform X11 [Apis mellifera]	Cfelprot80:comp58742_c0_seq2_1_1234	Cfloprot:gi|752869642|ref|XP_011251939.1| PREDICTED: protein alan shepard isoform X1 [Camponotus floridanus]	Sinvprot:gi|751204407|ref|XP_011175756.1| PREDICTED: protein alan shepard [Solenopsis invicta]	uniprot-apis3AUP000005203:tr|A0A088AQ05|A0A088AQ05_APIME Uncharacterized protein OS=Apis mellifera GN=LOC409893 PE=4 SV=1	uniprot-cflo3AUP000000311:tr|E2A5I6|E2A5I6_CAMFO RNA-binding motif, single-stranded-interacting protein 1 OS=Camponotus floridanus GN=EAG_14789 PE=4 SV=1	uniprot-sinv3AUP000006539:tr|E9IDF4|E9IDF4_SOLIN Putative uncharacterized protein (Fragment) OS=Solenopsis invicta GN=SINV_06805 PE=4 SV=1
OMA12946	Amelprot:gi|66564357|ref|XP_624474.1| PREDICTED: methyltransferase-like isoformX1 [Apis mellifera]	Cfelprot80:comp71000_c0_seq1_24_1162	Cfloprot:gi|752869651|ref|XP_011251943.1| PREDICTED: methyltransferase-like protein 2-A [Camponotus floridanus]	Sinvprot:gi|751204096|ref|XP_011175586.1| PREDICTED: methyltransferase-like protein 2 [Solenopsis invicta]	uniprot-apis3AUP000005203:tr|A0A088APV2|A0A088APV2_APIME Uncharacterized protein OS=Apis mellifera GN=metl PE=4 SV=1	uniprot-cflo3AUP000000311:tr|E2A5I8|E2A5I8_CAMFO Methyltransferase-like protein 2 OS=Camponotus floridanus GN=EAG_14791 PE=4 SV=1	uniprot-sinv3AUP000006539:tr|E9IDF5|E9IDF5_SOLIN Putative uncharacterized protein (Fragment) OS=Solenopsis invicta GN=SINV_80318 PE=4 SV=1
OMA04162	Amelprot:gi|328785666|ref|XP_392421.3| PREDICTED: protein groucho isoformX1 [Apis mellifera]	Cfelprot80:comp62849_c0_seq1_67_2415	Cfloprot:gi|752888390|ref|XP_011262109.1| PREDICTED: protein groucho-1-like isoform X1 [Camponotus floridanus]	Sinvprot:gi|751204098|ref|XP_011175587.1| PREDICTED: protein groucho-1-like isoform X1 [Solenopsis invicta]	uniprot-apis3AUP000005203:tr|A0A087ZRU6|A0A087ZRU6_APIME Uncharacterized protein OS=Apis mellifera GN=gro PE=4 SV=1	uniprot-cflo3AUP000000311:tr|E2AQ92|E2AQ92_CAMFO Protein groucho OS=Camponotus floridanus GN=EAG_00856 PE=4 SV=1	uniprot-sinv3AUP000006539:tr|E9IDF6|E9IDF6_SOLIN Putative uncharacterized protein (Fragment) OS=Solenopsis invicta GN=SINV_02387 PE=4 SV=1
OMA01494	Amelprot:gi|571534947|ref|XP_006565468.1| PREDICTED: large proline-rich protein BAG6 isoform X4 [Apis mellifera]	Cfelprot80:comp63467_c1_seq1_1_2768	Cfloprot:gi|752888386|ref|XP_011262107.1| PREDICTED: large proline-rich protein BAG6 [Camponotus floridanus]	Sinvprot:gi|751204108|ref|XP_011175593.1| PREDICTED: large proline-rich protein BAG6 isoform X1 [Solenopsis invicta]	uniprot-apis3AUP000005203:tr|A0A087ZRU4|A0A087ZRU4_APIME Uncharacterized protein OS=Apis mellifera GN=LOC408889 PE=4 SV=1	uniprot-cflo3AUP000000311:tr|E2AQ86|E2AQ86_CAMFO Large proline-rich protein BAT3 OS=Camponotus floridanus GN=EAG_00850 PE=4 SV=1	uniprot-sinv3AUP000006539:tr|E9IDF9|E9IDF9_SOLIN Putative uncharacterized protein (Fragment) OS=Solenopsis invicta GN=SINV_08281 PE=4 SV=1
OMA05965	Amelprot:gi|110757535|ref|XP_392419.3| PREDICTED: leucine-rich repeats and immunoglobulin-like domains protein 1-like [Apis mellifera]	Cfelprot80:comp58419_c0_seq1_784_2667	Cfloprot:gi|752888383|ref|XP_011262105.1| PREDICTED: insulin-like growth factor-binding protein complex acid labile subunit [Camponotus floridanus]	Sinvprot:gi|751204409|ref|XP_011175757.1| PREDICTED: leucine-rich repeats and immunoglobulin-like domains protein 1 [Solenopsis invicta]	uniprot-apis3AUP000005203:tr|A0A087ZRJ9|A0A087ZRJ9_APIME Uncharacterized protein OS=Apis mellifera GN=LOC408888 PE=4 SV=1	uniprot-cflo3AUP000000311:tr|E2AQ84|E2AQ84_CAMFO Leucine-rich repeats and immunoglobulin-like domains protein 3 OS=Camponotus floridanus GN=EAG_00848 PE=4 SV=1	uniprot-sinv3AUP000006539:tr|E9IDG0|E9IDG0_SOLIN Putative uncharacterized protein (Fragment) OS=Solenopsis invicta GN=SINV_15626 PE=4 SV=1
OMA05498	Amelprot:gi|58585228|ref|NP_001011643.1| GABA neurotransmitter transporter-1B [Apis mellifera]	Cfelprot80:comp59182_c0_seq4_1067_3039	Cfloprot:gi|752888375|ref|XP_011262101.1| PREDICTED: sodium- and chloride-dependent GABA transporter 1 [Camponotus floridanus]	Sinvprot:gi|751204121|ref|XP_011175599.1| PREDICTED: sodium- and chloride-dependent GABA transporter 1-like isoform X1 [Solenopsis invicta]	uniprot-apis3AUP000005203:tr|Q6TLC7|Q6TLC7_APIME Transporter OS=Apis mellifera GN=GAT-1B PE=2 SV=1	uniprot-cflo3AUP000000311:tr|E2AQ81|E2AQ81_CAMFO Transporter OS=Camponotus floridanus GN=EAG_00845 PE=3 SV=1	uniprot-sinv3AUP000006539:tr|E9IDG2|E9IDG2_SOLIN Transporter (Fragment) OS=Solenopsis invicta GN=SINV_07172 PE=3 SV=1
OMA02732	Amelprot:gi|328776866|ref|XP_397235.3| PREDICTED: methionine--tRNA ligase, cytoplasmic-like isoform 2 [Apis mellifera]	Cfelprot80:comp55870_c0_seq1_3520_3614	Cfloprot:gi|752888361|ref|XP_011262093.1| PREDICTED: methionine--tRNA ligase, cytoplasmic [Camponotus floridanus]	Sinvprot:gi|751204133|ref|XP_011175606.1| PREDICTED: methionine--tRNA ligase, cytoplasmic [Solenopsis invicta]	uniprot-apis3AUP000005203:tr|A0A088A3B9|A0A088A3B9_APIME Uncharacterized protein OS=Apis mellifera GN=LOC413796 PE=3 SV=1	uniprot-cflo3AUP000000311:tr|E2AQ76|E2AQ76_CAMFO Methionyl-tRNA synthetase, cytoplasmic OS=Camponotus floridanus GN=EAG_00840 PE=3 SV=1	uniprot-sinv3AUP000006539:tr|E9IDG4|E9IDG4_SOLIN Putative uncharacterized protein (Fragment) OS=Solenopsis invicta GN=SINV_15365 PE=4 SV=1
OMA05599	Amelprot:gi|328780265|ref|XP_394417.4| PREDICTED: protein MTO1 homolog, mitochondrial-like isoform 1 [Apis mellifera]	Cfelprot80:comp64719_c0_seq11_325_2118	Cfloprot:gi|752864410|ref|XP_011268610.1| PREDICTED: protein MTO1 homolog, mitochondrial [Camponotus floridanus]	Sinvprot:gi|751204143|ref|XP_011175612.1| PREDICTED: protein MTO1 homolog, mitochondrial [Solenopsis invicta]	uniprot-apis3AUP000005203:tr|A0A088AVP6|A0A088AVP6_APIME Uncharacterized protein OS=Apis mellifera GN=LOC410941 PE=3 SV=1	uniprot-cflo3AUP000000311:tr|E2A015|E2A015_CAMFO Protein MTO1-like protein, mitochondrial OS=Camponotus floridanus GN=EAG_10212 PE=3 SV=1	uniprot-sinv3AUP000006539:tr|E9IDG6|E9IDG6_SOLIN Putative uncharacterized protein (Fragment) OS=Solenopsis invicta GN=SINV_03566 PE=3 SV=1
OMA13200	Amelprot:gi|571578244|ref|XP_006572334.1| PREDICTED: protein will die slowly [Apis mellifera]	Cfelprot80:comp33263_c0_seq1_135_980	Cfloprot:gi|752864414|ref|XP_011268612.1| PREDICTED: protein will die slowly [Camponotus floridanus]	Sinvprot:gi|751204149|ref|XP_011175615.1| PREDICTED: protein will die slowly [Solenopsis invicta]	uniprot-apis3AUP000005203:tr|A0A088AK75|A0A088AK75_APIME Uncharacterized protein OS=Apis mellifera GN=wds PE=4 SV=1	uniprot-cflo3AUP000000311:tr|E2A016|E2A016_CAMFO Protein will die slowly OS=Camponotus floridanus GN=EAG_10213 PE=4 SV=1	uniprot-sinv3AUP000006539:tr|E9IDG7|E9IDG7_SOLIN Putative uncharacterized protein (Fragment) OS=Solenopsis invicta GN=SINV_00203 PE=4 SV=1
OMA05031	Amelprot:gi|571539727|ref|XP_392453.3| PREDICTED: protein arginine N-methyltransferase 7-like isoform X2 [Apis mellifera]	Cfelprot80:comp34791_c0_seq1_1_210	Cfloprot:gi|752883752|ref|XP_011259589.1| PREDICTED: protein arginine N-methyltransferase 7, partial [Camponotus floridanus]	Sinvprot:gi|751204166|ref|XP_011175625.1| PREDICTED: protein arginine N-methyltransferase 7 [Solenopsis invicta]	uniprot-apis3AUP000005203:tr|A0A087ZUC3|A0A087ZUC3_APIME Uncharacterized protein OS=Apis mellifera GN=LOC408925 PE=4 SV=1	uniprot-cflo3AUP000000311:tr|E2AK42|E2AK42_CAMFO Protein arginine N-methyltransferase 7 OS=Camponotus floridanus GN=EAG_00590 PE=4 SV=1	uniprot-sinv3AUP000006539:tr|E9IDH1|E9IDH1_SOLIN Putative uncharacterized protein (Fragment) OS=Solenopsis invicta GN=SINV_09473 PE=4 SV=1
OMA07331	Amelprot:gi|48100282|ref|XP_392615.1| PREDICTED: vesicular inhibitory amino acid transporter-like [Apis mellifera]	Cfelprot80:comp60064_c0_seq1_880_2476	Cfloprot:gi|752897619|ref|XP_011267125.1| PREDICTED: vesicular inhibitory amino acid transporter [Camponotus floridanus]	Sinvprot:gi|751204186|ref|XP_011175636.1| PREDICTED: vesicular inhibitory amino acid transporter [Solenopsis invicta]	uniprot-apis3AUP000005203:tr|A0A087ZP72|A0A087ZP72_APIME Uncharacterized protein OS=Apis mellifera GN=LOC409089 PE=4 SV=1	uniprot-cflo3AUP000000311:tr|E2B061|E2B061_CAMFO Vesicular inhibitory amino acid transporter OS=Camponotus floridanus GN=EAG_06029 PE=4 SV=1	uniprot-sinv3AUP000006539:tr|E9IDH3|E9IDH3_SOLIN Putative uncharacterized protein (Fragment) OS=Solenopsis invicta GN=SINV_02833 PE=4 SV=1
OMA02899	Amelprot:gi|571543564|ref|XP_001122214.3| PREDICTED: ubiquitin carboxyl-terminal hydrolase 20-like [Apis mellifera]	Cfelprot80:comp72486_c0_seq1_407_3148	Cfloprot:gi|752897625|ref|XP_011267128.1| PREDICTED: ubiquitin carboxyl-terminal hydrolase 20 [Camponotus floridanus]	Sinvprot:gi|751204188|ref|XP_011175637.1| PREDICTED: ubiquitin carboxyl-terminal hydrolase 20 [Solenopsis invicta]	uniprot-apis3AUP000005203:tr|A0A087ZP71|A0A087ZP71_APIME Ubiquitin carboxyl-terminal hydrolase OS=Apis mellifera GN=LOC726482 PE=3 SV=1	uniprot-cflo3AUP000000311:tr|E2B062|E2B062_CAMFO Ubiquitin carboxyl-terminal hydrolase 20 OS=Camponotus floridanus GN=EAG_06030 PE=4 SV=1	uniprot-sinv3AUP000006539:tr|E9IDH4|E9IDH4_SOLIN Ubiquitin carboxyl-terminal hydrolase (Fragment) OS=Solenopsis invicta GN=SINV_03789 PE=3 SV=1
OMA12971	Amelprot:gi|571543561|ref|XP_006559736.1| PREDICTED: eukaryotic translation initiation factor 2 subunit 1-like [Apis mellifera]	Cfelprot80:comp36411_c0_seq2_198_1167	Cfloprot:gi|752897627|ref|XP_011267129.1| PREDICTED: eukaryotic translation initiation factor 2 subunit 1 isoform X1 [Camponotus floridanus]	Sinvprot:gi|751204190|ref|XP_011175638.1| PREDICTED: eukaryotic translation initiation factor 2 subunit 1 [Solenopsis invicta]	uniprot-apis3AUP000005203:tr|A0A087ZNQ6|A0A087ZNQ6_APIME Uncharacterized protein OS=Apis mellifera PE=4 SV=1	uniprot-cflo3AUP000000311:tr|E2B063|E2B063_CAMFO Eukaryotic translation initiation factor 2 subunit 1 OS=Camponotus floridanus GN=EAG_06031 PE=4 SV=1	uniprot-sinv3AUP000006539:tr|E9IDH5|E9IDH5_SOLIN Putative uncharacterized protein (Fragment) OS=Solenopsis invicta GN=SINV_04235 PE=4 SV=1
OMA04760	Amelprot:gi|571500188|ref|XP_006559903.1| PREDICTED: glutathione synthetase isoform X1 [Apis mellifera]	Cfelprot80:comp65524_c0_seq13_169_2366	Cfloprot:gi|752897635|ref|XP_011267134.1| PREDICTED: glutathione synthetase-like [Camponotus floridanus]	Sinvprot:gi|751204194|ref|XP_011175640.1| PREDICTED: glutathione synthetase-like [Solenopsis invicta]	uniprot-apis3AUP000005203:tr|A0A088AFV1|A0A088AFV1_APIME Uncharacterized protein OS=Apis mellifera GN=LOC412610 PE=4 SV=1	uniprot-cflo3AUP000000311:tr|E2B066|E2B066_CAMFO Glutathione synthetase OS=Camponotus floridanus GN=EAG_06034 PE=4 SV=1	uniprot-sinv3AUP000006539:tr|E9IDH8|E9IDH8_SOLIN Putative uncharacterized protein (Fragment) OS=Solenopsis invicta GN=SINV_09543 PE=4 SV=1
OMA08975	Amelprot:gi|571536079|ref|XP_006570730.1| PREDICTED: serine--tRNA ligase, mitochondrial-like [Apis mellifera]	Cfelprot80:comp58378_c0_seq1_820_2204	Cfloprot:gi|752897633|ref|XP_011267133.1| PREDICTED: uncharacterized protein LOC105257901 [Camponotus floridanus]	Sinvprot:gi|751204196|ref|XP_011175641.1| PREDICTED: serine--tRNA ligase, mitochondrial [Solenopsis invicta]	uniprot-apis3AUP000005203:tr|A0A087ZU55|A0A087ZU55_APIME Uncharacterized protein OS=Apis mellifera GN=LOC102655284 PE=4 SV=1	uniprot-cflo3AUP000000311:tr|E2B067|E2B067_CAMFO Seryl-tRNA synthetase, mitochondrial OS=Camponotus floridanus GN=EAG_06035 PE=3 SV=1	uniprot-sinv3AUP000006539:tr|E9IDH9|E9IDH9_SOLIN Putative uncharacterized protein (Fragment) OS=Solenopsis invicta GN=SINV_04645 PE=3 SV=1
OMA00536	Amelprot:gi|571536068|ref|XP_006570727.1| PREDICTED: AT-rich interactive domain-containing protein 2 isoform X1 [Apis mellifera]	Cfelprot80:comp58754_c0_seq2_1_3649	Cfloprot:gi|752897643|ref|XP_011267138.1| PREDICTED: AT-rich interactive domain-containing protein 2 isoform X2 [Camponotus floridanus]	Sinvprot:gi|751204200|ref|XP_011175644.1| PREDICTED: AT-rich interactive domain-containing protein 2 isoform X2 [Solenopsis invicta]	uniprot-apis3AUP000005203:tr|A0A087ZU48|A0A087ZU48_APIME Uncharacterized protein OS=Apis mellifera GN=LOC100577227 PE=4 SV=1	uniprot-cflo3AUP000000311:tr|E2B071|E2B071_CAMFO AT-rich interactive domain-containing protein 2 (Fragment) OS=Camponotus floridanus GN=EAG_06039 PE=4 SV=1	uniprot-sinv3AUP000006539:tr|E9IDI2|E9IDI2_SOLIN Putative uncharacterized protein (Fragment) OS=Solenopsis invicta GN=SINV_06105 PE=4 SV=1
OMA08844	Amelprot:gi|571536964|ref|XP_006571018.1| PREDICTED: uncharacterized protein LOC552058 isoform X2 [Apis mellifera]	Cfelprot80:comp65185_c0_seq4_382_1782	Cfloprot:gi|752897653|ref|XP_011267143.1| PREDICTED: uncharacterized protein LOC105257907 [Camponotus floridanus]	Sinvprot:gi|751204210|ref|XP_011175649.1| PREDICTED: uncharacterized protein LOC105207731 isoform X1 [Solenopsis invicta]	uniprot-apis3AUP000005203:tr|A0A088A251|A0A088A251_APIME Uncharacterized protein OS=Apis mellifera GN=LOC552058 PE=4 SV=1	uniprot-cflo3AUP000000311:tr|E2B073|E2B073_CAMFO Putative uncharacterized protein OS=Camponotus floridanus GN=EAG_06041 PE=4 SV=1	uniprot-sinv3AUP000006539:tr|E9IDI3|E9IDI3_SOLIN Putative uncharacterized protein (Fragment) OS=Solenopsis invicta GN=SINV_08038 PE=4 SV=1
OMA02858	Amelprot:gi|328782203|ref|XP_003250103.1| PREDICTED: Hermansky-Pudlak syndrome 5 protein homolog isoform X1 [Apis mellifera]	Cfelprot80:comp59604_c0_seq1_56_2818	Cfloprot:gi|752879379|ref|XP_011257214.1| PREDICTED: Hermansky-Pudlak syndrome 5 protein homolog [Camponotus floridanus]	Sinvprot:gi|751204230|ref|XP_011175660.1| PREDICTED: Hermansky-Pudlak syndrome 5 protein homolog [Solenopsis invicta]	uniprot-apis3AUP000005203:tr|A0A088A459|A0A088A459_APIME Uncharacterized protein OS=Apis mellifera GN=LOC100578602 PE=4 SV=1	uniprot-cflo3AUP000000311:tr|E2AFK3|E2AFK3_CAMFO Hermansky-Pudlak syndrome 5 protein-like protein OS=Camponotus floridanus GN=EAG_02701 PE=4 SV=1	uniprot-sinv3AUP000006539:tr|E9IDI6|E9IDI6_SOLIN Putative uncharacterized protein (Fragment) OS=Solenopsis invicta GN=SINV_12807 PE=4 SV=1
OMA07752	Amelprot:gi|571533529|ref|XP_397170.3| PREDICTED: probable cytochrome P450 301a1, mitochondrial [Apis mellifera]	Cfelprot80:comp63124_c0_seq1_151_1736	Cfloprot:gi|752879375|ref|XP_011257212.1| PREDICTED: probable cytochrome P450 301a1, mitochondrial isoform X1 [Camponotus floridanus]	Sinvprot:gi|751204417|ref|XP_011175761.1| PREDICTED: probable cytochrome P450 301a1, mitochondrial [Solenopsis invicta]	uniprot-apis3AUP000005203:tr|A0A088A413|A0A088A413_APIME Uncharacterized protein OS=Apis mellifera GN=CYP301A1 PE=3 SV=1	uniprot-cflo3AUP000000311:tr|E2AFK2|E2AFK2_CAMFO Probable cytochrome P450 301a1, mitochondrial OS=Camponotus floridanus GN=EAG_02700 PE=3 SV=1	uniprot-sinv3AUP000006539:tr|E9IDI7|E9IDI7_SOLIN Putative uncharacterized protein (Fragment) OS=Solenopsis invicta GN=SINV_02182 PE=3 SV=1
OMA08066	Amelprot:gi|571533837|ref|XP_006562546.1| PREDICTED: probable cytochrome P450 49a1 [Apis mellifera]	Cfelprot80:comp62750_c0_seq1_355_1893	Cfloprot:gi|752879371|ref|XP_011257209.1| PREDICTED: probable cytochrome P450 49a1 [Camponotus floridanus]	Sinvprot:gi|751204232|ref|XP_011175661.1| PREDICTED: probable cytochrome P450 49a1 isoform X1 [Solenopsis invicta]	uniprot-apis3AUP000005203:tr|A0A088A457|A0A088A457_APIME Uncharacterized protein OS=Apis mellifera GN=CYP49A1 PE=3 SV=1	uniprot-cflo3AUP000000311:tr|E2AFK1|E2AFK1_CAMFO Probable cytochrome P450 49a1 OS=Camponotus floridanus GN=EAG_02699 PE=3 SV=1	uniprot-sinv3AUP000006539:tr|E9IDI8|E9IDI8_SOLIN Putative uncharacterized protein (Fragment) OS=Solenopsis invicta GN=SINV_09914 PE=3 SV=1
OMA00465	Amelprot:gi|571533503|ref|XP_003250102.2| PREDICTED: transmembrane protein 131-like [Apis mellifera]	Cfelprot80:comp46217_c0_seq1_3_4771	Cfloprot:gi|752879365|ref|XP_011257206.1| PREDICTED: transmembrane protein 131 isoform X2 [Camponotus floridanus]	Sinvprot:gi|751204240|ref|XP_011175666.1| PREDICTED: transmembrane protein 131 [Solenopsis invicta]	uniprot-apis3AUP000005203:tr|A0A088A414|A0A088A414_APIME Uncharacterized protein OS=Apis mellifera GN=LOC100578433 PE=4 SV=1	uniprot-cflo3AUP000000311:tr|E2AFJ9|E2AFJ9_CAMFO Transmembrane protein 131 OS=Camponotus floridanus GN=EAG_02697 PE=4 SV=1	uniprot-sinv3AUP000006539:tr|E9IDJ0|E9IDJ0_SOLIN Putative uncharacterized protein (Fragment) OS=Solenopsis invicta GN=SINV_12735 PE=4 SV=1
OMA13567	Amelprot:gi|66551405|ref|XP_396624.2| PREDICTED: THO complex subunit 3-like [Apis mellifera]	Cfelprot80:comp46377_c0_seq1_146_1090	Cfloprot:gi|752879357|ref|XP_011257202.1| PREDICTED: THO complex subunit 3 [Camponotus floridanus]	Sinvprot:gi|751204244|ref|XP_011175668.1| PREDICTED: THO complex subunit 3 [Solenopsis invicta]	uniprot-apis3AUP000005203:tr|A0A088A454|A0A088A454_APIME Uncharacterized protein OS=Apis mellifera GN=LOC413173 PE=4 SV=1	uniprot-cflo3AUP000000311:tr|E2AFJ7|E2AFJ7_CAMFO THO complex subunit 3 OS=Camponotus floridanus GN=EAG_02695 PE=4 SV=1	uniprot-sinv3AUP000006539:tr|E9IDJ1|E9IDJ1_SOLIN Putative uncharacterized protein (Fragment) OS=Solenopsis invicta GN=SINV_05616 PE=4 SV=1
OMA08574	Amelprot:gi|571577775|ref|XP_006572172.1| PREDICTED: probable 26S proteasome non-ATPase regulatory subunit 3 isoform X1 [Apis mellifera]	Cfelprot80:comp36054_c0_seq1_188_1694	Cfloprot:gi|752879355|ref|XP_011257200.1| PREDICTED: probable 26S proteasome non-ATPase regulatory subunit 3 [Camponotus floridanus]	Sinvprot:gi|751204246|ref|XP_011175669.1| PREDICTED: probable 26S proteasome non-ATPase regulatory subunit 3 [Solenopsis invicta]	uniprot-apis3AUP000005203:tr|A0A088ASB8|A0A088ASB8_APIME Uncharacterized protein OS=Apis mellifera GN=Rpn3 PE=4 SV=1	uniprot-cflo3AUP000000311:tr|E2AFJ6|E2AFJ6_CAMFO Probable 26S proteasome non-ATPase regulatory subunit 3 OS=Camponotus floridanus GN=EAG_02694 PE=4 SV=1	uniprot-sinv3AUP000006539:tr|E9IDJ2|E9IDJ2_SOLIN Putative uncharacterized protein (Fragment) OS=Solenopsis invicta GN=SINV_02611 PE=4 SV=1
OMA04724	Amelprot:gi|571548223|ref|XP_006561630.1| PREDICTED: la-related protein 4-like isoform X1 [Apis mellifera]	Cfelprot80:comp64979_c0_seq1_90_1970	Cfloprot:gi|752879341|ref|XP_011257193.1| PREDICTED: la-related protein CG11505 isoform X1 [Camponotus floridanus]	Sinvprot:gi|751204260|ref|XP_011175677.1| PREDICTED: la-related protein CG11505 isoform X3 [Solenopsis invicta]	uniprot-apis3AUP000005203:tr|A0A087ZV67|A0A087ZV67_APIME Uncharacterized protein OS=Apis mellifera GN=LOC411476 PE=4 SV=1	uniprot-cflo3AUP000000311:tr|E2AFJ4|E2AFJ4_CAMFO La-related protein 4 OS=Camponotus floridanus GN=EAG_02692 PE=4 SV=1	uniprot-sinv3AUP000006539:tr|E9IDJ3|E9IDJ3_SOLIN Putative uncharacterized protein (Fragment) OS=Solenopsis invicta GN=SINV_07518 PE=4 SV=1
OMA10061	Amelprot:gi|328783893|ref|XP_396848.3| PREDICTED: ribosome biogenesis protein WDR12 homolog isoform X2 [Apis mellifera]	Cfelprot80:comp63885_c1_seq1_153_1423	Cfloprot:gi|752869640|ref|XP_011251938.1| PREDICTED: ribosome biogenesis protein WDR12 homolog [Camponotus floridanus]	Sinvprot:gi|751204268|ref|XP_011175681.1| PREDICTED: ribosome biogenesis protein WDR12 homolog isoform X3 [Solenopsis invicta]	uniprot-apis3AUP000005203:tr|A0A088APV0|A0A088APV0_APIME Ribosome biogenesis protein WDR12 homolog OS=Apis mellifera GN=LOC413404 PE=3 SV=1	uniprot-cflo3AUP000000311:tr|E2A5I5|E2A5I5_CAMFO Ribosome biogenesis protein WDR12 homolog OS=Camponotus floridanus GN=EAG_14788 PE=3 SV=1	uniprot-sinv3AUP000006539:tr|E9IDJ5|E9IDJ5_SOLIN Putative uncharacterized protein (Fragment) OS=Solenopsis invicta GN=SINV_04859 PE=3 SV=1
OMA03420	Amelprot:gi|328791962|ref|XP_001121570.2| PREDICTED: inner centromere protein [Apis mellifera]	Cfelprot80:comp46567_c0_seq1_203_2642	Cfloprot:gi|752863750|ref|XP_011268243.1| PREDICTED: inner centromere protein-like [Camponotus floridanus]	Sinvprot:gi|751204272|ref|XP_011175683.1| PREDICTED: reticulocyte-binding protein 2 homolog a isoform X2 [Solenopsis invicta]	uniprot-apis3AUP000005203:tr|A0A088A253|A0A088A253_APIME Uncharacterized protein OS=Apis mellifera GN=Incenp PE=4 SV=1	uniprot-cflo3AUP000000311:tr|E1ZZD8|E1ZZD8_CAMFO Putative uncharacterized protein OS=Camponotus floridanus GN=EAG_11705 PE=4 SV=1	uniprot-sinv3AUP000006539:tr|E9IDJ6|E9IDJ6_SOLIN Putative uncharacterized protein (Fragment) OS=Solenopsis invicta GN=SINV_09269 PE=4 SV=1
OMA12626	Amelprot:gi|110764250|ref|XP_394850.3| PREDICTED: estrogen sulfotransferase-like [Apis mellifera]	Cfelprot80:comp62912_c0_seq11_280_1196	Cfloprot:gi|752881244|ref|XP_011258221.1| PREDICTED: sulfotransferase 1C4-like [Camponotus floridanus]	Sinvprot:gi|751204282|ref|XP_011175689.1| PREDICTED: sulfotransferase 1C4-like [Solenopsis invicta]	uniprot-apis3AUP000005203:tr|A0A088AQ03|A0A088AQ03_APIME Uncharacterized protein OS=Apis mellifera GN=LOC411376 PE=4 SV=1	uniprot-cflo3AUP000000311:tr|E2AHR9|E2AHR9_CAMFO Sulfotransferase 1C4 OS=Camponotus floridanus GN=EAG_04290 PE=4 SV=1	uniprot-sinv3AUP000006539:tr|E9IDK2|E9IDK2_SOLIN Putative uncharacterized protein (Fragment) OS=Solenopsis invicta GN=SINV_06884 PE=4 SV=1
OMA08505	Amelprot:gi|328791955|ref|XP_001120478.2| PREDICTED: uncharacterized protein LOC725813 [Apis mellifera]	Cfelprot80:comp45138_c0_seq1_1_190	Cfloprot:gi|752882124|ref|XP_011258695.1| PREDICTED: uncharacterized protein LOC105252810 [Camponotus floridanus]	Sinvprot:gi|751204278|ref|XP_011175687.1| PREDICTED: uncharacterized protein LOC105207750 [Solenopsis invicta]	uniprot-apis3AUP000005203:tr|A0A088A256|A0A088A256_APIME Uncharacterized protein OS=Apis mellifera GN=Cda4 PE=4 SV=1	uniprot-cflo3AUP000000311:tr|E2AIL9|E2AIL9_CAMFO Putative uncharacterized protein OS=Camponotus floridanus GN=EAG_00698 PE=4 SV=1	uniprot-sinv3AUP000006539:tr|E9IDK3|E9IDK3_SOLIN Putative uncharacterized protein (Fragment) OS=Solenopsis invicta GN=SINV_01816 PE=4 SV=1
OMA13340	Amelprot:gi|66564768|ref|XP_624693.1| PREDICTED: autophagy 1 [Apis mellifera]	Cfelprot80:comp46221_c0_seq1_282_1108	Cfloprot:gi|752882138|ref|XP_011258703.1| PREDICTED: ubiquitin-like-conjugating enzyme ATG3 [Camponotus floridanus]	Sinvprot:gi|751204306|ref|XP_011175703.1| PREDICTED: ubiquitin-like-conjugating enzyme ATG3 [Solenopsis invicta]	uniprot-apis3AUP000005203:tr|A0A088ATD1|A0A088ATD1_APIME Autophagy-related protein 3 OS=Apis mellifera GN=Aut1 PE=3 SV=1	uniprot-cflo3AUP000000311:tr|E2AIM5|E2AIM5_CAMFO Autophagy-related protein 3 OS=Camponotus floridanus GN=EAG_00704 PE=3 SV=1	uniprot-sinv3AUP000006539:tr|E9IDK9|E9IDK9_SOLIN Autophagy-related protein 3 (Fragment) OS=Solenopsis invicta GN=SINV_08301 PE=3 SV=1
OMA04739	Amelprot:gi|571540463|ref|XP_006568396.1| PREDICTED: sodium-dependent neutral amino acid transporter B(0)AT2 isoform X1 [Apis mellifera]	Cfelprot80:comp60856_c1_seq1_1026_3099	Cfloprot:gi|752882142|ref|XP_011258705.1| PREDICTED: sodium-dependent neutral amino acid transporter B(0)AT3 isoform X2 [Camponotus floridanus]	Sinvprot:gi|751204308|ref|XP_011175704.1| PREDICTED: sodium-dependent neutral amino acid transporter B(0)AT3 [Solenopsis invicta]	uniprot-apis3AUP000005203:tr|A0A087ZZD7|A0A087ZZD7_APIME Transporter OS=Apis mellifera GN=NT-6 PE=3 SV=1	uniprot-cflo3AUP000000311:tr|E2AIM7|E2AIM7_CAMFO Transporter OS=Camponotus floridanus GN=EAG_00706 PE=3 SV=1	uniprot-sinv3AUP000006539:tr|E9IDL1|E9IDL1_SOLIN Transporter (Fragment) OS=Solenopsis invicta GN=SINV_09938 PE=3 SV=1
OMA14487	Amelprot:gi|571556634|ref|XP_006557521.1| PREDICTED: E3 ubiquitin-protein ligase CHIP-like isoform X2 [Apis mellifera]	Cfelprot80:comp33433_c0_seq1_159_995	Cfloprot:gi|752882144|ref|XP_011258707.1| PREDICTED: E3 ubiquitin-protein ligase CHIP [Camponotus floridanus]	Sinvprot:gi|751204314|ref|XP_011175706.1| PREDICTED: E3 ubiquitin-protein ligase CHIP [Solenopsis invicta]	uniprot-apis3AUP000005203:tr|A0A088A5M4|A0A088A5M4_APIME Uncharacterized protein OS=Apis mellifera GN=LOC551229 PE=4 SV=1	uniprot-cflo3AUP000000311:tr|E2AIM8|E2AIM8_CAMFO STIP1-like proteiny and U box-containing protein 1 OS=Camponotus floridanus GN=EAG_00707 PE=4 SV=1	uniprot-sinv3AUP000006539:tr|E9IDL2|E9IDL2_SOLIN Putative uncharacterized protein (Fragment) OS=Solenopsis invicta GN=SINV_01387 PE=4 SV=1
OMA13401	Amelprot:gi|328791906|ref|XP_001120877.2| PREDICTED: partitioning defective 6 homolog beta [Apis mellifera]	Cfelprot80:comp27927_c0_seq1_1_1118	Cfloprot:gi|752882154|ref|XP_011258711.1| PREDICTED: partitioning defective 6 homolog gamma isoform X1 [Camponotus floridanus]	Sinvprot:gi|751204320|ref|XP_011175709.1| PREDICTED: partitioning defective 6 homolog gamma [Solenopsis invicta]	uniprot-apis3AUP000005203:tr|A0A088A2G7|A0A088A2G7_APIME Uncharacterized protein OS=Apis mellifera GN=par-6 PE=4 SV=1	uniprot-cflo3AUP000000311:tr|E2AIN3|E2AIN3_CAMFO Partitioning defective 6-like protein gamma OS=Camponotus floridanus GN=EAG_00712 PE=4 SV=1	uniprot-sinv3AUP000006539:tr|E9IDM2|E9IDM2_SOLIN Putative uncharacterized protein (Fragment) OS=Solenopsis invicta GN=SINV_12179 PE=4 SV=1
OMA05422	Amelprot:gi|328780902|ref|XP_001120720.2| PREDICTED: mitotic spindle assembly checkpoint protein MAD1 [Apis mellifera]	Cfelprot80:comp63801_c0_seq1_110_2134	Cfloprot:gi|752882158|ref|XP_011258714.1| PREDICTED: mitotic spindle assembly checkpoint protein MAD1 [Camponotus floridanus]	Sinvprot:gi|751204322|ref|XP_011175711.1| PREDICTED: mitotic spindle assembly checkpoint protein MAD1 [Solenopsis invicta]	uniprot-apis3AUP000005203:tr|A0A088AS73|A0A088AS73_APIME Uncharacterized protein OS=Apis mellifera GN=TXBP181-like PE=4 SV=1	uniprot-cflo3AUP000000311:tr|E2AIN4|E2AIN4_CAMFO Mitotic spindle assembly checkpoint protein MAD1 OS=Camponotus floridanus GN=EAG_00713 PE=4 SV=1	uniprot-sinv3AUP000006539:tr|E9IDM3|E9IDM3_SOLIN Putative uncharacterized protein (Fragment) OS=Solenopsis invicta GN=SINV_10916 PE=4 SV=1
OMA03920	Amelprot:gi|328783099|ref|XP_393033.4| PREDICTED: TBC domain-containing protein kinase-like protein-like isoform X4 [Apis mellifera]	Cfelprot80:comp44984_c0_seq1_1812_2542	Cfloprot:gi|752893407|ref|XP_011264841.1| PREDICTED: TBC domain-containing protein kinase-like protein isoform X2 [Camponotus floridanus]	Sinvprot:gi|751204330|ref|XP_011175715.1| PREDICTED: TBC domain-containing protein kinase-like protein isoform X2 [Solenopsis invicta]	uniprot-apis3AUP000005203:tr|A0A087ZPX1|A0A087ZPX1_APIME Uncharacterized protein OS=Apis mellifera GN=LOC409527 PE=4 SV=1	uniprot-cflo3AUP000000311:tr|E2AVT0|E2AVT0_CAMFO TBC domain-containing protein kinase-like protein OS=Camponotus floridanus GN=EAG_01542 PE=4 SV=1	uniprot-sinv3AUP000006539:tr|E9IDM7|E9IDM7_SOLIN Putative uncharacterized protein (Fragment) OS=Solenopsis invicta GN=SINV_12477 PE=4 SV=1
OMA01905	Amelprot:gi|328776859|ref|XP_003249231.1| PREDICTED: death-associated protein kinase 1-like isoformX1 [Apis mellifera]	Cfelprot80:comp60028_c0_seq2_1_3512	Cfloprot:gi|752860499|ref|XP_011252194.1| PREDICTED: LOW QUALITY PROTEIN: death-associated protein kinase 1-like [Camponotus floridanus]	Sinvprot:gi|751204349|ref|XP_011175722.1| PREDICTED: death-associated protein kinase 1-like isoform X1 [Solenopsis invicta]	uniprot-apis3AUP000005203:tr|A0A088A3C1|A0A088A3C1_APIME Uncharacterized protein OS=Apis mellifera GN=LOC411980 PE=4 SV=1	uniprot-cflo3AUP000000311:tr|E1ZVV1|E1ZVV1_CAMFO Death-associated protein kinase 1 OS=Camponotus floridanus GN=EAG_02399 PE=4 SV=1	uniprot-sinv3AUP000006539:tr|E9IDN5|E9IDN5_SOLIN Putative uncharacterized protein (Fragment) OS=Solenopsis invicta GN=SINV_07976 PE=4 SV=1
OMA11694	Amelprot:gi|571518363|ref|XP_006560935.1| PREDICTED: protein-tyrosine sulfotransferase isoform X3 [Apis mellifera]	Cfelprot80:comp66118_c0_seq5_360_1504	Cfloprot:gi|752869653|ref|XP_011251944.1| PREDICTED: protein-tyrosine sulfotransferase [Camponotus floridanus]	Sinvprot:gi|751204359|ref|XP_011175728.1| PREDICTED: protein-tyrosine sulfotransferase isoform X2 [Solenopsis invicta]	uniprot-apis3AUP000005203:tr|A0A088AVM2|A0A088AVM2_APIME Uncharacterized protein OS=Apis mellifera GN=Tango13 PE=4 SV=1	uniprot-cflo3AUP000000311:tr|E2A5I9|E2A5I9_CAMFO Protein-tyrosine sulfotransferase OS=Camponotus floridanus GN=EAG_14792 PE=4 SV=1	uniprot-sinv3AUP000006539:tr|E9IDN7|E9IDN7_SOLIN Putative uncharacterized protein (Fragment) OS=Solenopsis invicta GN=SINV_13940 PE=4 SV=1
OMA09902	Amelprot:gi|571577127|ref|XP_006571953.1| PREDICTED: CAAX prenyl protease 1 homolog isoform X2 [Apis mellifera]	Cfelprot80:comp38992_c0_seq1_527_1421	Cfloprot:gi|752891336|ref|XP_011263701.1| PREDICTED: CAAX prenyl protease 1 homolog [Camponotus floridanus]	Sinvprot:gi|751204489|ref|XP_011175799.1| PREDICTED: CAAX prenyl protease 1 homolog [Solenopsis invicta]	uniprot-apis3AUP000005203:tr|A0A087ZQ49|A0A087ZQ49_APIME Uncharacterized protein OS=Apis mellifera GN=LOC551466 PE=4 SV=1	uniprot-cflo3AUP000000311:tr|E2ATI6|E2ATI6_CAMFO CAAX prenyl protease 1-like protein OS=Camponotus floridanus GN=EAG_07868 PE=4 SV=1	uniprot-sinv3AUP000006539:tr|E9IDS0|E9IDS0_SOLIN Putative uncharacterized protein (Fragment) OS=Solenopsis invicta GN=SINV_07351 PE=3 SV=1
OMA11034	Amelprot:gi|48096676|ref|XP_392498.1| PREDICTED: aminoacylase-1-like [Apis mellifera]	Cfelprot80:comp64362_c0_seq1_216_1277	Cfloprot:gi|752886291|ref|XP_011260966.1| PREDICTED: aminoacylase-1-like [Camponotus floridanus]	Sinvprot:gi|751204497|ref|XP_011175804.1| PREDICTED: aminoacylase-1 [Solenopsis invicta]	uniprot-apis3AUP000005203:tr|A0A087ZSU7|A0A087ZSU7_APIME Aminoacylase-1 OS=Apis mellifera GN=LOC408969 PE=3 SV=1	uniprot-cflo3AUP000000311:tr|E2AMU9|E2AMU9_CAMFO Aminoacylase-1 OS=Camponotus floridanus GN=EAG_01848 PE=3 SV=1	uniprot-sinv3AUP000006539:tr|E9IDS2|E9IDS2_SOLIN Putative uncharacterized protein (Fragment) OS=Solenopsis invicta GN=SINV_00964 PE=4 SV=1
OMA09184	Amelprot:gi|571545167|ref|XP_006564672.1| PREDICTED: protein transport protein Sec61 subunit alpha isoform 2 [Apis mellifera]	Cfelprot80:comp58681_c2_seq5_71_256	Cfloprot:gi|752880469|ref|XP_011257803.1| PREDICTED: protein transport protein Sec61 subunit alpha isoform 2 [Camponotus floridanus]	Sinvprot:gi|751204507|ref|XP_011175809.1| PREDICTED: protein transport protein Sec61 subunit alpha isoform 2 [Solenopsis invicta]	uniprot-apis3AUP000005203:tr|A0A087ZSU4|A0A087ZSU4_APIME Uncharacterized protein OS=Apis mellifera GN=Sec61alpha PE=3 SV=1	uniprot-cflo3AUP000000311:tr|E2AGQ1|E2AGQ1_CAMFO Protein transport protein Sec61 subunit alpha isoform 2 OS=Camponotus floridanus GN=EAG_00891 PE=3 SV=1	uniprot-sinv3AUP000006539:tr|E9IDS7|E9IDS7_SOLIN Putative uncharacterized protein (Fragment) OS=Solenopsis invicta GN=SINV_02195 PE=3 SV=1
OMA01037	Amelprot:gi|571545138|ref|XP_006564666.1| PREDICTED: nuclear pore complex protein Nup160 homolog, partial [Apis mellifera]	Cfelprot80:comp65842_c1_seq3_856_3767	Cfloprot:gi|752860435|ref|XP_011251856.1| PREDICTED: nuclear pore complex protein Nup160 homolog [Camponotus floridanus]	Sinvprot:gi|751204509|ref|XP_011175810.1| PREDICTED: nuclear pore complex protein Nup160 homolog [Solenopsis invicta]	uniprot-apis3AUP000005203:tr|A0A087ZSU1|A0A087ZSU1_APIME Uncharacterized protein OS=Apis mellifera GN=LOC725332 PE=4 SV=1	uniprot-cflo3AUP000000311:tr|E1ZVT2|E1ZVT2_CAMFO Nuclear pore complex protein Nup160-like protein OS=Camponotus floridanus GN=EAG_02909 PE=4 SV=1	uniprot-sinv3AUP000006539:tr|E9IDT0|E9IDT0_SOLIN Putative uncharacterized protein (Fragment) OS=Solenopsis invicta GN=SINV_15254 PE=4 SV=1
OMA02556	Amelprot:gi|571545625|ref|XP_006564760.1| PREDICTED: LOW QUALITY PROTEIN: glycine dehydrogenase [decarboxylating], mitochondrial-like [Apis mellifera]	Cfelprot80:comp62110_c0_seq1_73_2982	Cfloprot:gi|752860423|ref|XP_011251794.1| PREDICTED: glycine dehydrogenase (decarboxylating), mitochondrial [Camponotus floridanus]	Sinvprot:gi|751204547|ref|XP_011175829.1| PREDICTED: glycine dehydrogenase (decarboxylating), mitochondrial [Solenopsis invicta]	uniprot-apis3AUP000005203:tr|A0A087ZSJ6|A0A087ZSJ6_APIME Uncharacterized protein OS=Apis mellifera GN=LOC100577053 PE=4 SV=1	uniprot-cflo3AUP000000311:tr|E1ZVT0|E1ZVT0_CAMFO Glycine dehydrogenase [decarboxylating], mitochondrial OS=Camponotus floridanus GN=EAG_02907 PE=3 SV=1	uniprot-sinv3AUP000006539:tr|E9IDT3|E9IDT3_SOLIN Putative uncharacterized protein (Fragment) OS=Solenopsis invicta GN=SINV_03018 PE=4 SV=1
OMA13825	Amelprot:gi|66514411|ref|XP_395323.2| PREDICTED: U3 small nucleolar ribonucleoprotein protein IMP4-like [Apis mellifera]	Cfelprot80:comp44162_c0_seq1_1_227	Cfloprot:gi|752860403|ref|XP_011251707.1| PREDICTED: U3 small nucleolar ribonucleoprotein protein IMP4 [Camponotus floridanus]	Sinvprot:gi|751204549|ref|XP_011175830.1| PREDICTED: U3 small nucleolar ribonucleoprotein protein IMP4 [Solenopsis invicta]	uniprot-apis3AUP000005203:tr|A0A087ZST9|A0A087ZST9_APIME Uncharacterized protein OS=Apis mellifera GN=LOC411856 PE=4 SV=1	uniprot-cflo3AUP000000311:tr|E1ZVS7|E1ZVS7_CAMFO U3 small nucleolar ribonucleoprotein protein IMP4 OS=Camponotus floridanus GN=EAG_02904 PE=4 SV=1	uniprot-sinv3AUP000006539:tr|E9IDT4|E9IDT4_SOLIN Putative uncharacterized protein (Fragment) OS=Solenopsis invicta GN=SINV_01837 PE=4 SV=1
OMA07290	Amelprot:gi|571545105|ref|XP_006564660.1| PREDICTED: nuclear RNA export factor 1-like [Apis mellifera]	Cfelprot80:comp65401_c0_seq2_217_1737	Cfloprot:gi|752883338|ref|XP_011259366.1| PREDICTED: nuclear RNA export factor 1-like [Camponotus floridanus]	Sinvprot:gi|751204553|ref|XP_011175832.1| PREDICTED: nuclear RNA export factor 1-like [Solenopsis invicta]	uniprot-apis3AUP000005203:tr|A0A087ZSK2|A0A087ZSK2_APIME Uncharacterized protein OS=Apis mellifera GN=LOC725134 PE=4 SV=1	uniprot-cflo3AUP000000311:tr|E2AJS6|E2AJS6_CAMFO Nuclear RNA export factor 1 OS=Camponotus floridanus GN=EAG_06293 PE=4 SV=1	uniprot-sinv3AUP000006539:tr|E9IDT6|E9IDT6_SOLIN Putative uncharacterized protein (Fragment) OS=Solenopsis invicta GN=SINV_04848 PE=4 SV=1
OMA05487	Amelprot:gi|328784688|ref|XP_394746.3| PREDICTED: putative uncharacterized protein DDB_G0282133-like isoform X2 [Apis mellifera]	Cfelprot80:comp65401_c0_seq6_58_1952	Cfloprot:gi|752883334|ref|XP_011259364.1| PREDICTED: GATA zinc finger domain-containing protein 14-like isoform X1 [Camponotus floridanus]	Sinvprot:gi|751204555|ref|XP_011175833.1| PREDICTED: GATA zinc finger domain-containing protein 14-like [Solenopsis invicta]	uniprot-apis3AUP000005203:tr|A0A087ZSK4|A0A087ZSK4_APIME Uncharacterized protein OS=Apis mellifera GN=LOC411273 PE=4 SV=1	uniprot-cflo3AUP000000311:tr|E2AJS5|E2AJS5_CAMFO Putative uncharacterized protein OS=Camponotus floridanus GN=EAG_06292 PE=4 SV=1	uniprot-sinv3AUP000006539:tr|E9IDT7|E9IDT7_SOLIN Putative uncharacterized protein (Fragment) OS=Solenopsis invicta GN=SINV_16086 PE=4 SV=1
OMA14849	Amelprot:gi|571545081|ref|XP_006564658.1| PREDICTED: cytochrome c-type heme lyase-like [Apis mellifera]	Cfelprot80:comp42358_c0_seq1_258_1030	Cfloprot:gi|752883332|ref|XP_011259362.1| PREDICTED: cytochrome c-type heme lyase [Camponotus floridanus]	Sinvprot:gi|751204557|ref|XP_011175834.1| PREDICTED: cytochrome c-type heme lyase [Solenopsis invicta]	uniprot-apis3AUP000005203:tr|A0A087ZSK5|A0A087ZSK5_APIME Uncharacterized protein OS=Apis mellifera GN=LOC408968 PE=4 SV=1	uniprot-cflo3AUP000000311:tr|E2AJS4|E2AJS4_CAMFO Cytochrome c-type heme lyase OS=Camponotus floridanus GN=EAG_06291 PE=4 SV=1	uniprot-sinv3AUP000006539:tr|E9IDT8|E9IDT8_SOLIN Putative uncharacterized protein (Fragment) OS=Solenopsis invicta GN=SINV_01786 PE=4 SV=1
OMA07549	Amelprot:gi|571510108|ref|XP_001120940.3| PREDICTED: TAF5-like RNA polymerase II p300/CBP-associated factor-associated factor 65 kDa subunit 5L-like [Apis mellifera]	Cfelprot80:comp62654_c1_seq2_1219_1831	Cfloprot:gi|752867032|ref|XP_011250528.1| PREDICTED: TAF5-like RNA polymerase II p300/CBP-associated factor-associated factor 65 kDa subunit 5L isoform X2 [Camponotus floridanus]	Sinvprot:gi|751204565|ref|XP_011175839.1| PREDICTED: TAF5-like RNA polymerase II p300/CBP-associated factor-associated factor 65 kDa subunit 5L [Solenopsis invicta]	uniprot-apis3AUP000005203:tr|A0A088ATH9|A0A088ATH9_APIME Uncharacterized protein OS=Apis mellifera PE=4 SV=1	uniprot-cflo3AUP000000311:tr|E2A2U2|E2A2U2_CAMFO TAF5-like RNA polymerase II p300/CBP-associated factor-associated factor 65 kDa subunit 5L OS=Camponotus floridanus GN=EAG_04139 PE=4 SV=1	uniprot-sinv3AUP000006539:tr|E9IDU0|E9IDU0_SOLIN Putative uncharacterized protein (Fragment) OS=Solenopsis invicta GN=SINV_04783 PE=4 SV=1
OMA02893	Amelprot:gi|328783757|ref|XP_003250340.1| PREDICTED: LOW QUALITY PROTEIN: coatomer subunit beta' [Apis mellifera]	Cfelprot80:comp54252_c0_seq1_334_3106	Cfloprot:gi|752878372|ref|XP_011256667.1| PREDICTED: coatomer subunit beta' [Camponotus floridanus]	Sinvprot:gi|751204573|ref|XP_011175844.1| PREDICTED: coatomer subunit beta' [Solenopsis invicta]	uniprot-apis3AUP000005203:tr|A0A087ZY82|A0A087ZY82_APIME Uncharacterized protein OS=Apis mellifera GN=beta'Cop PE=4 SV=1	uniprot-cflo3AUP000000311:tr|E2AEF8|E2AEF8_CAMFO Coatomer subunit beta' OS=Camponotus floridanus GN=EAG_06158 PE=4 SV=1	uniprot-sinv3AUP000006539:tr|E9IDU2|E9IDU2_SOLIN Putative uncharacterized protein (Fragment) OS=Solenopsis invicta GN=SINV_00070 PE=4 SV=1
OMA08139	Amelprot:gi|328788677|ref|XP_623950.2| PREDICTED: facilitated trehalose transporter Tret1-like [Apis mellifera]	Cfelprot80:comp53988_c0_seq1_679_2228	Cfloprot:gi|752883369|ref|XP_011259382.1| PREDICTED: facilitated trehalose transporter Tret1 isoform X1 [Camponotus floridanus]	Sinvprot:gi|751204597|ref|XP_011175856.1| PREDICTED: facilitated trehalose transporter Tret1 [Solenopsis invicta]	uniprot-apis3AUP000005203:tr|A0A088ASY5|A0A088ASY5_APIME Uncharacterized protein OS=Apis mellifera GN=LOC551553 PE=4 SV=1	uniprot-cflo3AUP000000311:tr|E2AJT4|E2AJT4_CAMFO Sugar transporter ERD6-like 6 OS=Camponotus floridanus GN=EAG_13729 PE=4 SV=1	uniprot-sinv3AUP000006539:tr|E9IDV1|E9IDV1_SOLIN Putative uncharacterized protein (Fragment) OS=Solenopsis invicta GN=SINV_08656 PE=4 SV=1
OMA09897	Amelprot:gi|571545715|ref|XP_006566882.1| PREDICTED: chitinase-like protein Idgf4-like isoform X2 [Apis mellifera]	Cfelprot80:comp36721_c0_seq1_175_1511	Cfloprot:gi|752883386|ref|XP_011259390.1| PREDICTED: chitinase-like protein Idgf4 isoform X1 [Camponotus floridanus]	Sinvprot:gi|751204619|ref|XP_011175868.1| PREDICTED: chitinase-like protein Idgf4 isoform X1 [Solenopsis invicta]	uniprot-apis3AUP000005203:tr|A0A088AMK2|A0A088AMK2_APIME Uncharacterized protein OS=Apis mellifera GN=LOC724987 PE=3 SV=1	uniprot-cflo3AUP000000311:tr|E2AJT8|E2AJT8_CAMFO Chitinase-like protein Idgf4 OS=Camponotus floridanus GN=EAG_13733 PE=3 SV=1	uniprot-sinv3AUP000006539:tr|E9IDV6|E9IDV6_SOLIN Putative uncharacterized protein (Fragment) OS=Solenopsis invicta GN=SINV_03668 PE=3 SV=1
[truncated: 23,771 more rows]
